# Supplementary material for: IKKε-deficient macrophages impede cardiac repair after myocardial infarction by enhancing the macrophage–myofibroblast transition
Source: Exp Mol Med. 2024 Sep 12;56(9):2052–64. doi: 10.1038/s12276-024-01304-0 (PMC11446912; doi:10.1038/s12276-024-01304-0)
Supplement: Supplementary file 2 — Supplementary Table 2 [file 12276_2024_1304_MOESM2_ESM.xlsx]

## Sheet: Summary
		KO up	KO down	Total
0	Macrophages 1	919	293	1212
11	Macrophages 2	18	128	146
13	Macrophages 3	7	6	13
1	Monocytes 1	187	646	833
14	Monocytes 2	14	34	48
2	Granulocytes 1	37	111	148
3	Fibroblast 1	980	1680	2660
4	Fibroblast 2	333	1522	1855
6	Fibroblasts 3	470	554	1024
9	Fibroblasts 4	22	17	39
10	Fibroblasts 5	104	39	143
12	Fibroblasts 6	312	1492	1804
5	EC 1	120	1058	1178
7	EC 2	378	49	427
8	EC 3	6	7	13
15	EC 4	105	10	115
16	EC 5	4	3	7
17	EC 6	9	5	14
18	B cells	0	0	0
19	Oligodendrocytes	10	0	10
20	T cells	0	0	0

## Sheet: 0 Macrophages 1
	p_val	avg_log2FC	pct.1	pct.2	p_val_adj
Chil3	2.19424e-138	3.6487	0.705	0.396	4.65903e-134
Uba52	4.29025e-117	-1.77942	0.85	0.948	9.10949e-113
Cmss1	4.05608e-91	-2.53761	0.145	0.397	8.61228e-87
Gab2	9.04625e-91	-2.13483	0.39	0.592	1.92079e-86
Pitpnc1	2.50777e-74	-1.97955	0.381	0.599	5.32474e-70
Ms4a7	7.72862e-72	-1.61209	0.726	0.889	1.64102e-67
Fcrls	4.88049e-62	-1.86035	0.267	0.704	1.03627e-57
Vav3	5.42895e-62	-1.52216	0.484	0.622	1.15273e-57
Zdhhc14	3.55075e-61	-1.56943	0.192	0.456	7.5393e-57
Camk1d	7.61971e-60	-1.51339	0.434	0.573	1.61789e-55
Rbm47	3.71436e-59	-1.42579	0.705	0.738	7.88669e-55
Tuba1c	2.46342e-56	0.856494	0.891	0.693	5.23057e-52
Slc8a1	1.38534e-55	-1.49142	0.282	0.495	2.9415e-51
Col3a1	8.29349e-55	-0.921848	0.373	0.76	1.76096e-50
Myo1e	1.03973e-54	-1.51852	0.491	0.633	2.20766e-50
Cebpb	4.01184e-53	0.89972	0.985	0.964	8.51834e-49
Ccl6	1.62797e-52	1.49629	0.941	0.906	3.45668e-48
Fmnl2	5.8636e-52	-1.75337	0.362	0.439	1.24502e-47
Cmip	6.61481e-52	-1.32085	0.541	0.632	1.40452e-47
Selenop	1.47471e-49	-1.4037	0.762	0.924	3.13125e-45
Phlpp1	3.49061e-49	-1.33186	0.093	0.329	7.41161e-45
Gm10076	4.31536e-49	-1.07636	0.895	0.969	9.1628e-45
Ccl9	6.56541e-49	1.19718	0.952	0.905	1.39403e-44
Sik3	1.10053e-48	-1.24763	0.314	0.49	2.33675e-44
Arhgap15	7.43565e-48	-1.17917	0.27	0.496	1.57881e-43
Gphn	8.7696e-48	-1.09546	0.114	0.368	1.86205e-43
Slc9a9	2.63698e-47	-1.21063	0.373	0.587	5.59909e-43
Fnip2	3.26907e-47	-1.38869	0.678	0.738	6.94121e-43
Zeb2	4.79533e-47	-1.07765	0.958	0.961	1.01819e-42
Ptprj	1.71935e-46	-1.16827	0.688	0.753	3.65069e-42
Col1a1	3.94177e-46	-0.846963	0.261	0.622	8.36955e-42
Pltp	1.04266e-44	-1.2421	0.419	0.78	2.21388e-40
Apoe	2.50651e-44	-1.34346	0.93	0.982	5.32207e-40
Igf1	4.04416e-44	-1.57684	0.246	0.636	8.58697e-40
Dennd1a	3.27727e-43	-1.1727	0.596	0.69	6.95863e-39
Arhgap10	5.46753e-43	-1.25501	0.552	0.654	1.16092e-38
Gm21860	3.43542e-42	0.581587	0.286	0.028	7.29442e-38
Gpr137b	4.77264e-42	-1.03987	0.653	0.82	1.01338e-37
Kcnk13	5.57247e-42	-1.00564	0.398	0.584	1.1832e-37
Gnaq	8.65099e-42	-1.02821	0.663	0.753	1.83687e-37
Atxn1	1.1052e-41	-1.09185	0.259	0.447	2.34667e-37
S100a11	2.04695e-41	0.950837	0.966	0.926	4.34628e-37
Ctsh	3.0122e-41	-0.959323	0.869	0.955	6.3958e-37
Lncpint	9.97523e-41	-1.13654	0.33	0.484	2.11804e-36
Plaur	1.39336e-40	0.927248	0.813	0.606	2.95852e-36
Lrmda	1.44883e-40	-2.21362	0.011	0.369	3.0763e-36
Ext1	4.6805e-40	-1.26909	0.349	0.457	9.9381e-36
Xylt1	4.75611e-40	-1.20127	0.379	0.478	1.00987e-35
Mrtfa	1.36758e-39	-0.949635	0.248	0.455	2.90378e-35
Exoc4	2.07243e-39	-0.950998	0.37	0.545	4.40038e-35
F10	6.21813e-39	1.00812	0.45	0.191	1.3203e-34
Snx24	1.69827e-38	-1.05713	0.627	0.691	3.60593e-34
Cox7a2l	5.39756e-38	-0.865257	0.667	0.852	1.14606e-33
Etv6	6.53892e-38	-0.972422	0.545	0.626	1.38841e-33
Cxcl16	1.05436e-37	-0.898177	0.726	0.895	2.23872e-33
Arid5b	3.98744e-37	-1.09813	0.537	0.664	8.46653e-33
Itgav	7.56419e-37	-0.992252	0.556	0.694	1.6061e-32
Gm47283	8.29865e-37	0.898652	0.859	0.63	1.76205e-32
Osbpl8	8.71611e-37	-1.12113	0.844	0.832	1.85069e-32
Wdr89	1.03972e-36	-0.646679	0.278	0.557	2.20765e-32
Diaph2	1.08289e-36	-0.967184	0.459	0.599	2.29929e-32
Aopep	2.41568e-36	-1.03129	0.712	0.786	5.12922e-32
Abca1	1.6459e-35	-1.02498	0.75	0.83	3.49473e-31
Pde7b	2.18166e-35	-1.16933	0.09	0.245	4.63232e-31
Alcam	2.80033e-35	-1.3117	0.657	0.614	5.94595e-31
Snx29	3.2899e-35	-0.88717	0.25	0.424	6.98543e-31
Arhgap24	7.36482e-35	-1.13663	0.411	0.488	1.56377e-30
Ecm1	1.27702e-34	0.992038	0.88	0.802	2.7115e-30
Baz2b	3.67248e-34	-0.903122	0.598	0.692	7.79778e-30
Adgre1	7.54218e-34	-0.885784	0.766	0.878	1.60143e-29
Gtdc1	1.35786e-33	-0.885205	0.097	0.289	2.88314e-29
Ly86	1.66e-33	-0.807279	0.815	0.912	3.52468e-29
Nav2	2.45076e-33	-0.955471	0.272	0.469	5.20371e-29
Ypel3	2.72061e-33	-0.763019	0.465	0.733	5.77667e-29
Pam	3.13678e-33	-0.797444	0.189	0.426	6.66032e-29
Apobec1	4.83646e-33	-0.766892	0.72	0.849	1.02692e-28
H2afv	5.50651e-33	-0.701213	0.394	0.662	1.1692e-28
Zswim6	5.62582e-33	-0.90029	0.51	0.583	1.19453e-28
Rreb1	1.25598e-32	-0.873822	0.469	0.566	2.66683e-28
Cdk8	4.42144e-32	-0.727183	0.232	0.437	9.38803e-28
Slc16a3	5.36772e-32	0.772276	0.663	0.47	1.13973e-27
Srgn	5.93446e-32	0.85483	0.964	0.952	1.26006e-27
Itgb2	8.3879e-32	0.677627	0.945	0.898	1.781e-27
Itga9	8.58675e-32	-0.953068	0.229	0.438	1.82322e-27
Rnf150	2.39853e-31	-0.852576	0.364	0.557	5.0928e-27
Mitf	2.57001e-31	-0.948168	0.442	0.548	5.45691e-27
Ambra1	3.49082e-31	-0.745281	0.223	0.41	7.41206e-27
Ppm1h	3.73654e-31	-0.849556	0.461	0.558	7.9338e-27
Maml2	6.19145e-31	-0.871386	0.063	0.229	1.31463e-26
Wwp1	1.2226e-30	-0.878617	0.524	0.69	2.59594e-26
Itgam	2.01502e-30	0.671693	0.91	0.878	4.2785e-26
Timp2	2.02396e-30	-1.08327	0.646	0.843	4.29747e-26
Arhgap18	2.7767e-30	-0.759008	0.55	0.695	5.89577e-26
Blnk	5.31661e-30	-0.867793	0.469	0.689	1.12887e-25
Rab8b	6.62691e-30	-0.802486	0.823	0.88	1.40709e-25
Map4k3	6.75477e-30	-0.797468	0.337	0.466	1.43424e-25
Chd9	7.25208e-30	-0.570855	0.345	0.598	1.53983e-25
Itm2b	8.84719e-30	-0.784882	0.989	0.983	1.87852e-25
Vti1a	8.96815e-30	-0.698997	0.267	0.448	1.90421e-25
Prkcb	1.27646e-29	-0.727781	0.326	0.562	2.7103e-25
mt-Nd3	1.28336e-29	-0.679517	0.931	0.964	2.72495e-25
Fli1	1.34045e-29	-0.721655	0.505	0.664	2.84618e-25
Elmo1	1.42848e-29	-0.88366	0.648	0.659	3.03309e-25
Clec12a	1.941e-29	-0.775022	0.577	0.805	4.12132e-25
Tmem176a	2.00794e-29	-1.10831	0.149	0.429	4.26346e-25
Mdfic	2.0176e-29	-0.762015	0.783	0.831	4.28398e-25
Ldlrad4	2.25467e-29	-0.763343	0.07	0.255	4.78734e-25
Fbxl17	3.08298e-29	-0.76296	0.2	0.344	6.54608e-25
Pparg	3.46032e-29	-0.924263	0.288	0.448	7.3473e-25
Bcas3	3.49527e-29	-0.742072	0.152	0.335	7.42152e-25
Serinc3	3.99972e-29	-0.725765	0.84	0.917	8.4926e-25
Ckb	5.83714e-29	-1.00709	0.594	0.862	1.2394e-24
Bach2	9.96515e-29	-0.758495	0.08	0.266	2.1159e-24
Fam172a	1.39373e-28	-0.727608	0.368	0.509	2.95932e-24
Eepd1	2.24609e-28	-0.821285	0.368	0.503	4.76912e-24
Col1a2	2.82763e-28	-0.634737	0.232	0.559	6.00391e-24
Trps1	2.88134e-28	-0.87695	0.615	0.69	6.11795e-24
Wdfy1	5.54042e-28	0.532964	0.571	0.339	1.1764e-23
Tbc1d5	6.13728e-28	-0.755688	0.398	0.518	1.30313e-23
Lpin2	6.64169e-28	-0.747861	0.53	0.66	1.41023e-23
St18	7.46592e-28	-1.22535	0.015	0.183	1.58524e-23
Tuba1b	9.40199e-28	0.773265	0.895	0.744	1.99632e-23
Tnfaip8l2	1.35245e-27	-0.69599	0.47	0.671	2.87165e-23
Arih1	2.0138e-27	-0.782709	0.592	0.664	4.27591e-23
Peak1	2.7241e-27	-0.796978	0.545	0.616	5.78407e-23
Ankrd28	3.33557e-27	-0.810594	0.345	0.497	7.08241e-23
Tanc2	3.5077e-27	-0.765574	0.177	0.35	7.44789e-23
Ern1	4.49756e-27	-0.764287	0.215	0.367	9.54967e-23
Hpgds	4.57393e-27	-0.805453	0.377	0.654	9.71182e-23
Fmn1	4.80827e-27	-0.897828	0.394	0.442	1.02094e-22
Zfp704	5.07566e-27	-0.707817	0.221	0.424	1.07771e-22
Nedd4l	5.18116e-27	-0.778296	0.276	0.419	1.10012e-22
C1qa	5.94911e-27	-1.17537	0.705	0.917	1.26317e-22
Mctp1	7.47168e-27	-0.915348	0.297	0.424	1.58646e-22
Myo5a	7.73396e-27	-0.784228	0.722	0.781	1.64215e-22
Btaf1	1.01841e-26	-0.683246	0.43	0.583	2.16238e-22
Cd164	1.035e-26	0.521706	0.636	0.403	2.19762e-22
Cers6	1.74963e-26	-0.793755	0.436	0.52	3.71498e-22
Rngtt	1.8978e-26	-0.720606	0.293	0.457	4.0296e-22
Hexa	1.98715e-26	-0.778028	0.914	0.943	4.21932e-22
Airn	3.04276e-26	-1.0905	0.059	0.167	6.4607e-22
Ccl2	3.3332e-26	1.34055	0.907	0.723	7.07738e-22
Foxp1	3.35712e-26	-0.761141	0.728	0.769	7.12817e-22
Mbnl2	3.90617e-26	-0.713536	0.844	0.881	8.29398e-22
Elf2	4.91535e-26	-0.736975	0.467	0.576	1.04368e-21
Rgs10	1.07943e-25	-0.68934	0.8	0.89	2.29195e-21
Sfmbt1	1.0947e-25	-0.729491	0.295	0.43	2.32438e-21
Aff1	1.42928e-25	-0.860936	0.571	0.542	3.0348e-21
Man1a	2.23083e-25	-0.847749	0.644	0.718	4.73672e-21
Pik3ap1	2.31573e-25	-0.654639	0.811	0.861	4.91698e-21
S100a4	2.80184e-25	0.974947	0.931	0.83	5.94915e-21
Postn	3.12884e-25	-0.542566	0.09	0.4	6.64346e-21
Kansl1	3.47294e-25	-0.735605	0.653	0.673	7.37408e-21
Vcan	5.05029e-25	0.645098	0.286	0.096	1.07233e-20
Lyst	5.53233e-25	-0.800776	0.385	0.526	1.17468e-20
Apbb2	6.42882e-25	-0.779065	0.084	0.225	1.36503e-20
Msr1	8.89406e-25	0.744856	0.876	0.768	1.88848e-20
Tmcc3	9.02855e-25	-0.822431	0.225	0.388	1.91703e-20
Arl15	1.19697e-24	-0.749149	0.084	0.212	2.54154e-20
Lilrb4a	1.2945e-24	0.614967	0.964	0.919	2.7486e-20
Nipbl	1.37484e-24	-0.602279	0.63	0.742	2.91919e-20
Pid1	1.73952e-24	-0.776386	0.865	0.884	3.69352e-20
Btbd9	2.37288e-24	-0.679663	0.463	0.52	5.03833e-20
Vps13b	2.52997e-24	-0.654811	0.274	0.39	5.37188e-20
Fbxo11	2.78552e-24	-0.735782	0.533	0.576	5.9145e-20
Ms4a8a	3.35079e-24	0.499301	0.379	0.137	7.11473e-20
Tmem176b	3.54664e-24	-1.09237	0.204	0.5	7.53058e-20
Fars2	3.64221e-24	-0.556983	0.21	0.391	7.7335e-20
Cdk14	4.32618e-24	-0.865929	0.543	0.572	9.18578e-20
Lcor	4.63361e-24	-0.648837	0.23	0.357	9.83854e-20
Map2k5	6.18577e-24	-0.565179	0.223	0.399	1.31342e-19
Stmn1	9.52529e-24	-0.942574	0.217	0.382	2.0225e-19
Cd72	1.21777e-23	-0.992659	0.301	0.618	2.5857e-19
Nsmce2	1.98787e-23	-0.622395	0.499	0.631	4.22084e-19
Trem1	2.19669e-23	0.574589	0.406	0.166	4.66422e-19
Wwox	3.52967e-23	-0.717516	0.133	0.245	7.49456e-19
Psd3	3.61557e-23	-0.836465	0.333	0.402	7.67694e-19
Cd24a	4.47573e-23	0.756013	0.442	0.162	9.50332e-19
Nav1	4.577e-23	-0.62815	0.528	0.681	9.71835e-19
Grcc10	6.11584e-23	-0.589121	0.67	0.829	1.29858e-18
Hexb	8.46898e-23	-0.722226	0.811	0.912	1.79822e-18
Msra	9.08755e-23	-0.615132	0.288	0.446	1.92956e-18
Emilin2	1.73269e-22	0.524432	0.88	0.817	3.67903e-18
Ccl24	1.88045e-22	1.10269	0.217	0.066	3.99276e-18
Arg1	2.08728e-22	1.71512	0.585	0.456	4.43191e-18
Plcl2	2.10582e-22	-0.646954	0.337	0.448	4.47128e-18
Mllt10	2.33401e-22	-0.546459	0.259	0.415	4.9558e-18
H2afz	2.70627e-22	-0.701846	0.895	0.956	5.74622e-18
Abr	3.39896e-22	-0.678189	0.657	0.675	7.21701e-18
Dok2	4.15106e-22	0.670649	0.674	0.466	8.81395e-18
Pou2f2	4.192e-22	-0.659761	0.358	0.612	8.90087e-18
Cd300lf	4.42823e-22	0.690981	0.65	0.437	9.40247e-18
Pfdn5	5.03184e-22	-0.568298	0.878	0.95	1.06841e-17
Pfkl	5.33766e-22	0.532352	0.619	0.467	1.13334e-17
Cd300a	5.90701e-22	-0.622625	0.589	0.765	1.25423e-17
Bhlhe40	6.58261e-22	0.678795	0.61	0.458	1.39769e-17
Ikbke	7.61836e-22	0.359636	0.337	0.132	1.61761e-17
Pnpla7	1.1174e-21	-0.516799	0.284	0.498	2.37257e-17
Abhd12	1.30505e-21	-0.605704	0.787	0.885	2.77102e-17
Atrnl1	1.67775e-21	-0.596025	0.152	0.276	3.56236e-17
Jdp2	1.90862e-21	0.627278	0.627	0.43	4.05258e-17
Traf3	2.43986e-21	-0.633113	0.242	0.368	5.18055e-17
Arhgap26	2.59937e-21	-0.670537	0.232	0.301	5.51924e-17
Thbd	2.96685e-21	0.610531	0.301	0.173	6.29952e-17
Nek7	3.30132e-21	-0.585926	0.427	0.586	7.00969e-17
Tbc1d22a	4.19708e-21	-0.566188	0.423	0.568	8.91166e-17
Nfkbia	4.29987e-21	0.780423	0.945	0.865	9.12991e-17
Trem2	6.03735e-21	-0.785622	0.859	0.916	1.28191e-16
Marcks	6.58466e-21	-0.540338	0.93	0.954	1.39812e-16
Zfand3	6.68521e-21	-0.617413	0.659	0.632	1.41947e-16
Actb	7.94076e-21	0.566851	1	0.999	1.68606e-16
Fnip1	8.03275e-21	-0.648547	0.703	0.7	1.70559e-16
Tns3	8.09277e-21	-0.655031	0.575	0.675	1.71834e-16
Rere	8.17863e-21	-0.559401	0.31	0.445	1.73657e-16
Hfe	8.36868e-21	-0.543959	0.337	0.597	1.77692e-16
Osm	9.91687e-21	0.630924	0.606	0.429	2.10565e-16
Cela1	1.00473e-20	-0.74472	0.204	0.43	2.13335e-16
4930430E12Rik	1.31462e-20	-0.648439	0.183	0.281	2.79134e-16
Tmem164	2.06798e-20	-0.583738	0.375	0.486	4.39094e-16
Hebp1	2.31658e-20	-0.589081	0.248	0.47	4.91879e-16
Id3	2.41483e-20	0.797012	0.36	0.243	5.12741e-16
Oaz1	2.70447e-20	-0.644364	0.928	0.969	5.74241e-16
Ighm	2.7396e-20	-0.609013	0.097	0.302	5.817e-16
Dennd4c	2.89149e-20	-0.640628	0.493	0.583	6.1395e-16
Cnot4	3.56622e-20	-0.52818	0.389	0.522	7.57215e-16
Aph1c	5.03987e-20	-0.582383	0.354	0.523	1.07011e-15
Rpl36a	5.77716e-20	-0.644887	0.895	0.971	1.22667e-15
Csrp1	6.92706e-20	-0.583291	0.463	0.636	1.47082e-15
Camk2d	7.82492e-20	-0.660431	0.764	0.804	1.66147e-15
Tank	8.21568e-20	-0.705826	0.589	0.609	1.74444e-15
Pdgfc	8.35551e-20	-0.539109	0.095	0.254	1.77413e-15
Per1	8.48628e-20	0.408486	0.632	0.455	1.80189e-15
Hnrnpd	9.522e-20	0.465347	0.888	0.774	2.02181e-15
Sash1	9.59628e-20	-0.668282	0.705	0.767	2.03758e-15
Gmfg	9.65622e-20	-0.559921	0.68	0.834	2.0503e-15
Itga6	1.0106e-19	-0.646407	0.503	0.71	2.1458e-15
Slc2a1	1.03066e-19	0.554754	0.518	0.328	2.18841e-15
Lcorl	1.1401e-19	-0.532135	0.251	0.373	2.42077e-15
Rpl17	1.20324e-19	-0.56921	0.99	0.99	2.55483e-15
Rgcc	1.2931e-19	0.91235	0.648	0.396	2.74564e-15
Unc93b1	1.29485e-19	-0.491958	0.924	0.954	2.74936e-15
Syngr1	1.70395e-19	-0.944631	0.413	0.647	3.618e-15
Runx1	2.01503e-19	-0.621747	0.705	0.767	4.27851e-15
Uqcrh	2.08533e-19	-0.550028	0.88	0.94	4.42778e-15
Gpat3	2.23873e-19	0.34176	0.299	0.098	4.75349e-15
Prdx4	2.38249e-19	-0.598179	0.448	0.632	5.05875e-15
Klf9	2.44838e-19	0.484885	0.545	0.267	5.19865e-15
Mir142hg	2.46536e-19	-0.525455	0.093	0.216	5.2347e-15
Rps9	2.86587e-19	-0.552815	0.985	0.994	6.08511e-15
Inpp5d	2.92269e-19	-0.545007	0.785	0.853	6.20576e-15
Csf2ra	3.10888e-19	0.47456	0.918	0.878	6.60107e-15
Bloc1s1	3.13983e-19	-0.479382	0.486	0.661	6.66681e-15
Ago3	3.55309e-19	-0.497584	0.307	0.453	7.54428e-15
Spic	3.8228e-19	-0.622299	0.051	0.188	8.11695e-15
Lyz2	4.0642e-19	-0.765418	0.987	0.993	8.62952e-15
Foxn3	4.11743e-19	-0.61938	0.575	0.661	8.74253e-15
Uvrag	4.25642e-19	-0.59373	0.617	0.661	9.03766e-15
Ly6e	4.5299e-19	0.671106	0.973	0.913	9.61834e-15
Pias1	5.20177e-19	-0.508308	0.429	0.542	1.10449e-14
Slfn4	5.4146e-19	0.748412	0.432	0.149	1.14968e-14
Exoc6b	6.04069e-19	-0.545414	0.305	0.42	1.28262e-14
Pkm	6.41053e-19	0.615555	0.99	0.952	1.36115e-14
Fndc3a	6.58219e-19	-0.608923	0.615	0.69	1.3976e-14
2410006H16Rik	7.40326e-19	-0.591693	0.482	0.635	1.57193e-14
Numb	7.9039e-19	-0.560452	0.276	0.375	1.67823e-14
Nop58	7.95765e-19	0.450284	0.577	0.399	1.68965e-14
Rnf180	8.248e-19	-0.455033	0.088	0.246	1.7513e-14
U2af2	8.27211e-19	0.421967	0.749	0.601	1.75642e-14
Eno1	1.15213e-18	0.638797	0.905	0.865	2.44632e-14
Lrrc8d	1.20218e-18	-0.62276	0.575	0.597	2.55259e-14
Wdfy3	1.39424e-18	-0.571014	0.501	0.618	2.96038e-14
Irak2	1.43169e-18	-0.584354	0.432	0.528	3.0399e-14
Dis3l2	1.53333e-18	-0.466146	0.166	0.301	3.25572e-14
Ube2g1	1.53573e-18	-0.486566	0.278	0.436	3.26081e-14
Dock10	1.56711e-18	-0.690508	0.773	0.753	3.32744e-14
Parp8	1.75521e-18	-0.488883	0.162	0.321	3.72685e-14
Sertad1	1.83669e-18	0.428707	0.76	0.594	3.89985e-14
Dclre1c	1.95555e-18	-0.535779	0.358	0.499	4.15221e-14
Macf1	2.01207e-18	-0.528977	0.73	0.817	4.27222e-14
S100a6	2.06559e-18	0.725117	0.977	0.926	4.38586e-14
Mbd5	2.24931e-18	-0.488315	0.116	0.255	4.77597e-14
Cd86	2.25068e-18	-0.717561	0.583	0.654	4.77887e-14
Smim14	2.26178e-18	-0.519063	0.592	0.771	4.80243e-14
Akap10	2.99554e-18	-0.495725	0.269	0.396	6.36044e-14
Zfp407	3.08036e-18	-0.522829	0.213	0.333	6.54053e-14
Crebbp	3.12313e-18	-0.509829	0.518	0.663	6.63134e-14
Tbxas1	3.2806e-18	-0.599727	0.703	0.817	6.9657e-14
Sh3kbp1	3.59401e-18	-0.597125	0.638	0.717	7.63116e-14
Rps15a	5.79333e-18	-0.639476	0.96	0.985	1.2301e-13
AU020206	6.05414e-18	-0.437871	0.213	0.393	1.28548e-13
Plxdc2	6.47091e-18	-0.607326	0.086	0.221	1.37397e-13
Trio	7.99495e-18	-0.623622	0.478	0.532	1.69757e-13
Rpl7	8.81205e-18	-0.549778	0.949	0.977	1.87106e-13
Pld4	1.02098e-17	-0.51307	0.792	0.882	2.16785e-13
Rabep1	1.05835e-17	-0.529583	0.381	0.512	2.24719e-13
Mmp9	1.09699e-17	1.29682	0.166	0.066	2.32923e-13
Specc1	1.11712e-17	-0.551922	0.455	0.562	2.37197e-13
Tgm2	1.17523e-17	0.58742	0.834	0.798	2.49536e-13
Lilra6	1.25481e-17	0.279248	0.198	0.07	2.66433e-13
Id1	1.25974e-17	0.42487	0.246	0.069	2.6748e-13
Mif	1.31958e-17	0.653807	0.926	0.884	2.80186e-13
Rapgef2	1.82172e-17	-0.689987	0.312	0.413	3.86805e-13
Relb	1.98505e-17	-0.503771	0.349	0.509	4.21486e-13
Smurf2	2.00846e-17	-0.469895	0.223	0.353	4.26456e-13
Rps14	2.01532e-17	-0.510485	0.99	0.993	4.27914e-13
Ezr	2.14261e-17	0.460918	0.785	0.628	4.54941e-13
Fbxo42	2.15226e-17	-0.451285	0.219	0.348	4.56989e-13
Cenpa	2.58497e-17	-0.609865	0.39	0.533	5.48867e-13
Atp2b1	2.68028e-17	-0.529162	0.949	0.957	5.69105e-13
Tmem256	2.87143e-17	-0.607164	0.739	0.88	6.09691e-13
Cd300c2	2.97155e-17	-0.523532	0.859	0.927	6.30948e-13
Slc16a10	4.00103e-17	-0.601943	0.566	0.632	8.49539e-13
Tab2	4.06173e-17	-0.455984	0.564	0.711	8.62427e-13
Id2	4.15161e-17	0.669717	0.891	0.803	8.81512e-13
Cadm1	4.37169e-17	-0.69287	0.061	0.191	9.2824e-13
Clic4	4.55141e-17	-0.566655	0.804	0.838	9.66401e-13
Ifitm3	4.55853e-17	0.614706	0.985	0.972	9.67912e-13
Fus	4.7022e-17	0.407452	0.931	0.892	9.98418e-13
Thbs1	4.85516e-17	0.915614	0.832	0.754	1.0309e-12
Arid1b	4.88612e-17	-0.494673	0.425	0.519	1.03747e-12
Tcf12	5.06822e-17	-0.550663	0.495	0.549	1.07614e-12
Dyrk1a	5.30885e-17	-0.480897	0.43	0.541	1.12723e-12
Dip2b	5.3224e-17	-0.521433	0.394	0.484	1.1301e-12
Uty	5.61433e-17	-0.453657	0.192	0.34	1.19209e-12
Ankhd1	6.67002e-17	-0.48438	0.436	0.545	1.41624e-12
Slamf7	6.76817e-17	-0.576226	0.364	0.566	1.43709e-12
Mylip	6.77254e-17	-0.487652	0.349	0.508	1.43801e-12
Ndufb11	6.80394e-17	-0.503522	0.787	0.862	1.44468e-12
Pira2	7.05561e-17	0.465964	0.478	0.299	1.49812e-12
Selenom	7.51144e-17	-0.49252	0.225	0.435	1.5949e-12
Tmsb4x	7.78437e-17	-0.565987	0.998	0.999	1.65286e-12
Ccdc71l	8.10523e-17	0.434645	0.541	0.38	1.72098e-12
Aif1	8.2439e-17	-0.56526	0.817	0.928	1.75043e-12
Rnpep	8.97075e-17	0.462138	0.85	0.771	1.90476e-12
Pde3b	9.09742e-17	-0.499441	0.198	0.327	1.93166e-12
Klf4	9.51662e-17	0.617752	0.848	0.724	2.02066e-12
Maml3	9.99419e-17	-0.596171	0.189	0.274	2.12207e-12
Ltb4r1	1.05212e-16	0.640723	0.59	0.374	2.23396e-12
Rftn1	1.10419e-16	-0.568081	0.577	0.662	2.34452e-12
Ggta1	1.14349e-16	-0.496792	0.333	0.495	2.42798e-12
Fbxl5	1.35134e-16	0.52811	0.606	0.546	2.8693e-12
Tcof1	1.45696e-16	0.39417	0.661	0.488	3.09356e-12
Kdm4c	1.5819e-16	-0.384339	0.145	0.297	3.35885e-12
Rpl35	1.60369e-16	-0.535451	0.975	0.982	3.40511e-12
Zfp467	1.61134e-16	-0.386546	0.156	0.346	3.42136e-12
C1qc	1.63556e-16	-0.793977	0.783	0.917	3.47278e-12
Nr6a1	1.78979e-16	-0.409276	0.046	0.162	3.80026e-12
Tcf4	1.85052e-16	-0.554289	0.697	0.758	3.92922e-12
Pan3	1.93597e-16	-0.52371	0.459	0.542	4.11064e-12
Xylt2	1.96515e-16	-0.430877	0.278	0.47	4.17259e-12
Pde4d	2.14643e-16	-0.782562	0.261	0.309	4.55751e-12
AW112010	2.39532e-16	-0.531942	0.181	0.362	5.08598e-12
G530011O06Rik	2.75073e-16	0.462319	0.352	0.202	5.84063e-12
Gatm	3.46781e-16	-0.543963	0.261	0.473	7.36319e-12
Pdia4	3.59139e-16	0.550918	0.764	0.675	7.6256e-12
Glipr2	4.06257e-16	0.467666	0.43	0.273	8.62606e-12
Erbin	4.09935e-16	-0.497725	0.602	0.664	8.70416e-12
Rpl35a	4.11042e-16	-0.496409	0.985	0.994	8.72766e-12
Dock4	4.59488e-16	-0.603957	0.491	0.544	9.75631e-12
Pim1	4.91158e-16	0.448425	0.941	0.915	1.04288e-11
Smyd3	5.35525e-16	-0.500579	0.135	0.242	1.13708e-11
Hk2	5.82025e-16	0.487679	0.619	0.407	1.23581e-11
Mxd1	5.96633e-16	0.535057	0.577	0.376	1.26683e-11
Cd36	5.98123e-16	-1.05311	0.51	0.659	1.26999e-11
Prkch	6.25826e-16	-0.46909	0.291	0.438	1.32882e-11
Ppfia4	6.26138e-16	-0.341369	0.131	0.334	1.32948e-11
Atp8a1	9.20453e-16	-0.482821	0.404	0.557	1.9544e-11
Higd2a	9.51555e-16	-0.426539	0.493	0.658	2.02044e-11
Slc38a6	1.02968e-15	-0.465979	0.225	0.409	2.18632e-11
Ust	1.03059e-15	-0.436586	0.034	0.132	2.18825e-11
Grk5	1.04728e-15	-0.51497	0.133	0.225	2.22368e-11
Stard9	1.11107e-15	-0.412764	0.288	0.454	2.35913e-11
Rps4x	1.11591e-15	-0.540901	0.975	0.984	2.36942e-11
Ncoa1	1.14873e-15	-0.46594	0.35	0.477	2.43911e-11
Slc49a4	1.206e-15	-0.485393	0.339	0.473	2.5607e-11
Srgap2	1.22537e-15	-0.522202	0.564	0.641	2.60184e-11
Cpeb4	1.36518e-15	-0.586298	0.49	0.584	2.89869e-11
Rnf169	1.41535e-15	-0.402424	0.187	0.313	3.00522e-11
Pik3r5	1.48145e-15	-0.551503	0.615	0.663	3.14557e-11
Nlrp3	1.51607e-15	0.559971	0.731	0.531	3.21906e-11
Tnrc6b	1.62414e-15	-0.447355	0.322	0.474	3.44853e-11
Gm1673	1.92624e-15	-0.411258	0.061	0.199	4.08998e-11
Rps24	2.08407e-15	-0.492231	0.99	0.997	4.4251e-11
Ddx21	2.17732e-15	0.408187	0.733	0.633	4.62311e-11
S100a1	2.38637e-15	-0.467573	0.436	0.615	5.06698e-11
Hp	2.45377e-15	0.593708	0.309	0.185	5.2101e-11
Pcmtd1	2.47019e-15	-0.409619	0.297	0.46	5.24495e-11
Smg6	2.51763e-15	-0.474282	0.314	0.409	5.34569e-11
Vegfa	2.71094e-15	0.6357	0.51	0.367	5.75613e-11
Stag1	2.82217e-15	-0.47203	0.528	0.592	5.99231e-11
Ulk2	3.0348e-15	-0.399381	0.232	0.397	6.4438e-11
Nck2	3.38555e-15	-0.497917	0.112	0.207	7.18855e-11
Fbxw11	4.06985e-15	-0.487934	0.497	0.552	8.6415e-11
Glis3	4.17245e-15	-0.44006	0.046	0.137	8.85937e-11
Trf	4.3168e-15	-0.721285	0.524	0.766	9.16587e-11
Zbtb20	4.43437e-15	-0.616567	0.368	0.499	9.41549e-11
Gyg	4.56876e-15	-0.559034	0.36	0.538	9.70085e-11
Lpxn	4.60803e-15	-0.461261	0.701	0.765	9.78424e-11
Atp9b	4.75515e-15	-0.452208	0.389	0.463	1.00966e-10
Inpp4b	5.03966e-15	-0.346385	0.053	0.183	1.07007e-10
Kmt5a	5.51577e-15	0.462294	0.699	0.538	1.17116e-10
Ctse	5.74863e-15	-0.617598	0.006	0.319	1.22061e-10
Ppp1r12a	5.94262e-15	-0.435381	0.735	0.77	1.2618e-10
Antxr2	6.03287e-15	-0.588266	0.516	0.546	1.28096e-10
Fbxo32	6.30297e-15	-0.73249	0.223	0.327	1.33831e-10
Cycs	6.32466e-15	0.527319	0.825	0.736	1.34292e-10
Phf20	7.141e-15	-0.39851	0.339	0.503	1.51625e-10
Serpinb6a	7.29325e-15	-0.877501	0.484	0.678	1.54858e-10
Entpd1	7.90858e-15	-0.508975	0.486	0.595	1.67923e-10
Paip2	7.95812e-15	-0.423307	0.583	0.716	1.68975e-10
Gm2a	8.02052e-15	0.476968	0.928	0.912	1.703e-10
Cux1	8.62477e-15	-0.484385	0.817	0.826	1.8313e-10
Hnrnpdl	1.05821e-14	0.385608	0.813	0.749	2.2469e-10
Fau	1.1198e-14	-0.444951	0.998	0.995	2.37766e-10
Rps5	1.15858e-14	-0.508713	0.966	0.984	2.46001e-10
Fbxl20	1.16628e-14	-0.356867	0.181	0.318	2.47637e-10
Usp32	1.25213e-14	-0.37778	0.238	0.384	2.65865e-10
Slc23a2	1.26305e-14	-0.464021	0.333	0.446	2.68184e-10
4930402H24Rik	1.27418e-14	-0.4021	0.238	0.338	2.70548e-10
Ets2	1.30049e-14	0.43177	0.806	0.676	2.76132e-10
Csrnp1	1.35193e-14	0.46825	0.659	0.505	2.87056e-10
Tnfrsf1b	1.41799e-14	-0.47916	0.684	0.777	3.01081e-10
Utrn	1.62482e-14	-0.430881	0.223	0.343	3.44997e-10
Hnrnpab	1.63002e-14	0.424799	0.893	0.837	3.46101e-10
Chst11	1.6966e-14	-0.7033	0.301	0.319	3.60239e-10
Dip2c	1.70928e-14	-0.505593	0.206	0.279	3.62932e-10
Ophn1	1.73804e-14	-0.461611	0.305	0.442	3.69038e-10
Sppl3	1.8183e-14	-0.436848	0.436	0.543	3.86079e-10
Lpcat2	1.82746e-14	-0.452179	0.335	0.538	3.88024e-10
Hypk	1.86078e-14	0.407375	0.59	0.442	3.95099e-10
Cxcl3	2.01423e-14	1.31457	0.383	0.176	4.27682e-10
Snx2	2.43333e-14	0.493658	0.855	0.801	5.16669e-10
Tmcc1	2.45754e-14	-0.508332	0.356	0.47	5.2181e-10
Sema4d	2.54636e-14	-0.487611	0.438	0.626	5.40669e-10
Smagp	2.7153e-14	-0.402519	0.187	0.355	5.76539e-10
Hopx	3.36587e-14	0.316859	0.295	0.157	7.14675e-10
Arhgap22	3.54421e-14	-0.450707	0.375	0.481	7.52543e-10
Ms4a14	3.58038e-14	-0.373112	0.181	0.351	7.60222e-10
Hacd4	3.60334e-14	-0.493685	0.646	0.757	7.65097e-10
Birc5	3.60671e-14	-0.389833	0.025	0.117	7.65812e-10
Prpf19	4.38048e-14	0.33935	0.503	0.348	9.30108e-10
Kat6b	4.38101e-14	-0.382846	0.158	0.298	9.30221e-10
Eif3h	4.63713e-14	-0.435909	0.861	0.914	9.84601e-10
Fndc3b	4.67796e-14	-0.538739	0.571	0.575	9.93271e-10
Rptor	5.01954e-14	-0.428149	0.33	0.433	1.0658e-09
Atxn7l1	5.412e-14	-0.409083	0.387	0.487	1.14913e-09
Dennd1b	5.64123e-14	-0.414266	0.349	0.466	1.1978e-09
Rpl30	6.03764e-14	-0.506929	0.958	0.987	1.28197e-09
Tarm1	6.4646e-14	0.314428	0.221	0.089	1.37263e-09
Rps20	6.47015e-14	-0.478642	0.983	0.995	1.37381e-09
Tgfbr1	6.60887e-14	-0.459583	0.512	0.647	1.40326e-09
Eif3j1	6.65055e-14	0.387101	0.775	0.696	1.41211e-09
S100a10	6.74611e-14	0.567395	0.966	0.921	1.4324e-09
Junb	7.53479e-14	0.488309	0.983	0.96	1.59986e-09
Pros1	7.68766e-14	-0.340964	0.175	0.343	1.63232e-09
Tubb2a	7.80932e-14	0.498418	0.77	0.665	1.65815e-09
Bex3	8.11442e-14	-0.439805	0.307	0.481	1.72293e-09
Creg1	8.3062e-14	-0.610219	0.804	0.903	1.76365e-09
Usp34	9.30216e-14	-0.41288	0.514	0.645	1.97513e-09
Dlg1	9.61612e-14	-0.42042	0.286	0.39	2.04179e-09
Rnf216	9.95766e-14	-0.399474	0.387	0.495	2.11431e-09
Hdac8	1.02723e-13	-0.343367	0.061	0.168	2.18111e-09
Slc38a2	1.14807e-13	0.418508	0.728	0.593	2.4377e-09
Tex2	1.19107e-13	-0.455173	0.215	0.332	2.529e-09
Lsp1	1.28583e-13	0.536697	0.914	0.842	2.73021e-09
Trerf1	1.30394e-13	-0.515175	0.269	0.363	2.76865e-09
Glipr1	1.35216e-13	-0.496945	0.629	0.766	2.87104e-09
Elf4	1.39223e-13	-0.367246	0.288	0.423	2.95612e-09
Gm34084	1.45302e-13	-0.479661	0.32	0.478	3.08521e-09
Ifnar2	1.55045e-13	-0.403089	0.851	0.891	3.29207e-09
Zhx2	1.78082e-13	-0.309091	0.015	0.133	3.78122e-09
Vps41	1.78766e-13	-0.371306	0.448	0.611	3.79575e-09
Prex1	1.96536e-13	-0.393094	0.604	0.697	4.17304e-09
Abi1	2.11482e-13	-0.425746	0.777	0.829	4.49039e-09
Armh3	2.24536e-13	-0.347521	0.143	0.254	4.76756e-09
Otulinl	2.28114e-13	-0.439159	0.583	0.701	4.84354e-09
Dock2	2.30365e-13	-0.480085	0.806	0.799	4.89135e-09
Kdm6a	2.33948e-13	-0.401693	0.286	0.369	4.96741e-09
Rps10	2.40908e-13	-0.473792	0.99	0.988	5.11521e-09
Akt3	2.48666e-13	-0.394727	0.11	0.227	5.27992e-09
Snap23	2.58401e-13	-0.408484	0.587	0.713	5.48662e-09
Bcar3	2.68788e-13	-0.631965	0.352	0.422	5.70718e-09
Plcb1	2.69921e-13	-0.567325	0.088	0.146	5.73124e-09
Gngt2	2.75616e-13	-0.510988	0.745	0.874	5.85215e-09
Mcemp1	2.83821e-13	0.289439	0.187	0.075	6.02637e-09
Bst1	2.90664e-13	0.448124	0.653	0.536	6.17166e-09
Ccl7	3.0489e-13	1.12753	0.743	0.565	6.47372e-09
Ppfibp2	3.26402e-13	-0.412133	0.147	0.263	6.93049e-09
Sqstm1	3.27248e-13	-0.555295	0.865	0.873	6.94845e-09
Nceh1	3.28788e-13	-0.549605	0.684	0.805	6.98116e-09
Tagln2	3.59595e-13	0.499876	0.968	0.92	7.63529e-09
Dock1	3.70415e-13	-0.372903	0.251	0.372	7.86501e-09
Rassf8	3.74133e-13	-0.469293	0.189	0.29	7.94396e-09
Epb41	3.84279e-13	-0.4245	0.394	0.516	8.1594e-09
Rps3a1	3.99751e-13	-0.491096	0.975	0.982	8.48791e-09
Spty2d1	4.2479e-13	0.374039	0.69	0.535	9.01956e-09
Coro1b	4.28777e-13	-0.306176	0.19	0.344	9.10422e-09
Sipa1l1	4.30853e-13	-0.419347	0.267	0.386	9.14831e-09
Enox2	4.37366e-13	-0.404262	0.219	0.313	9.2866e-09
Cybb	4.58317e-13	-0.49606	0.808	0.899	9.73145e-09
Arf6	4.59784e-13	0.365575	0.731	0.608	9.7626e-09
Fyb	4.73382e-13	-0.430778	0.91	0.929	1.00513e-08
Ehd1	4.85593e-13	0.413688	0.92	0.809	1.03106e-08
Kif13b	5.14606e-13	-0.444577	0.349	0.482	1.09266e-08
Prdx6	5.34905e-13	0.540119	0.796	0.748	1.13576e-08
Wfdc21	5.70729e-13	0.386912	0.122	0.015	1.21183e-08
Sestd1	5.9062e-13	-0.41105	0.39	0.472	1.25406e-08
Rpl10a	5.931e-13	-0.498034	0.943	0.978	1.25933e-08
Nme4	6.26293e-13	-0.359269	0.198	0.394	1.32981e-08
Alpk1	6.39542e-13	-0.347501	0.086	0.191	1.35794e-08
Igbp1	6.83997e-13	-0.349638	0.455	0.613	1.45233e-08
Cd81	7.17642e-13	-0.750261	0.335	0.578	1.52377e-08
Dhx40	7.29138e-13	-0.389273	0.278	0.418	1.54818e-08
Fam162a	7.30711e-13	0.443348	0.562	0.481	1.55152e-08
Rpl13a	7.35397e-13	-0.4137	0.979	0.991	1.56147e-08
Zfp608	7.49436e-13	-0.433146	0.225	0.314	1.59128e-08
Ptpra	7.49954e-13	-0.424154	0.638	0.762	1.59238e-08
Phlda1	7.86694e-13	0.531648	0.558	0.368	1.67039e-08
C1qb	8.60257e-13	-0.676019	0.823	0.946	1.82658e-08
Eya3	8.70631e-13	-0.377882	0.238	0.357	1.84861e-08
Plxnc1	8.75213e-13	-0.461806	0.33	0.446	1.85834e-08
Med13	8.82208e-13	-0.408169	0.398	0.499	1.87319e-08
Bmyc	9.23383e-13	-0.370396	0.263	0.434	1.96062e-08
Napsa	9.23717e-13	0.531823	0.608	0.39	1.96133e-08
Nfkb1	9.67005e-13	-0.565653	0.672	0.749	2.05324e-08
Vwa8	9.72889e-13	-0.334099	0.124	0.23	2.06574e-08
Gm26740	1.00216e-12	-0.380227	0.173	0.281	2.12789e-08
Hnrnpa0	1.04032e-12	0.343246	0.92	0.893	2.2089e-08
Polr2f	1.04576e-12	0.371423	0.878	0.784	2.22046e-08
Lrch1	1.06313e-12	-0.383863	0.21	0.315	2.25735e-08
Reps2	1.07724e-12	-0.395206	0.12	0.239	2.2873e-08
Slc20a1	1.21104e-12	0.370039	0.459	0.302	2.5714e-08
Rab40c	1.23089e-12	-0.311713	0.162	0.298	2.61354e-08
Ccr1	1.25054e-12	0.484111	0.836	0.681	2.65528e-08
Asah1	1.26568e-12	-0.447289	0.693	0.84	2.68742e-08
Fbl	1.29524e-12	0.3816	0.762	0.69	2.75018e-08
Cpq	1.35938e-12	-0.381441	0.2	0.341	2.88638e-08
Synj1	1.411e-12	-0.412353	0.57	0.662	2.99598e-08
Map3k3	1.44565e-12	-0.355408	0.272	0.41	3.06955e-08
Rell1	1.47483e-12	-0.383807	0.282	0.408	3.13151e-08
Stk3	1.52081e-12	-0.36544	0.206	0.328	3.22913e-08
Lilr4b	1.57291e-12	0.423496	0.931	0.903	3.33976e-08
Frmd4b	1.62616e-12	-0.515704	0.53	0.616	3.45282e-08
Glb1	1.73494e-12	-0.39076	0.41	0.583	3.68379e-08
Hscb	1.73685e-12	-0.330559	0.251	0.426	3.68785e-08
Mrtfb	1.75148e-12	-0.424385	0.24	0.327	3.71891e-08
Rab2a	1.80616e-12	-0.408798	0.8	0.87	3.83501e-08
Nbdy	1.81451e-12	-0.278114	0.156	0.325	3.85274e-08
Clec5a	1.90968e-12	0.376888	0.411	0.274	4.05482e-08
Fabp4	1.91611e-12	-1.04684	0.442	0.529	4.06847e-08
Zmym4	1.99966e-12	-0.307455	0.166	0.299	4.24587e-08
Adap2	2.15557e-12	-0.380936	0.505	0.641	4.57692e-08
Gm35154	2.20464e-12	-0.251139	0.067	0.197	4.6811e-08
Limd2	2.57397e-12	-0.429119	0.524	0.702	5.46531e-08
Mpp5	2.64784e-12	-0.322804	0.154	0.267	5.62215e-08
Trim14	2.64936e-12	-0.268	0.069	0.183	5.62539e-08
Braf	2.68104e-12	-0.396673	0.358	0.436	5.69266e-08
Brk1	2.80277e-12	-0.42129	0.783	0.871	5.95112e-08
Rsrc1	3.05564e-12	-0.381684	0.434	0.539	6.48804e-08
Chd2	3.09203e-12	-0.421087	0.429	0.526	6.5653e-08
Mafk	3.1007e-12	0.315038	0.448	0.321	6.58372e-08
Cx3cr1	3.11481e-12	-0.640924	0.204	0.454	6.61368e-08
Mmp14	3.20984e-12	-0.482237	0.514	0.706	6.81546e-08
Lgals9	3.2634e-12	0.437531	0.808	0.692	6.92918e-08
Pdss2	3.27574e-12	-0.273125	0.061	0.177	6.95538e-08
St13	3.31258e-12	0.39324	0.901	0.856	7.03361e-08
Wdr7	3.31749e-12	-0.344778	0.147	0.266	7.04403e-08
Rdm1	3.32575e-12	-0.256686	0.074	0.201	7.06158e-08
Srsf7	3.36332e-12	0.364865	0.855	0.769	7.14135e-08
Large1	3.42676e-12	-0.330111	0.034	0.114	7.27604e-08
Ubr5	3.55599e-12	-0.383513	0.432	0.555	7.55043e-08
Rps8	3.577e-12	-0.442806	0.994	0.998	7.59505e-08
Ranbp9	3.67549e-12	-0.358363	0.383	0.513	7.80416e-08
Nf1	3.79823e-12	-0.343265	0.257	0.368	8.06477e-08
Cxcl2	3.81362e-12	0.824682	0.92	0.782	8.09746e-08
Pgk1	3.83509e-12	0.531518	0.863	0.836	8.14306e-08
Frs2	4.07732e-12	-0.302346	0.156	0.272	8.65737e-08
Zmiz1	4.14565e-12	-0.446307	0.811	0.836	8.80246e-08
Hist2h2aa1	4.36787e-12	-0.267635	0.088	0.22	9.2743e-08
Tmem59	4.41105e-12	-0.39182	0.697	0.823	9.36598e-08
Sik2	4.51032e-12	-0.381197	0.223	0.331	9.57676e-08
Tmem140	4.6164e-12	-0.35263	0.192	0.348	9.80201e-08
Hipk2	4.76217e-12	-0.47927	0.493	0.532	1.01115e-07
Selenoh	4.82442e-12	-0.46388	0.499	0.581	1.02437e-07
Gda	4.84479e-12	0.489601	0.827	0.751	1.02869e-07
Rps7	4.84582e-12	-0.476205	0.956	0.985	1.02891e-07
Zmynd15	4.85858e-12	-0.295334	0.122	0.288	1.03162e-07
Ube2c	5.53369e-12	-0.296436	0.025	0.109	1.17497e-07
Mertk	5.74899e-12	-0.483986	0.49	0.551	1.22068e-07
Mgat5	5.77857e-12	-0.474061	0.503	0.588	1.22696e-07
Pfn1	5.82593e-12	0.43042	0.992	0.985	1.23702e-07
Olfml3	5.86358e-12	-0.42725	0.194	0.418	1.24501e-07
Mtss1	6.01669e-12	-0.540966	0.743	0.781	1.27752e-07
Rpl37a	6.39865e-12	-0.39153	0.994	0.995	1.35862e-07
Zcchc7	6.6552e-12	-0.379174	0.47	0.573	1.4131e-07
Sesn1	6.66813e-12	-0.347329	0.2	0.348	1.41584e-07
Disc1	6.9819e-12	-0.252033	0.065	0.178	1.48247e-07
Nlrp1b	7.07225e-12	-0.29351	0.088	0.182	1.50165e-07
Snx13	7.25287e-12	-0.37662	0.309	0.417	1.54e-07
R3hcc1l	7.37811e-12	-0.344437	0.272	0.41	1.56659e-07
Rps13	8.08963e-12	-0.454469	0.979	0.989	1.71767e-07
Clasp2	8.5835e-12	-0.3669	0.25	0.356	1.82254e-07
Ctsc	9.13799e-12	-0.476252	0.95	0.973	1.94027e-07
Anxa2	1.06772e-11	0.528645	0.956	0.914	2.26708e-07
Dgkd	1.1014e-11	-0.364818	0.465	0.559	2.3386e-07
Birc3	1.10917e-11	-0.418119	0.404	0.504	2.35511e-07
Tcf20	1.14642e-11	-0.340725	0.242	0.344	2.43419e-07
Susd3	1.14964e-11	-0.352706	0.413	0.559	2.44103e-07
Scaper	1.22306e-11	-0.322075	0.133	0.245	2.59692e-07
Arid4b	1.37535e-11	-0.384288	0.427	0.541	2.92029e-07
Cyp27a1	1.43597e-11	-0.260726	0.11	0.242	3.049e-07
Rps15	1.51632e-11	-0.378754	0.985	0.989	3.21961e-07
Sptssa	1.62785e-11	-0.474085	0.691	0.786	3.45642e-07
Pip4p1	1.64695e-11	-0.343062	0.442	0.597	3.49698e-07
Tnf	1.73846e-11	0.48797	0.48	0.324	3.69127e-07
Slpi	1.76164e-11	0.73355	0.202	0.045	3.74049e-07
Ifi27	1.91318e-11	-0.520045	0.484	0.647	4.06226e-07
Tut4	1.92851e-11	-0.398518	0.413	0.501	4.09481e-07
Itm2c	1.97067e-11	-0.393119	0.77	0.838	4.18432e-07
Arglu1	1.97383e-11	0.327191	0.781	0.693	4.19104e-07
Rhov	1.99529e-11	0.345006	0.358	0.217	4.2366e-07
Rab43	2.03805e-11	-0.390241	0.547	0.63	4.32738e-07
Scp2	2.04485e-11	-0.371972	0.792	0.876	4.34183e-07
Mir99ahg	2.07062e-11	-0.402662	0.07	0.158	4.39654e-07
AW554918	2.17072e-11	-0.27414	0.082	0.174	4.60909e-07
Tec	2.21079e-11	-0.38107	0.39	0.498	4.69417e-07
Wars2	2.21227e-11	-0.254996	0.053	0.152	4.69731e-07
Naip2	2.28319e-11	-0.301013	0.248	0.403	4.84791e-07
Rpl23	2.35466e-11	-0.395269	0.992	0.997	4.99965e-07
Prr14l	2.44151e-11	-0.311909	0.17	0.279	5.18407e-07
Rab31	2.69484e-11	-0.409034	0.625	0.686	5.72195e-07
Atraid	2.74326e-11	-0.367433	0.505	0.633	5.82476e-07
Ndufb10	2.84293e-11	-0.392686	0.743	0.829	6.03638e-07
Qk	2.84735e-11	-0.397504	0.857	0.876	6.04577e-07
Rnf126	2.88456e-11	0.292231	0.488	0.387	6.1248e-07
Glg1	2.9531e-11	-0.383618	0.594	0.725	6.27031e-07
Kcnab2	3.04329e-11	0.336792	0.503	0.378	6.46182e-07
Ogfrl1	3.15925e-11	0.35183	0.621	0.469	6.70804e-07
Polr2a	3.30517e-11	-0.34935	0.566	0.682	7.01787e-07
Tpi1	3.50345e-11	0.499719	0.899	0.835	7.43888e-07
Myo9a	3.51673e-11	-0.343069	0.269	0.373	7.46707e-07
Tbc1d8	3.55954e-11	-0.285556	0.112	0.221	7.55797e-07
Tmem141	3.81112e-11	-0.342852	0.267	0.447	8.09215e-07
Csf1r	3.88316e-11	-0.376187	0.899	0.942	8.24511e-07
Pkig	3.89622e-11	-0.33826	0.429	0.609	8.27285e-07
Ebna1bp2	3.9833e-11	0.33763	0.642	0.503	8.45775e-07
Dbndd2	4.30477e-11	-0.310867	0.251	0.417	9.14032e-07
Ppp1r12b	4.32926e-11	-0.303973	0.103	0.214	9.19233e-07
Asxl1	4.3326e-11	-0.329617	0.301	0.392	9.19941e-07
C3ar1	4.44439e-11	-0.44923	0.857	0.917	9.43677e-07
Mmd	4.46913e-11	-0.307235	0.175	0.299	9.48931e-07
Pvt1	4.58143e-11	-0.342668	0.133	0.204	9.72776e-07
Cops9	4.58674e-11	-0.442166	0.785	0.869	9.73902e-07
Ccl12	4.61167e-11	1.01018	0.611	0.479	9.79196e-07
Tax1bp3	4.7135e-11	-0.315757	0.303	0.455	1.00082e-06
Pstpip2	4.73007e-11	-0.316311	0.086	0.166	1.00434e-06
Fam49a	4.82863e-11	-0.353865	0.229	0.37	1.02526e-06
Phf21a	4.88062e-11	-0.39069	0.322	0.399	1.0363e-06
Syk	4.97481e-11	-0.401453	0.857	0.861	1.0563e-06
Abce1	5.25603e-11	0.298691	0.509	0.376	1.11601e-06
Man1c1	5.64537e-11	-0.405483	0.602	0.66	1.19868e-06
Rack1	5.79443e-11	-0.409566	0.96	0.978	1.23033e-06
Bnip3	5.8208e-11	0.37241	0.37	0.309	1.23593e-06
Rapgef6	6.15588e-11	-0.356334	0.36	0.463	1.30708e-06
Arid5a	6.3799e-11	0.353602	0.512	0.379	1.35464e-06
Bckdha	6.77757e-11	-0.27929	0.206	0.346	1.43908e-06
Eef1e1	6.82211e-11	0.312731	0.472	0.334	1.44854e-06
Fam193a	6.9706e-11	-0.344874	0.396	0.513	1.48007e-06
Csnk1g1	7.12208e-11	-0.322754	0.23	0.349	1.51223e-06
Scmh1	7.23213e-11	-0.297025	0.131	0.238	1.5356e-06
Atf7	7.34196e-11	-0.331301	0.259	0.357	1.55892e-06
Pilra	7.59057e-11	0.449659	0.629	0.551	1.61171e-06
Rnaseh2c	8.08368e-11	-0.355479	0.549	0.651	1.71641e-06
Rps27	8.29112e-11	-0.416731	0.966	0.989	1.76045e-06
Vps13d	8.39464e-11	-0.362475	0.389	0.504	1.78243e-06
Steap3	8.56583e-11	-0.382972	0.33	0.477	1.81878e-06
Oga	8.77667e-11	-0.345427	0.47	0.616	1.86355e-06
Ndufb5	9.06226e-11	-0.390099	0.76	0.845	1.92419e-06
Acer3	9.18877e-11	-0.391502	0.579	0.625	1.95105e-06
Mgst1	9.45748e-11	-0.564635	0.312	0.456	2.00811e-06
Jarid2	1.00389e-10	-0.453076	0.606	0.627	2.13155e-06
Cask	1.15855e-10	-0.314541	0.21	0.29	2.45996e-06
Hsp90aa1	1.18444e-10	0.389865	0.97	0.936	2.51491e-06
Cox4i1	1.22554e-10	-0.387776	0.966	0.976	2.6022e-06
March3	1.23185e-10	-0.294531	0.027	0.103	2.61559e-06
Rpl26	1.24586e-10	-0.379098	0.989	0.996	2.64533e-06
Nolc1	1.28457e-10	0.315566	0.49	0.385	2.72753e-06
Chmp2a	1.30604e-10	0.333227	0.95	0.894	2.77312e-06
Nrg1	1.32957e-10	-0.51088	0.051	0.101	2.82307e-06
Atxn2	1.34599e-10	-0.332012	0.343	0.464	2.85794e-06
Rb1	1.44699e-10	-0.348215	0.402	0.521	3.07239e-06
Cox5a	1.52318e-10	-0.472788	0.815	0.902	3.23416e-06
Ptpro	1.55422e-10	-0.306024	0.27	0.402	3.30008e-06
Dock7	1.55918e-10	-0.351416	0.32	0.431	3.31061e-06
Srsf1	1.56009e-10	0.30395	0.566	0.399	3.31254e-06
Slc12a6	1.57176e-10	-0.364303	0.45	0.539	3.33733e-06
Mms19	1.58433e-10	-0.281416	0.286	0.414	3.36401e-06
Dennd5a	1.634e-10	-0.339345	0.514	0.62	3.46947e-06
Plac8	1.65334e-10	1.11049	0.509	0.234	3.51053e-06
Capg	1.73809e-10	0.505605	0.952	0.886	3.69049e-06
Atf2	1.75139e-10	-0.315801	0.305	0.404	3.71873e-06
Polr2l	1.76274e-10	0.335796	0.577	0.467	3.74283e-06
Sbf2	1.77088e-10	-0.394554	0.385	0.497	3.76011e-06
Rab7	1.77986e-10	0.36702	0.947	0.917	3.77917e-06
Pgls	1.87483e-10	-0.373524	0.771	0.858	3.98083e-06
Eif4a1	1.89017e-10	0.376518	0.985	0.968	4.01339e-06
Rpl32	2.01513e-10	-0.417017	0.99	0.988	4.27872e-06
Gstp1	2.03041e-10	-0.360854	0.29	0.442	4.31116e-06
Nr1d2	2.03311e-10	-0.28103	0.198	0.352	4.31691e-06
Cdkn1a	2.06622e-10	0.458485	0.89	0.787	4.38719e-06
Csrp2	2.08397e-10	-0.264784	0.17	0.308	4.4249e-06
Mtmr14	2.1732e-10	-0.301342	0.23	0.369	4.61435e-06
Fth1	2.18569e-10	-0.547971	1	0.999	4.64088e-06
Fgd2	2.24047e-10	-0.298798	0.259	0.431	4.75719e-06
Hvcn1	2.3219e-10	-0.301978	0.145	0.326	4.93009e-06
Babam2	2.35905e-10	-0.363902	0.522	0.589	5.00898e-06
Itpkb	2.4248e-10	-0.424763	0.726	0.712	5.14858e-06
Rpl3	2.47151e-10	-0.430527	0.977	0.974	5.24775e-06
Sipa1l2	2.64459e-10	-0.334729	0.324	0.42	5.61526e-06
Plk3	2.6482e-10	0.355343	0.434	0.278	5.62292e-06
Ctdsp2	2.70121e-10	-0.316506	0.425	0.557	5.73548e-06
Il10ra	2.71939e-10	-0.340248	0.436	0.574	5.77408e-06
Ass1	2.7565e-10	0.406321	0.282	0.179	5.85287e-06
Fundc2	2.82125e-10	-0.382503	0.541	0.696	5.99037e-06
Apobr	2.86516e-10	0.289395	0.52	0.386	6.08358e-06
Txnip	2.91717e-10	0.429679	0.615	0.447	6.19403e-06
Fyn	2.99851e-10	-0.400765	0.297	0.391	6.36673e-06
Gpatch8	3.07352e-10	-0.325114	0.451	0.54	6.526e-06
Rplp1	3.18039e-10	-0.393374	0.994	0.997	6.75292e-06
Tbc1d12	3.30993e-10	-0.2511	0.105	0.208	7.02798e-06
Rcbtb2	3.51121e-10	-0.407352	0.539	0.71	7.45535e-06
Hnrnpa2b1	3.53068e-10	0.339208	0.958	0.933	7.4967e-06
Ncoa2	3.56257e-10	-0.362537	0.352	0.43	7.5644e-06
Fchsd2	3.64433e-10	-0.327618	0.164	0.264	7.738e-06
Cblb	3.75677e-10	-0.566097	0.305	0.359	7.97675e-06
Cdk19	3.94917e-10	-0.273163	0.189	0.314	8.38528e-06
Prkn	3.97693e-10	-0.328092	0.006	0.108	8.44422e-06
Spcs1	4.00146e-10	-0.415908	0.6	0.786	8.4963e-06
Aldoa	4.14386e-10	0.457176	0.971	0.935	8.79866e-06
Tm2d2	4.15178e-10	-0.360884	0.568	0.675	8.81547e-06
Fubp1	4.3628e-10	0.314781	0.731	0.652	9.26353e-06
Rassf4	4.60377e-10	-0.379008	0.579	0.695	9.77519e-06
Inhba	4.62677e-10	0.290776	0.105	0.074	9.82402e-06
Slc26a11	4.66635e-10	-0.301701	0.215	0.354	9.90805e-06
Runx2	4.72964e-10	-0.307559	0.099	0.177	1.00424e-05
Cd63	4.78223e-10	-0.638102	0.775	0.865	1.01541e-05
Pdlim4	4.89809e-10	-0.360035	0.417	0.575	1.04001e-05
Hnrnpu	5.02033e-10	0.317012	0.924	0.884	1.06597e-05
Tmem50a	5.25465e-10	-0.352403	0.851	0.91	1.11572e-05
Fkbp5	5.31031e-10	0.253415	0.411	0.243	1.12754e-05
Ddx54	5.42628e-10	0.291657	0.709	0.606	1.15216e-05
Ube2e2	5.54075e-10	-0.29303	0.04	0.1	1.17647e-05
Siglec1	5.62514e-10	0.30146	0.349	0.222	1.19439e-05
Rufy3	5.65275e-10	-0.380032	0.484	0.564	1.20025e-05
Pip4k2a	5.80686e-10	-0.367196	0.552	0.652	1.23297e-05
Uck2	6.02426e-10	0.319917	0.356	0.208	1.27913e-05
Ms4a4a	6.31269e-10	-0.258195	0.101	0.195	1.34037e-05
Tppp3	6.40135e-10	0.558635	0.341	0.239	1.3592e-05
Usp3	6.94103e-10	-0.318419	0.345	0.468	1.47379e-05
Tpm3	7.12027e-10	0.335007	0.973	0.953	1.51185e-05
Mob2	7.25999e-10	-0.279122	0.286	0.401	1.54151e-05
Pkp4	7.47023e-10	-0.342274	0.171	0.254	1.58615e-05
Fuca1	7.63599e-10	-0.36232	0.741	0.805	1.62135e-05
Stx8	8.05614e-10	-0.351767	0.598	0.699	1.71056e-05
Pibf1	8.22525e-10	-0.275206	0.177	0.287	1.74647e-05
Zfc3h1	8.53353e-10	-0.361618	0.503	0.537	1.81192e-05
Rhob	8.88553e-10	0.423512	0.758	0.678	1.88666e-05
Bmt2	9.295e-10	-0.313592	0.269	0.381	1.97361e-05
2210408F21Rik	9.4057e-10	-0.256408	0.09	0.182	1.99711e-05
Rpl15	9.62445e-10	-0.396544	0.971	0.977	2.04356e-05
Arhgap6	9.6389e-10	-0.390102	0.145	0.193	2.04663e-05
Gsr	9.69916e-10	0.447441	0.505	0.408	2.05942e-05
Rabgap1l	9.88967e-10	-0.288841	0.128	0.211	2.09987e-05
Kmt2c	1.03335e-09	-0.326662	0.423	0.523	2.19412e-05
Acbd5	1.04426e-09	-0.301162	0.366	0.517	2.21728e-05
Leng8	1.06983e-09	0.254746	0.552	0.43	2.27157e-05
Furin	1.07801e-09	0.367273	0.802	0.778	2.28894e-05
Use1	1.09153e-09	-0.320146	0.752	0.821	2.31764e-05
AA467197	1.09935e-09	0.936537	0.4	0.295	2.33426e-05
Gmip	1.11251e-09	-0.275676	0.408	0.531	2.36219e-05
Map2k4	1.134e-09	-0.313088	0.37	0.445	2.40781e-05
Ankrd44	1.15482e-09	-0.368029	0.503	0.567	2.45202e-05
Rfx7	1.15874e-09	-0.276574	0.177	0.291	2.46035e-05
Nenf	1.18495e-09	-0.344397	0.539	0.674	2.51601e-05
Atp11c	1.19654e-09	-0.296311	0.183	0.273	2.54062e-05
Khsrp	1.21174e-09	0.268966	0.541	0.435	2.57289e-05
Psme4	1.23957e-09	-0.358007	0.465	0.535	2.63197e-05
Rsf1	1.25603e-09	-0.304105	0.362	0.487	2.66693e-05
Pum3	1.30009e-09	0.289194	0.526	0.408	2.76049e-05
Tbc1d9	1.30203e-09	-0.382424	0.44	0.551	2.76459e-05
Trip12	1.32816e-09	-0.380166	0.72	0.745	2.82009e-05
Ly6c2	1.34616e-09	0.850903	0.305	0.101	2.8583e-05
Actr2	1.41127e-09	0.326278	0.949	0.932	2.99654e-05
4931406P16Rik	1.4951e-09	-0.275834	0.229	0.348	3.17454e-05
Cstf3	1.51172e-09	-0.28623	0.234	0.331	3.20984e-05
P2rx4	1.53128e-09	-0.367706	0.75	0.808	3.25136e-05
Tle5	1.5642e-09	-0.377027	0.886	0.907	3.32127e-05
Rbm6	1.5755e-09	-0.330451	0.491	0.54	3.34525e-05
Dst	1.62286e-09	-0.434577	0.177	0.274	3.44581e-05
Eef1b2	1.64166e-09	-0.394538	0.903	0.954	3.48573e-05
Bak1	1.66935e-09	0.32711	0.741	0.593	3.54453e-05
Arl5c	1.68761e-09	-0.363695	0.143	0.253	3.5833e-05
Supt4a	1.72569e-09	-0.326009	0.703	0.789	3.66416e-05
Pld3	1.77651e-09	-0.472159	0.726	0.77	3.77206e-05
Rpl39	1.79165e-09	-0.384156	0.983	0.991	3.80421e-05
Plcl1	1.79757e-09	-0.324868	0.051	0.111	3.81679e-05
Mtmr3	1.81326e-09	-0.319373	0.448	0.521	3.8501e-05
Rab9	1.84136e-09	-0.316965	0.345	0.469	3.90977e-05
Tent4b	1.8855e-09	-0.302696	0.227	0.305	4.00348e-05
Ptpn18	1.90881e-09	-0.368135	0.909	0.944	4.05298e-05
Klhdc4	2.03465e-09	0.271043	0.438	0.309	4.32017e-05
Slc41a2	2.05937e-09	-0.341845	0.253	0.301	4.37265e-05
Snrpf	2.0802e-09	0.337605	0.897	0.867	4.41689e-05
Ldha	2.08705e-09	0.436699	0.935	0.902	4.43144e-05
Xpr1	2.16183e-09	-0.362856	0.442	0.525	4.59021e-05
Lyn	2.18413e-09	-0.390493	0.882	0.9	4.63755e-05
Fbxw7	2.2201e-09	-0.350577	0.387	0.47	4.71394e-05
Abi3	2.24171e-09	-0.331907	0.322	0.466	4.75983e-05
Ano6	2.26542e-09	-0.374897	0.589	0.612	4.81017e-05
Fam13b	2.28605e-09	-0.302123	0.291	0.392	4.85397e-05
Kdm6b	2.38146e-09	0.370752	0.779	0.644	5.05655e-05
Samd1	2.38699e-09	0.253976	0.41	0.305	5.0683e-05
Gas6	2.42936e-09	-0.578994	0.413	0.643	5.15825e-05
Ip6k1	2.45527e-09	-0.289396	0.398	0.505	5.21327e-05
Ftl1-ps1	2.46419e-09	-0.402043	0.686	0.768	5.23222e-05
Pdpn	2.46543e-09	0.663919	0.64	0.499	5.23485e-05
Ppp3ca	2.58108e-09	-0.377769	0.718	0.749	5.48041e-05
Irf8	2.6352e-09	-0.351714	0.752	0.811	5.59531e-05
Cct3	2.7304e-09	0.341078	0.813	0.73	5.79747e-05
Cap1	2.74662e-09	0.329771	0.903	0.843	5.8319e-05
Wdfy2	2.74676e-09	-0.352717	0.411	0.501	5.83219e-05
Tbl1xr1	2.79949e-09	-0.311671	0.427	0.525	5.94415e-05
Sdccag8	2.82712e-09	-0.281542	0.238	0.355	6.00282e-05
Fxyd5	2.85262e-09	0.349068	0.979	0.967	6.05698e-05
Spata5	2.87857e-09	-0.250693	0.16	0.252	6.11206e-05
Setd5	2.88649e-09	-0.319525	0.381	0.459	6.12888e-05
Srm	2.90586e-09	0.323912	0.417	0.281	6.17001e-05
Kxd1	2.91245e-09	-0.307852	0.495	0.615	6.18399e-05
Gltp	2.91538e-09	-0.359014	0.827	0.876	6.19024e-05
Med13l	2.96329e-09	-0.340008	0.535	0.584	6.29196e-05
Actn4	2.98151e-09	0.338244	0.798	0.741	6.33064e-05
Vrk2	3.00315e-09	-0.300648	0.316	0.403	6.37659e-05
Rapsn	3.04554e-09	-0.265772	0.084	0.219	6.4666e-05
Fam219a	3.05726e-09	-0.359417	0.248	0.301	6.49148e-05
Hmgn1	3.21099e-09	-0.399226	0.415	0.602	6.8179e-05
Scaf8	3.21455e-09	-0.325245	0.389	0.439	6.82546e-05
Atp7a	3.31863e-09	-0.343107	0.345	0.445	7.04644e-05
Ranbp10	3.32392e-09	-0.30497	0.307	0.377	7.05767e-05
St6gal1	3.3855e-09	-0.342094	0.337	0.475	7.18843e-05
Prpf8	3.43658e-09	0.27947	0.678	0.579	7.29689e-05
Ormdl2	3.46089e-09	-0.300331	0.411	0.56	7.34851e-05
Ccnb2	3.48572e-09	-0.289662	0.029	0.104	7.40123e-05
Tmem65	3.49413e-09	-0.390415	0.589	0.654	7.41908e-05
Cwc27	3.51166e-09	-0.301597	0.255	0.326	7.4563e-05
Wac	3.52263e-09	-0.314013	0.543	0.61	7.47959e-05
Fabp5	3.54754e-09	-0.913225	0.688	0.822	7.5325e-05
Tbc1d15	3.54791e-09	-0.313849	0.423	0.536	7.53328e-05
Notch2	3.57623e-09	-0.361144	0.482	0.524	7.5934e-05
Cebpzos	3.63514e-09	-0.315074	0.368	0.497	7.71849e-05
Fcgrt	3.71277e-09	-0.480736	0.331	0.609	7.88333e-05
Wipf1	3.71319e-09	-0.370071	0.581	0.643	7.88421e-05
Psmd3	3.79433e-09	0.310596	0.69	0.631	8.0565e-05
Rps27a	3.79539e-09	-0.383213	0.987	0.994	8.05874e-05
Irf2bp2	3.8007e-09	0.311226	0.886	0.811	8.07003e-05
Midn	3.80108e-09	0.292942	0.507	0.39	8.07083e-05
Rtn4	3.81797e-09	-0.369152	0.916	0.941	8.10669e-05
Pja2	3.98326e-09	-0.271645	0.227	0.365	8.45765e-05
Parp3	4.084e-09	0.252539	0.362	0.255	8.67156e-05
Eef1a1	4.1786e-09	-0.372909	0.994	0.996	8.87242e-05
Cd302	4.30547e-09	-0.372309	0.503	0.665	9.1418e-05
Rit1	4.3496e-09	-0.318658	0.453	0.551	9.23551e-05
Tspan4	4.38671e-09	-0.382701	0.436	0.591	9.3143e-05
Dapk1	4.38971e-09	-0.38085	0.328	0.398	9.32067e-05
Kansl1l	4.63884e-09	-0.298367	0.227	0.331	9.84964e-05
Rapgef5	4.69288e-09	-0.286778	0.05	0.116	9.96439e-05
Bcl2l1	4.86274e-09	0.357004	0.737	0.613	0.000103251
Adam17	4.91582e-09	-0.322478	0.682	0.762	0.000104378
Skap2	4.93672e-09	-0.35297	0.832	0.874	0.000104821
Tuba1a	5.02877e-09	0.408153	0.509	0.424	0.000106776
Hspa1a	5.0605e-09	0.449874	0.284	0.184	0.00010745
Saa3	5.08219e-09	1.28435	0.152	0.077	0.00010791
Upf1	5.24484e-09	0.250429	0.461	0.332	0.000111364
Smad2	5.28787e-09	-0.274507	0.352	0.458	0.000112277
Evl	5.31034e-09	-0.402006	0.602	0.703	0.000112754
Ccdc86	5.38711e-09	0.298691	0.575	0.423	0.000114385
Mtmr12	5.47818e-09	-0.266766	0.17	0.283	0.000116318
Gclc	5.48496e-09	-0.513433	0.36	0.391	0.000116462
Tmem192	5.6149e-09	-0.308969	0.459	0.583	0.000119221
Sirpa	5.972e-09	-0.349439	0.949	0.953	0.000126803
Togaram1	6.05542e-09	-0.25822	0.221	0.328	0.000128575
Noc2l	6.09498e-09	0.279276	0.617	0.534	0.000129415
Sord	6.175e-09	-0.25832	0.179	0.312	0.000131114
Fos	6.32845e-09	-0.476111	0.874	0.923	0.000134372
Rab12	6.5941e-09	-0.298442	0.375	0.481	0.000140013
Tent2	6.64548e-09	-0.279405	0.467	0.565	0.000141103
Pdcd4	6.68293e-09	-0.254378	0.166	0.297	0.000141899
Ttyh2	6.79682e-09	-0.287782	0.154	0.3	0.000144317
Sh3glb1	6.79712e-09	-0.334737	0.95	0.944	0.000144323
Rpl12	7.01458e-09	-0.382602	0.977	0.982	0.000148941
S1pr2	7.12105e-09	-0.273385	0.221	0.371	0.000151201
Atpif1	7.13562e-09	-0.388269	0.907	0.944	0.000151511
Rap1gds1	7.32553e-09	-0.320556	0.48	0.556	0.000155543
Mt1	7.40272e-09	0.459206	0.973	0.97	0.000157182
Cep120	7.40326e-09	-0.276728	0.25	0.34	0.000157193
Chmp4b	7.50681e-09	0.312683	0.937	0.912	0.000159392
Crybg3	7.57978e-09	-0.316779	0.301	0.397	0.000160941
Apobec3	8.11812e-09	-0.301391	0.331	0.452	0.000172372
Nrf1	8.45456e-09	-0.295108	0.28	0.388	0.000179516
Igfbp4	8.521e-09	-0.462844	0.257	0.442	0.000180926
Vps37b	8.52436e-09	0.346856	0.573	0.412	0.000180998
Zfas1	8.59502e-09	-0.314414	0.383	0.506	0.000182498
Tnks	8.73344e-09	-0.295122	0.333	0.395	0.000185437
Aars	8.84094e-09	0.283243	0.543	0.419	0.00018772
Mir22hg	8.99553e-09	0.297823	0.712	0.659	0.000191002
Dmxl1	9.09229e-09	-0.402791	0.592	0.613	0.000193057
Iqgap2	9.13693e-09	-0.369136	0.543	0.647	0.000194004
Ybx3	9.31509e-09	0.346256	0.691	0.586	0.000197787
Nfe2l2	9.33083e-09	-0.33313	0.806	0.868	0.000198121
Susd6	9.78532e-09	-0.343764	0.554	0.599	0.000207772
Kidins220	1.01691e-08	-0.298954	0.373	0.468	0.00021592
Slc17a5	1.0607e-08	-0.32224	0.343	0.442	0.000225218
Phactr2	1.08252e-08	-0.307696	0.328	0.408	0.000229852
Ddx27	1.10136e-08	0.272358	0.461	0.353	0.000233852
Rps3	1.14314e-08	-0.372978	0.977	0.986	0.000242723
Dusp5	1.21367e-08	0.357499	0.585	0.443	0.000257699
Ptgs2	1.24729e-08	0.512967	0.305	0.209	0.000264836
Atp5g2	1.26662e-08	-0.364546	0.905	0.924	0.000268942
Ptprc	1.28733e-08	-0.31623	0.886	0.92	0.000273338
Lipa	1.30314e-08	-0.45118	0.794	0.862	0.000276695
Ufc1	1.30716e-08	-0.31773	0.648	0.77	0.00027755
Rps16	1.38295e-08	-0.338644	0.998	0.995	0.000293643
Ddrgk1	1.39866e-08	-0.310496	0.583	0.71	0.000296977
Rnf217	1.44817e-08	-0.274808	0.124	0.204	0.00030749
Akap13	1.45496e-08	-0.363697	0.832	0.882	0.000308932
Tyrobp	1.49533e-08	-0.364777	0.987	0.986	0.000317504
Chd6	1.54802e-08	-0.277822	0.278	0.394	0.00032869
Map1lc3a	1.60302e-08	-0.273727	0.343	0.478	0.000340368
Adam19	1.6252e-08	-0.314194	0.095	0.195	0.000345078
Lrg1	1.66287e-08	0.253533	0.16	0.09	0.000353078
Rapgef1	1.67445e-08	-0.304672	0.358	0.407	0.000355537
Prdx2	1.67882e-08	-0.3662	0.806	0.881	0.000356464
Gm17749	1.75435e-08	-0.29256	0.105	0.175	0.000372501
Mt2	1.78563e-08	0.633333	0.659	0.616	0.000379143
Pink1	1.79447e-08	-0.262939	0.261	0.408	0.000381019
Pon2	1.81163e-08	-0.344277	0.535	0.648	0.000384663
Galc	1.83531e-08	-0.305474	0.364	0.502	0.000389691
Pla2g15	1.84977e-08	-0.320534	0.499	0.592	0.000392761
Clec4a1	1.85047e-08	-0.36125	0.646	0.77	0.000392911
Eif4ebp1	1.85899e-08	0.335301	0.819	0.754	0.00039472
Gnl3	1.85945e-08	0.298443	0.678	0.558	0.000394817
Slc25a4	1.92894e-08	-0.372249	0.665	0.783	0.000409573
Pikfyve	2.01849e-08	-0.281469	0.349	0.434	0.000428586
Tubb4b	2.03395e-08	0.382619	0.667	0.564	0.00043187
Lrp12	2.16403e-08	-0.429057	0.478	0.484	0.000459488
Lims1	2.18366e-08	-0.350366	0.646	0.679	0.000463657
Zfp652	2.18806e-08	-0.273921	0.261	0.34	0.000464591
Grb2	2.224e-08	-0.314875	0.918	0.938	0.000472223
Rab20	2.29948e-08	0.319741	0.777	0.674	0.00048825
Eif3f	2.33908e-08	-0.315022	0.901	0.922	0.000496658
Rps11	2.375e-08	-0.32767	0.989	0.994	0.000504283
Arfgef2	2.48457e-08	-0.285356	0.293	0.389	0.000527549
Irf7	2.49038e-08	0.604794	0.665	0.438	0.000528781
Gapdh	2.52628e-08	0.408528	0.977	0.973	0.000536406
Apc	2.53709e-08	-0.282118	0.345	0.411	0.0005387
Lamc1	2.57034e-08	-0.37839	0.432	0.463	0.000545761
Slc7a8	2.58803e-08	0.344669	0.798	0.71	0.000549516
Cnpy2	2.6727e-08	-0.32763	0.589	0.708	0.000567495
Ube2h	2.71283e-08	-0.305759	0.398	0.485	0.000576016
Ptges3	2.78071e-08	0.301131	0.848	0.762	0.000590429
Abtb2	2.79143e-08	-0.345058	0.124	0.151	0.000592704
Mrpl28	2.80339e-08	-0.324601	0.547	0.683	0.000595244
Ankrd12	2.86731e-08	-0.376154	0.655	0.709	0.000608816
Slc22a4	2.9264e-08	-0.26577	0.103	0.172	0.000621362
Ube2r2	3.05908e-08	-0.316035	0.589	0.699	0.000649535
Higd1a	3.13145e-08	0.327128	0.754	0.717	0.000664902
Il4ra	3.3098e-08	0.356878	0.851	0.774	0.000702769
Eif3g	3.32867e-08	0.274559	0.724	0.65	0.000706776
Herc1	3.34309e-08	-0.286337	0.402	0.517	0.000709838
Zfp148	3.36744e-08	-0.283359	0.364	0.46	0.000715008
Lonrf3	3.42922e-08	-0.305333	0.189	0.259	0.000728126
Eif3b	3.46892e-08	0.30935	0.733	0.681	0.000736557
Aplp2	3.56442e-08	-0.358093	0.735	0.786	0.000756834
Flna	3.61021e-08	0.356641	0.855	0.795	0.000766557
Gpx3	3.6569e-08	-0.320322	0.177	0.308	0.000776471
Tomm40	3.72271e-08	0.277697	0.625	0.527	0.000790444
Ccl4	3.82081e-08	0.82644	0.667	0.514	0.000811273
Cog5	3.85645e-08	-0.282062	0.257	0.327	0.00081884
Smim4	3.96289e-08	-0.266482	0.349	0.487	0.000841441
Hcls1	3.99387e-08	0.272177	0.878	0.833	0.000848019
Ubn2	4.14556e-08	-0.301331	0.507	0.578	0.000880226
Ythdf3	4.23304e-08	-0.302255	0.512	0.553	0.0008988
Carhsp1	4.31458e-08	0.288122	0.581	0.512	0.000916114
Acbd6	4.36807e-08	-0.271699	0.495	0.634	0.000927473
Gdpd1	4.37397e-08	-0.250332	0.139	0.252	0.000928726
Dnajb14	4.67844e-08	-0.296815	0.535	0.646	0.000993373
Acap2	4.70347e-08	-0.33572	0.531	0.55	0.000998687
Crebrf	4.70575e-08	-0.29567	0.295	0.382	0.000999171
Ptpre	5.07662e-08	0.348873	0.781	0.673	0.00107792
1810013L24Rik	5.31149e-08	-0.298471	0.432	0.508	0.00112779
Hmgn2	5.31776e-08	-0.324943	0.408	0.518	0.00112912
Slfn1	5.42709e-08	0.351432	0.333	0.155	0.00115233
Csf1	5.43011e-08	0.379704	0.16	0.105	0.00115298
Sdc4	5.52257e-08	0.390523	0.84	0.757	0.00117261
Rpl22	5.68325e-08	-0.325403	0.983	0.982	0.00120672
Msn	5.74638e-08	0.299846	0.95	0.938	0.00122013
Rps23	5.86552e-08	-0.336449	0.979	0.992	0.00124543
Dnmt3a	5.86559e-08	-0.372719	0.507	0.594	0.00124544
Ms4a4c	5.86816e-08	0.676638	0.503	0.392	0.00124599
Cd84	5.96039e-08	-0.35831	0.823	0.851	0.00126557
Snrpd3	6.11141e-08	0.294304	0.783	0.695	0.00129764
Svbp	6.27914e-08	-0.296713	0.556	0.693	0.00133325
Gamt	6.50783e-08	-0.25859	0.248	0.378	0.00138181
Clec2d	6.6129e-08	-0.278371	0.326	0.485	0.00140412
Dpm3	6.79872e-08	-0.292917	0.63	0.724	0.00144357
Ntpcr	6.92092e-08	-0.346907	0.539	0.661	0.00146952
Capn2	7.05475e-08	0.302766	0.81	0.739	0.00149794
Slc9a3r1	7.24531e-08	0.33657	0.762	0.637	0.0015384
Rhoq	7.27561e-08	-0.265336	0.328	0.43	0.00154483
Rpl11	7.38525e-08	-0.319719	0.99	0.995	0.00156811
Gab1	7.42517e-08	-0.416783	0.394	0.365	0.00157659
Magoh	7.53343e-08	0.261761	0.682	0.611	0.00159957
Dennd4a	7.53683e-08	-0.423636	0.747	0.721	0.0016003
Tubb6	7.57393e-08	0.326676	0.802	0.742	0.00160817
Stam2	7.66722e-08	-0.313463	0.474	0.523	0.00162798
Sdc3	7.66902e-08	0.318236	0.924	0.877	0.00162836
Clec4a3	7.68566e-08	-0.337391	0.665	0.79	0.0016319
Ebpl	7.90124e-08	-0.268294	0.316	0.47	0.00167767
Zyx	7.91596e-08	0.342754	0.83	0.746	0.0016808
Azin1	8.379e-08	0.323624	0.823	0.723	0.00177911
Tnfaip8	8.49117e-08	-0.33334	0.712	0.786	0.00180293
Rpl28	8.52014e-08	-0.309689	0.994	0.991	0.00180908
Slc11a2	8.53697e-08	-0.2856	0.337	0.443	0.00181265
Dync1i2	8.61014e-08	0.299779	0.876	0.826	0.00182819
Slc39a14	8.80402e-08	0.280874	0.48	0.351	0.00186936
Il17ra	8.85568e-08	0.281046	0.554	0.413	0.00188033
Gnas	9.03675e-08	-0.323113	0.945	0.967	0.00191877
Vegfb	9.09853e-08	-0.261304	0.213	0.36	0.00193189
Zdhhc20	9.14968e-08	-0.290291	0.495	0.597	0.00194275
Smpdl3a	9.30778e-08	-0.400248	0.63	0.769	0.00197632
Smad7	9.43913e-08	0.266408	0.406	0.254	0.00200421
Arih2	9.6416e-08	-0.280494	0.518	0.55	0.0020472
Slmap	9.69306e-08	-0.274585	0.331	0.415	0.00205813
Trim8	9.78814e-08	0.261727	0.636	0.524	0.00207832
Lcp2	9.82901e-08	-0.289543	0.545	0.621	0.00208699
Pilrb2	9.93922e-08	0.269178	0.284	0.191	0.00211039
Ppfibp1	1.0102e-07	-0.251816	0.194	0.309	0.00214496
Npm3	1.01105e-07	0.276894	0.531	0.429	0.00214676
Tpm4	1.01846e-07	0.313387	0.88	0.82	0.00216249
Srsf6	1.03205e-07	0.264022	0.787	0.71	0.00219136
Clec4e	1.03896e-07	0.515357	0.564	0.445	0.00220602
Aldh2	1.11029e-07	-0.367274	0.83	0.885	0.00235747
Malat1	1.12167e-07	0.356233	0.99	0.986	0.00238164
St3gal5	1.13182e-07	0.303341	0.364	0.23	0.0024032
Rilpl2	1.2634e-07	-0.39696	0.73	0.805	0.00268258
Rpl34	1.28971e-07	-0.332811	0.987	0.988	0.00273844
Serpine1	1.29835e-07	0.294747	0.204	0.161	0.00275678
Eif4g3	1.30774e-07	-0.290117	0.606	0.694	0.00277671
Mpp7	1.332e-07	-0.439542	0.335	0.389	0.00282824
AY036118	1.37533e-07	0.283941	0.851	0.798	0.00292023
Cerk	1.38351e-07	-0.31999	0.71	0.758	0.0029376
Dtnbp1	1.41429e-07	-0.360355	0.735	0.8	0.00300296
Vkorc1	1.43549e-07	-0.252502	0.265	0.443	0.00304797
Llph	1.5593e-07	0.281075	0.85	0.816	0.00331086
Ndufs2	1.56321e-07	-0.287716	0.678	0.769	0.00331917
Mfsd11	1.57552e-07	-0.293737	0.44	0.555	0.00334531
Sparc	1.61881e-07	-0.384781	0.303	0.619	0.00343722
Tnfrsf12a	1.65019e-07	0.266635	0.39	0.268	0.00350384
Itgb7	1.66384e-07	0.367396	0.39	0.229	0.00353284
Pcbp1	1.67612e-07	0.256955	0.91	0.884	0.0035589
Arrdc4	1.69621e-07	0.257129	0.438	0.354	0.00360156
Bcap31	1.73322e-07	-0.326402	0.682	0.782	0.00368014
Nupr1	1.76541e-07	0.316669	0.457	0.364	0.00374849
Sh3bp5	1.78023e-07	-0.34015	0.535	0.568	0.00377997
Axl	1.78404e-07	-0.359265	0.238	0.409	0.00378805
Pim3	1.83799e-07	0.284099	0.453	0.364	0.0039026
Map4k4	1.86676e-07	-0.349574	0.798	0.796	0.0039637
Kcmf1	1.89597e-07	-0.281298	0.661	0.695	0.00402571
Ndufa6	1.91461e-07	-0.290348	0.785	0.872	0.0040653
Ptbp2	1.91859e-07	-0.250119	0.339	0.414	0.00407373
Map1lc3b	1.92487e-07	-0.310331	0.903	0.918	0.00408707
Plekhm3	1.95951e-07	-0.317103	0.524	0.497	0.00416062
Dcn	1.96302e-07	-0.333937	0.322	0.36	0.00416807
Mfge8	1.96478e-07	-0.515988	0.183	0.201	0.00417181
Mib1	2.01004e-07	-0.270878	0.429	0.514	0.00426791
Cd83	2.02294e-07	-0.473642	0.526	0.711	0.0042953
Akt1	2.05312e-07	0.264735	0.848	0.793	0.00435939
Lst1	2.06078e-07	-0.348572	0.874	0.935	0.00437565
Ptk2b	2.09697e-07	-0.291057	0.52	0.627	0.0044525
Cbl	2.10843e-07	-0.322369	0.623	0.708	0.00447683
Jund	2.21481e-07	0.31355	0.962	0.962	0.0047027
Tuba4a	2.28771e-07	0.265394	0.459	0.342	0.00485749
Rabgap1	2.29813e-07	-0.251659	0.322	0.408	0.00487962
Acvrl1	2.29922e-07	-0.254974	0.39	0.544	0.00488194
Tnfrsf11a	2.30916e-07	-0.321069	0.579	0.611	0.00490304
Asap1	2.35123e-07	-0.330101	0.648	0.676	0.00499238
Ndfip1	2.38558e-07	-0.300554	0.775	0.853	0.00506531
Rabac1	2.41675e-07	-0.297869	0.804	0.856	0.00513148
Atf6	2.46587e-07	-0.302674	0.53	0.545	0.00523577
R3hdm2	2.57655e-07	-0.259736	0.512	0.589	0.0054708
Stx4a	2.57788e-07	0.272826	0.815	0.73	0.00547362
Aig1	2.58971e-07	-0.301361	0.27	0.374	0.00549874
Rplp2	2.60011e-07	-0.31018	0.987	0.991	0.00552081
Lacc1	2.64514e-07	-0.260571	0.39	0.494	0.00561642
Sh3bgrl3	2.67593e-07	-0.361714	0.971	0.975	0.00568179
Kpna3	2.68558e-07	-0.277763	0.421	0.479	0.0057023
Mxi1	2.70017e-07	-0.373504	0.606	0.61	0.00573327
Sumo1	2.75591e-07	-0.281616	0.642	0.761	0.00585163
Lrch3	2.82748e-07	-0.263632	0.255	0.331	0.0060036
Cox6c	2.86495e-07	-0.336071	0.952	0.955	0.00608315
Nrros	2.94887e-07	-0.302612	0.787	0.828	0.00626133
Dnajc1	3.03518e-07	-0.302368	0.432	0.501	0.0064446
Zc3h12c	3.09959e-07	-0.254477	0.133	0.183	0.00658135
Slc15a3	3.11805e-07	0.302499	0.916	0.881	0.00662055
Nxpe5	3.13069e-07	-0.353103	0.476	0.618	0.00664738
Gpi1	3.16002e-07	0.310843	0.91	0.914	0.00670966
Ncl	3.16158e-07	0.282357	0.945	0.935	0.00671298
0610012G03Rik	3.28842e-07	-0.324123	0.72	0.766	0.0069823
Birc6	3.29835e-07	-0.305396	0.65	0.661	0.00700338
Fcho2	3.31086e-07	-0.295314	0.629	0.628	0.00702994
Tbc1d23	3.46918e-07	-0.301349	0.484	0.54	0.00736612
Pdlim5	3.57039e-07	-0.329275	0.514	0.585	0.007581
1810058I24Rik	3.57262e-07	-0.317262	0.79	0.851	0.00758575
Tsc22d4	3.71928e-07	0.263231	0.83	0.793	0.00789715
Asxl2	3.9026e-07	-0.262742	0.362	0.469	0.00828639
Cacul1	3.98096e-07	-0.286938	0.522	0.585	0.00845276
Pdlim7	4.09501e-07	0.260038	0.415	0.311	0.00869493
Prr13	4.36111e-07	-0.324742	0.754	0.814	0.00925994
Rtraf	4.36572e-07	-0.301954	0.722	0.845	0.00926973
Mvp	4.50651e-07	0.253252	0.842	0.786	0.00956868
Dnajb6	4.5241e-07	-0.265011	0.775	0.796	0.00960603
Rnh1	4.55886e-07	0.385173	0.945	0.903	0.00967983
Bmpr2	4.5657e-07	-0.251525	0.299	0.393	0.00969435
Bad	4.61215e-07	-0.257216	0.364	0.481	0.00979298
Mrpl54	4.68829e-07	0.270563	0.855	0.815	0.00995465
Zfhx3	4.73683e-07	-0.288267	0.427	0.546	0.0100577
Cd180	4.73827e-07	-0.325546	0.665	0.725	0.0100608
Ptbp1	4.99002e-07	0.257275	0.745	0.654	0.0105953
Tm9sf2	5.02795e-07	-0.26128	0.514	0.634	0.0106758
Dctpp1	5.08572e-07	-0.254756	0.36	0.501	0.0107985
Mcu	5.1643e-07	-0.259388	0.202	0.234	0.0109654
Il1a	5.17479e-07	0.336653	0.152	0.059	0.0109876
Ubl5	5.2279e-07	-0.305897	0.916	0.932	0.0111004
Kitl	5.31574e-07	-0.313994	0.055	0.102	0.0112869
Uqcc3	5.3732e-07	-0.251991	0.503	0.602	0.0114089
Necap2	5.37953e-07	-0.285435	0.705	0.784	0.0114224
mt-Co3	5.50688e-07	-0.306475	0.981	0.994	0.0116928
Hyou1	6.10836e-07	0.261886	0.53	0.419	0.0129699
Pik3c2a	6.19581e-07	-0.285564	0.429	0.468	0.0131556
Metap2	6.42018e-07	0.270054	0.867	0.831	0.013632
Cttnbp2nl	6.49203e-07	-0.264451	0.486	0.581	0.0137845
Plekhm2	6.73118e-07	-0.300263	0.701	0.674	0.0142923
Hist1h2ap	6.94389e-07	-0.285836	0.19	0.334	0.014744
Hilpda	6.94995e-07	0.516745	0.771	0.662	0.0147568
Eif3k	7.22661e-07	-0.274292	0.888	0.923	0.0153443
Hgf	7.25186e-07	-0.269411	0.229	0.303	0.0153979
Atad2b	7.35967e-07	-0.257493	0.408	0.448	0.0156268
Nsf	7.43776e-07	-0.302419	0.672	0.678	0.0157926
Uhrf2	7.55887e-07	-0.346329	0.659	0.691	0.0160497
Ap3b1	7.56054e-07	-0.282278	0.632	0.669	0.0160533
Npc2	7.58014e-07	-0.311226	0.987	0.975	0.0160949
Ranbp1	7.60861e-07	0.324606	0.851	0.798	0.0161554
Herc4	7.69805e-07	-0.251078	0.377	0.456	0.0163453
Pde8a	7.70082e-07	-0.275311	0.33	0.397	0.0163511
Syne1	7.91379e-07	-0.300562	0.23	0.299	0.0168033
mt-Atp6	7.97565e-07	-0.295684	0.983	0.991	0.0169347
Nrp1	8.08837e-07	-0.373916	0.697	0.74	0.017174
Gpnmb	8.57181e-07	-0.802264	0.478	0.614	0.0182005
Ddhd1	8.7734e-07	-0.339558	0.354	0.392	0.0186286
Ggh	9.22636e-07	-0.283017	0.577	0.686	0.0195903
Ubald2	9.35144e-07	0.257971	0.733	0.692	0.0198559
Ascc3	9.71885e-07	-0.309407	0.608	0.56	0.020636
Bri3	9.73838e-07	-0.321244	0.928	0.951	0.0206775
Swap70	9.7468e-07	-0.264114	0.45	0.511	0.0206954
Arhgap17	1.00136e-06	-0.274571	0.707	0.762	0.0212619
Cst3	1.01002e-06	-0.288349	0.994	0.986	0.0214457
Picalm	1.03597e-06	-0.277851	0.945	0.95	0.0219968
Rps19	1.05546e-06	-0.288681	0.994	0.995	0.0224106
Sod1	1.05554e-06	0.257496	0.81	0.801	0.0224123
Zbp1	1.06334e-06	0.349353	0.512	0.38	0.0225779
Myo1f	1.07245e-06	-0.294089	0.783	0.813	0.0227713
Rps21	1.12722e-06	-0.297818	0.985	0.991	0.0239342
Fosl2	1.16625e-06	0.25731	0.745	0.616	0.0247629
Snx8	1.17203e-06	-0.29077	0.598	0.69	0.0248856
Myadm	1.19242e-06	0.289564	0.659	0.605	0.0253188
Lpp	1.21437e-06	-0.334757	0.566	0.573	0.0257847
Adam8	1.25406e-06	0.418217	0.891	0.782	0.0266275
Set	1.26278e-06	0.28639	0.903	0.849	0.0268126
Mtmr10	1.30067e-06	-0.350173	0.556	0.594	0.0276171
Ndufc2	1.31816e-06	-0.283598	0.813	0.871	0.0279885
Katnbl1	1.48745e-06	-0.287161	0.362	0.413	0.0315831
Golgb1	1.49373e-06	-0.261513	0.463	0.582	0.0317164
Nr3c1	1.51958e-06	-0.262589	0.52	0.579	0.0322653
Rnf115	1.60035e-06	-0.261433	0.562	0.623	0.0339803
Npepps	1.61178e-06	-0.275289	0.503	0.561	0.034223
Usp9x	1.65735e-06	-0.265923	0.629	0.709	0.0351905
Syngr2	1.67009e-06	-0.262634	0.762	0.815	0.035461
Ftl1	1.68717e-06	-0.398061	0.998	1	0.0358237
Igf1r	1.72056e-06	-0.320495	0.246	0.308	0.0365327
Atf4	1.73967e-06	0.263809	0.922	0.883	0.0369383
Nt5dc2	1.74317e-06	-0.307218	0.4	0.572	0.0370127
Aoah	1.83602e-06	-0.314442	0.259	0.248	0.0389843
Smg1	1.87132e-06	-0.280034	0.59	0.593	0.0397338
Rps12	1.89943e-06	-0.282372	0.992	0.995	0.0403307
Gramd1b	1.9144e-06	-0.329908	0.4	0.444	0.0406485
Il1r2	1.9557e-06	0.432613	0.267	0.15	0.0415253
Rpl24	1.98928e-06	-0.277078	0.992	0.984	0.0422385
Map4	2.07849e-06	-0.271613	0.543	0.561	0.0441326
Cacna1d	2.08403e-06	-0.363529	0.29	0.302	0.0442502
Lamp1	2.11088e-06	-0.336437	0.956	0.972	0.0448204
Csf3r	2.12627e-06	-0.250255	0.349	0.489	0.0451471
Nr4a2	2.29925e-06	0.34572	0.446	0.357	0.04882
Dnase1l1	2.33005e-06	-0.255296	0.539	0.614	0.0494739

## Sheet: 1 Monocytes 1
	p_val	avg_log2FC	pct.1	pct.2	p_val_adj
H2-Aa	4.64915e-76	-2.96001	0.098	0.43	9.87153e-72
H2-Ab1	4.66231e-64	-2.74356	0.156	0.485	9.89947e-60
Cd74	3.94637e-73	-2.71653	0.536	0.737	8.37932e-69
H2-Eb1	2.42245e-66	-2.6335	0.069	0.368	5.14358e-62
C1qa	6.04793e-18	-1.7881	0.144	0.383	1.28416e-13
Cmss1	1.48621e-44	-1.7136	0.059	0.213	3.15566e-40
Apoe	2.16204e-56	-1.68761	0.874	0.968	4.59066e-52
Uba52	1.05219e-102	-1.53982	0.889	0.956	2.23411e-98
Lrmda	3.15494e-30	-1.47256	0.01	0.22	6.69887e-26
Gab2	2.32931e-42	-1.29385	0.315	0.409	4.94583e-38
C1qb	1.75022e-10	-1.24275	0.292	0.512	3.71624e-06
C1qc	5.03713e-12	-1.17975	0.218	0.395	1.06953e-07
Ms4a7	4.57511e-22	-1.12471	0.248	0.429	9.71433e-18
Vav3	6.3537e-33	-1.02099	0.415	0.485	1.34908e-28
Slc8a1	9.09002e-30	-1.01439	0.167	0.29	1.93008e-25
Ext1	1.95265e-28	-1.00438	0.31	0.339	4.14606e-24
Camk1d	9.76423e-31	-0.984181	0.438	0.482	2.07324e-26
Alcam	7.18873e-24	-0.913328	0.607	0.579	1.52638e-19
Fmnl2	4.77508e-22	-0.906726	0.174	0.255	1.01389e-17
Aif1	6.09066e-27	-0.903853	0.569	0.767	1.29323e-22
Tmem176b	2.73723e-21	-0.889937	0.19	0.426	5.81197e-17
Arhgap15	5.83029e-26	-0.876631	0.349	0.421	1.23795e-21
H2-DMb1	1.95407e-27	-0.860479	0.321	0.465	4.14909e-23
Cmip	2.53891e-25	-0.860118	0.63	0.594	5.39088e-21
Cd36	8.09015e-12	-0.809051	0.223	0.38	1.71778e-07
Plcb1	1.28328e-16	-0.79444	0.452	0.407	2.72478e-12
Cers6	1.02972e-22	-0.783806	0.489	0.524	2.1864e-18
Xylt1	1.59137e-20	-0.782705	0.475	0.47	3.37895e-16
Ptprj	2.9359e-20	-0.767527	0.569	0.515	6.2338e-16
Pltp	2.50301e-23	-0.766231	0.123	0.345	5.31464e-19
Pparg	4.38522e-22	-0.755833	0.097	0.22	9.31113e-18
Sik3	2.21422e-20	-0.741208	0.413	0.388	4.70144e-16
Dennd1a	1.79967e-21	-0.711878	0.277	0.398	3.82124e-17
Tmem176a	2.75946e-19	-0.709667	0.134	0.36	5.85917e-15
Atrnl1	1.34232e-18	-0.686406	0.159	0.222	2.85016e-14
Arid5b	4.28014e-19	-0.683223	0.408	0.52	9.08803e-15
Osbpl8	6.46989e-16	-0.67668	0.702	0.649	1.37375e-11
Nav1	7.51321e-28	-0.658844	0.262	0.515	1.59528e-23
Trps1	6.41185e-16	-0.632263	0.702	0.676	1.36143e-11
Selenop	1.93524e-16	-0.61899	0.59	0.719	4.10909e-12
Grk5	5.94723e-15	-0.616327	0.349	0.351	1.26277e-10
Chil1	1.46007e-19	-0.612121	0.008	0.26	3.10016e-15
Apoc2	1.05382e-11	-0.611637	0.743	0.84	2.23757e-07
Diaph2	5.03534e-18	-0.607422	0.434	0.485	1.06915e-13
Phlpp1	5.77909e-22	-0.603095	0.044	0.173	1.22707e-17
Zeb2	2.253e-19	-0.601452	0.969	0.974	4.7838e-15
Pid1	2.72042e-17	-0.600616	0.897	0.91	5.77627e-13
Gm10076	8.45295e-21	-0.595828	0.92	0.974	1.79482e-16
Pitpnc1	8.71244e-17	-0.591755	0.177	0.261	1.84991e-12
Cd300c2	1.75918e-20	-0.587452	0.777	0.907	3.73526e-16
Col3a1	4.61151e-37	-0.586715	0.307	0.614	9.79163e-33
Gm34084	4.41062e-21	-0.581853	0.284	0.53	9.36506e-17
Nedd9	5.0767e-15	-0.577886	0.366	0.415	1.07794e-10
Bach2	1.08109e-22	-0.568517	0.059	0.211	2.29548e-18
Cxcl16	2.34982e-15	-0.566555	0.22	0.427	4.98937e-11
Fnip2	1.939e-09	-0.549206	0.493	0.453	4.11707e-05
Etv6	3.53223e-13	-0.541804	0.574	0.489	7.49998e-09
Atf3	4.07463e-14	-0.536513	0.748	0.88	8.65165e-10
Mitf	6.05751e-14	-0.536382	0.203	0.304	1.28619e-09
Pde7b	5.71908e-16	-0.536205	0.044	0.122	1.21433e-11
Zswim6	5.8617e-14	-0.532234	0.464	0.486	1.24461e-09
Tbxas1	3.16244e-13	-0.530973	0.351	0.53	6.71481e-09
Cxcl1	1.72401e-09	-0.528394	0.211	0.277	3.66059e-05
Ctse	1.40466e-21	-0.525477	0.011	0.316	2.98251e-17
Dock2	5.85063e-15	-0.525406	0.708	0.752	1.24226e-10
Itga6	1.61034e-19	-0.525092	0.113	0.287	3.41923e-15
Gphn	9.49871e-22	-0.524146	0.049	0.193	2.01686e-17
Wdr89	1.10681e-29	-0.519793	0.27	0.53	2.3501e-25
Ckb	2.19364e-12	-0.516771	0.205	0.433	4.65776e-08
Lncpint	2.02347e-11	-0.516326	0.379	0.33	4.29643e-07
Slc9a9	1.12746e-20	-0.510748	0.113	0.264	2.39393e-16
Arhgap24	2.76888e-12	-0.50401	0.316	0.348	5.87916e-08
Ppm1h	9.66829e-14	-0.498701	0.351	0.404	2.05287e-09
Ambra1	1.31543e-18	-0.493781	0.154	0.266	2.79306e-14
Elmo1	2.18764e-13	-0.480747	0.469	0.492	4.64501e-09
Arhgap26	5.09982e-10	-0.479993	0.384	0.378	1.08284e-05
Dapk1	3.12115e-15	-0.4798	0.116	0.223	6.62715e-11
mt-Nd3	3.57099e-20	-0.472464	0.943	0.977	7.58227e-16
Timp2	1.45461e-12	-0.466135	0.241	0.391	3.08857e-08
Gnaq	6.84083e-12	-0.465382	0.564	0.558	1.45251e-07
Mctp1	1.49789e-12	-0.460639	0.18	0.22	3.18047e-08
Fbxo11	1.7027e-10	-0.457859	0.505	0.462	3.61535e-06
Exoc4	9.7849e-16	-0.456893	0.184	0.298	2.07763e-11
Man1a	4.13974e-10	-0.453273	0.439	0.412	8.7899e-06
Foxn3	1.98213e-10	-0.452165	0.487	0.538	4.20866e-06
Foxp1	9.61477e-10	-0.447877	0.646	0.672	2.0415e-05
Rasgef1b	1.60126e-11	-0.445582	0.254	0.435	3.39995e-07
Sqstm1	1.02296e-09	-0.438884	0.713	0.749	2.17205e-05
Col1a2	3.4106e-26	-0.436744	0.166	0.436	7.24173e-22
Cdk14	6.29586e-10	-0.435549	0.47	0.426	1.3368e-05
Tmcc1	1.86921e-10	-0.433502	0.331	0.403	3.9689e-06
Col1a1	3.4079e-24	-0.433078	0.193	0.457	7.23599e-20
Rbm47	2.82435e-08	-0.427169	0.689	0.558	0.000599695
Wwox	1.82513e-14	-0.427084	0.054	0.134	3.87531e-10
Chd9	1.48083e-20	-0.42236	0.23	0.46	3.14424e-16
Prkcb	3.38399e-13	-0.419435	0.308	0.41	7.18524e-09
Iqgap2	1.43882e-10	-0.410514	0.272	0.392	3.05504e-06
Tbc1d5	3.29317e-13	-0.410267	0.231	0.315	6.99239e-09
Arih1	2.82982e-10	-0.40957	0.579	0.553	6.00855e-06
Traf3	3.19825e-14	-0.406291	0.17	0.254	6.79084e-10
Pde3b	7.98856e-11	-0.406236	0.185	0.264	1.69621e-06
Arl15	4.55591e-11	-0.405731	0.077	0.122	9.67356e-07
Hexb	6.51377e-11	-0.40509	0.569	0.714	1.38307e-06
Sparc	6.97231e-17	-0.403337	0.27	0.459	1.48043e-12
Gngt2	3.88247e-09	-0.399108	0.772	0.88	8.24366e-05
Tank	5.18671e-10	-0.398485	0.42	0.45	1.10129e-05
Btbd9	8.35213e-11	-0.398236	0.416	0.433	1.77341e-06
Abhd12	2.19153e-12	-0.394197	0.425	0.57	4.65327e-08
Fli1	4.33279e-11	-0.391808	0.436	0.523	9.19981e-07
Zbtb20	7.50158e-09	-0.390757	0.149	0.231	0.000159281
Dusp16	3.06452e-08	-0.387209	0.293	0.336	0.000650689
Maml3	5.4071e-09	-0.386649	0.311	0.328	0.000114809
Rapgef2	1.67266e-11	-0.386095	0.198	0.275	3.55157e-07
Gtdc1	1.22611e-13	-0.38416	0.085	0.173	2.6034e-09
Gm26740	2.13732e-12	-0.383609	0.174	0.275	4.53816e-08
Zfand3	5.72499e-10	-0.381931	0.618	0.593	1.21559e-05
Cd83	4.4222e-07	-0.381708	0.366	0.464	0.00938967
Lgmn	7.73193e-07	-0.380398	0.93	0.936	0.0164172
Mrtfa	3.1686e-13	-0.377063	0.1	0.182	6.72789e-09
Cdk8	1.17834e-13	-0.373094	0.179	0.302	2.50197e-09
Ern1	3.15768e-10	-0.372829	0.185	0.228	6.7047e-06
Kcnk13	2.12338e-09	-0.366983	0.193	0.246	4.50857e-05
Frmd4b	1.11807e-08	-0.364732	0.12	0.201	0.000237399
Dennd4a	5.57813e-07	-0.359204	0.8	0.764	0.011844
Lrrc8d	8.4388e-08	-0.358657	0.511	0.494	0.00179181
H2-DMa	3.35829e-07	-0.357809	0.616	0.658	0.00713066
Fcrls	3.57618e-11	-0.355916	0.025	0.112	7.59329e-07
Itgav	3.04446e-08	-0.355726	0.426	0.502	0.00064643
Fam172a	8.69452e-11	-0.35499	0.238	0.301	1.84611e-06
Lyst	1.34088e-07	-0.352849	0.346	0.407	0.00284709
Vti1a	6.54169e-11	-0.34912	0.215	0.277	1.389e-06
Apoc1	2.26749e-06	-0.348422	0.123	0.207	0.0481456
Cd86	6.33079e-07	-0.345307	0.766	0.758	0.0134422
Eepd1	2.18035e-07	-0.342743	0.336	0.322	0.00462953
Btaf1	3.16093e-10	-0.339464	0.354	0.427	6.7116e-06
Gpr137b	7.04955e-09	-0.339165	0.52	0.658	0.000149683
Fndc3b	1.82068e-06	-0.337629	0.523	0.505	0.0386586
Bloc1s1	3.67107e-13	-0.336632	0.421	0.597	7.79479e-09
Prkce	3.0047e-11	-0.334137	0.084	0.157	6.37987e-07
Srgap2	1.40386e-08	-0.333297	0.375	0.424	0.000298081
Postn	7.25857e-21	-0.332573	0.067	0.274	1.54121e-16
Stag1	8.51519e-10	-0.328772	0.398	0.492	1.80803e-05
Apobec1	2.35111e-08	-0.326732	0.625	0.699	0.00049921
Fmn1	4.3271e-07	-0.326578	0.195	0.214	0.00918773
Slc16a10	7.43261e-07	-0.320724	0.411	0.447	0.0157817
Rreb1	1.97908e-08	-0.320479	0.334	0.398	0.000420219
Nrp1	2.14611e-07	-0.31656	0.274	0.339	0.00455683
Sema4d	3.67726e-07	-0.312994	0.405	0.536	0.00780793
Ighm	2.40976e-09	-0.312576	0.144	0.261	5.11665e-05
Zdhhc14	1.61961e-09	-0.311888	0.046	0.111	3.43891e-05
Axl	9.23899e-15	-0.309656	0.044	0.191	1.96171e-10
Fnip1	8.88681e-07	-0.309326	0.518	0.47	0.0188694
Smchd1	4.68918e-07	-0.308858	0.557	0.626	0.00995654
Arhgap18	2.54035e-08	-0.305759	0.384	0.46	0.000539392
Phf21a	6.86078e-09	-0.304333	0.205	0.257	0.000145675
Fbxl17	7.44175e-10	-0.300507	0.116	0.176	1.58011e-05
Igfbp7	3.2624e-09	-0.299834	0.238	0.347	6.92705e-05
Uvrag	1.32762e-06	-0.296546	0.593	0.599	0.0281894
Syngr1	4.47832e-11	-0.296251	0.039	0.144	9.50882e-07
Atp8a1	1.16945e-06	-0.292982	0.382	0.421	0.024831
Kansl1	9.55113e-07	-0.29241	0.556	0.508	0.0202799
Ldlrad4	6.00161e-12	-0.290068	0.021	0.102	1.27432e-07
Arl5c	6.28358e-08	-0.288668	0.139	0.255	0.00133419
Rab43	8.79269e-07	-0.287394	0.4	0.474	0.0186695
Bcas3	3.81753e-10	-0.286991	0.095	0.176	8.10577e-06
Bcl2	4.18481e-09	-0.28657	0.149	0.226	8.8856e-05
Tmem51	7.84251e-08	-0.286256	0.42	0.536	0.0016652
Alpk1	1.03095e-09	-0.282838	0.11	0.175	2.18902e-05
Rnf150	1.09364e-07	-0.280721	0.126	0.193	0.00232213
Pias1	5.05102e-09	-0.280248	0.269	0.356	0.000107248
Irf8	1.24419e-06	-0.277952	0.531	0.611	0.0264179
Lcor	1.8751e-07	-0.276862	0.213	0.251	0.0039814
Rere	2.46896e-09	-0.275427	0.175	0.258	5.24234e-05
Tmem164	2.07822e-07	-0.268957	0.259	0.301	0.00441269
Akt3	1.73822e-10	-0.268722	0.066	0.137	3.69076e-06
Abi3	5.16423e-08	-0.26871	0.279	0.388	0.00109652
Mob3b	1.01482e-08	-0.267919	0.097	0.157	0.000215476
Vps13b	4.76188e-07	-0.267285	0.259	0.271	0.0101109
Map3k3	1.30371e-09	-0.263839	0.18	0.292	2.76817e-05
Fry	8.34802e-07	-0.260461	0.174	0.199	0.0177253
Parp8	2.60453e-08	-0.260273	0.159	0.255	0.00055302
Lrch1	6.65926e-09	-0.259109	0.157	0.225	0.000141396
Plcl2	1.61302e-07	-0.258597	0.198	0.252	0.00342493
Il31ra	1.9865e-10	-0.257983	0.007	0.102	4.21793e-06
Map4k3	4.71839e-08	-0.256494	0.113	0.196	0.00100185
Csrp1	9.42456e-10	-0.256342	0.162	0.301	2.00112e-05
Specc1	1.0032e-06	-0.254935	0.225	0.257	0.0213009
Ifi35	9.68345e-07	0.250291	0.531	0.438	0.0205609
Smarca5	8.37036e-07	0.250761	0.73	0.637	0.0177728
Hsph1	9.11607e-07	0.251125	0.215	0.141	0.0193561
Mnt	1.95592e-09	0.252087	0.433	0.318	4.15301e-05
Smad7	1.66845e-07	0.252206	0.372	0.249	0.00354261
Heatr1	1.72514e-09	0.2523	0.372	0.236	3.663e-05
Rpn2	1.40386e-06	0.252511	0.779	0.742	0.0298082
Slc20a1	1.09209e-06	0.253598	0.438	0.313	0.0231884
Kif5b	2.03797e-07	0.253668	0.785	0.707	0.00432723
Ppp2r1a	3.54721e-08	0.253776	0.689	0.564	0.000753179
Npc2	2.31241e-06	0.254037	0.985	0.983	0.0490993
Pdap1	6.09694e-07	0.25404	0.731	0.623	0.0129456
Capns1	2.2826e-07	0.254167	0.923	0.918	0.00484665
Sec11a	9.43789e-07	0.254247	0.693	0.67	0.0200395
Xaf1	1.28589e-07	0.255129	0.364	0.255	0.00273033
Sf1	2.13805e-08	0.25531	0.711	0.644	0.000453972
Eif4e2	7.33022e-07	0.255499	0.711	0.691	0.0155643
Irs2	1.8003e-07	0.255803	0.505	0.362	0.00382257
Crlf2	2.73817e-07	0.256144	0.826	0.775	0.00581396
Adprh	2.26881e-07	0.257131	0.662	0.55	0.00481736
Dhps	1.22342e-08	0.257162	0.482	0.356	0.00025977
Zfp91	4.68537e-08	0.257511	0.77	0.702	0.000994845
Eif5	6.94728e-08	0.257525	0.928	0.9	0.00147512
Sema4a	9.93701e-07	0.257816	0.467	0.374	0.0210993
Hipk1	2.19365e-07	0.257886	0.559	0.419	0.00465777
Sys1	1.44876e-06	0.257935	0.72	0.684	0.0307616
Emc7	5.74775e-07	0.257985	0.67	0.632	0.0122042
Srsf2	5.16585e-07	0.257995	0.893	0.854	0.0109686
Il1rap	2.14864e-10	0.258288	0.285	0.131	4.56221e-06
Llph	1.8911e-07	0.259119	0.797	0.728	0.00401537
Bzw1	1.56406e-06	0.259169	0.803	0.769	0.0332096
Hyou1	2.4176e-08	0.25962	0.434	0.345	0.000513329
C1galt1c1	3.10679e-08	0.259762	0.341	0.226	0.000659666
Gm14548	1.05561e-13	0.260089	0.243	0.094	2.24138e-09
Ptbp1	1.44402e-08	0.260663	0.616	0.506	0.000306609
Snx3	1.32615e-06	0.260682	0.887	0.869	0.0281581
Sh3pxd2b	1.73435e-06	0.26115	0.507	0.384	0.0368255
Eif3j1	5.26011e-07	0.261592	0.672	0.578	0.0111688
Fubp1	7.3342e-07	0.261704	0.638	0.568	0.0155727
B3gnt5	1.01774e-09	0.261812	0.318	0.188	2.16097e-05
Psmd3	5.38373e-08	0.26191	0.58	0.48	0.00114313
Fbxo34	1.66579e-07	0.262203	0.413	0.304	0.00353697
Xbp1	6.77181e-07	0.262595	0.782	0.719	0.0143786
Igf2r	1.14892e-06	0.262601	0.313	0.211	0.024395
Psma2	1.56203e-07	0.262678	0.88	0.847	0.00331665
Snrnp27	3.55802e-08	0.262683	0.575	0.468	0.000755474
Dazap1	2.81883e-09	0.262902	0.569	0.442	5.98522e-05
Luc7l2	6.95197e-08	0.263118	0.907	0.839	0.00147611
Nt5c	2.37933e-07	0.263226	0.703	0.646	0.00505204
Brd2	1.62244e-07	0.263738	0.766	0.676	0.00344493
Tmem33	1.94751e-09	0.264024	0.564	0.419	4.13514e-05
Tcf25	1.01605e-08	0.264291	0.895	0.815	0.000215739
AC149090.1	5.18844e-09	0.265691	0.411	0.252	0.000110166
Lman2	7.91104e-08	0.266336	0.811	0.786	0.00167975
Pgs1	9.74649e-09	0.266511	0.6	0.464	0.000206947
Rac2	2.79585e-07	0.266706	0.911	0.9	0.00593642
Cct2	1.09691e-06	0.267034	0.775	0.74	0.0232908
Iqsec1	3.71626e-09	0.267328	0.392	0.258	7.89073e-05
Pcnp	2.65381e-09	0.267925	0.639	0.512	5.63484e-05
Epha2	5.74699e-10	0.268232	0.152	0.041	1.22026e-05
Ddx41	6.78631e-10	0.268281	0.52	0.371	1.44094e-05
Ube2d3	3.71126e-09	0.269002	0.977	0.962	7.88012e-05
Bag6	9.26832e-10	0.269014	0.552	0.424	1.96794e-05
Serpinb8	1.51757e-07	0.269035	0.441	0.292	0.00322225
Nufip1	1.38777e-07	0.269592	0.457	0.356	0.00294666
Psma3	3.90155e-07	0.269743	0.889	0.859	0.00828416
Cd80	4.11038e-07	0.269818	0.492	0.304	0.00872758
Fcer1g	5.82018e-08	0.269943	0.995	0.997	0.0012358
2310022A10Rik	1.40892e-06	0.27035	0.531	0.394	0.0299155
Tram1	2.52734e-07	0.271246	0.721	0.64	0.0053663
Zbtb7a	2.83741e-08	0.271738	0.582	0.46	0.000602468
Actn4	1.30672e-07	0.27174	0.657	0.535	0.00277455
Ugp2	1.06967e-07	0.272777	0.597	0.474	0.00227123
M6pr	1.22315e-08	0.27283	0.844	0.801	0.000259712
Pak1ip1	1.38437e-08	0.272951	0.595	0.521	0.000293943
Hdac5	5.9067e-09	0.273139	0.616	0.454	0.000125417
Riok3	4.68551e-08	0.273431	0.856	0.736	0.000994875
Rara	2.1173e-08	0.273565	0.556	0.459	0.000449566
Rab21	6.05288e-09	0.273716	0.695	0.594	0.000128521
Hck	2.0727e-07	0.273772	0.797	0.733	0.00440095
Cdv3	1.15966e-08	0.274338	0.764	0.688	0.00024623
S100a13	1.47333e-07	0.274604	0.846	0.825	0.00312833
Ralb	2.06871e-08	0.27531	0.718	0.622	0.000439249
Cdc42ep4	4.39258e-11	0.275728	0.292	0.155	9.32676e-07
Stt3a	1.85499e-08	0.275732	0.605	0.523	0.00039387
Sf3b1	3.86208e-09	0.2758	0.91	0.886	8.20036e-05
Snrpa	3.63907e-09	0.275808	0.574	0.43	7.72684e-05
Raly	9.19904e-09	0.275928	0.772	0.69	0.000195323
Timm17a	1.19349e-08	0.276068	0.572	0.473	0.000253413
Gnai2	2.27516e-08	0.27635	0.989	0.988	0.000483084
Oas3	8.82799e-10	0.277027	0.326	0.157	1.87445e-05
Gnl3	7.4343e-07	0.277053	0.513	0.403	0.0157852
Cct3	1.46029e-07	0.277167	0.69	0.596	0.00310063
Fermt3	3.26264e-08	0.277389	0.88	0.834	0.000692757
Dynlrb1	1.83915e-08	0.277571	0.82	0.766	0.000390508
Atp1a3	4.17661e-08	0.278023	0.421	0.307	0.000886819
Cct7	1.24701e-08	0.27835	0.743	0.673	0.000264778
Gtf2b	4.69236e-08	0.278691	0.636	0.526	0.000996329
Krit1	1.62104e-08	0.278886	0.487	0.354	0.000344196
Adam9	9.75737e-09	0.278913	0.57	0.438	0.000207178
Sbno2	4.96325e-08	0.279556	0.679	0.579	0.00105385
Arpc4	3.98292e-08	0.279713	0.898	0.891	0.000845694
Kdelr2	1.06807e-07	0.280152	0.677	0.553	0.00226784
Cltc	1.43668e-07	0.280224	0.89	0.857	0.00305051
Vdac1	1.92004e-07	0.280224	0.597	0.523	0.00407683
Ndel1	2.04017e-08	0.28026	0.841	0.802	0.000433189
Tgif1	3.52172e-08	0.280858	0.651	0.514	0.000747766
Mrpl54	3.25741e-08	0.281183	0.841	0.771	0.000691645
Fam129b	1.82149e-06	0.281257	0.841	0.644	0.0386756
Vdr	6.31041e-11	0.281317	0.251	0.108	1.33989e-06
Mkrn1	1.46229e-08	0.28181	0.818	0.774	0.000310488
Hk2	1.11398e-06	0.281889	0.53	0.4	0.0236531
Cd37	1.39965e-08	0.282263	0.554	0.424	0.000297188
Lsm12	1.20909e-08	0.282459	0.779	0.699	0.000256725
Ubb	6.89834e-07	0.283617	0.989	0.977	0.0146472
Cdc42se1	2.38633e-09	0.284024	0.68	0.603	5.0669e-05
Sulf2	1.75167e-08	0.284239	0.448	0.347	0.000371932
Tcof1	3.0744e-09	0.28429	0.564	0.442	6.52787e-05
Tubb2a	6.00124e-07	0.284485	0.457	0.336	0.0127424
Ier5	2.34363e-07	0.284591	0.859	0.851	0.00497622
Chchd2	2.56858e-08	0.284757	0.961	0.967	0.000545387
Hnrnpc	2.42228e-09	0.28485	0.849	0.758	5.14323e-05
Hnrnpdl	2.20063e-09	0.28599	0.797	0.719	4.6726e-05
Coro1a	4.69125e-08	0.286298	0.98	0.98	0.000996093
Srp9	1.70737e-08	0.286612	0.889	0.891	0.000362527
Snrpd1	2.01177e-08	0.286614	0.756	0.667	0.000427159
Kcnab2	1.44565e-10	0.286618	0.356	0.216	3.06954e-06
Tspan31	3.92247e-10	0.286788	0.551	0.421	8.32857e-06
BC005537	5.89138e-08	0.286905	0.916	0.869	0.00125092
Ube2l3	4.47724e-09	0.287529	0.91	0.894	9.50652e-05
March7	1.92339e-08	0.287902	0.733	0.672	0.000408394
Capza2	8.53076e-08	0.288079	0.943	0.941	0.00181134
Sidt2	4.31675e-10	0.288466	0.575	0.47	9.16576e-06
Myl12b	4.77556e-09	0.289131	0.923	0.922	0.0001014
Taldo1	2.04846e-07	0.289191	0.952	0.956	0.00434949
Fes	5.0665e-10	0.289201	0.767	0.626	1.07577e-05
Clk1	3.13328e-09	0.289479	0.79	0.698	6.6529e-05
Atf4	3.66042e-09	0.290033	0.898	0.845	7.77216e-05
1700017B05Rik	9.61873e-09	0.290502	0.602	0.476	0.000204235
Edem1	9.50879e-09	0.291117	0.785	0.672	0.0002019
Man2b1	5.46796e-08	0.291431	0.866	0.812	0.00116101
Pstpip1	2.17722e-09	0.291446	0.716	0.606	4.62289e-05
Rps28	5.02548e-08	0.291472	0.993	0.994	0.00106706
Slc25a24	3.47573e-12	0.292017	0.361	0.199	7.38002e-08
Gm2000	1.46193e-12	0.292182	0.449	0.251	3.10412e-08
Vcp	7.07677e-08	0.292269	0.849	0.804	0.00150261
Inf2	1.56353e-10	0.292472	0.461	0.318	3.31985e-06
Map2k1	2.15856e-09	0.293279	0.567	0.418	4.58327e-05
Gng5	6.58286e-09	0.294425	0.98	0.97	0.000139774
Cyth4	8.14534e-10	0.294612	0.907	0.857	1.7295e-05
Itga5	3.70632e-09	0.294744	0.574	0.43	7.86962e-05
Atf6b	2.04155e-12	0.294749	0.438	0.269	4.33482e-08
H13	1.0279e-08	0.295454	0.807	0.743	0.000218253
Tln1	2.04082e-09	0.295491	0.948	0.938	4.33327e-05
Pdcd6	1.91577e-09	0.295774	0.739	0.714	4.06776e-05
Stx7	2.97844e-09	0.296116	0.782	0.714	6.32413e-05
Surf4	9.70019e-09	0.296149	0.792	0.714	0.000205964
Hnrnpu	1.39658e-09	0.296296	0.9	0.83	2.96536e-05
Lilra6	7.57726e-15	0.296338	0.285	0.106	1.60888e-10
Scp2	3.18591e-08	0.296493	0.782	0.781	0.000676464
Fis1	8.85961e-11	0.297164	0.907	0.862	1.88116e-06
Prrc2c	1.08059e-09	0.297229	0.836	0.775	2.29442e-05
Pirb	4.83237e-08	0.297328	0.893	0.88	0.00102606
Adora2b	3.48733e-09	0.297576	0.48	0.334	7.40464e-05
Shtn1	2.15822e-11	0.298405	0.344	0.185	4.58255e-07
Abcf1	2.12695e-09	0.299235	0.693	0.571	4.51616e-05
Pim3	1.50167e-07	0.299427	0.516	0.457	0.0031885
Anxa11	1.24663e-08	0.30005	0.643	0.489	0.000264697
Wdfy1	4.17912e-13	0.300178	0.393	0.196	8.87353e-09
Myh9	5.28906e-09	0.300745	0.918	0.894	0.000112303
Psmb10	9.22218e-09	0.300792	0.779	0.714	0.000195815
Pcbp1	1.22167e-10	0.301554	0.903	0.875	2.59397e-06
Serpine1	5.53635e-08	0.302162	0.169	0.108	0.00117553
Wdr1	3.12052e-09	0.302211	0.81	0.772	6.6258e-05
Ccnd3	4.34755e-07	0.302626	0.61	0.471	0.00923115
Gna13	4.12519e-08	0.302959	0.864	0.798	0.000875903
Tmed9	5.64925e-08	0.303116	0.826	0.816	0.00119951
Atp6ap1	7.23685e-11	0.303383	0.836	0.733	1.5366e-06
Kmt5a	2.77968e-10	0.303517	0.608	0.454	5.9021e-06
Arhgef1	6.82401e-11	0.303595	0.639	0.521	1.44894e-06
Psmb7	1.40639e-10	0.303897	0.762	0.641	2.98619e-06
Slc3a2	2.08333e-08	0.304034	0.916	0.856	0.000442353
Prelid1	3.12651e-08	0.304399	0.879	0.888	0.000663851
Ap2a2	3.29264e-08	0.304414	0.715	0.623	0.000699125
Uba1	3.2579e-10	0.306505	0.672	0.571	6.91751e-06
Mpc1	3.75115e-07	0.307036	0.734	0.699	0.00796482
Trim8	1.8716e-11	0.307357	0.579	0.424	3.97396e-07
Csde1	1.34117e-10	0.307726	0.887	0.815	2.8477e-06
Got2	3.43504e-11	0.30867	0.603	0.459	7.29361e-07
Stom	9.51169e-09	0.309199	0.472	0.299	0.000201962
Tmem104	2.7715e-12	0.309216	0.43	0.269	5.88472e-08
Milr1	2.24108e-10	0.30947	0.503	0.359	4.7585e-06
Pdxk	6.55348e-08	0.309526	0.485	0.328	0.0013915
Mydgf	6.1047e-10	0.310449	0.777	0.707	1.29621e-05
Ist1	9.30646e-13	0.310564	0.615	0.459	1.97604e-08
Mvp	1.68354e-10	0.31109	0.749	0.597	3.57467e-06
Adcy7	1.34164e-09	0.311237	0.595	0.47	2.84871e-05
Ssr3	2.33878e-09	0.312834	0.793	0.702	4.96593e-05
Ube2i	5.74577e-10	0.312949	0.87	0.809	1.22e-05
Met	5.17543e-10	0.313033	0.38	0.179	1.0989e-05
Cldnd1	5.45072e-13	0.313127	0.52	0.351	1.15735e-08
Rin3	7.33201e-12	0.313909	0.436	0.266	1.5568e-07
U2af2	5.98306e-12	0.314532	0.613	0.48	1.27038e-07
Higd1a	5.66447e-08	0.31474	0.759	0.69	0.00120274
Ppp1r2	4.9935e-10	0.314925	0.708	0.634	1.06027e-05
Vamp7	3.04411e-14	0.314929	0.393	0.239	6.46356e-10
Lrrc25	1.70642e-09	0.315054	0.823	0.78	3.62325e-05
Spcs2	1.26935e-07	0.315218	0.826	0.81	0.0026952
Ogfrl1	1.88117e-10	0.315642	0.584	0.429	3.99428e-06
Laptm4a	1.09399e-10	0.316167	0.856	0.784	2.32287e-06
Tob1	1.10771e-11	0.31663	0.374	0.223	2.35199e-07
Dnaja1	2.41118e-08	0.31759	0.839	0.766	0.000511966
Hnrnpab	2.78921e-10	0.317602	0.849	0.764	5.92232e-06
Ostc	9.79825e-08	0.317673	0.757	0.711	0.00208046
Pnrc1	1.86569e-09	0.31824	0.861	0.83	3.96142e-05
Ywhae	8.69355e-10	0.31895	0.897	0.898	1.8459e-05
Pabpc1	1.28441e-10	0.319127	0.961	0.939	2.7272e-06
Egln1	5.00547e-09	0.319148	0.541	0.432	0.000106281
Casp6	2.42312e-10	0.319218	0.382	0.234	5.14501e-06
Fosl2	4.53224e-09	0.319538	0.787	0.69	9.6233e-05
Diaph1	9.33958e-10	0.319903	0.913	0.869	1.98307e-05
Trpv2	3.21655e-13	0.319918	0.559	0.354	6.82969e-09
Ucp2	1.01448e-09	0.320576	0.977	0.973	2.15404e-05
Prkcd	9.79685e-11	0.320782	0.844	0.688	2.08017e-06
Ciao2a	8.27095e-08	0.320902	0.807	0.751	0.00175617
Tet2	9.21961e-10	0.320937	0.675	0.515	1.9576e-05
Rac1	4.39923e-11	0.321843	0.944	0.951	9.34089e-07
Ufm1	9.87763e-10	0.322196	0.72	0.632	2.09732e-05
Anxa6	8.94588e-11	0.322731	0.577	0.447	1.89948e-06
Rhoa	2.2487e-10	0.323129	0.966	0.979	4.77466e-06
Tm6sf1	1.21767e-09	0.323527	0.826	0.769	2.58548e-05
Ndufa3	7.74652e-12	0.323647	0.9	0.85	1.64482e-07
Mir22hg	4.91323e-10	0.324056	0.762	0.669	1.04323e-05
Trim30a	1.48143e-07	0.324635	0.602	0.454	0.00314551
Per1	2.98882e-13	0.324791	0.639	0.474	6.34617e-09
Sod1	3.46512e-10	0.325267	0.692	0.617	7.35749e-06
Tlr2	2.21449e-07	0.325596	0.754	0.691	0.00470202
Selenos	1.96425e-08	0.325947	0.775	0.733	0.000417068
Atp5k	1.39142e-10	0.326732	0.928	0.898	2.95441e-06
Stard3nl	4.42168e-14	0.32687	0.415	0.251	9.38855e-10
Msn	2.34584e-11	0.32703	0.966	0.957	4.98092e-07
Ikbke	1.14893e-17	0.32722	0.305	0.102	2.43953e-13
Set	1.34168e-09	0.32727	0.862	0.764	2.84879e-05
Csf2rb	3.95025e-07	0.327618	0.852	0.792	0.00838756
Slc35b1	1.98651e-10	0.327763	0.598	0.47	4.21795e-06
Fmnl1	3.36469e-10	0.328276	0.774	0.696	7.14425e-06
Pdlim7	5.27964e-11	0.328425	0.402	0.243	1.12103e-06
Gm5150	2.85614e-08	0.329132	0.611	0.492	0.000606445
Ppp2ca	1.38581e-11	0.329194	0.93	0.904	2.94248e-07
Snx18	1.23815e-10	0.329722	0.815	0.731	2.62896e-06
Hnrnpl	3.12424e-13	0.330425	0.648	0.518	6.63371e-09
Lars2	3.56056e-10	0.330811	0.877	0.831	7.56015e-06
Mtpn	1.48017e-10	0.330821	0.802	0.704	3.14285e-06
Srsf9	2.91834e-11	0.330967	0.805	0.722	6.19651e-07
Snx20	2.52116e-10	0.330997	0.731	0.649	5.35317e-06
1110008P14Rik	2.06107e-12	0.331671	0.464	0.34	4.37628e-08
Sra1	4.19753e-12	0.331938	0.764	0.693	8.91262e-08
Plek	3.67872e-08	0.33198	0.943	0.91	0.000781102
Cast	9.60705e-10	0.332124	0.687	0.555	2.03987e-05
Plod3	6.33333e-11	0.332722	0.621	0.486	1.34476e-06
Ap3s1	1.08865e-09	0.333651	0.702	0.609	2.31152e-05
Ost4	1.91837e-10	0.333865	0.895	0.894	4.07327e-06
Sec11c	6.46564e-09	0.334434	0.813	0.769	0.000137285
AI662270	3.72364e-10	0.33456	0.775	0.693	7.90641e-06
Sh2b2	7.38686e-11	0.334637	0.546	0.356	1.56845e-06
Noct	3.57064e-10	0.335232	0.608	0.436	7.58154e-06
H3f3a	3.5342e-10	0.335797	0.992	0.994	7.50416e-06
Cd44	4.86321e-10	0.33594	0.985	0.983	1.03261e-05
Aldh2	9.97855e-10	0.335963	0.866	0.828	2.11875e-05
Arf6	3.18006e-13	0.336642	0.716	0.568	6.75223e-09
Iscu	1.91856e-12	0.336767	0.79	0.69	4.07368e-08
Actr3	5.1919e-11	0.336814	0.972	0.982	1.1024e-06
Akt1	9.4726e-13	0.337341	0.813	0.772	2.01132e-08
Hdlbp	5.37032e-10	0.337568	0.769	0.681	1.14028e-05
Dok2	9.57625e-07	0.338167	0.675	0.549	0.0203333
Ezr	2.34095e-09	0.338808	0.784	0.684	4.97054e-05
Arhgdia	1.37343e-13	0.339757	0.956	0.954	2.91621e-09
Ifi211	3.07504e-08	0.340021	0.428	0.301	0.000652924
Nucb2	1.06199e-10	0.340949	0.53	0.41	2.25493e-06
Ptges3	1.58548e-11	0.341027	0.764	0.646	3.36646e-07
Tle3	2.54764e-11	0.341165	0.457	0.296	5.40941e-07
Gnb2	9.87875e-14	0.34173	0.972	0.97	2.09755e-09
Metap2	4.31722e-11	0.341886	0.79	0.728	9.16675e-07
Lcp1	1.44538e-11	0.343389	0.967	0.974	3.06898e-07
Arpc2	4.05101e-12	0.34353	0.992	0.994	8.60151e-08
Xdh	9.03685e-09	0.343549	0.7	0.544	0.000191879
Psma6	1.17447e-09	0.343819	0.775	0.745	2.49375e-05
Hsp90b1	1.71994e-07	0.34454	0.936	0.93	0.00365194
Znhit1	8.84489e-12	0.34468	0.67	0.59	1.87803e-07
Dbi	3.79123e-09	0.344907	0.936	0.927	8.04993e-05
Wnk1	4.91426e-09	0.344951	0.925	0.86	0.000104344
Eif2s2	3.498e-11	0.345585	0.889	0.845	7.42731e-07
Morf4l2	3.73974e-12	0.34582	0.68	0.593	7.94059e-08
Zfp36l2	8.18312e-08	0.345902	0.846	0.821	0.00173752
Sla	2.94869e-10	0.346081	0.539	0.415	6.26096e-06
Serp1	3.59934e-10	0.346522	0.885	0.859	7.64247e-06
Rpl41	4.13436e-11	0.346542	0.998	0.998	8.77848e-07
H2-T23	4.02757e-09	0.346923	0.802	0.708	8.55174e-05
Tsc22d4	1.02885e-11	0.346938	0.795	0.71	2.18455e-07
Arf5	5.00887e-13	0.346966	0.959	0.947	1.06353e-08
Ifi209	4.62791e-09	0.347596	0.448	0.283	9.82644e-05
Stk40	2.80654e-12	0.34762	0.677	0.486	5.95912e-08
Sec61a1	7.34765e-12	0.34838	0.718	0.606	1.56013e-07
Cope	1.87616e-11	0.348744	0.803	0.745	3.98365e-07
Bcl2l1	5.8277e-11	0.349601	0.469	0.295	1.2374e-06
Azin1	1.84234e-10	0.349923	0.752	0.616	3.91185e-06
Cenpb	4.17388e-12	0.349974	0.728	0.603	8.86239e-08
Ifitm2	1.366e-08	0.349982	0.985	0.979	0.000290042
Cmpk1	4.76054e-12	0.350029	0.854	0.827	1.01081e-07
Pgd	1.73626e-10	0.350637	0.852	0.824	3.68659e-06
Arl6ip5	1.23174e-11	0.350833	0.643	0.495	2.61536e-07
Sde2	1.3552e-13	0.351573	0.611	0.47	2.87749e-09
Il13ra1	8.36671e-13	0.352684	0.584	0.453	1.7765e-08
Cdk2ap1	1.22667e-16	0.352835	0.452	0.257	2.60459e-12
Clic1	3.09608e-11	0.354122	0.972	0.967	6.57391e-07
Hnrnpd	3.20264e-14	0.354685	0.872	0.827	6.80017e-10
Hcls1	5.33042e-15	0.355173	0.892	0.837	1.13181e-10
Mdh2	4.33825e-10	0.355369	0.8	0.772	9.21141e-06
Tspo	1.97021e-08	0.356344	0.948	0.948	0.000418335
Fpr2	6.31132e-10	0.35677	0.338	0.196	1.34008e-05
Atp2a2	4.46147e-11	0.35689	0.718	0.597	9.47305e-07
B2m	1.8668e-16	0.357992	1	0.998	3.96378e-12
Rnpep	1.92225e-11	0.359122	0.767	0.705	4.08152e-07
Nampt	7.30389e-12	0.359346	0.592	0.397	1.55084e-07
Hypk	8.66126e-16	0.359364	0.484	0.301	1.83905e-11
Fkbp1a	1.17512e-11	0.359822	0.833	0.781	2.49514e-07
Calm1	1.77739e-12	0.359924	0.998	0.992	3.77394e-08
Gda	1.10125e-08	0.360271	0.934	0.872	0.000233829
Cyth1	8.20354e-09	0.360744	0.795	0.532	0.000174186
Mrpl33	1.57357e-10	0.361357	0.939	0.926	3.34117e-06
Ptafr	1.0425e-08	0.361537	0.666	0.571	0.000221354
Cotl1	3.46654e-10	0.361558	0.984	0.977	7.36051e-06
Cd33	2.70601e-13	0.36219	0.416	0.239	5.74566e-09
Arpc1b	1.18152e-12	0.36244	0.99	0.991	2.50872e-08
Selplg	1.75112e-11	0.362695	0.813	0.716	3.71815e-07
Cytip	1.4109e-08	0.362827	0.911	0.853	0.000299577
Tmem189	2.88372e-10	0.3635	0.861	0.769	6.123e-06
Hnrnpk	3.00563e-13	0.36379	0.941	0.924	6.38185e-09
Tnfaip2	2.12951e-06	0.365033	0.577	0.485	0.0452159
Thbd	1.73593e-09	0.365137	0.369	0.226	3.68589e-05
Vps37b	6.49739e-09	0.366269	0.569	0.429	0.000137959
Junb	6.21961e-10	0.368624	0.985	0.968	1.32061e-05
Ifi204	8.18149e-09	0.368657	0.83	0.777	0.000173718
Lamp2	9.81769e-15	0.369514	0.964	0.935	2.08459e-10
Psap	2.47154e-13	0.370655	0.998	0.997	5.24783e-09
Ssbp4	2.33993e-13	0.371262	0.789	0.681	4.96838e-09
Ier3	2.1026e-06	0.371786	0.864	0.828	0.0446446
Rrbp1	8.48375e-14	0.371855	0.974	0.956	1.80135e-09
St13	1.04936e-10	0.372871	0.772	0.682	2.2281e-06
Nus1	2.10691e-13	0.373982	0.613	0.476	4.4736e-09
Runx3	1.93059e-10	0.374054	0.659	0.526	4.09923e-06
Ndufb1-ps	1.14173e-13	0.374071	0.951	0.954	2.42424e-09
Fkbp5	1.08158e-18	0.374382	0.402	0.191	2.29652e-14
Ppib	2.07217e-11	0.374954	0.939	0.935	4.39983e-07
Tgfb1	4.06035e-11	0.375908	0.933	0.913	8.62134e-07
Errfi1	5.77545e-10	0.376691	0.431	0.298	1.2263e-05
Rhov	4.12351e-13	0.376805	0.487	0.289	8.75544e-09
Grina	2.34817e-09	0.377087	0.792	0.723	4.98588e-05
Eif4g1	1.09428e-13	0.378274	0.751	0.62	2.32347e-09
Emp3	2.99231e-12	0.37833	0.97	0.962	6.35357e-08
Tmed5	4.9378e-15	0.3784	0.851	0.805	1.04844e-10
Degs1	2.44369e-13	0.378488	0.685	0.565	5.18868e-09
Msrb1	2.01572e-08	0.378582	0.926	0.93	0.000427998
Hnrnpf	1.39896e-13	0.37896	0.934	0.942	2.97042e-09
Pi16	7.82125e-17	0.37988	0.379	0.198	1.66069e-12
Cers2	7.69943e-12	0.380306	0.769	0.719	1.63482e-07
Spty2d1	1.92196e-13	0.381957	0.685	0.562	4.0809e-09
Nucb1	3.12114e-16	0.383009	0.657	0.518	6.62712e-12
Hmgb1	1.69481e-14	0.383431	0.903	0.86	3.5986e-10
Srsf5	9.9704e-18	0.38362	0.964	0.957	2.11701e-13
Gsn	1.32008e-10	0.383782	0.857	0.767	2.80293e-06
Creld2	7.58401e-10	0.384178	0.502	0.38	1.61031e-05
Sec61g	8.75801e-11	0.38452	0.957	0.956	1.85959e-06
Id1	2.57129e-14	0.385159	0.274	0.108	5.45962e-10
Bak1	3.35366e-15	0.387123	0.698	0.559	7.12083e-11
Flot1	2.05049e-13	0.387166	0.636	0.508	4.35381e-09
Atp1a1	1.79385e-15	0.387282	0.956	0.921	3.80888e-11
Dstn	1.54153e-11	0.387871	0.782	0.684	3.27313e-07
Dpep2	3.72809e-10	0.387975	0.474	0.295	7.91586e-06
Fcgr1	9.93412e-09	0.388625	0.879	0.815	0.000210931
Spint1	5.12564e-09	0.390837	0.31	0.175	0.000108833
Bnip3	1.37795e-08	0.391217	0.352	0.277	0.000292581
Rhob	3.33404e-09	0.392025	0.661	0.54	7.07917e-05
Polr2l	1.71844e-14	0.39245	0.511	0.366	3.64875e-10
Pdia3	1.3505e-10	0.392925	0.889	0.884	2.86752e-06
Oasl2	5.79584e-12	0.393304	0.392	0.201	1.23063e-07
Snx2	1.58717e-10	0.393508	0.751	0.678	3.37004e-06
Itgb7	4.2498e-10	0.393994	0.705	0.54	9.02359e-06
Clec4e	1.0399e-08	0.395756	0.913	0.851	0.000220802
Bhlhe40	9.35071e-10	0.396277	0.561	0.397	1.98544e-05
Bst1	8.18108e-11	0.39854	0.725	0.625	1.73709e-06
Arhgdib	2.10862e-12	0.400503	0.957	0.96	4.47723e-08
Apobr	6.39119e-18	0.400558	0.534	0.343	1.35704e-13
Klf9	1.91683e-13	0.400946	0.543	0.331	4.07001e-09
Ubald2	7.31237e-16	0.402463	0.734	0.597	1.55263e-11
Lrp10	3.54746e-17	0.402823	0.767	0.638	7.53232e-13
Smim3	2.19345e-13	0.404009	0.654	0.492	4.65735e-09
Cycs	4.76143e-12	0.40413	0.816	0.749	1.01099e-07
Naaa	1.8002e-12	0.404368	0.649	0.511	3.82236e-08
Snx1	2.69885e-14	0.405604	0.641	0.515	5.73046e-10
Ywhaz	1.57038e-18	0.405927	0.962	0.944	3.33438e-14
Cd47	1.05712e-13	0.407059	0.895	0.897	2.24459e-09
Rhog	1.87249e-19	0.40774	0.877	0.828	3.97586e-15
Rrp1b	2.39044e-17	0.408143	0.489	0.267	5.07563e-13
Mcl1	1.39719e-15	0.408184	0.984	0.982	2.96666e-11
Pilra	5.24886e-10	0.408406	0.734	0.66	1.11449e-05
Tmbim6	1.01594e-18	0.408547	0.954	0.95	2.15714e-14
Eif4a1	1.09938e-14	0.410302	0.982	0.973	2.3343e-10
Gan	1.19457e-12	0.411081	0.43	0.239	2.53643e-08
Myl12a	2.39186e-13	0.413208	0.916	0.913	5.07864e-09
Ssr1	3.15923e-15	0.41553	0.762	0.669	6.708e-11
Havcr2	5.25176e-12	0.415912	0.548	0.378	1.11511e-07
Shisa5	2.81445e-18	0.416371	0.951	0.935	5.97592e-14
Prkar1a	6.97258e-16	0.41698	0.823	0.798	1.48049e-11
Tnfrsf1a	3.44244e-17	0.417194	0.81	0.699	7.30934e-13
Hnrnpa2b1	3.8117e-19	0.417674	0.967	0.941	8.09339e-15
Tmed2	5.59092e-14	0.417913	0.907	0.886	1.18712e-09
Il4ra	1.5406e-12	0.418902	0.761	0.625	3.27115e-08
Ndrg1	5.85263e-12	0.419514	0.357	0.228	1.24269e-07
Slc38a2	3.17489e-14	0.420452	0.78	0.632	6.74124e-10
Ninj1	7.28436e-10	0.421213	0.936	0.854	1.54669e-05
Arglu1	2.15262e-19	0.421424	0.777	0.625	4.57067e-15
Tpi1	1.14486e-07	0.423155	0.831	0.839	0.00243088
Pfkp	7.32344e-14	0.424016	0.652	0.483	1.55499e-09
Ostf1	1.84426e-16	0.42436	0.939	0.942	3.91592e-12
Chmp2a	9.31436e-19	0.425143	0.926	0.901	1.97772e-14
Arpc5	1.41151e-17	0.425364	0.964	0.957	2.99707e-13
Anxa5	1.06838e-12	0.426116	0.941	0.912	2.2685e-08
Gpr35	8.76127e-19	0.428373	0.746	0.588	1.86028e-14
Cox17	2.69903e-15	0.428379	0.925	0.884	5.73085e-11
Prdx5	6.43949e-13	0.430569	0.969	0.976	1.3673e-08
Plec	3.13678e-12	0.430635	0.83	0.696	6.66033e-08
Cxcr4	5.24329e-12	0.431036	0.744	0.632	1.11331e-07
H3f3b	3.83655e-14	0.431703	0.997	0.997	8.14615e-10
Ero1l	2.80863e-13	0.431771	0.48	0.351	5.96355e-09
Arf1	1.53086e-17	0.435681	0.939	0.927	3.25047e-13
Mcemp1	1.96782e-10	0.438227	0.664	0.527	4.17828e-06
Rtp4	1.67993e-10	0.438586	0.428	0.275	3.56699e-06
Rab20	5.1778e-14	0.438666	0.726	0.57	1.0994e-09
Alox5ap	3.93014e-17	0.439282	0.984	0.982	8.34486e-13
Esyt1	4.74423e-18	0.4408	0.718	0.552	1.00734e-13
Carhsp1	3.36073e-15	0.441246	0.584	0.41	7.13584e-11
Pglyrp1	4.06404e-12	0.441699	0.316	0.116	8.62917e-08
Pdia4	6.74598e-12	0.441926	0.562	0.419	1.43237e-07
Ugcg	9.04027e-19	0.444627	0.52	0.327	1.91952e-14
Slc9a3r1	2.46239e-18	0.446621	0.638	0.5	5.22838e-14
Dusp5	3.78026e-14	0.447853	0.674	0.505	8.02664e-10
Rab7	1.21904e-19	0.448168	0.93	0.877	2.58838e-15
Jund	1.00184e-15	0.449282	0.982	0.974	2.12721e-11
Eif4ebp1	1.54293e-14	0.449361	0.808	0.751	3.2761e-10
Vasp	5.82218e-15	0.449433	0.756	0.655	1.23622e-10
Eif5a	1.76709e-17	0.449592	0.966	0.953	3.75206e-13
Calr	2.43885e-12	0.45007	0.969	0.959	5.17842e-08
Slfn1	1.23106e-13	0.450081	0.449	0.277	2.61391e-09
Gde1	1.45497e-09	0.450181	0.659	0.568	3.08934e-05
Hist1h2bc	1.3537e-11	0.450315	0.311	0.176	2.87432e-07
Timp1	1.52343e-06	0.450569	0.403	0.318	0.032347
Actg1	4.18222e-12	0.451775	1	0.998	8.88011e-08
Pxk	3.38502e-18	0.451852	0.69	0.503	7.18741e-14
Gm2a	1.06297e-19	0.451863	0.974	0.944	2.257e-15
Eno1	1.3503e-11	0.451887	0.926	0.926	2.86709e-07
Hnrnpa0	2.82208e-23	0.452261	0.923	0.878	5.99213e-19
Anxa7	1.20779e-18	0.452457	0.692	0.506	2.5645e-14
Mindy1	6.02024e-20	0.45274	0.63	0.381	1.27828e-15
Ehd1	7.66852e-16	0.453954	0.91	0.84	1.62826e-11
Tuba1b	5.65441e-12	0.454457	0.651	0.527	1.2006e-07
Gm11808	7.64692e-21	0.455143	0.59	0.432	1.62367e-16
Fgl2	1.57257e-14	0.455568	0.505	0.315	3.33904e-10
Mbd2	6.04298e-19	0.457558	0.813	0.719	1.28311e-14
Gch1	8.13807e-17	0.45809	0.69	0.503	1.72796e-12
Cdkn1a	8.33524e-19	0.458695	0.944	0.878	1.76982e-14
Rab5c	2.54083e-17	0.460958	0.902	0.85	5.39494e-13
Kdm6b	1.37986e-18	0.461018	0.833	0.716	2.92986e-14
Fam162a	2.82301e-10	0.461737	0.487	0.45	5.99409e-06
Ubc	2.89163e-22	0.462103	0.993	0.994	6.1398e-18
Ifitm3	2.22947e-13	0.46416	0.992	0.994	4.73383e-09
Sorl1	3.05457e-16	0.464168	0.598	0.43	6.48577e-12
Dynll1	2.24631e-15	0.464216	0.928	0.91	4.76958e-11
1810037I17Rik	1.41482e-19	0.468567	0.838	0.799	3.00409e-15
Gstm1	8.65473e-20	0.470803	0.5	0.271	1.83766e-15
Arrdc4	5.11658e-16	0.471255	0.557	0.378	1.0864e-11
Lrp1	3.8631e-21	0.471623	0.969	0.938	8.20252e-17
Lgals9	1.21701e-15	0.472934	0.693	0.498	2.58407e-11
Anxa1	4.45216e-10	0.474395	0.844	0.746	9.45327e-06
Nfkbia	7.75584e-08	0.475674	0.884	0.836	0.0016468
Sdcbp	1.42082e-18	0.475875	0.985	0.953	3.01682e-14
Cfp	3.7746e-13	0.476179	0.884	0.763	8.0146e-09
Cd164	3.30756e-21	0.478219	0.533	0.324	7.02295e-17
Por	3.79755e-13	0.478243	0.849	0.704	8.06334e-09
Ccl6	1.15321e-07	0.480924	0.962	0.964	0.0024486
Lsp1	1.71008e-17	0.480963	0.954	0.942	3.63101e-13
Napsa	3.48513e-13	0.481882	0.882	0.787	7.39997e-09
Malat1	5.67953e-20	0.482044	1	1	1.20594e-15
Ms4a6d	1.99571e-11	0.482203	0.882	0.862	4.23749e-07
Tarm1	1.88628e-18	0.484444	0.5	0.292	4.00513e-14
Lrrfip1	3.4688e-20	0.486207	0.92	0.815	7.3653e-16
Pira2	3.12795e-20	0.486362	0.539	0.36	6.64158e-16
Osm	4.2691e-11	0.486413	0.723	0.588	9.06457e-07
Cap1	1.90139e-23	0.488687	0.905	0.798	4.03722e-19
Nlrp3	6.26012e-16	0.48954	0.772	0.62	1.32921e-11
Dync1i2	7.61718e-22	0.490352	0.811	0.637	1.61736e-17
Btg1	5.32507e-21	0.491041	0.987	0.992	1.13067e-16
Pim1	5.58481e-26	0.491173	0.979	0.96	1.18582e-21
Zbp1	5.54977e-15	0.491254	0.608	0.488	1.17838e-10
Gpi1	1.32028e-16	0.49901	0.903	0.894	2.80335e-12
Tppp3	3.03558e-07	0.499638	0.397	0.302	0.00644545
Cfl1	4.13759e-26	0.500861	0.993	0.994	8.78534e-22
Capn2	2.20679e-20	0.501732	0.761	0.637	4.68568e-16
Card19	5.24031e-17	0.502299	0.93	0.884	1.11268e-12
Clec5a	2.06735e-17	0.502382	0.474	0.28	4.38961e-13
Fxyd5	3.81242e-26	0.502386	0.997	0.995	8.0949e-22
Flna	1.19847e-20	0.503535	0.928	0.872	2.54471e-16
Ly6e	1.11805e-21	0.503798	0.99	0.98	2.37395e-17
Tpm3	2.94689e-24	0.504262	0.972	0.957	6.25713e-20
Selenok	4.98337e-23	0.504497	0.943	0.913	1.05812e-18
Isg15	5.64186e-10	0.505259	0.446	0.292	1.19794e-05
AY036118	6.81787e-23	0.505331	0.893	0.746	1.44764e-18
Ets2	7.84732e-20	0.507379	0.833	0.72	1.66622e-15
Aldoa	2.35494e-13	0.507595	0.952	0.951	5.00024e-09
Ldha	8.67858e-14	0.513914	0.931	0.918	1.84272e-09
Plk3	1.31939e-16	0.516264	0.569	0.386	2.80146e-12
Irf2bp2	2.5688e-25	0.516618	0.915	0.801	5.45432e-21
Mif	1.00967e-08	0.518768	0.821	0.804	0.000214384
F10	4.14594e-12	0.519409	0.846	0.725	8.80307e-08
Ahnak	1.1287e-20	0.523833	0.974	0.95	2.39658e-16
Zyx	5.29621e-20	0.528043	0.841	0.775	1.12454e-15
Fcgr2b	1.53078e-14	0.529062	0.846	0.795	3.2503e-10
Gpat3	2.0365e-23	0.529372	0.575	0.324	4.32409e-19
Emp1	4.19879e-10	0.530351	0.797	0.655	8.91529e-06
Vim	2.87506e-15	0.535839	0.985	0.989	6.10461e-11
Fcgr3	1.3516e-19	0.536796	0.941	0.91	2.86985e-15
Sirpb1c	2.57788e-19	0.538974	0.798	0.736	5.47362e-15
Uck2	1.82579e-18	0.54219	0.595	0.386	3.87671e-14
Ptpre	2.8671e-19	0.544686	0.764	0.661	6.08771e-15
Slc39a14	1.93575e-23	0.546031	0.61	0.359	4.11018e-19
C3	6.27937e-18	0.551229	0.71	0.549	1.3333e-13
Slfn2	1.685e-16	0.551558	0.915	0.828	3.57777e-12
Tes	1.21277e-21	0.552565	0.592	0.354	2.57508e-17
Cndp2	3.09758e-20	0.552618	0.867	0.778	6.57708e-16
Ccr1	2.20589e-20	0.553314	0.916	0.834	4.68376e-16
Mmp9	1.05699e-07	0.554538	0.121	0.044	0.0022443
Lpl	1.77232e-06	0.555153	0.23	0.172	0.0376317
Cd300lf	1.24732e-21	0.556299	0.697	0.52	2.64844e-17
Rnh1	3.69662e-15	0.557743	0.943	0.875	7.84902e-11
Slc15a3	3.63269e-26	0.558297	0.91	0.839	7.71328e-22
Slc16a3	7.80873e-18	0.562122	0.867	0.778	1.65803e-13
Csf2ra	2.37137e-34	0.563199	0.969	0.932	5.03513e-30
Glipr2	2.06478e-20	0.566751	0.61	0.392	4.38416e-16
Net1	1.86808e-24	0.567032	0.349	0.128	3.96649e-20
Tmsb10	7.51586e-18	0.570097	0.993	0.988	1.59584e-13
Emb	3.21583e-21	0.570934	0.915	0.839	6.82817e-17
Hist1h1c	8.61072e-14	0.572555	0.42	0.284	1.82831e-09
Glrx	1.86418e-17	0.57907	0.757	0.638	3.95821e-13
Pgam1	1.2424e-14	0.580369	0.895	0.863	2.63799e-10
Txnip	1.00257e-21	0.580602	0.703	0.489	2.12875e-17
Lmnb1	4.48889e-19	0.581701	0.728	0.609	9.53127e-15
Atp11b	3.53129e-28	0.590509	0.621	0.365	7.498e-24
Pgk1	3.98048e-16	0.59206	0.907	0.898	8.45175e-12
Cxcl2	1.5385e-07	0.592172	0.939	0.821	0.0032667
Mgst1	9.75601e-12	0.592555	0.603	0.474	2.07149e-07
P4hb	2.13606e-26	0.592992	0.921	0.816	4.53549e-22
F13a1	1.51198e-14	0.593952	0.907	0.786	3.21038e-10
Hopx	2.10421e-15	0.594852	0.643	0.453	4.46788e-11
Actr2	2.10017e-35	0.595427	0.957	0.888	4.45929e-31
Furin	8.36495e-26	0.595943	0.775	0.65	1.77613e-21
Gapdh	7.50507e-20	0.599107	0.985	0.982	1.59355e-15
Tpm4	4.40525e-27	0.60414	0.897	0.84	9.35366e-23
C5ar1	2.48346e-20	0.605854	0.92	0.84	5.27313e-16
Cd53	3.7603e-37	0.613433	0.98	0.973	7.98425e-33
Mxd1	2.28899e-24	0.614265	0.584	0.353	4.86021e-20
Prdx6	1.12726e-17	0.614775	0.889	0.837	2.3935e-13
Plp2	4.21749e-29	0.619617	0.479	0.191	8.95499e-25
Gm42418	1.74623e-34	0.621567	1	1	3.70777e-30
Vegfa	1.91137e-13	0.63185	0.582	0.404	4.0584e-09
Cd14	4.3048e-22	0.632984	0.987	0.962	9.14038e-18
Lmna	6.65537e-16	0.637084	0.857	0.676	1.41313e-11
Ifi27l2a	1.19426e-12	0.639643	0.925	0.877	2.53576e-08
Chmp4b	1.63772e-39	0.641768	0.952	0.915	3.47736e-35
Ms4a4c	5.1204e-15	0.642406	0.816	0.72	1.08721e-10
Pfn1	7.18304e-37	0.642855	1	0.992	1.52518e-32
Msr1	2.5797e-23	0.646113	0.889	0.805	5.47748e-19
Il1rn	5.11258e-09	0.64729	0.467	0.348	0.000108555
Itgam	1.94639e-28	0.652514	0.952	0.921	4.13278e-24
Cd9	6.30022e-08	0.655497	0.544	0.497	0.00133773
Myadm	9.20083e-28	0.65701	0.707	0.46	1.95361e-23
Id2	1.937e-14	0.660786	0.785	0.64	4.11284e-10
Esd	1.13735e-20	0.663625	0.936	0.906	2.41494e-16
Tagln2	8.82927e-25	0.67047	0.949	0.933	1.87472e-20
Chd7	1.81367e-31	0.670719	0.91	0.755	3.85096e-27
Itgb2	1.1724e-43	0.670815	0.974	0.957	2.48937e-39
Trem1	2.86402e-25	0.680313	0.78	0.543	6.08116e-21
S100a6	4.49081e-29	0.684352	0.995	0.977	9.53533e-25
Capg	1.59108e-25	0.688912	0.946	0.869	3.37835e-21
Neat1	2.95385e-25	0.698015	0.964	0.894	6.2719e-21
Lrg1	1.50691e-09	0.699587	0.495	0.363	3.19962e-05
Emilin2	3.20495e-45	0.699625	0.969	0.929	6.80507e-41
Lilr4b	3.51753e-34	0.704477	0.926	0.815	7.46876e-30
Sdc1	5.29704e-16	0.706519	0.354	0.193	1.12472e-11
Wfdc21	6.5551e-08	0.709723	0.374	0.155	0.00139184
Tuba1c	4.65951e-41	0.71215	0.831	0.559	9.89354e-37
Pkm	4.07687e-36	0.718877	0.989	0.976	8.65642e-32
Slfn4	6.87356e-26	0.718988	0.439	0.17	1.45946e-21
Cd24a	9.12405e-21	0.723175	0.531	0.283	1.93731e-16
Gsr	2.65545e-23	0.725234	0.852	0.729	5.63832e-19
Tgm2	9.54801e-23	0.732433	0.885	0.821	2.02733e-18
Slc2a1	1.92095e-33	0.744895	0.693	0.433	4.07875e-29
Hp	1.67466e-15	0.758667	0.856	0.713	3.5558e-11
Ltb4r1	5.07401e-32	0.76857	0.83	0.714	1.07736e-27
Dmkn	3.20497e-13	0.779385	0.477	0.286	6.80512e-09
Actb	7.35842e-66	0.794087	1	1	1.56241e-61
Ly6c2	1.16732e-11	0.794153	0.661	0.505	2.47856e-07
Ccdc71l	6.62728e-53	0.7999	0.638	0.309	1.40717e-48
S100a10	7.6923e-30	0.802903	0.957	0.936	1.63331e-25
S100a4	7.25307e-38	0.806138	0.992	0.968	1.54005e-33
Lilrb4a	3.38965e-50	0.806225	0.979	0.924	7.19724e-46
Gm26917	4.79412e-20	0.80641	0.757	0.719	1.01794e-15
Rgcc	3.3912e-18	0.818683	0.752	0.549	7.20054e-14
Mmp19	5.2916e-18	0.834049	0.687	0.451	1.12357e-13
Srgn	8.47442e-39	0.834421	0.995	0.989	1.79937e-34
Cebpb	3.74005e-64	0.839436	0.993	0.992	7.94125e-60
Ccl9	6.81916e-28	0.865027	0.964	0.919	1.44791e-23
Adam8	3.56075e-38	0.881573	0.898	0.734	7.56054e-34
Mmp8	8.10702e-37	0.890667	0.507	0.231	1.72136e-32
Anxa2	1.90184e-47	0.901857	0.979	0.948	4.03818e-43
Gm47283	4.08091e-45	0.907282	0.818	0.489	8.66499e-41
Spp1	6.51863e-08	0.936635	0.775	0.739	0.0013841
Ccl2	1.27562e-12	0.946226	0.857	0.748	2.70853e-08
AA467197	2.33545e-08	0.970103	0.359	0.179	0.000495886
Ecm1	4.83879e-24	0.971566	0.793	0.649	1.02742e-19
Plaur	3.68884e-56	0.979385	0.925	0.856	7.83251e-52
Mt2	3.01854e-15	0.998053	0.452	0.281	6.40926e-11
Thbs1	1.07854e-35	1.00126	0.966	0.907	2.29006e-31
Hilpda	4.22468e-21	1.00701	0.69	0.444	8.97026e-17
Sell	7.30229e-39	1.0509	0.548	0.228	1.55049e-34
S100a11	2.86487e-75	1.0847	0.989	0.973	6.08297e-71
Cxcl3	9.08196e-07	1.08586	0.4	0.258	0.0192837
Il1r2	1.59676e-34	1.14412	0.569	0.239	3.3904e-30
Jdp2	8.61975e-75	1.15246	0.734	0.401	1.83023e-70
Mt1	9.91785e-34	1.16269	0.954	0.903	2.10586e-29
Sdc4	1.25523e-40	1.19132	0.654	0.366	2.66524e-36
Ccl24	5.11291e-11	1.30492	0.292	0.149	1.08562e-06
Vcan	2.09747e-59	1.3991	0.861	0.52	4.45356e-55
Lcn2	4.77845e-44	1.48523	0.474	0.134	1.01461e-39
S100a9	1.71885e-61	2.41127	0.293	0.064	3.64964e-57
S100a8	5.17864e-62	2.59608	0.58	0.222	1.09958e-57
Chil3	8.71575e-166	3.25863	0.885	0.681	1.85062e-161

## Sheet: 2 Granulocytes
	p_val	avg_log2FC	pct.1	pct.2	p_val_adj
Cmss1	1.19244e-20	-1.0126	0.004	0.159	2.53191e-16
Oser1	3.02156e-45	-0.784403	0.149	0.485	6.41567e-41
Lrmda	4.56985e-13	-0.713309	0.002	0.123	9.70315e-09
Uba52	1.75343e-25	-0.681444	0.291	0.559	3.72306e-21
Gab2	5.36163e-19	-0.612977	0.112	0.225	1.13843e-14
Arhgap15	1.3543e-14	-0.588494	0.153	0.251	2.87558e-10
Atf3	2.51476e-09	-0.568284	0.448	0.621	5.33959e-05
Gm10076	3.22253e-16	-0.538077	0.379	0.63	6.84239e-12
Apoe	3.5153e-11	-0.537988	0.239	0.467	7.46403e-07
Alcam	5.72469e-13	-0.521059	0.204	0.295	1.21552e-08
Sik3	1.47316e-15	-0.504333	0.113	0.194	3.12795e-11
Grk5	1.21909e-12	-0.480527	0.064	0.123	2.58849e-08
Xylt1	7.18528e-10	-0.452989	0.214	0.247	1.52565e-05
Hist2h2aa1	1.68658e-25	-0.44151	0.067	0.295	3.58111e-21
Kpna4	9.17278e-09	-0.416013	0.391	0.493	0.000194766
Irak2	5.95542e-09	-0.414021	0.4	0.388	0.000126451
Trps1	2.44688e-10	-0.393995	0.171	0.282	5.19545e-06
Fabp5	1.27435e-11	-0.392505	0.151	0.366	2.70582e-07
Cmip	2.65323e-10	-0.389584	0.301	0.405	5.63361e-06
Dock2	6.21243e-10	-0.37877	0.329	0.388	1.31909e-05
Ripor2	1.32365e-06	-0.376128	0.188	0.233	0.0281051
Baz2b	3.66363e-07	-0.372263	0.319	0.366	0.00777899
Ptprj	1.36676e-10	-0.367291	0.076	0.137	2.90204e-06
Mir142hg	1.12682e-06	-0.363085	0.27	0.229	0.0239258
Chst11	7.16569e-11	-0.355095	0.122	0.207	1.52149e-06
Col3a1	4.784e-14	-0.348103	0.228	0.471	1.01579e-09
Gpr137b	7.3874e-11	-0.345752	0.112	0.304	1.56857e-06
Camk1d	2.23864e-09	-0.341831	0.14	0.189	4.75331e-05
Map3k5	6.75344e-10	-0.337732	0.124	0.198	1.43396e-05
Susd6	4.28065e-09	-0.335811	0.244	0.352	9.08911e-05
Col1a1	5.26619e-14	-0.32928	0.151	0.326	1.11817e-09
Prkcb	7.94878e-09	-0.308225	0.156	0.269	0.000168776
Mctp1	3.49171e-07	-0.279686	0.097	0.119	0.00741394
Col1a2	1.11271e-12	-0.27163	0.095	0.282	2.36262e-08
Utrn	1.05188e-06	-0.253803	0.084	0.128	0.0223346
Sparc	5.47873e-09	-0.250696	0.186	0.339	0.00011633
Phf21a	1.41704e-06	-0.250227	0.143	0.194	0.030088
Arrb2	2.32281e-06	0.290276	0.522	0.383	0.0493203
Plp2	7.22838e-07	0.295173	0.367	0.203	0.015348
Tgif1	2.15836e-06	0.316875	0.338	0.189	0.0458284
Tmbim6	5.90943e-07	0.339585	0.713	0.648	0.0125475
Tuba1c	3.33738e-07	0.34832	0.482	0.264	0.00708626
1810037I17Rik	4.15703e-08	0.34893	0.452	0.264	0.000882662
Rab7	1.19318e-06	0.352435	0.738	0.59	0.0253347
Srrm2	5.65062e-08	0.354989	0.613	0.405	0.0011998
Jak2	5.08893e-09	0.35925	0.426	0.233	0.000108053
Pycard	1.23062e-07	0.360402	0.257	0.088	0.00261297
N4bp1	1.26252e-06	0.364795	0.55	0.344	0.0268071
Pfn1	5.57538e-07	0.365841	0.939	0.903	0.0118382
Bst1	2.42532e-07	0.370242	0.456	0.291	0.00514968
Pnrc1	2.9273e-07	0.371462	0.828	0.753	0.00621554
Slc22a15	1.44936e-08	0.372933	0.395	0.185	0.000307743
Ptafr	3.82292e-07	0.373197	0.584	0.432	0.00811721
Cd33	6.24969e-08	0.376523	0.554	0.419	0.001327
Rabgef1	1.23564e-08	0.382699	0.55	0.335	0.000262363
Cotl1	1.64755e-06	0.384399	0.809	0.744	0.0349824
Chchd2	4.6229e-08	0.387951	0.703	0.559	0.00098158
Ets2	4.73207e-08	0.390248	0.796	0.705	0.00100476
Ccr1	1.57259e-07	0.390331	0.849	0.722	0.00333908
Tiparp	1.15807e-07	0.395649	0.405	0.256	0.00245893
Ehd1	5.47638e-07	0.397499	0.645	0.463	0.011628
Snx18	4.56292e-09	0.398477	0.545	0.37	9.68844e-05
Clec5a	1.78421e-07	0.399433	0.533	0.344	0.00378842
Dmxl2	2.95029e-09	0.403325	0.387	0.216	6.26435e-05
Dgat1	1.07254e-06	0.405141	0.387	0.282	0.0227732
Tlr2	2.56698e-07	0.408603	0.427	0.264	0.00545048
Fpr1	4.54386e-09	0.411511	0.261	0.093	9.64798e-05
Bcl2l1	1.27285e-10	0.414012	0.349	0.119	2.70265e-06
Clec4d	1.19095e-06	0.415809	0.845	0.727	0.0252874
Mcl1	6.20632e-08	0.417071	0.945	0.916	0.00131779
Malat1	1.85933e-13	0.42808	0.998	1	3.94792e-09
Cyp4f18	5.93938e-07	0.430077	0.657	0.529	0.0126111
Vegfa	2.69088e-08	0.43119	0.293	0.128	0.000571355
Mindy3	2.32647e-09	0.431579	0.325	0.123	4.93979e-05
Fpr2	8.90248e-09	0.432789	0.439	0.229	0.000189026
Trem1	1.7775e-07	0.433573	0.838	0.753	0.00377417
Pkm	5.00652e-08	0.434028	0.843	0.806	0.00106304
Gpr35	1.1416e-10	0.437405	0.459	0.238	2.42395e-06
Fbxl5	3.0786e-07	0.437532	0.465	0.291	0.0065368
Csf2ra	9.83046e-11	0.442147	0.75	0.599	2.0873e-06
Dpep2	1.71549e-10	0.446964	0.239	0.031	3.64251e-06
Bhlhe40	8.54899e-09	0.447824	0.464	0.313	0.000181521
Slc16a3	5.6122e-07	0.451761	0.633	0.502	0.0119164
Bcl2l11	1.78665e-09	0.454211	0.421	0.207	3.7936e-05
Trib1	5.69182e-10	0.454448	0.843	0.749	1.20854e-05
Ubc	1.49942e-09	0.454572	0.965	0.96	3.18372e-05
Actb	5.89144e-11	0.461008	0.996	1	1.25093e-06
Junb	2.13592e-07	0.463497	0.946	0.912	0.00453519
Ptpn22	1.02536e-12	0.466	0.361	0.11	2.17715e-08
Plk3	1.62916e-08	0.468448	0.784	0.683	0.00034592
C5ar1	2.9245e-10	0.475174	0.797	0.665	6.20959e-06
Nlrp3	4.60315e-08	0.476417	0.729	0.498	0.000977388
Jund	7.06257e-08	0.479327	0.909	0.894	0.00149959
Alox5ap	5.03227e-10	0.485169	0.865	0.784	1.0685e-05
Itgam	1.47012e-10	0.488709	0.698	0.493	3.1215e-06
Nt5e	3.15474e-11	0.493956	0.306	0.079	6.69847e-07
Chd7	8.31869e-09	0.498829	0.692	0.529	0.000176631
Gsn	3.53787e-10	0.506668	0.765	0.59	7.51196e-06
H3f3b	6.99495e-08	0.507709	0.976	0.978	0.00148524
Lmnb1	3.58607e-11	0.513296	0.828	0.678	7.6143e-07
Clec4e	2.90629e-07	0.513521	0.852	0.789	0.00617092
Laptm5	1.11863e-14	0.515032	0.901	0.833	2.3752e-10
Skil	7.29204e-13	0.518675	0.617	0.379	1.54832e-08
Btg2	8.05164e-10	0.529684	0.873	0.744	1.7096e-05
Cdkn1a	3.45094e-08	0.550572	0.48	0.273	0.000732737
Cd47	1.6079e-11	0.552457	0.617	0.41	3.41405e-07
Noct	1.77913e-11	0.554102	0.461	0.233	3.77763e-07
Resf1	7.76961e-11	0.555138	0.861	0.709	1.64972e-06
Bcl2a1a	4.55883e-10	0.555356	0.428	0.22	9.67977e-06
Ucp2	1.44189e-13	0.571048	0.627	0.436	3.06157e-09
Phlda1	2.05668e-10	0.571994	0.385	0.159	4.36694e-06
Prnp	1.80921e-14	0.574867	0.319	0.048	3.8415e-10
Spp1	2.24917e-07	0.581507	0.49	0.507	0.00477566
Tgfbi	3.95784e-12	0.588993	0.632	0.463	8.40368e-08
Hspa4l	1.16608e-11	0.592609	0.508	0.273	2.47593e-07
Gapdh	1.82996e-09	0.612301	0.729	0.626	3.88556e-05
Aldoa	5.50791e-11	0.613219	0.728	0.626	1.1695e-06
Ccrl2	1.80309e-07	0.619924	0.772	0.626	0.00382851
Cxcr4	4.24589e-14	0.620411	0.728	0.502	9.0153e-10
Atp1b3	8.61665e-13	0.672866	0.464	0.225	1.82957e-08
Egr1	7.54515e-13	0.683844	0.876	0.806	1.60206e-08
Mt1	1.38543e-06	0.705637	0.4	0.278	0.0294169
Jdp2	9.01361e-19	0.706953	0.494	0.22	1.91386e-14
Tgm2	4.58736e-16	0.715237	0.721	0.515	9.74034e-12
Fth1	4.43049e-10	0.71809	0.988	0.982	9.40727e-06
Mif	1.47383e-13	0.720207	0.533	0.344	3.12939e-09
Mmp9	1.92179e-16	0.721441	0.906	0.758	4.08054e-12
Cxcl2	2.81602e-13	0.727564	0.991	0.93	5.97925e-09
Lcn2	1.04329e-06	0.735325	0.415	0.273	0.0221522
S100a8	1.64414e-08	0.757159	0.967	0.934	0.000349099
Klhl6	2.75781e-20	0.758074	0.452	0.132	5.85567e-16
Ifitm1	2.0998e-08	0.811308	0.645	0.537	0.000445851
Bcl2a1b	4.21496e-16	0.835156	0.717	0.573	8.94963e-12
G0s2	1.49419e-08	0.842791	0.725	0.476	0.000317262
Tnf	4.11193e-13	0.883391	0.526	0.348	8.73085e-09
Ier3	3.73797e-15	0.889451	0.765	0.546	7.93684e-11
Plaur	3.15911e-17	0.902009	0.559	0.322	6.70773e-13
Wfdc21	2.28354e-11	0.938905	0.46	0.278	4.84864e-07
AA467197	3.17232e-17	0.939566	0.639	0.423	6.73579e-13
Stfa2l1	1.34307e-07	0.973668	0.432	0.269	0.00285174
Cebpb	4.09703e-32	0.979078	0.98	0.912	8.69923e-28
Il1r2	1.07497e-39	1.12993	0.965	0.841	2.28249e-35
Thbs1	2.77331e-14	1.13124	0.467	0.225	5.88856e-10
Bcl2l15	6.79642e-20	1.15401	0.433	0.026	1.44308e-15
Hilpda	6.16381e-17	1.16095	0.519	0.229	1.30876e-12
Cd14	1.4642e-47	1.63866	0.891	0.555	3.10893e-43
Cxcl3	1.49586e-36	2.04251	0.611	0.198	3.17616e-32
Chil3	4.24665e-58	2.45185	0.586	0.075	9.01692e-54

## Sheet: 3 Fibroblasts 1
	p_val	avg_log2FC	pct.1	pct.2	p_val_adj
Cmss1	7.80238e-73	-3.25157	0.486	0.609	1.65668e-68
Glis3	3.82961e-74	-3.12136	0.391	0.664	8.13141e-70
Maml2	3.73737e-79	-3.00111	0.468	0.745	7.93556e-75
Gpc6	1.92654e-98	-3.00044	0.8	0.926	4.09063e-94
Slit2	4.81826e-66	-2.97409	0.5	0.77	1.02306e-61
Camk1d	6.40397e-63	-2.96002	0.186	0.508	1.35976e-58
Zfpm2	8.72371e-73	-2.63632	0.659	0.786	1.85231e-68
Airn	1.96393e-69	-2.62823	0.364	0.697	4.17001e-65
Pde3a	1.00925e-63	-2.62328	0.55	0.759	2.14295e-59
Grk5	5.35945e-60	-2.47499	0.732	0.797	1.13797e-55
Mast4	1.59211e-70	-2.46713	0.859	0.938	3.38052e-66
Sox5	4.85705e-61	-2.40133	0.477	0.704	1.0313e-56
Abi1	2.58818e-65	-2.37961	0.814	0.899	5.49548e-61
Prkg1	1.3052e-47	-2.37405	0.177	0.479	2.77133e-43
Ptn	1.16737e-41	-2.33033	0.441	0.836	2.47868e-37
Pdzrn3	2.72183e-68	-2.29675	0.736	0.91	5.77927e-64
Fbxl7	4.09146e-58	-2.2385	0.518	0.758	8.68739e-54
Ghr	1.6692e-47	-2.23069	0.768	0.851	3.5442e-43
Tenm3	6.77822e-62	-2.21335	0.541	0.806	1.43922e-57
Ptprm	4.82475e-57	-2.21049	0.364	0.637	1.02444e-52
Lncpint	7.14014e-51	-2.20393	0.486	0.741	1.51607e-46
Col24a1	1.44561e-33	-2.19907	0.091	0.362	3.06946e-29
Large1	2.87801e-55	-2.18306	0.509	0.722	6.11087e-51
Fn1	4.12602e-117	-2.16022	0.95	0.999	8.76079e-113
Mcc	2.19149e-46	-2.14731	0.6	0.779	4.6532e-42
Pcdh9	3.50531e-38	-2.12983	0.559	0.692	7.44283e-34
Gab2	4.99903e-49	-2.08905	0.555	0.746	1.06144e-44
Dip2c	1.00365e-45	-2.07758	0.564	0.643	2.13104e-41
Cobll1	1.28328e-42	-2.07662	0.227	0.522	2.72478e-38
Slc8a1	9.22439e-47	-2.05535	0.509	0.752	1.95861e-42
Bach2	9.3526e-50	-2.05162	0.159	0.567	1.98584e-45
Atrnl1	1.33791e-47	-2.05107	0.541	0.671	2.84079e-43
Vav3	3.83011e-46	-2.04091	0.4	0.659	8.13247e-42
Sik3	5.52281e-55	-2.03782	0.673	0.834	1.17266e-50
Pde4d	2.7711e-36	-2.03758	0.559	0.693	5.88388e-32
Gpr176	2.99429e-52	-2.00619	0.368	0.717	6.35779e-48
Cacna2d1	5.35701e-48	-2.00054	0.682	0.796	1.13745e-43
Pappa	4.12974e-30	-1.97553	0.5	0.683	8.76868e-26
Arhgap24	3.00506e-39	-1.95291	0.523	0.699	6.38064e-35
March3	4.14445e-39	-1.95144	0.409	0.587	8.79991e-35
Cacna1c	1.10941e-42	-1.93489	0.295	0.547	2.35561e-38
Rbms3	6.77118e-46	-1.91894	0.85	0.912	1.43772e-41
Pvt1	1.30496e-44	-1.90851	0.327	0.607	2.77081e-40
Ext1	1.03001e-50	-1.88661	0.886	0.967	2.18702e-46
Gphn	4.25094e-43	-1.886	0.409	0.612	9.02603e-39
Stard13	7.62137e-43	-1.83641	0.464	0.732	1.61825e-38
Magi2	6.61403e-33	-1.82534	0.264	0.457	1.40436e-28
Bnc2	4.94959e-46	-1.80865	0.464	0.749	1.05095e-41
Wfdc18	6.37509e-16	-1.79677	0.009	0.159	1.35362e-11
Nedd4l	7.77084e-43	-1.77755	0.377	0.683	1.64998e-38
Naaladl2	6.38322e-33	-1.76437	0.068	0.398	1.35535e-28
Srgap1	8.11774e-37	-1.76165	0.441	0.691	1.72364e-32
Slit3	3.17642e-24	-1.74833	0.641	0.714	6.74449e-20
Ddah1	2.21335e-35	-1.73917	0.35	0.753	4.69961e-31
Robo1	1.46191e-32	-1.70843	0.382	0.566	3.10408e-28
Tagln	4.89457e-23	-1.70136	0.568	0.895	1.03926e-18
Setbp1	1.09105e-41	-1.68346	0.486	0.711	2.31663e-37
9530026P05Rik	6.22692e-31	-1.68209	0.086	0.379	1.32216e-26
Kalrn	2.5049e-39	-1.6672	0.309	0.642	5.31865e-35
Glis1	3.3557e-34	-1.65082	0.25	0.52	7.12516e-30
Akt3	7.96585e-42	-1.64875	0.382	0.652	1.69139e-37
Camk2d	6.4987e-47	-1.64849	0.818	0.932	1.37987e-42
Ldlrad4	3.92637e-40	-1.63546	0.705	0.862	8.33687e-36
Thbs2	8.46065e-50	-1.62602	0.627	0.923	1.79645e-45
Apbb2	7.03025e-41	-1.61867	0.755	0.888	1.49273e-36
Tspan5	3.51283e-35	-1.61417	0.368	0.581	7.45879e-31
Aopep	3.193e-44	-1.60452	0.75	0.891	6.7797e-40
Garem1	3.81359e-31	-1.60161	0.186	0.458	8.0974e-27
Cdk14	8.02198e-46	-1.59204	0.614	0.855	1.70331e-41
Ebf1	4.03954e-41	-1.58973	0.864	0.965	8.57716e-37
Piezo2	1.54924e-32	-1.58561	0.368	0.69	3.2895e-28
Pard3b	1.60569e-35	-1.58288	0.345	0.589	3.40936e-31
Dock11	1.47291e-38	-1.57695	0.305	0.603	3.12742e-34
Cthrc1	3.68533e-32	-1.56423	0.745	0.97	7.82506e-28
Rere	4.34327e-41	-1.56214	0.618	0.776	9.22207e-37
Esrrg	6.642e-24	-1.56107	0.082	0.287	1.4103e-19
Rbfox1	3.48837e-26	-1.55883	0.186	0.431	7.40686e-22
Atxn1	3.69881e-37	-1.55125	0.659	0.796	7.85368e-33
Dlg2	2.169e-28	-1.54086	0.291	0.491	4.60543e-24
Myo1d	2.99838e-37	-1.53499	0.564	0.773	6.36645e-33
Egfr	2.56792e-31	-1.52129	0.795	0.852	5.45246e-27
Ambra1	6.04734e-39	-1.5162	0.377	0.598	1.28403e-34
Utrn	8.2556e-40	-1.51477	0.623	0.807	1.75291e-35
Arl15	1.1237e-31	-1.51156	0.341	0.513	2.38595e-27
Postn	8.83806e-36	-1.51141	0.827	0.996	1.87659e-31
Cmip	2.20013e-41	-1.50805	0.686	0.847	4.67153e-37
Ube2e2	2.6009e-35	-1.5029	0.723	0.819	5.52248e-31
Rabgap1l	5.19121e-34	-1.50062	0.432	0.635	1.10225e-29
Aspn	2.33686e-35	-1.49575	0.714	0.97	4.96186e-31
H19	1.40615e-15	-1.48957	0.059	0.288	2.98568e-11
Ano6	2.69578e-39	-1.46777	0.786	0.89	5.72394e-35
Ank2	5.90562e-30	-1.46749	0.745	0.822	1.25394e-25
Lrmda	9.26757e-13	-1.46681	0.009	0.283	1.96778e-08
Jarid2	1.76941e-27	-1.46257	0.636	0.81	3.75698e-23
Cblb	1.59621e-30	-1.46216	0.705	0.821	3.38922e-26
Prkca	2.17597e-34	-1.4549	0.686	0.834	4.62023e-30
Diaph2	3.87488e-33	-1.45447	0.55	0.712	8.22752e-29
Cep85l	1.72024e-28	-1.45165	0.459	0.701	3.65259e-24
Maml3	2.514e-28	-1.41773	0.241	0.507	5.33797e-24
Flnb	1.8364e-27	-1.41404	0.523	0.762	3.89924e-23
Efna5	2.32796e-27	-1.40875	0.441	0.612	4.94296e-23
Fbxl17	2.49311e-35	-1.39604	0.441	0.664	5.29362e-31
Xylt1	4.3359e-29	-1.38566	0.45	0.641	9.20642e-25
Jag1	2.28662e-37	-1.37815	0.505	0.806	4.85518e-33
Zeb1	2.42057e-30	-1.37666	0.827	0.913	5.13959e-26
Exoc4	2.25927e-29	-1.37666	0.595	0.748	4.79711e-25
Runx2	3.08712e-29	-1.37427	0.373	0.673	6.55488e-25
Sdk1	1.10911e-22	-1.37167	0.177	0.355	2.35498e-18
Kif26b	6.01482e-31	-1.3632	0.336	0.737	1.27713e-26
Magi1	7.39946e-31	-1.36203	0.2	0.488	1.57113e-26
Mir99ahg	5.86905e-27	-1.35825	0.65	0.82	1.24617e-22
Mecom	2.21745e-26	-1.35416	0.595	0.719	4.7083e-22
Sgcd	8.64424e-30	-1.35266	0.441	0.648	1.83543e-25
Ern1	1.72646e-33	-1.3521	0.391	0.616	3.66579e-29
Wwox	5.63514e-24	-1.35184	0.264	0.424	1.19651e-19
Hivep2	6.33446e-34	-1.34963	0.895	0.958	1.345e-29
Zswim6	1.06358e-27	-1.3485	0.595	0.775	2.2583e-23
Pakap	9.2897e-25	-1.3421	0.2	0.419	1.97248e-20
Fndc3a	3.49151e-33	-1.33259	0.809	0.926	7.41351e-29
Kansl1	2.5663e-34	-1.32719	0.714	0.82	5.44902e-30
Ust	8.5008e-24	-1.32499	0.441	0.573	1.80497e-19
Fmnl2	3.13141e-23	-1.32419	0.605	0.665	6.64892e-19
Mdk	5.55522e-31	-1.31336	0.482	0.824	1.17954e-26
Col11a1	3.22368e-24	-1.30998	0.082	0.365	6.84483e-20
Pde1a	1.95978e-22	-1.30986	0.841	0.857	4.16119e-18
Arhgap42	4.85939e-28	-1.30062	0.559	0.72	1.03179e-23
Parp8	1.29339e-28	-1.2956	0.545	0.733	2.74625e-24
Elmo1	9.26325e-19	-1.28093	0.427	0.479	1.96687e-14
Rasal2	5.69853e-30	-1.27175	0.464	0.691	1.20997e-25
Frmd4a	7.1312e-28	-1.26766	0.677	0.822	1.51417e-23
Nbea	1.9032e-29	-1.26322	0.523	0.706	4.04106e-25
Snx29	6.01924e-28	-1.25981	0.114	0.419	1.27806e-23
Cfap69	2.75717e-25	-1.25974	0.159	0.471	5.85429e-21
Nr6a1	4.94108e-27	-1.25677	0.114	0.413	1.04914e-22
Gask1b	6.36527e-37	-1.25301	0.659	0.923	1.35154e-32
Btbd9	1.09281e-28	-1.24634	0.545	0.707	2.32036e-24
Hgf	1.48637e-18	-1.24194	0.268	0.533	3.15601e-14
Ddit4l	2.15098e-24	-1.24005	0.141	0.432	4.56718e-20
Eps8	2.38292e-21	-1.23841	0.764	0.819	5.05965e-17
Mmp14	8.26573e-47	-1.23519	0.9	0.987	1.75506e-42
Nrp2	2.11528e-26	-1.23395	0.3	0.598	4.49138e-22
Myo1e	2.61782e-24	-1.23245	0.255	0.496	5.55841e-20
Trps1	2.5136e-23	-1.23216	0.818	0.876	5.33713e-19
Dennd1a	4.81954e-29	-1.23017	0.391	0.6	1.02333e-24
Pitpnc1	2.65721e-15	-1.22134	0.277	0.422	5.64205e-11
Atp9b	4.1072e-29	-1.20527	0.545	0.693	8.72083e-25
Pam	2.12557e-34	-1.19899	0.918	0.995	4.51323e-30
Abtb2	3.1533e-25	-1.19712	0.345	0.584	6.69539e-21
Pde10a	5.6408e-16	-1.19468	0.518	0.619	1.19771e-11
Pbx1	3.13346e-24	-1.19464	0.823	0.905	6.65328e-20
Psd3	1.64816e-25	-1.19023	0.65	0.782	3.49954e-21
Akap13	4.34173e-28	-1.17261	0.895	0.981	9.21879e-24
Bmp6	1.84385e-18	-1.17091	0.355	0.532	3.91506e-14
Dcaf6	6.88434e-28	-1.17018	0.409	0.625	1.46175e-23
Gm17276	2.87568e-18	-1.16113	0.05	0.248	6.10593e-14
Trio	9.25932e-31	-1.1607	0.7	0.854	1.96603e-26
Zeb2	5.58071e-30	-1.15633	0.882	0.97	1.18495e-25
Col1a1	2.79661e-40	-1.14933	0.986	1	5.93804e-36
Calcrl	3.36169e-15	-1.14638	0.377	0.513	7.13788e-11
Magi3	2.10391e-23	-1.14497	0.359	0.573	4.46723e-19
Baiap2l1	4.88432e-14	-1.135	0.368	0.479	1.03709e-09
Klf12	2.30829e-23	-1.13041	0.155	0.402	4.90119e-19
Fnip2	8.12182e-28	-1.12369	0.3	0.589	1.72451e-23
Fnip1	4.26336e-29	-1.12281	0.745	0.892	9.0524e-25
Lcor	6.153e-29	-1.1204	0.291	0.591	1.30647e-24
Crim1	8.80473e-26	-1.11914	0.373	0.678	1.86951e-21
Epha7	1.63525e-16	-1.11799	0.232	0.388	3.47212e-12
B3galt1	1.02732e-21	-1.11252	0.182	0.409	2.18131e-17
Cdh2	1.15716e-23	-1.11148	0.595	0.847	2.457e-19
Auts2	1.81157e-21	-1.10832	0.755	0.848	3.84651e-17
Dgkh	3.23328e-23	-1.09788	0.459	0.671	6.86523e-19
Lhfp	4.1932e-27	-1.09667	0.936	0.996	8.90343e-23
Pan3	3.58941e-28	-1.09638	0.627	0.759	7.62139e-24
Chsy3	1.88995e-19	-1.09505	0.391	0.541	4.01294e-15
Rbm47	3.87964e-19	-1.09262	0.105	0.331	8.23763e-15
Ptpn3	4.86876e-23	-1.09236	0.155	0.409	1.03378e-18
Bcas3	3.17143e-21	-1.09229	0.295	0.468	6.73389e-17
Nkain3	1.67376e-18	-1.08853	0.114	0.3	3.5539e-14
Asxl1	9.52499e-28	-1.08642	0.536	0.717	2.02244e-23
Plxna2	9.04143e-18	-1.0855	0.273	0.46	1.91977e-13
Uty	5.16705e-24	-1.08543	0.341	0.567	1.09712e-19
Plcl1	1.06976e-22	-1.0764	0.173	0.431	2.27142e-18
Gmds	5.66741e-22	-1.0728	0.586	0.761	1.20336e-17
Herc3	4.14778e-22	-1.07007	0.068	0.362	8.80698e-18
Nav1	2.41295e-25	-1.06894	0.85	0.945	5.12342e-21
Pcdh7	1.42581e-17	-1.06699	0.786	0.808	3.02742e-13
Pamr1	1.01314e-20	-1.06311	0.277	0.539	2.1512e-16
Pde7b	7.71515e-15	-1.06217	0.059	0.205	1.63816e-10
Syne1	2.76436e-23	-1.05886	0.568	0.773	5.86957e-19
Tcf12	4.77545e-24	-1.0582	0.768	0.867	1.01397e-19
Rapgef2	2.18827e-24	-1.05484	0.464	0.664	4.64635e-20
Arhgap10	6.71264e-20	-1.05067	0.564	0.685	1.4253e-15
Meis1	2.1216e-20	-1.05008	0.445	0.623	4.50478e-16
Pkp4	2.85585e-21	-1.04922	0.364	0.594	6.06383e-17
Gli3	1.03637e-23	-1.04795	0.518	0.689	2.20053e-19
Plxdc2	9.8946e-29	-1.04586	0.8	0.954	2.10092e-24
Rfx3	6.71297e-23	-1.04128	0.205	0.444	1.42536e-18
Vps13b	2.81992e-27	-1.03982	0.327	0.596	5.98754e-23
Ankrd28	4.17765e-21	-1.03956	0.573	0.704	8.87039e-17
Fndc1	6.58277e-25	-1.03762	0.673	0.937	1.39772e-20
Tgfb2	3.83818e-20	-1.03425	0.777	0.929	8.14962e-16
Gulp1	3.43477e-17	-1.03123	0.445	0.553	7.29306e-13
Csmd1	1.02168e-08	-1.02693	0.009	0.104	0.000216933
Cemip	1.6605e-13	-1.02065	0.014	0.193	3.52575e-09
Mbtd1	2.04849e-25	-1.01936	0.545	0.759	4.34955e-21
Csnk1g1	3.9051e-25	-1.01844	0.468	0.733	8.2917e-21
Exoc6b	1.45655e-21	-1.0184	0.514	0.652	3.09268e-17
Zfp407	1.27274e-24	-1.01572	0.305	0.543	2.70241e-20
Smad3	3.44641e-19	-1.01123	0.609	0.733	7.31776e-15
Mitf	1.58171e-16	-1.0083	0.145	0.311	3.35845e-12
Pard3	1.69146e-24	-1.00657	0.568	0.728	3.59147e-20
Sobp	1.39292e-16	-1.00343	0.632	0.692	2.95759e-12
Chd2	3.92921e-23	-0.998312	0.709	0.856	8.3429e-19
Plekha5	4.01285e-22	-0.997147	0.527	0.697	8.52049e-18
Dlg1	2.46399e-22	-0.993957	0.705	0.778	5.23179e-18
Tmcc1	5.87752e-21	-0.98894	0.541	0.71	1.24797e-16
Btaf1	6.40358e-21	-0.987886	0.541	0.703	1.35967e-16
Il31ra	1.07479e-19	-0.987062	0.027	0.378	2.28209e-15
Ror1	3.11814e-16	-0.984879	0.464	0.582	6.62074e-12
Ppp3ca	6.5189e-19	-0.984505	0.895	0.926	1.38416e-14
Rassf8	2.21603e-22	-0.981068	0.673	0.833	4.70531e-18
Dlc1	1.76984e-15	-0.976647	0.855	0.891	3.7579e-11
Gtdc1	2.23686e-18	-0.975892	0.168	0.356	4.74952e-14
Adamts3	1.73881e-17	-0.971196	0.073	0.279	3.69201e-13
Mcu	4.50362e-22	-0.970655	0.509	0.685	9.56254e-18
Rora	2.136e-16	-0.969785	0.818	0.905	4.53537e-12
Arhgap6	4.31085e-14	-0.966834	0.477	0.585	9.15323e-10
Tmem164	4.96262e-18	-0.966666	0.336	0.529	1.05371e-13
Fap	1.95572e-23	-0.964822	0.373	0.694	4.15259e-19
Foxp1	2.87939e-21	-0.962816	0.909	0.977	6.11381e-17
Eya4	1.32406e-13	-0.962419	0.136	0.344	2.81138e-09
Cdk8	1.47899e-22	-0.960474	0.695	0.801	3.14035e-18
Klhl29	1.63352e-17	-0.959998	0.155	0.348	3.46845e-13
Samd4	1.77435e-20	-0.958692	0.773	0.896	3.76748e-16
Clcn5	1.14665e-17	-0.954788	0.514	0.685	2.43468e-13
Slc41a2	1.31558e-19	-0.954404	0.555	0.708	2.79338e-15
Usp53	4.06951e-15	-0.952278	0.427	0.708	8.64079e-11
Kcnt2	3.74092e-13	-0.946088	0.495	0.53	7.94309e-09
Gpcpd1	1.03265e-16	-0.939124	0.518	0.681	2.19263e-12
Rnf169	3.34547e-23	-0.938413	0.241	0.547	7.10343e-19
Arih1	6.06671e-22	-0.936161	0.868	0.898	1.28814e-17
Atp11c	1.41909e-18	-0.93561	0.264	0.453	3.01316e-14
Thrb	3.11326e-12	-0.931421	0.091	0.21	6.61038e-08
Ppp2r3a	4.32294e-21	-0.930378	0.605	0.732	9.17889e-17
Farp1	1.1537e-22	-0.929712	0.609	0.765	2.44966e-18
Ptprj	2.23575e-14	-0.928157	0.618	0.656	4.74717e-10
Dock1	4.82658e-22	-0.921012	0.586	0.759	1.02483e-17
Ascc3	2.35147e-20	-0.918517	0.795	0.865	4.99287e-16
Cers6	1.15615e-18	-0.918241	0.445	0.638	2.45484e-14
Mast2	6.61598e-21	-0.917178	0.705	0.811	1.40477e-16
Tsc22d1	3.23454e-24	-0.91492	0.591	0.82	6.86791e-20
Slc4a4	1.43572e-07	-0.913247	0.427	0.441	0.00304847
Ndrg1	3.43916e-14	-0.912955	0.541	0.803	7.30237e-10
Fam13b	1.09222e-23	-0.912768	0.414	0.657	2.3191e-19
Lrch3	2.7051e-21	-0.912645	0.468	0.669	5.74374e-17
Arhgap44	2.04778e-18	-0.911402	0.105	0.338	4.34805e-14
Kif1b	1.88784e-23	-0.909136	0.741	0.91	4.00845e-19
Thsd7a	2.09765e-11	-0.908882	0.573	0.603	4.45395e-07
Fbxl20	9.13405e-23	-0.899281	0.336	0.617	1.93943e-18
Psme4	2.23812e-22	-0.898338	0.727	0.854	4.7522e-18
Gpatch8	2.83408e-25	-0.896021	0.682	0.856	6.0176e-21
Dock10	3.70297e-10	-0.895066	0.323	0.429	7.86251e-06
Cyp7b1	1.80136e-09	-0.894764	0.432	0.485	3.82483e-05
Ehbp1	3.79399e-17	-0.894212	0.323	0.509	8.05577e-13
Col12a1	9.84333e-18	-0.89411	0.673	0.918	2.09004e-13
Sulf1	1.01648e-16	-0.893629	0.932	0.971	2.15829e-12
Nmnat2	1.20313e-12	-0.892255	0.2	0.319	2.5546e-08
Cped1	4.22289e-13	-0.891331	0.655	0.683	8.96645e-09
Mpp5	3.18937e-23	-0.889126	0.636	0.808	6.772e-19
Specc1	1.34145e-21	-0.888015	0.291	0.595	2.8483e-17
Cask	5.38895e-19	-0.885017	0.555	0.708	1.14424e-14
Acta2	9.12729e-08	-0.883862	0.745	0.906	0.001938
Numb	4.95145e-18	-0.875123	0.418	0.595	1.05134e-13
Ahr	4.19269e-17	-0.874859	0.205	0.494	8.90233e-13
Rnf217	1.75607e-13	-0.871031	0.664	0.788	3.72866e-09
Myo9a	9.74981e-19	-0.869542	0.618	0.718	2.07018e-14
Sestd1	5.99175e-17	-0.867288	0.636	0.748	1.27223e-12
Ypel2	1.89218e-17	-0.867102	0.214	0.432	4.01767e-13
Msi2	4.64484e-19	-0.866184	0.736	0.852	9.86239e-15
Prkcg	9.26167e-17	-0.862027	0.086	0.336	1.96653e-12
Map3k5	2.11593e-13	-0.861233	0.273	0.444	4.49275e-09
Olfr1033	1.40495e-11	-0.861078	0.509	0.597	2.98312e-07
Gria3	2.17103e-18	-0.860611	0.286	0.563	4.60975e-14
Tshz3	5.88545e-18	-0.859731	0.468	0.658	1.24966e-13
Usp32	2.64919e-21	-0.858593	0.418	0.649	5.62504e-17
Cacnb2	5.09997e-11	-0.858236	0.095	0.177	1.08288e-06
Phf21a	6.99703e-18	-0.853688	0.477	0.653	1.48568e-13
Ccn4	2.10843e-12	-0.849338	0.482	0.793	4.47682e-08
Nr1d2	2.55549e-25	-0.848053	0.627	0.869	5.42606e-21
Nrg1	2.05614e-15	-0.844522	0.055	0.261	4.36579e-11
Acsl4	7.09781e-11	-0.84402	0.85	0.874	1.50708e-06
Osbpl8	4.30642e-17	-0.843335	0.582	0.722	9.14382e-13
Ptk2	4.05089e-18	-0.842315	0.7	0.807	8.60125e-14
Nr1d1	1.14033e-17	-0.839955	0.445	0.778	2.42127e-13
Col1a2	1.0429e-21	-0.839356	0.991	1	2.21439e-17
Phlpp1	2.55144e-16	-0.839012	0.277	0.46	5.41747e-12
Rai14	7.1286e-13	-0.835588	0.714	0.759	1.51362e-08
Clca3a1	6.93387e-10	-0.834183	0.114	0.297	1.47227e-05
Ankrd12	6.28087e-18	-0.832392	0.645	0.84	1.33362e-13
P4ha3	6.45614e-25	-0.83155	0.559	0.85	1.37083e-20
Ahcyl2	9.00063e-13	-0.830152	0.464	0.591	1.9111e-08
Il1rapl1	7.59414e-09	-0.829773	0.032	0.105	0.000161246
4930402H24Rik	1.70074e-18	-0.829587	0.586	0.717	3.61118e-14
Chil1	3.94533e-08	-0.829285	0.045	0.174	0.000837712
Nsmce2	3.59049e-17	-0.825267	0.627	0.735	7.62369e-13
Myo10	3.10517e-17	-0.824815	0.414	0.684	6.59321e-13
Map3k3	1.33685e-17	-0.823578	0.482	0.644	2.83854e-13
Csrp2	1.4335e-15	-0.822864	0.918	0.991	3.04374e-11
Sh3d19	9.59943e-16	-0.821016	0.705	0.802	2.03825e-11
Col16a1	9.02155e-27	-0.819124	0.85	0.957	1.91555e-22
Ltbp2	8.36217e-13	-0.818762	0.736	0.937	1.77554e-08
Dtnb	1.33578e-17	-0.818619	0.232	0.434	2.83625e-13
Map4k5	9.86783e-19	-0.817484	0.627	0.77	2.09524e-14
Rabep1	1.53132e-18	-0.81691	0.641	0.763	3.25146e-14
Fam172a	2.09293e-15	-0.815931	0.586	0.676	4.44392e-11
Rian	6.12012e-13	-0.811564	0.741	0.902	1.29948e-08
Zfc3h1	1.925e-15	-0.809595	0.618	0.728	4.08736e-11
Atp10a	3.24134e-14	-0.809244	0.441	0.562	6.88233e-10
Stxbp5	9.97295e-19	-0.80907	0.314	0.556	2.11756e-14
Erc1	4.7839e-16	-0.807455	0.645	0.768	1.01577e-11
Cdk19	1.85184e-16	-0.807225	0.327	0.513	3.93202e-12
Ednra	6.38236e-13	-0.807088	0.291	0.451	1.35517e-08
Slc7a2	7.74091e-08	-0.805736	0.605	0.718	0.00164363
Baz2b	1.20672e-16	-0.805453	0.741	0.845	2.56224e-12
Prkce	8.1992e-19	-0.804526	0.327	0.555	1.74094e-14
Schip1	2.33846e-17	-0.80408	0.441	0.674	4.96525e-13
Acap2	3.16601e-16	-0.803959	0.691	0.78	6.72238e-12
Lyz2	3.64603e-10	-0.803865	0.55	0.717	7.74162e-06
Cpne8	4.33356e-15	-0.801272	0.582	0.752	9.20145e-11
Igsf3	2.43614e-22	-0.798083	0.777	0.912	5.17266e-18
Tom1l2	9.99897e-18	-0.797608	0.259	0.47	2.12308e-13
Npas3	1.0819e-14	-0.797037	0.073	0.253	2.29719e-10
Epb41l3	1.49122e-14	-0.796771	0.455	0.631	3.16631e-10
Zfand3	4.08853e-18	-0.795608	0.809	0.886	8.68118e-14
Srgap2	7.7757e-19	-0.795517	0.564	0.734	1.65101e-14
Ulk2	9.96262e-17	-0.792419	0.577	0.713	2.11536e-12
Sema6a	1.3863e-15	-0.791269	0.195	0.405	2.94354e-11
Arid1b	1.30057e-15	-0.785358	0.709	0.756	2.7615e-11
Ptprg	5.81664e-15	-0.783349	0.427	0.573	1.23505e-10
Myo5a	6.6102e-15	-0.782393	0.764	0.793	1.40354e-10
Ogn	1.23762e-12	-0.781384	0.864	0.96	2.62783e-08
Slc12a6	4.62894e-17	-0.780447	0.318	0.573	9.82863e-13
Prkar2b	2.94349e-13	-0.779994	0.241	0.418	6.24992e-09
Aig1	4.37072e-12	-0.778856	0.786	0.87	9.28035e-08
Wipf1	5.05884e-15	-0.778322	0.609	0.728	1.07414e-10
Tnc	1.92094e-07	-0.774398	0.759	0.957	0.00407873
Gclc	4.92654e-08	-0.77439	0.632	0.721	0.00104605
Ino80	1.38113e-18	-0.774365	0.655	0.781	2.93256e-14
Fam193a	3.19843e-20	-0.770574	0.655	0.826	6.79123e-16
Dclk1	5.74778e-14	-0.770055	0.895	0.971	1.22043e-09
Acvr1	1.02372e-17	-0.769459	0.668	0.761	2.17367e-13
Myl9	4.56111e-08	-0.768316	0.441	0.703	0.00096846
Igf1r	5.68214e-15	-0.768025	0.695	0.806	1.20649e-10
Fmn1	8.23328e-15	-0.767699	0.236	0.422	1.74817e-10
Mpp7	2.92535e-07	-0.767538	0.532	0.657	0.00621141
Pik3r1	8.14502e-14	-0.767515	0.577	0.749	1.72943e-09
Nlk	8.07521e-16	-0.76724	0.25	0.436	1.71461e-11
Katnbl1	5.49848e-19	-0.765315	0.514	0.721	1.16749e-14
Palld	1.31648e-12	-0.765249	0.705	0.911	2.79528e-08
Glipr1	3.38426e-11	-0.764608	0.15	0.4	7.1858e-07
Arhgap17	5.36554e-17	-0.761783	0.627	0.783	1.13926e-12
Ptprn	1.45084e-11	-0.761702	0.377	0.739	3.08057e-07
Trabd2b	2.92008e-10	-0.760459	0.382	0.472	6.2002e-06
Rbm6	4.09846e-17	-0.758806	0.723	0.801	8.70225e-13
Mbd5	6.42584e-16	-0.757599	0.327	0.512	1.3644e-11
Pip5k1a	3.77563e-19	-0.756688	0.791	0.902	8.01679e-15
Fam110b	6.10229e-15	-0.756147	0.241	0.465	1.2957e-10
Abhd2	1.76435e-14	-0.755304	0.655	0.801	3.74625e-10
Zmiz1	1.27288e-14	-0.754625	0.855	0.91	2.70271e-10
Stag1	2.1395e-15	-0.754377	0.755	0.852	4.5428e-11
Mrtfa	4.4796e-16	-0.754036	0.45	0.607	9.51154e-12
Osbpl3	3.83169e-17	-0.752702	0.1	0.355	8.13583e-13
Lypd1	2.52661e-15	-0.750773	0.055	0.282	5.36475e-11
Rptor	2.40902e-18	-0.74957	0.395	0.601	5.11507e-14
Fbxw11	2.26534e-15	-0.748982	0.591	0.714	4.81e-11
Gm15675	1.64381e-09	-0.748944	0.155	0.262	3.49031e-05
Spidr	7.59551e-12	-0.74772	0.382	0.496	1.61275e-07
Cd109	5.43395e-13	-0.746187	0.268	0.45	1.15379e-08
Prickle1	2.05432e-10	-0.745753	0.141	0.276	4.36194e-06
Smurf2	4.93437e-14	-0.745502	0.718	0.788	1.04771e-09
Mbnl2	3.19141e-17	-0.743334	0.936	0.992	6.77631e-13
Sik2	3.07553e-12	-0.742633	0.591	0.681	6.53028e-08
Ptprd	2.4466e-12	-0.739591	0.355	0.507	5.19487e-08
2210408I21Rik	4.68565e-15	-0.736063	0.164	0.351	9.94904e-11
Foxn3	2.0371e-17	-0.735413	0.805	0.91	4.32537e-13
Nf1	5.61356e-16	-0.734247	0.568	0.718	1.19193e-11
Rapgef6	5.09111e-15	-0.734008	0.677	0.796	1.081e-10
Col5a2	7.09991e-20	-0.732552	0.964	1	1.50752e-15
Kat6b	6.85126e-17	-0.731022	0.541	0.692	1.45473e-12
Pdgfc	3.88655e-10	-0.726822	0.064	0.17	8.2523e-06
Hdac8	9.50549e-15	-0.723842	0.2	0.367	2.0183e-10
Plagl1	5.97496e-08	-0.723289	0.245	0.489	0.00126866
Arid5b	1.30753e-11	-0.722455	0.873	0.972	2.77628e-07
Abl2	3.53536e-16	-0.72198	0.686	0.823	7.50662e-12
Lpp	1.24999e-15	-0.721797	0.909	0.967	2.65411e-11
Mid1	2.02522e-09	-0.721699	0.432	0.448	4.30016e-05
Ptbp2	2.72304e-18	-0.720735	0.6	0.74	5.78184e-14
Slc2a13	3.65193e-11	-0.719378	0.141	0.234	7.75414e-07
Sfrp1	3.95415e-08	-0.718689	0.745	0.919	0.000839585
Map3k20	4.29164e-12	-0.716189	0.568	0.631	9.11244e-08
Sh3kbp1	3.00167e-13	-0.716119	0.432	0.612	6.37344e-09
Cux1	2.67366e-16	-0.714268	0.773	0.884	5.67699e-12
Clasp1	5.29182e-15	-0.712849	0.514	0.72	1.12361e-10
Vti1a	1.69251e-14	-0.712546	0.418	0.574	3.59372e-10
Pdlim5	2.62594e-11	-0.70917	0.8	0.847	5.57566e-07
Klhl24	1.47863e-17	-0.709089	0.723	0.876	3.13957e-13
Etv6	6.3949e-12	-0.70872	0.586	0.658	1.35783e-07
Cpeb1	7.78746e-13	-0.708481	0.427	0.61	1.65351e-08
Fbxo11	1.24409e-14	-0.708063	0.655	0.761	2.64158e-10
Col8a2	4.17929e-15	-0.707698	0.105	0.363	8.87389e-11
Ralgapa1	1.48067e-13	-0.704951	0.532	0.619	3.1439e-09
Mirg	7.2779e-13	-0.704709	0.314	0.53	1.54532e-08
2610035D17Rik	2.16111e-14	-0.704402	0.105	0.306	4.58868e-10
Esyt2	3.85955e-14	-0.702083	0.814	0.903	8.19497e-10
Meg3	2.74624e-10	-0.701037	0.873	0.977	5.83109e-06
Adamts6	1.09999e-07	-0.700799	0.345	0.331	0.00233561
Tbc1d5	1.90125e-13	-0.700538	0.364	0.507	4.03692e-09
Clasp2	7.70458e-10	-0.698937	0.736	0.753	1.63591e-05
Tanc2	5.48768e-13	-0.698551	0.373	0.519	1.1652e-08
Uba52	6.11616e-11	-0.698453	0.964	0.972	1.29864e-06
Gm49797	4.25689e-15	-0.698256	0.3	0.521	9.03866e-11
Aff3	6.1032e-12	-0.697039	0.223	0.377	1.29589e-07
Asap1	6.14379e-13	-0.69416	0.773	0.838	1.30451e-08
Zfp948	4.47843e-13	-0.694013	0.55	0.72	9.50906e-09
Zfp521	1.26328e-13	-0.693787	0.355	0.529	2.68233e-09
Prdm10	3.99066e-16	-0.693574	0.091	0.328	8.47338e-12
Crebrf	1.47732e-13	-0.692006	0.418	0.646	3.1368e-09
Cachd1	2.37404e-11	-0.690298	0.359	0.482	5.04081e-07
Nhsl1	4.73731e-13	-0.690063	0.141	0.294	1.00587e-08
Zhx2	3.4662e-12	-0.689824	0.391	0.53	7.35979e-08
Rap1gds1	6.40325e-14	-0.689652	0.559	0.706	1.3596e-09
Atp2b1	1.08824e-12	-0.689641	0.877	0.974	2.31066e-08
Dennd4c	6.43257e-14	-0.68957	0.332	0.522	1.36583e-09
Itgb8	3.15656e-07	-0.688771	0.491	0.56	0.00670232
Adgrg2	3.87602e-09	-0.687625	0.309	0.424	8.22994e-05
Ccdc141	6.35965e-13	-0.685347	0.159	0.31	1.35034e-08
Ccnyl1	6.25734e-13	-0.684529	0.482	0.658	1.32862e-08
Abca1	2.11727e-07	-0.684062	0.5	0.59	0.00449559
Ebf2	2.76328e-09	-0.682966	0.591	0.669	5.86727e-05
Gk5	3.50333e-12	-0.682333	0.4	0.539	7.43862e-08
Fbxo34	5.21322e-13	-0.682254	0.582	0.756	1.10692e-08
Sbf2	1.17254e-12	-0.68199	0.623	0.72	2.48965e-08
Scaf8	3.22192e-14	-0.680182	0.586	0.686	6.84111e-10
Cdh3	1.7864e-16	-0.679491	0.032	0.356	3.79307e-12
Nav3	8.02654e-08	-0.67867	0.536	0.601	0.00170427
Gm42047	2.86537e-11	-0.678431	0.127	0.323	6.08404e-07
Tmtc2	1.31275e-06	-0.677403	0.159	0.19	0.0278736
Otud7b	9.21895e-15	-0.676536	0.577	0.753	1.95746e-10
Piezo1	6.48172e-14	-0.675848	0.741	0.828	1.37626e-09
Ttc28	1.31541e-12	-0.675825	0.723	0.848	2.793e-08
Mtmr3	1.67863e-15	-0.674907	0.464	0.626	3.56424e-11
Lpin2	5.09197e-15	-0.673992	0.409	0.616	1.08118e-10
Ankhd1	1.3864e-13	-0.673884	0.55	0.69	2.94374e-09
Svil	5.46418e-09	-0.673078	0.736	0.758	0.000116021
Zfyve1	1.24334e-14	-0.672332	0.373	0.584	2.63999e-10
Pip4k2a	1.17832e-12	-0.672038	0.423	0.58	2.50193e-08
Tiam2	1.62928e-12	-0.672019	0.15	0.324	3.45945e-08
Col14a1	3.91728e-14	-0.6719	0.814	0.988	8.31757e-10
B830012L14Rik	6.20817e-09	-0.671043	0.364	0.525	0.000131818
Ralgapa2	1.02368e-12	-0.6696	0.214	0.357	2.17358e-08
Nfatc2	3.22872e-07	-0.668684	0.359	0.519	0.00685553
Hs6st2	2.7407e-13	-0.667401	0.236	0.523	5.81933e-09
Antxr1	2.48798e-13	-0.66713	0.664	0.852	5.28272e-09
Mfap2	3.89601e-13	-0.665013	0.668	0.905	8.27239e-09
Kmt2c	4.45814e-14	-0.664717	0.582	0.707	9.46597e-10
Dip2b	6.38857e-13	-0.663443	0.459	0.569	1.35648e-08
Nhs	2.43307e-12	-0.66319	0.15	0.327	5.16615e-08
Gm16685	3.69238e-07	-0.66256	0.114	0.19	0.00784004
Mllt3	4.08952e-10	-0.662523	0.455	0.532	8.68328e-06
Fndc3b	2.86106e-13	-0.662355	0.927	0.982	6.07489e-09
Ctif	2.18826e-14	-0.662287	0.295	0.492	4.64632e-10
Rabgap1	5.21539e-14	-0.660579	0.559	0.701	1.10738e-09
Rap1gap2	2.40522e-12	-0.66024	0.295	0.457	5.10701e-08
Dbp	1.1577e-11	-0.6589	0.145	0.392	2.45815e-07
Map4	6.01788e-15	-0.657055	0.909	0.948	1.27778e-10
Peli2	5.92236e-13	-0.656026	0.305	0.486	1.2575e-08
Dst	1.99626e-14	-0.655344	0.923	0.98	4.23865e-10
Uhrf2	3.02335e-13	-0.652689	0.827	0.907	6.41947e-09
Mfap4	1.03403e-07	-0.652384	0.727	0.968	0.00219556
Insr	1.19522e-14	-0.652077	0.291	0.487	2.53781e-10
Nbas	1.52876e-12	-0.651974	0.564	0.694	3.24602e-08
Nsd3	9.73225e-13	-0.651851	0.823	0.896	2.06645e-08
Tmem37	6.34301e-16	-0.650903	0.068	0.359	1.34681e-11
Mrtfb	1.57727e-12	-0.650618	0.409	0.595	3.34901e-08
Tmem131l	1.34016e-13	-0.650077	0.227	0.417	2.84557e-09
Fhit	1.64629e-09	-0.649925	0.045	0.141	3.49557e-05
Smg1	3.78731e-14	-0.649851	0.709	0.814	8.04159e-10
Kidins220	3.9656e-13	-0.649324	0.536	0.677	8.42015e-09
Wls	1.87877e-14	-0.649219	0.859	0.95	3.98919e-10
Plxna4	2.31022e-09	-0.646345	0.15	0.296	4.9053e-05
Sqstm1	1.27612e-12	-0.646241	0.895	0.987	2.70958e-08
Herc4	9.72996e-14	-0.645908	0.464	0.59	2.06596e-09
Serinc5	1.12567e-11	-0.645626	0.318	0.453	2.39014e-07
Wdfy3	4.85745e-13	-0.64481	0.573	0.666	1.03138e-08
Prkd1	2.74921e-09	-0.643008	0.15	0.234	5.8374e-05
Sema5a	2.05951e-07	-0.641813	0.423	0.399	0.00437295
Osbpl9	7.62747e-12	-0.641527	0.736	0.837	1.61954e-07
Daam1	3.77586e-10	-0.641162	0.718	0.858	8.01729e-06
Camsap2	1.36731e-15	-0.640362	0.486	0.659	2.90321e-11
Arhgap21	2.22649e-12	-0.638849	0.705	0.768	4.72751e-08
Gab1	1.56007e-15	-0.638278	0.286	0.549	3.31251e-11
Ppp1r12b	9.99089e-11	-0.636654	0.409	0.527	2.12137e-06
Homer1	3.36338e-10	-0.635372	0.464	0.598	7.14147e-06
Scfd2	2.7947e-12	-0.635059	0.218	0.377	5.93399e-08
Rnf19b	7.5688e-11	-0.633435	0.836	0.905	1.60708e-06
Runx1t1	1.6294e-09	-0.630765	0.418	0.509	3.4597e-05
Iqgap1	6.92398e-15	-0.629442	0.923	0.988	1.47017e-10
2210408F21Rik	4.35755e-10	-0.629048	0.241	0.356	9.25238e-06
Man1a	5.98842e-07	-0.62777	0.814	0.795	0.0127152
Col5a1	5.14369e-16	-0.626251	0.959	0.998	1.09216e-11
Rab31	6.21712e-14	-0.625903	0.586	0.781	1.32008e-09
Mdfic	1.38667e-10	-0.625347	0.695	0.817	2.94431e-06
Zbtb7c	1.02164e-10	-0.625286	0.273	0.47	2.16924e-06
Arhgap23	1.63306e-12	-0.62469	0.582	0.724	3.46748e-08
Gigyf2	6.80217e-14	-0.624468	0.691	0.781	1.44431e-09
Peak1	1.37831e-09	-0.623957	0.777	0.823	2.92656e-05
Armh3	4.93257e-14	-0.622561	0.145	0.348	1.04733e-09
Cnot4	4.25648e-13	-0.621752	0.7	0.795	9.03778e-09
Smurf1	1.74256e-12	-0.620654	0.664	0.77	3.69997e-08
Ice1	1.34903e-12	-0.61764	0.532	0.697	2.86441e-08
Tlk2	1.21655e-13	-0.616364	0.636	0.735	2.58309e-09
Ammecr1	2.68844e-10	-0.615892	0.591	0.73	5.70837e-06
Kcnma1	2.70607e-08	-0.615406	0.014	0.11	0.000574579
Cplane1	1.39237e-12	-0.615301	0.5	0.652	2.95641e-08
Ppp1r12a	1.3279e-12	-0.614875	0.845	0.917	2.81952e-08
Kdm4c	2.52989e-14	-0.614424	0.223	0.437	5.37171e-10
Kif13b	1.59213e-11	-0.614367	0.418	0.562	3.38057e-07
Ago3	1.18789e-10	-0.612072	0.482	0.618	2.52224e-06
Braf	3.44657e-11	-0.611801	0.586	0.666	7.3181e-07
Prdm5	3.07833e-12	-0.610068	0.509	0.662	6.53621e-08
Kdm3a	2.207e-13	-0.609979	0.505	0.676	4.68613e-09
Tpm2	4.47446e-07	-0.609657	0.859	0.958	0.00950062
C1qa	9.79176e-10	-0.609384	0.091	0.218	2.07908e-05
Fnbp1	8.9061e-14	-0.609039	0.45	0.678	1.89103e-09
Slc20a1	2.56877e-08	-0.608829	0.514	0.699	0.000545427
Gata6	4.92886e-13	-0.607946	0.777	0.929	1.04655e-08
Smyd3	1.26856e-10	-0.607205	0.245	0.365	2.69353e-06
C1qb	9.53181e-10	-0.606616	0.145	0.319	2.02389e-05
Itch	3.84214e-12	-0.604731	0.668	0.804	8.15802e-08
Kansl1l	7.66599e-10	-0.604661	0.377	0.507	1.62772e-05
Lncppara	5.70001e-14	-0.604604	0.068	0.29	1.21028e-09
Adam12	1.95374e-07	-0.604366	0.795	0.874	0.00414839
Fto	4.36189e-12	-0.60412	0.645	0.761	9.26161e-08
Ubr5	7.53442e-13	-0.603952	0.832	0.892	1.59978e-08
Galnt17	8.3225e-12	-0.603263	0.2	0.355	1.76712e-07
Cdc42bpa	2.53991e-12	-0.603101	0.755	0.834	5.39299e-08
Cdk6	8.09904e-09	-0.602881	0.568	0.707	0.000171967
2610307P16Rik	2.92918e-10	-0.602351	0.023	0.177	6.21952e-06
Nbeal1	3.84908e-12	-0.600898	0.75	0.862	8.17275e-08
Tnks	4.65291e-14	-0.598786	0.645	0.772	9.87953e-10
Tcf20	1.42162e-12	-0.598786	0.355	0.526	3.01854e-08
Filip1l	6.28346e-10	-0.595808	0.632	0.776	1.33417e-05
Tsc1	1.28556e-14	-0.594046	0.464	0.642	2.72962e-10
Tln2	4.8389e-09	-0.593719	0.768	0.881	0.000102744
Sesn1	5.3522e-14	-0.593338	0.232	0.446	1.13643e-09
Fgfr1	2.23852e-11	-0.59283	0.936	0.985	4.75306e-07
Cdyl2	3.62329e-12	-0.591303	0.191	0.388	7.69334e-08
Crebbp	1.25315e-13	-0.591111	0.832	0.916	2.66082e-09
Eml1	2.33511e-09	-0.588386	0.536	0.655	4.95814e-05
Ror2	1.86355e-12	-0.587734	0.227	0.419	3.95687e-08
Gse1	6.00417e-11	-0.586827	0.182	0.34	1.27486e-06
Eda	2.50583e-08	-0.586166	0.141	0.227	0.000532062
Akap10	3.43919e-12	-0.585869	0.241	0.416	7.30242e-08
Fyn	2.82179e-09	-0.58518	0.759	0.829	5.9915e-05
Ube2g1	2.39302e-11	-0.584782	0.614	0.745	5.0811e-07
Col3a1	4.87465e-11	-0.584335	0.995	1	1.03503e-06
Crybg3	1.41837e-10	-0.584242	0.364	0.486	3.01162e-06
Notch2	6.79652e-11	-0.584229	0.641	0.732	1.44311e-06
Mllt10	1.57248e-10	-0.583568	0.514	0.625	3.33885e-06
Pag1	1.68296e-09	-0.582426	0.268	0.391	3.57343e-05
Rps6ka5	1.27341e-11	-0.579124	0.118	0.295	2.70382e-07
Fgfr2	7.95174e-11	-0.57825	0.114	0.375	1.68839e-06
Rmnd5a	1.34298e-11	-0.577685	0.564	0.658	2.85156e-07
Pi4ka	1.37342e-10	-0.577642	0.591	0.669	2.91617e-06
Tead1	8.24046e-10	-0.57753	0.832	0.926	1.7497e-05
Neat1	3.42019e-09	-0.577327	0.941	0.988	7.26209e-05
Dyrk1a	4.3065e-11	-0.574584	0.614	0.725	9.14399e-07
Rflnb	2.55808e-09	-0.574015	0.332	0.507	5.43156e-05
Zfp608	7.84092e-09	-0.57352	0.268	0.41	0.000166486
Dhx40	4.18226e-11	-0.573472	0.636	0.772	8.88019e-07
Disp1	4.23246e-11	-0.572081	0.291	0.468	8.98679e-07
1810013L24Rik	1.41607e-12	-0.571754	0.659	0.789	3.00674e-08
Plekhm2	3.53775e-11	-0.571687	0.591	0.715	7.51171e-07
Slc7a5	3.75292e-11	-0.571032	0.245	0.484	7.96857e-07
Usp34	3.38022e-12	-0.570397	0.859	0.936	7.17722e-08
St7	1.5126e-10	-0.57037	0.509	0.622	3.21171e-06
Eif2ak4	2.25415e-11	-0.570232	0.305	0.477	4.78623e-07
Gm32618	3.85092e-13	-0.570101	0.118	0.329	8.17665e-09
Arhgap32	8.03086e-10	-0.569897	0.495	0.633	1.70519e-05
Clip1	2.12086e-11	-0.566247	0.709	0.833	4.50323e-07
Eml4	5.15241e-12	-0.565699	0.55	0.708	1.09401e-07
Pbx3	1.45751e-09	-0.565036	0.414	0.5	3.09473e-05
Apaf1	9.87442e-11	-0.564547	0.545	0.68	2.09663e-06
Atf7	1.85696e-11	-0.564383	0.591	0.704	3.94289e-07
Ccdc88a	5.37498e-11	-0.564249	0.814	0.893	1.14127e-06
Zmym4	7.37915e-12	-0.563054	0.427	0.598	1.56682e-07
Atxn7	1.6178e-10	-0.561248	0.609	0.746	3.43507e-06
Prr14l	1.24294e-10	-0.560485	0.35	0.478	2.63913e-06
Gm49890	9.07931e-10	-0.560403	0.023	0.169	1.92781e-05
Rab8b	1.99702e-08	-0.560314	0.745	0.799	0.000424028
Farp2	1.87966e-13	-0.560291	0.118	0.34	3.99107e-09
Fer	1.59394e-09	-0.560107	0.586	0.673	3.38441e-05
Atf2	1.94818e-11	-0.559924	0.677	0.748	4.13656e-07
Plekhm3	3.3524e-11	-0.559517	0.295	0.433	7.11815e-07
Tmtc1	2.31054e-08	-0.557965	0.218	0.336	0.000490596
Sgms2	1.02588e-08	-0.557841	0.605	0.692	0.000217826
1700016P03Rik	3.08283e-12	-0.557376	0.059	0.246	6.54577e-08
Msantd2	1.50004e-11	-0.557089	0.377	0.526	3.18503e-07
Cmtm4	2.85073e-11	-0.555046	0.282	0.481	6.05295e-07
Lama2	1.72616e-07	-0.554704	0.818	0.878	0.00366517
Map2k4	7.22987e-10	-0.55447	0.573	0.737	1.53512e-05
Atp8b1	1.57038e-08	-0.554052	0.673	0.808	0.00033344
Prickle2	4.43457e-08	-0.553975	0.268	0.337	0.000941592
Ap3b1	4.35357e-11	-0.553949	0.705	0.824	9.24393e-07
Macf1	3.87863e-11	-0.553417	0.886	0.941	8.23549e-07
Nfat5	7.42936e-10	-0.552847	0.786	0.875	1.57748e-05
Frmd6	6.19714e-09	-0.552148	0.832	0.909	0.000131584
Shroom4	1.13399e-10	-0.551198	0.064	0.201	2.4078e-06
Ubtd2	3.74511e-10	-0.550438	0.436	0.589	7.95199e-06
Tlk1	5.3229e-12	-0.549795	0.577	0.731	1.13021e-07
Bmpr1b	1.83912e-08	-0.548717	0.036	0.133	0.000390501
Tgfb3	3.9317e-09	-0.548413	0.659	0.783	8.34818e-05
Frs2	4.7755e-11	-0.547015	0.523	0.642	1.01398e-06
Gm15564	2.96796e-11	-0.546899	0.023	0.29	6.30186e-07
Eea1	8.75533e-11	-0.546691	0.791	0.913	1.85902e-06
Serpina3g	2.31102e-07	-0.54669	0.114	0.272	0.00490699
Pde7a	2.304e-10	-0.546257	0.364	0.527	4.89209e-06
Arfgef2	1.91103e-10	-0.54624	0.395	0.568	4.05769e-06
Fbxo32	7.9624e-10	-0.545505	0.273	0.474	1.69066e-05
Stk10	2.50721e-11	-0.544781	0.136	0.323	5.32356e-07
Stx3	1.5102e-11	-0.543533	0.414	0.618	3.2066e-07
Hist1h2ap	5.66649e-09	-0.54351	0.191	0.392	0.000120317
Stk3	4.92089e-10	-0.542755	0.541	0.633	1.04485e-05
Ssbp2	3.41281e-09	-0.541949	0.714	0.787	7.24642e-05
Zfp280d	3.10907e-11	-0.541617	0.455	0.63	6.60149e-07
Lcorl	7.89701e-10	-0.541425	0.159	0.334	1.67677e-05
Dusp10	2.67804e-07	-0.54091	0.659	0.786	0.00568629
Fam222b	2.02584e-10	-0.540858	0.355	0.489	4.30146e-06
Tnrc6b	2.54552e-09	-0.540594	0.668	0.772	5.40491e-05
Atad2b	6.762e-11	-0.540303	0.445	0.624	1.43578e-06
Tom1	7.61753e-11	-0.539903	0.395	0.544	1.61743e-06
Elf1	8.52514e-09	-0.539656	0.75	0.882	0.000181014
Pde3b	8.98466e-08	-0.538699	0.373	0.443	0.00190771
Slc24a3	2.60188e-10	-0.53793	0.036	0.184	5.52457e-06
Myo6	1.23104e-10	-0.537348	0.436	0.594	2.61386e-06
Ecm2	1.14834e-08	-0.537274	0.482	0.685	0.000243826
Eya3	1.08076e-11	-0.535908	0.25	0.417	2.29478e-07
Kif2a	3.89248e-09	-0.533517	0.805	0.841	8.2649e-05
Fcho2	2.7958e-11	-0.531693	0.645	0.774	5.93633e-07
Sec24d	6.37527e-09	-0.530961	0.877	0.93	0.000135366
Erbin	5.85985e-10	-0.530916	0.723	0.817	1.24422e-05
Creb3l2	1.09817e-08	-0.530831	0.886	0.93	0.000233173
Arid4b	7.37005e-10	-0.530543	0.814	0.892	1.56488e-05
Nln	3.10747e-10	-0.530105	0.377	0.573	6.59808e-06
Lrrk2	7.8613e-09	-0.52942	0.418	0.5	0.000166919
Rbm26	4.48382e-11	-0.52915	0.668	0.81	9.52049e-07
Carmil1	1.09782e-08	-0.527968	0.395	0.495	0.000233101
Fars2	1.73208e-10	-0.526411	0.5	0.61	3.67772e-06
Npepps	5.55419e-10	-0.52635	0.741	0.828	1.17932e-05
Myof	8.51852e-09	-0.526025	0.809	0.919	0.000180874
Zfp385b	4.7589e-08	-0.523825	0.141	0.256	0.00101046
Nup210l	3.30599e-11	-0.522435	0.041	0.227	7.01961e-07
Atp6v1b2	5.25392e-08	-0.522194	0.732	0.801	0.00111557
Nrf1	6.83171e-10	-0.521849	0.491	0.638	1.45058e-05
Sh3rf3	4.7217e-11	-0.520885	0.141	0.32	1.00256e-06
C1qtnf6	2.66771e-10	-0.519546	0.832	0.977	5.66435e-06
Dennd4a	1.67191e-06	-0.519476	0.691	0.788	0.0354997
Dusp16	1.96092e-09	-0.517948	0.545	0.684	4.16361e-05
Atg13	6.38488e-10	-0.517199	0.523	0.648	1.3557e-05
Dnajc1	2.23006e-10	-0.516772	0.859	0.954	4.73508e-06
Tbc1d23	2.08798e-10	-0.516654	0.623	0.712	4.4334e-06
Pdgfrl	4.75385e-07	-0.515227	0.668	0.885	0.0100939
Fchsd2	4.19959e-09	-0.515063	0.391	0.486	8.91699e-05
Nhsl2	5.67271e-08	-0.514381	0.1	0.189	0.00120449
Lyst	2.71254e-09	-0.513153	0.423	0.513	5.75954e-05
Ubr3	4.82382e-10	-0.512665	0.6	0.7	1.02424e-05
Elf4	5.02888e-10	-0.511467	0.391	0.527	1.06778e-05
Kdm6a	1.08171e-08	-0.50824	0.455	0.55	0.000229678
Ehmt1	1.78339e-09	-0.508179	0.495	0.655	3.78667e-05
Zfp609	9.36832e-10	-0.507391	0.3	0.434	1.98918e-05
Itsn2	2.43647e-09	-0.507254	0.573	0.684	5.17337e-05
Cdh11	1.15236e-06	-0.507083	0.364	0.623	0.0244681
Zdhhc14	1.37444e-07	-0.505654	0.186	0.242	0.00291835
Larp4b	2.14756e-10	-0.505425	0.759	0.878	4.55991e-06
Plce1	1.75207e-07	-0.504836	0.382	0.495	0.00372016
Sfmbt1	2.5527e-10	-0.504079	0.227	0.404	5.42015e-06
Vps13d	2.69812e-10	-0.50306	0.473	0.576	5.72892e-06
Dock4	1.05463e-08	-0.501705	0.155	0.281	0.00022393
Soga1	6.56738e-11	-0.500811	0.2	0.399	1.39445e-06
Arhgap12	1.33948e-09	-0.500717	0.368	0.491	2.84412e-05
Med13l	2.90491e-10	-0.500616	0.818	0.912	6.168e-06
Lrch1	2.08936e-10	-0.500565	0.109	0.258	4.43633e-06
Fat1	1.4249e-08	-0.499864	0.795	0.899	0.000302549
Cdk17	8.69121e-08	-0.499222	0.568	0.663	0.0018454
Fbn2	1.97551e-07	-0.498311	0.336	0.626	0.0041946
Usp13	1.89305e-09	-0.498261	0.218	0.412	4.01952e-05
C1qc	1.84047e-09	-0.49758	0.05	0.183	3.90787e-05
Rock2	3.62064e-08	-0.497555	0.945	0.991	0.00076877
Gnaq	1.19785e-08	-0.497121	0.682	0.756	0.000254339
Celf2	2.32131e-06	-0.497112	0.859	0.93	0.0492883
Snd1	4.62452e-08	-0.496563	0.832	0.867	0.000981923
Angpt1	5.69957e-08	-0.496531	0.186	0.307	0.00121019
Rngtt	8.98991e-10	-0.49644	0.318	0.459	1.90883e-05
Zfp53	2.4121e-09	-0.494963	0.241	0.389	5.12162e-05
Dlgap4	3.0944e-10	-0.494685	0.845	0.911	6.57034e-06
Ncoa2	2.37991e-08	-0.49352	0.373	0.491	0.000505327
Strbp	2.18448e-10	-0.493268	0.25	0.431	4.6383e-06
Ecpas	5.99931e-08	-0.492901	0.745	0.814	0.00127383
Slmap	3.34426e-09	-0.491936	0.586	0.712	7.10086e-05
Dennd6a	2.45012e-10	-0.491822	0.432	0.569	5.20233e-06
Srgap3	1.65654e-10	-0.491811	0.159	0.355	3.51733e-06
Sppl3	2.40863e-10	-0.491541	0.745	0.816	5.11423e-06
Asxl2	3.36392e-09	-0.489194	0.414	0.559	7.14261e-05
Ston1	2.04345e-12	-0.489029	0.086	0.311	4.33886e-08
Itpr1	8.55277e-08	-0.487367	0.673	0.74	0.00181601
Azin2	1.48559e-08	-0.487094	0.314	0.491	0.000315434
Traf3	9.38645e-08	-0.48642	0.473	0.56	0.00199302
Pias1	5.49307e-10	-0.486211	0.418	0.596	1.16634e-05
Kif13a	2.62005e-09	-0.48549	0.336	0.477	5.56315e-05
Dennd1b	1.33847e-08	-0.485272	0.432	0.544	0.000284197
Med13	2.56627e-08	-0.484943	0.741	0.821	0.000544896
Stam	2.07693e-09	-0.484518	0.468	0.621	4.40994e-05
Kdm5b	5.29619e-09	-0.484023	0.705	0.816	0.000112454
Syne2	1.58506e-06	-0.48294	0.695	0.735	0.0336557
Apba1	3.90502e-07	-0.482716	0.318	0.335	0.00829153
Tanc1	1.02887e-08	-0.482184	0.423	0.556	0.00021846
Zbtb11	6.73615e-08	-0.481548	0.514	0.623	0.00143029
Akap6	1.68242e-09	-0.481137	0.068	0.214	3.57229e-05
Slc10a7	1.45712e-08	-0.48074	0.345	0.47	0.00030939
8030451A03Rik	5.53733e-09	-0.4786	0.018	0.164	0.000117574
Atxn2	7.7093e-10	-0.478052	0.659	0.829	1.63692e-05
Micu3	7.41608e-09	-0.477692	0.332	0.477	0.000157466
Laptm4b	1.59481e-07	-0.477328	0.595	0.677	0.00338625
Scmh1	3.66426e-08	-0.477213	0.427	0.559	0.000778032
Rb1	7.24626e-09	-0.476227	0.291	0.425	0.00015386
Arfgap3	1.64156e-08	-0.476079	0.782	0.84	0.000348552
Zfp827	1.22688e-10	-0.475596	0.123	0.315	2.60504e-06
Rnf38	1.0918e-09	-0.475061	0.309	0.493	2.31822e-05
Usp9x	1.16722e-08	-0.47417	0.841	0.945	0.000247835
Ip6k1	7.23038e-10	-0.474083	0.595	0.717	1.53523e-05
Myo9b	8.71723e-10	-0.473779	0.714	0.802	1.85093e-05
Med14	6.95149e-09	-0.47371	0.486	0.656	0.000147601
Trim33	3.21652e-09	-0.473412	0.445	0.594	6.82964e-05
Agps	1.20177e-08	-0.473323	0.568	0.667	0.000255171
Arhgap31	2.31e-06	-0.472979	0.723	0.819	0.0490482
Dnmbp	2.12227e-09	-0.472775	0.205	0.375	4.50623e-05
Rnf115	6.26758e-09	-0.471828	0.545	0.665	0.00013308
Gpatch2	4.23903e-10	-0.470509	0.305	0.484	9.00072e-06
Dis3l2	1.56004e-08	-0.470439	0.264	0.391	0.000331244
Adamtsl3	1.86265e-06	-0.470367	0.414	0.522	0.0395496
Zcchc7	8.16227e-08	-0.470055	0.768	0.793	0.0017331
Nipbl	3.54112e-09	-0.46996	0.818	0.897	7.51887e-05
Fbxo38	8.8075e-10	-0.469909	0.4	0.576	1.8701e-05
Ttc7b	6.89902e-09	-0.469751	0.282	0.427	0.000146487
Neo1	4.79868e-09	-0.468738	0.541	0.714	0.00010189
Lrig1	1.72278e-06	-0.468727	0.559	0.645	0.0365798
Pde8a	2.83182e-07	-0.467547	0.423	0.541	0.00601279
Evl	3.62298e-08	-0.467336	0.509	0.639	0.000769268
Ranbp9	3.6462e-08	-0.467176	0.582	0.657	0.000774197
Trpm7	1.50208e-08	-0.466647	0.682	0.788	0.000318937
Bcl2l11	4.30443e-09	-0.465978	0.209	0.419	9.1396e-05
Sgms1	2.85685e-07	-0.465782	0.523	0.591	0.00606594
Cspp1	8.45305e-09	-0.4655	0.509	0.703	0.000179484
Wdr33	1.79194e-09	-0.465332	0.664	0.8	3.80483e-05
Tcf7l2	2.42761e-07	-0.465155	0.586	0.672	0.00515454
Vcl	7.20054e-07	-0.463151	0.795	0.913	0.0152889
Tet3	1.97403e-08	-0.461956	0.559	0.684	0.000419146
Zfp704	1.81515e-07	-0.461741	0.441	0.513	0.00385411
Usp24	1.93366e-08	-0.461174	0.627	0.696	0.000410575
Yars	1.7966e-07	-0.46062	0.591	0.699	0.00381472
Ssh2	4.45851e-07	-0.460418	0.564	0.652	0.00946676
Ripk2	7.76511e-08	-0.460406	0.336	0.494	0.00164876
Foxo3	7.17299e-08	-0.459927	0.436	0.585	0.00152304
Heca	4.66304e-09	-0.458927	0.523	0.687	9.90103e-05
Micu2	5.85741e-09	-0.458702	0.568	0.713	0.00012437
Glcci1	7.15522e-08	-0.458025	0.318	0.437	0.00151927
Usp25	5.48413e-08	-0.457978	0.691	0.755	0.00116445
Heatr5a	6.26841e-07	-0.457591	0.668	0.77	0.0133097
Rnf150	7.33702e-07	-0.457144	0.6	0.711	0.0155787
Purg	6.52083e-11	-0.456529	0.127	0.333	1.38457e-06
Sec24b	5.28046e-09	-0.456012	0.691	0.778	0.00011212
Cd40	8.13838e-08	-0.455245	0.195	0.375	0.00172802
Rasa2	1.03139e-06	-0.454727	0.655	0.775	0.0218995
Lims1	7.80951e-07	-0.454258	0.832	0.896	0.0165819
Ctxn1	8.25124e-10	-0.453875	0.132	0.35	1.75199e-05
Dysf	3.53607e-10	-0.453326	0.132	0.31	7.50813e-06
Atxn7l1	2.02065e-07	-0.452281	0.3	0.409	0.00429044
Ubn2	2.55437e-07	-0.450312	0.85	0.895	0.0054237
Gucy1b1	2.28764e-07	-0.449909	0.386	0.542	0.00485736
Itpr2	8.73877e-08	-0.449739	0.518	0.67	0.0018555
Setd5	1.16729e-07	-0.449643	0.764	0.833	0.00247851
Pik3r3	6.95496e-10	-0.449601	0.086	0.238	1.47675e-05
Dok6	1.3252e-07	-0.447996	0.068	0.158	0.00281379
Sh3pxd2a	3.125e-08	-0.447518	0.723	0.852	0.000663531
Hivep1	1.47634e-07	-0.447381	0.527	0.696	0.0031347
Arfgef1	7.15317e-09	-0.447267	0.718	0.865	0.000151883
Rcor1	1.44278e-07	-0.446946	0.609	0.722	0.00306345
Nck2	8.11126e-09	-0.446623	0.218	0.364	0.000172226
Rb1cc1	1.50995e-08	-0.445698	0.832	0.932	0.000320607
Zdhhc20	1.86702e-09	-0.445663	0.777	0.912	3.96424e-05
Gramd3	6.70005e-07	-0.445126	0.577	0.676	0.0142262
Serpinf1	6.50654e-07	-0.445094	0.914	0.984	0.0138153
Spata6	3.48973e-07	-0.444543	0.573	0.666	0.00740975
Epc1	1.51471e-08	-0.443682	0.614	0.775	0.000321619
Pou2f1	9.27318e-09	-0.443056	0.355	0.479	0.000196897
Tex2	1.40652e-07	-0.441896	0.323	0.419	0.00298646
Rc3h1	3.94282e-07	-0.441744	0.75	0.804	0.00837179
Slc4a7	8.10875e-07	-0.44137	0.609	0.717	0.0172173
Serf1	1.35112e-07	-0.440985	0.795	0.877	0.00286882
Trip12	9.6355e-08	-0.439692	0.85	0.93	0.00204591
Kpna4	3.29751e-07	-0.439486	0.836	0.876	0.00700161
Ube2h	5.2717e-07	-0.439439	0.745	0.814	0.0111934
Xrn1	2.19643e-08	-0.439388	0.523	0.696	0.000466368
Sgpl1	1.22393e-08	-0.437972	0.582	0.719	0.000259878
Myo1b	4.21447e-07	-0.437873	0.45	0.697	0.00894857
Ogt	1.28446e-07	-0.436563	0.741	0.83	0.00272728
Sos2	2.22272e-08	-0.436022	0.336	0.45	0.00047195
Brd4	7.70734e-09	-0.435957	0.85	0.919	0.00016365
Prdm2	1.84654e-08	-0.435863	0.609	0.738	0.000392077
Lin52	4.10142e-09	-0.435295	0.064	0.208	8.70855e-05
Hdac4	2.55877e-08	-0.435265	0.564	0.662	0.000543303
Aak1	1.49883e-07	-0.435147	0.618	0.68	0.00318248
Cdkal1	9.44693e-08	-0.434501	0.323	0.438	0.00200587
Celf1	2.38578e-08	-0.433792	0.745	0.852	0.000506573
Sparc	9.2364e-08	-0.431274	1	1	0.00196116
Tnks2	4.20178e-08	-0.429774	0.8	0.849	0.000892165
Igf2r	1.03984e-08	-0.429284	0.85	0.956	0.00022079
Rps6ka2	3.7015e-07	-0.427808	0.1	0.2	0.0078594
Dennd5b	2.14675e-06	-0.42755	0.459	0.547	0.045582
Apc	1.50302e-07	-0.426693	0.614	0.726	0.00319136
Wwp2	1.5252e-08	-0.424784	0.336	0.522	0.000323846
Rab11fip3	2.46787e-08	-0.424493	0.259	0.376	0.000524004
Sh3rf1	9.98443e-07	-0.423587	0.409	0.519	0.0211999
Zmym2	1.21596e-08	-0.422911	0.395	0.543	0.000258186
Gpr137b	2.04745e-09	-0.422128	0.286	0.522	4.34736e-05
Cdk13	1.02696e-07	-0.420503	0.695	0.813	0.00218053
Vps54	1.85407e-07	-0.420503	0.4	0.509	0.00393674
Hs2st1	9.85647e-07	-0.420149	0.677	0.786	0.0209283
Rictor	2.58816e-07	-0.419007	0.655	0.744	0.00549544
Mkln1	2.08685e-07	-0.418399	0.814	0.857	0.00443101
Itprid2	3.93676e-07	-0.418307	0.618	0.734	0.00835893
Chm	1.22837e-07	-0.417635	0.4	0.542	0.0026082
Enox1	3.17213e-08	-0.416936	0.086	0.204	0.000673538
Eps15l1	8.11051e-08	-0.414304	0.509	0.595	0.0017221
Ranbp17	6.09861e-09	-0.414148	0.027	0.184	0.000129492
Ubap1	1.80417e-06	-0.413317	0.623	0.694	0.0383079
Fryl	8.79762e-07	-0.413024	0.409	0.493	0.01868
Dmd	1.72335e-06	-0.41279	0.318	0.419	0.0365919
Banp	1.28281e-08	-0.412654	0.291	0.456	0.00027238
Megf10	9.8231e-07	-0.412159	0.15	0.286	0.0208574
Zfhx3	9.49331e-07	-0.412154	0.727	0.869	0.0201571
Srpk2	2.55018e-07	-0.412062	0.709	0.823	0.00541479
0610010F05Rik	1.44049e-07	-0.412011	0.255	0.348	0.00305859
A330023F24Rik	2.64552e-09	-0.411699	0.055	0.201	5.61724e-05
Xpo7	1.41963e-07	-0.411693	0.477	0.633	0.00301431
Nploc4	1.79657e-07	-0.411185	0.491	0.578	0.00381465
Ubr2	9.98103e-08	-0.410616	0.645	0.737	0.00211927
Adcy2	8.30696e-07	-0.410441	0.027	0.103	0.0176382
Cast	4.85785e-07	-0.409388	0.909	0.972	0.0103147
Sdk2	5.97147e-09	-0.408571	0.118	0.267	0.000126792
Ttc17	1.32484e-07	-0.407588	0.495	0.602	0.00281303
Mtcl1	1.0823e-08	-0.405683	0.145	0.314	0.000229806
Cpeb4	1.50708e-06	-0.405388	0.514	0.65	0.0319998
4931406P16Rik	1.67208e-07	-0.405318	0.664	0.819	0.00355032
Znrf3	4.12746e-08	-0.405078	0.159	0.302	0.000876384
Atrn	4.15383e-07	-0.404604	0.482	0.584	0.00881983
Pdia5	1.77094e-07	-0.402938	0.732	0.862	0.00376024
Lgr4	2.66582e-07	-0.402697	0.214	0.347	0.00566033
Ell	5.66874e-07	-0.401669	0.514	0.616	0.0120364
Adgrl1	1.24666e-08	-0.401422	0.486	0.686	0.000264704
Cenpc1	5.47134e-07	-0.401416	0.373	0.529	0.0116173
Ino80d	7.58612e-07	-0.401308	0.709	0.754	0.0161076
Ythdf3	7.41027e-07	-0.401073	0.7	0.755	0.0157342
Atf7ip	9.66105e-07	-0.400819	0.591	0.678	0.0205133
Map4k3	6.38352e-07	-0.400433	0.382	0.543	0.0135541
Rsf1	2.12026e-07	-0.39918	0.605	0.775	0.00450194
Wars2	1.03154e-08	-0.399066	0.173	0.313	0.000219026
Nckap5	3.79149e-08	-0.397871	0.027	0.153	0.000805047
Tango6	1.22577e-06	-0.397551	0.227	0.349	0.0260269
Sgtb	1.94554e-07	-0.397215	0.25	0.417	0.00413097
1600020E01Rik	6.14959e-07	-0.397117	0.264	0.365	0.0130574
Bmt2	1.16171e-06	-0.397084	0.373	0.489	0.0246666
Senp5	2.26655e-06	-0.396313	0.559	0.68	0.0481256
Phldb1	1.80601e-06	-0.395097	0.786	0.831	0.038347
Chd6	1.36812e-06	-0.395021	0.559	0.649	0.0290492
Hectd2	6.23055e-07	-0.394924	0.336	0.426	0.0132293
Dnmt3a	3.51275e-07	-0.394258	0.35	0.513	0.00745863
Hspbap1	2.25138e-08	-0.393968	0.214	0.375	0.000478036
Map2k5	1.59838e-06	-0.393706	0.559	0.693	0.0339383
Mlxip	3.63738e-07	-0.393454	0.445	0.556	0.00772324
Snx13	2.84868e-07	-0.39181	0.391	0.484	0.00604861
Ccnt2	8.26659e-08	-0.39179	0.577	0.672	0.00175525
Oga	1.21796e-06	-0.391369	0.764	0.848	0.025861
Ankib1	1.33971e-06	-0.391359	0.545	0.67	0.028446
Sipa1l1	9.60472e-07	-0.391281	0.218	0.337	0.0203937
Greb1l	2.19149e-07	-0.390366	0.109	0.23	0.00465318
Ston2	1.4576e-06	-0.38939	0.195	0.282	0.0309492
Kctd12	9.54683e-07	-0.389255	0.314	0.475	0.0202708
Gm16062	2.66486e-07	-0.389042	0.164	0.331	0.00565829
Sorcs2	5.40874e-07	-0.388341	0.373	0.576	0.0114844
Brwd1	5.42049e-07	-0.388096	0.773	0.847	0.0115093
Uvrag	1.724e-06	-0.386539	0.5	0.617	0.0366057
Fnbp1l	2.8196e-07	-0.385723	0.318	0.47	0.00598686
Lrrc15	1.7863e-07	-0.38548	0.018	0.132	0.00379285
Tnrc6c	1.53917e-07	-0.384626	0.782	0.861	0.00326813
Prkn	2.69484e-07	-0.384304	0.018	0.124	0.00572196
Ankrd11	4.11144e-07	-0.383075	0.918	0.972	0.00872981
Rbm41	1.54659e-09	-0.38214	0.073	0.247	3.28387e-05
Cwc27	5.78896e-07	-0.381883	0.441	0.541	0.0122917
Rbm33	4.14661e-07	-0.380724	0.659	0.738	0.0088045
Pcnx4	2.33775e-06	-0.380302	0.486	0.649	0.0496374
Polr2a	1.8322e-06	-0.379716	0.736	0.848	0.0389031
Jazf1	8.38206e-08	-0.378812	0.055	0.163	0.00177976
Cbfa2t2	2.41977e-07	-0.378742	0.327	0.468	0.00513789
Notch3	2.34835e-06	-0.37821	0.214	0.419	0.0498625
Lrba	2.59194e-07	-0.37801	0.195	0.303	0.00550346
Tbc1d12	3.2553e-07	-0.377723	0.382	0.526	0.00691198
Exoc2	4.52433e-07	-0.377496	0.359	0.473	0.00960651
Letm2	1.05514e-06	-0.377168	0.214	0.356	0.0224037
Foxj3	5.65858e-07	-0.377076	0.505	0.59	0.0120149
Cdk12	9.89692e-07	-0.375464	0.786	0.826	0.0210141
Stim2	1.57307e-06	-0.37231	0.605	0.665	0.0334011
Phlpp2	7.21235e-08	-0.371279	0.232	0.386	0.0015314
Eya2	1.40647e-07	-0.370569	0.168	0.329	0.00298635
Kdm5c	6.41576e-07	-0.369523	0.623	0.706	0.0136226
Scai	8.48172e-08	-0.369417	0.205	0.354	0.00180092
Cdip1	1.92267e-07	-0.369359	0.4	0.547	0.00408241
Snx25	1.37485e-07	-0.367372	0.182	0.307	0.00291921
Ldlrad3	9.07578e-07	-0.367131	0.273	0.39	0.0192706
Nectin2	1.19926e-06	-0.366135	0.25	0.422	0.0254639
Pdss2	4.69533e-07	-0.365196	0.223	0.315	0.00996959
Krit1	9.05887e-07	-0.364299	0.755	0.828	0.0192347
Tmem87a	1.53787e-07	-0.364197	0.264	0.393	0.00326535
Cacul1	1.17782e-06	-0.363541	0.418	0.526	0.0250087
AW554918	3.09525e-07	-0.362876	0.1	0.234	0.00657215
Xkr4	2.80756e-07	-0.36264	0.023	0.132	0.00596128
Vrk2	2.16942e-06	-0.362401	0.323	0.41	0.0460633
Rnf2	2.04388e-06	-0.36174	0.464	0.642	0.0433976
Zmym5	6.67323e-07	-0.360562	0.627	0.748	0.0141693
Spata1	2.48736e-08	-0.360399	0.077	0.234	0.000528142
Btbd7	2.27867e-06	-0.359578	0.795	0.882	0.048383
Zfp260	1.22419e-06	-0.359306	0.632	0.783	0.0259933
Lmbr1l	1.60302e-06	-0.358268	0.364	0.473	0.034037
Kmt5b	1.41423e-06	-0.357903	0.591	0.722	0.0300283
Pawr	5.17625e-07	-0.357841	0.045	0.171	0.0109907
Kdm4b	3.07234e-08	-0.356715	0.2	0.377	0.00065235
Osbpl11	3.37746e-07	-0.355077	0.473	0.602	0.00717136
Trappc8	2.15909e-06	-0.354796	0.455	0.535	0.0458439
Chd9	1.27225e-06	-0.353381	0.705	0.799	0.0270138
Pi4kb	9.42232e-07	-0.351008	0.355	0.482	0.0200064
Tmem86a	1.65454e-08	-0.347986	0.141	0.308	0.000351308
Pdpr	1.91975e-09	-0.347903	0.068	0.26	4.07621e-05
Eml6	1.13956e-06	-0.347903	0.068	0.152	0.0241963
Kat6a	1.06367e-06	-0.347329	0.559	0.711	0.0225848
Als2	1.28273e-08	-0.346972	0.086	0.24	0.000272362
Zfp654	1.92162e-06	-0.346459	0.236	0.326	0.0408017
Ptpn4	2.09368e-06	-0.344844	0.136	0.244	0.0444552
Usp6nl	1.36955e-06	-0.343807	0.286	0.404	0.0290797
A930015D03Rik	2.54734e-08	-0.342335	0.041	0.189	0.000540877
Megf11	1.74377e-06	-0.33966	0.032	0.118	0.0370255
Acvr2a	2.08154e-06	-0.337792	0.255	0.357	0.0441973
Phka2	1.51759e-06	-0.333536	0.114	0.267	0.0322231
Umad1	1.85865e-06	-0.332891	0.214	0.345	0.0394646
Mapk8ip3	1.81822e-06	-0.329987	0.441	0.588	0.0386064
Wrn	1.75171e-06	-0.325018	0.236	0.365	0.037194
Traf6	9.42601e-07	-0.323825	0.223	0.374	0.0200142
Bbs9	1.13684e-06	-0.321983	0.095	0.207	0.0241386
Syne3	4.3293e-07	-0.320303	0.064	0.18	0.0091924
Unkl	8.89707e-07	-0.314833	0.227	0.34	0.0188912
Stard9	1.11851e-06	-0.313825	0.164	0.301	0.0237493
Sugp2	4.84036e-07	-0.309986	0.223	0.375	0.0102775
2610020C07Rik	7.44487e-07	-0.305763	0.014	0.187	0.0158077
Il17rd	1.87923e-06	-0.302654	0.159	0.304	0.0399016
Etl4	2.34239e-06	-0.300176	0.055	0.17	0.049736
Usp28	2.17725e-07	-0.296541	0.091	0.234	0.00462295
Gm14325	3.47702e-07	-0.294329	0.082	0.234	0.00738276
Slc26a11	1.81322e-07	-0.290265	0.109	0.263	0.00385
Osbpl10	2.24729e-06	-0.289491	0.014	0.145	0.0477166
Zcchc4	1.06392e-06	-0.28013	0.109	0.258	0.0225903
Gm19951	1.78202e-06	-0.267459	0.036	0.152	0.0378376
Pomt2	7.48796e-07	0.251369	0.455	0.296	0.0158992
Ttc5	2.02168e-06	0.252877	0.45	0.279	0.0429264
Atpaf2	1.11438e-06	0.253417	0.409	0.258	0.0236616
Nol6	1.14459e-06	0.254676	0.368	0.248	0.0243032
Cd24a	8.38394e-08	0.256293	0.105	0.028	0.00178016
Tsen2	1.84421e-06	0.256958	0.341	0.213	0.039158
Gtf2h3	2.14181e-08	0.256982	0.359	0.194	0.00045477
Gstk1	1.57899e-09	0.257407	0.273	0.122	3.35267e-05
Gatc	2.23742e-08	0.259924	0.291	0.136	0.000475072
Armc6	6.51695e-07	0.261392	0.314	0.197	0.0138374
Abitram	3.85225e-07	0.265652	0.364	0.253	0.00817948
Nt5e	4.86481e-07	0.266974	0.182	0.08	0.0103294
1190007I07Rik	5.38099e-08	0.267295	0.309	0.197	0.00114255
Ecsit	1.11686e-06	0.267712	0.445	0.272	0.0237142
3930402G23Rik	4.04185e-07	0.267869	0.232	0.133	0.00858206
Dnaaf2	2.7412e-08	0.268677	0.259	0.131	0.00058204
Mthfsl	1.00437e-06	0.270623	0.391	0.275	0.0213258
Ptrh1	2.71558e-07	0.272781	0.414	0.258	0.00576599
Dbt	1.28284e-06	0.273167	0.323	0.232	0.0272386
Exosc2	1.2177e-09	0.273468	0.305	0.155	2.58555e-05
Wnt5a	6.30183e-07	0.274073	0.259	0.141	0.0133807
Smtnl2	9.90177e-07	0.274719	0.2	0.083	0.0210244
Rpe	2.18701e-06	0.275852	0.514	0.402	0.0464368
Ncdn	8.05801e-08	0.275931	0.345	0.193	0.00171096
Chmp7	2.25666e-07	0.276046	0.459	0.335	0.00479156
Stn1	9.78559e-07	0.276383	0.395	0.253	0.0207777
Wdr83	1.43476e-06	0.277271	0.464	0.343	0.0304643
Rom1	4.99286e-07	0.279987	0.373	0.204	0.0106013
Ankrd26	1.37012e-07	0.281853	0.245	0.131	0.00290917
Nabp1	6.85277e-07	0.282185	0.341	0.18	0.0145505
Arl6	1.03514e-07	0.283085	0.414	0.226	0.00219791
Ctbs	1.60962e-07	0.285169	0.405	0.275	0.00341771
Notch4	1.27851e-06	0.286631	0.3	0.167	0.0271467
Crat	6.83607e-07	0.288714	0.495	0.364	0.014515
Nudt1	2.57833e-08	0.289777	0.35	0.228	0.000547456
AC160336.1	8.57727e-08	0.289801	0.291	0.17	0.00182121
Grap	7.62457e-10	0.290332	0.186	0.052	1.61892e-05
Lipo3	7.12204e-07	0.290366	0.468	0.293	0.0151222
Mdfi	5.74286e-07	0.290588	0.291	0.187	0.0121938
Fpgs	2.66562e-07	0.291021	0.405	0.254	0.00565992
Mfap1b	2.92661e-07	0.291263	0.559	0.405	0.00621408
Acyp1	4.36027e-07	0.292178	0.427	0.315	0.00925816
Gpatch11	1.96908e-06	0.292733	0.377	0.259	0.0418096
Tmem199	4.42913e-08	0.295821	0.336	0.181	0.000940438
Pex6	3.29694e-07	0.29697	0.577	0.464	0.00700039
Isca2	1.22268e-07	0.297596	0.523	0.4	0.00259613
Ccdc115	1.95072e-07	0.299036	0.409	0.248	0.00414196
Hddc2	2.2117e-06	0.299703	0.505	0.383	0.0469611
Leo1	2.21674e-06	0.300095	0.564	0.416	0.047068
Spry4	3.58425e-08	0.300291	0.291	0.119	0.000761045
Ptgir	4.02751e-09	0.300511	0.268	0.138	8.55161e-05
Gtf2h4	1.2006e-07	0.300971	0.5	0.321	0.00254923
Loxl4	2.81839e-11	0.302908	0.241	0.091	5.98428e-07
Noa1	9.05186e-08	0.303211	0.414	0.256	0.00192198
Eef1akmt2	3.52107e-07	0.303545	0.491	0.369	0.00747629
Ccdc127	7.57459e-07	0.303898	0.764	0.737	0.0160831
Ifrd2	4.74903e-07	0.3043	0.386	0.267	0.0100836
Pold2	6.47081e-07	0.304307	0.414	0.278	0.0137395
Fen1	9.69696e-10	0.304442	0.232	0.112	2.05896e-05
Rnf5	1.15001e-08	0.304836	0.418	0.276	0.000244181
Dus1l	4.16229e-08	0.305383	0.4	0.255	0.000883779
Rab6b	3.35325e-08	0.30644	0.332	0.163	0.000711995
Smim12	1.01683e-06	0.307249	0.627	0.474	0.0215904
Gm10115	1.75874e-07	0.307829	0.327	0.152	0.00373434
Mad2l2	2.77589e-08	0.308102	0.391	0.265	0.000589405
Pdhb	5.75387e-07	0.308937	0.741	0.687	0.0122172
Fundc1	3.57609e-07	0.309034	0.491	0.417	0.00759312
Wfs1	5.36789e-09	0.309212	0.35	0.224	0.000113976
Dcaf11	5.96464e-09	0.309591	0.514	0.316	0.000126647
Noc4l	7.18197e-09	0.309709	0.418	0.27	0.000152495
Ap1m1	3.43364e-07	0.310027	0.632	0.568	0.00729066
Ormdl2	2.0687e-06	0.31006	0.441	0.289	0.0439247
Slc25a33	1.6409e-07	0.310084	0.395	0.206	0.00348412
Czib	1.63753e-06	0.310176	0.782	0.735	0.0347697
Sorl1	2.57473e-11	0.310651	0.15	0.039	5.46693e-07
Pigq	9.82847e-09	0.310939	0.473	0.328	0.000208688
B3gat3	2.01253e-06	0.310941	0.714	0.624	0.042732
Sdf4	1.8168e-06	0.312238	0.927	0.943	0.0385762
Vamp2	1.64825e-06	0.312349	0.668	0.566	0.0349974
Mob3c	7.9557e-10	0.313044	0.4	0.211	1.68923e-05
Coa6	8.7484e-07	0.313147	0.505	0.378	0.0185755
Uchl5	6.43764e-08	0.314055	0.473	0.322	0.0013669
Parp2	1.53554e-07	0.314518	0.464	0.299	0.00326041
Mccc1	9.6824e-11	0.315526	0.355	0.159	2.05586e-06
Bpnt1	2.14606e-08	0.315537	0.45	0.26	0.000455672
BC005624	2.02636e-06	0.315612	0.755	0.742	0.0430256
Ccdc47	1.68858e-06	0.316129	0.795	0.725	0.0358536
Pcyox1l	3.01057e-13	0.316183	0.227	0.076	6.39235e-09
Qdpr	5.87722e-07	0.317283	0.536	0.447	0.0124791
Lypla2	6.48413e-07	0.317738	0.523	0.371	0.0137678
Exosc7	3.96955e-08	0.317765	0.464	0.352	0.000842854
Rnf10	1.03722e-06	0.319262	0.877	0.903	0.0220234
Nup37	1.54444e-11	0.319303	0.341	0.153	3.27931e-07
Trmt61a	4.35366e-08	0.319303	0.341	0.184	0.000924413
Gfm1	1.21666e-07	0.31943	0.491	0.342	0.00258333
Dgcr6	1.72885e-06	0.319554	0.695	0.628	0.0367087
Txlna	1.89525e-06	0.319818	0.718	0.607	0.0402418
Rara	8.56325e-07	0.320089	0.441	0.294	0.0181823
Alg1	3.49704e-07	0.321763	0.605	0.474	0.00742527
Ddx54	2.35209e-06	0.321818	0.764	0.706	0.049942
Sac3d1	1.85724e-07	0.32208	0.432	0.3	0.00394348
Trnt1	6.11161e-07	0.322675	0.668	0.519	0.0129768
Tsku	1.88071e-06	0.322788	0.505	0.396	0.0399331
Ctdsp1	1.29296e-07	0.322831	0.686	0.568	0.00274535
Kat2a	2.31451e-08	0.323114	0.409	0.294	0.00049144
Yars2	6.02796e-09	0.323305	0.409	0.242	0.000127992
Mmut	3.96277e-09	0.323844	0.436	0.287	8.41416e-05
Mcrip2	3.43844e-08	0.323893	0.277	0.137	0.000730083
Sept8	1.92644e-06	0.325051	0.832	0.836	0.0409042
Ube2q1	8.22629e-07	0.325564	0.727	0.65	0.0174669
Ddx56	3.48423e-07	0.325788	0.5	0.357	0.00739807
Syde1	1.71443e-06	0.326378	0.495	0.372	0.0364025
Mlkl	2.23623e-06	0.32641	0.441	0.311	0.047482
9530068E07Rik	4.08459e-07	0.326738	0.923	0.934	0.0086728
Trir	1.8758e-06	0.326775	0.891	0.907	0.0398289
Trmt1	1.1605e-07	0.327085	0.7	0.576	0.0024641
Morf4l1	1.72943e-06	0.327184	0.964	0.992	0.0367211
Thoc3	9.34264e-08	0.328322	0.541	0.42	0.00198372
Nr1h2	3.73315e-08	0.328341	0.686	0.635	0.00079266
Upf1	4.32053e-08	0.328615	0.614	0.515	0.000917378
Ipo5	1.59345e-06	0.328989	0.818	0.799	0.0338338
3830406C13Rik	1.63559e-07	0.329776	0.564	0.47	0.00347285
Prpf38a	1.0739e-07	0.330003	0.65	0.541	0.00228021
Ggh	2.06019e-06	0.330547	0.823	0.794	0.0437441
Prmt5	5.29182e-07	0.330698	0.427	0.313	0.0112361
Blvra	5.41676e-08	0.330743	0.527	0.354	0.00115014
Znhit3	9.79242e-10	0.331242	0.364	0.221	2.07923e-05
Stt3b	1.44711e-06	0.331412	0.886	0.874	0.0307264
Klhl9	1.6737e-07	0.331725	0.686	0.656	0.00355377
Ctdnep1	6.26791e-07	0.331827	0.868	0.869	0.0133087
Nop9	2.38502e-08	0.332432	0.473	0.358	0.000506412
Gpn1	1.81844e-09	0.332554	0.455	0.272	3.86109e-05
Seh1l	1.50326e-07	0.33267	0.677	0.562	0.00319188
Hadhb	1.68757e-06	0.332881	0.777	0.745	0.0358322
Emc1	4.27425e-09	0.334152	0.564	0.398	9.07551e-05
Ubald1	8.8646e-07	0.33423	0.645	0.585	0.0188222
Itpa	1.60177e-06	0.33432	0.618	0.475	0.0340105
Lonp1	3.5888e-08	0.3344	0.577	0.472	0.000762009
Prps1	9.67465e-07	0.334472	0.473	0.331	0.0205422
Kctd10	2.34886e-06	0.334592	0.768	0.756	0.0498733
Senp3	2.12418e-08	0.334789	0.6	0.477	0.000451027
Lyrm2	1.16198e-06	0.33505	0.655	0.54	0.0246724
mt-Nd4	1.68106e-06	0.335856	0.955	0.999	0.035694
Dpp3	9.5695e-07	0.336423	0.641	0.546	0.0203189
Pwp1	1.09292e-06	0.337144	0.586	0.457	0.0232059
Mrpl38	1.52923e-06	0.337468	0.673	0.557	0.0324702
BC003965	2.5826e-07	0.337967	0.536	0.438	0.00548363
Pura	5.23142e-07	0.33815	0.882	0.892	0.0111079
Cebpz	8.4548e-07	0.338207	0.868	0.842	0.0179521
Eif1ad	1.39032e-06	0.338442	0.6	0.539	0.0295207
Hnrnpc	1.85614e-06	0.338541	0.955	0.957	0.0394113
Tbrg4	6.27214e-10	0.338603	0.509	0.299	1.33176e-05
Ino80e	3.9748e-07	0.33881	0.555	0.444	0.00843969
Rwdd4a	3.03804e-07	0.338884	0.641	0.496	0.00645068
Eif2s3x	1.49544e-07	0.339003	0.768	0.726	0.00317527
Tprkb	1.28924e-08	0.339186	0.459	0.31	0.000273744
Sf3a1	1.06632e-06	0.339561	0.595	0.465	0.0226411
Ift22	1.57549e-08	0.339566	0.577	0.396	0.000334524
Cfap298	1.49367e-07	0.339607	0.495	0.326	0.00317151
Emc3	6.91805e-07	0.339659	0.855	0.864	0.0146891
Polr2j	1.28261e-06	0.339999	0.827	0.823	0.0272337
Eif2a	5.7747e-07	0.340061	0.8	0.761	0.0122614
Ccdc167	3.79175e-07	0.340329	0.555	0.432	0.00805101
E2f4	3.42858e-08	0.340385	0.586	0.488	0.00072799
Agpat5	1.24763e-06	0.340602	0.673	0.566	0.0264909
Nr2c2ap	5.59158e-08	0.340845	0.441	0.311	0.00118726
Ywhaz	2.18492e-07	0.341186	0.932	0.984	0.00463924
Acadvl	9.7129e-07	0.341396	0.759	0.703	0.0206234
Rnaset2b	1.1332e-07	0.341419	0.523	0.384	0.00240611
Pqbp1	2.00244e-07	0.341542	0.664	0.557	0.00425177
Vbp1	4.0862e-07	0.341817	0.782	0.698	0.00867622
Cnpy4	2.64406e-07	0.34222	0.723	0.583	0.00561414
Tpd52l2	1.00703e-06	0.342374	0.836	0.795	0.0213823
Nid1	2.25535e-06	0.34282	0.927	0.987	0.0478879
Cisd3	2.60551e-08	0.342982	0.505	0.377	0.000553228
Cfap36	1.67894e-06	0.343059	0.668	0.577	0.035649
Cyb5r1	4.42067e-07	0.343695	0.55	0.407	0.0093864
Nup85	3.54554e-09	0.34383	0.4	0.269	7.52824e-05
Emc2	4.20953e-07	0.343926	0.741	0.633	0.0089381
Slc39a1	4.238e-07	0.344254	0.905	0.934	0.00899855
Mrpl43	2.05671e-06	0.344375	0.755	0.762	0.0436701
Mta2	2.59949e-08	0.344713	0.577	0.495	0.000551949
Dnajc24	1.41092e-07	0.344803	0.491	0.344	0.00299581
Utp14a	1.04044e-07	0.344853	0.664	0.533	0.00220916
Nubp2	1.65966e-08	0.344912	0.482	0.331	0.000352395
Pabpn1	4.1974e-07	0.34514	0.927	0.936	0.00891233
Bag2	2.63708e-07	0.34564	0.377	0.262	0.00559931
Mrps23	1.68418e-06	0.346029	0.655	0.543	0.0357602
Etfrf1	4.27124e-10	0.346105	0.477	0.302	9.06912e-06
Ganab	5.26907e-07	0.346154	0.855	0.823	0.0111878
Mocs2	8.49889e-07	0.346194	0.809	0.749	0.0180457
Sf3b2	1.22726e-06	0.346347	0.877	0.922	0.0260583
Gmfb	8.95277e-07	0.346454	0.777	0.724	0.0190094
Ergic1	1.66215e-06	0.346905	0.795	0.77	0.0352925
Znhit6	8.66406e-08	0.347168	0.445	0.316	0.00183964
Abcf1	7.52549e-07	0.347698	0.864	0.837	0.0159789
Rnaset2a	5.54398e-08	0.347716	0.555	0.404	0.00117715
Cmtm6	1.4518e-08	0.347824	0.614	0.463	0.000308261
Ehbp1l1	1.28892e-06	0.348021	0.536	0.429	0.0273677
Bphl	1.16553e-07	0.348146	0.468	0.351	0.00247478
Gpam	6.66996e-08	0.348183	0.355	0.215	0.00141623
2210016L21Rik	1.81726e-07	0.348226	0.641	0.546	0.00385859
Tmem30a	2.34758e-07	0.34849	0.882	0.862	0.00498462
Purb	1.74711e-07	0.348585	0.914	0.918	0.00370964
Arf6	2.75645e-07	0.348704	0.832	0.768	0.00585277
Dazap1	1.38408e-06	0.348716	0.886	0.885	0.0293882
Aamp	9.32311e-07	0.348742	0.868	0.874	0.0197958
Lsm2	8.16156e-07	0.349662	0.705	0.608	0.0173294
Gatd3a	1.46032e-09	0.350075	0.527	0.356	3.10071e-05
Idh3g	7.16065e-07	0.350269	0.85	0.776	0.0152042
Fam3c	6.01827e-07	0.350304	0.855	0.765	0.0127786
Ndufs1	1.92165e-07	0.350326	0.691	0.595	0.00408024
Gnptg	4.7452e-10	0.350501	0.482	0.341	1.00755e-05
Ubqln1	1.09006e-07	0.350538	0.805	0.699	0.00231452
Sarnp	2.22048e-06	0.350766	0.855	0.892	0.0471475
Chchd6	7.59868e-09	0.351257	0.514	0.349	0.000161343
Use1	1.94591e-07	0.351352	0.9	0.897	0.00413176
Maob	7.87015e-09	0.351572	0.286	0.131	0.000167107
A430005L14Rik	2.32309e-09	0.351675	0.477	0.328	4.93262e-05
Slc5a3	8.01607e-07	0.351732	0.45	0.341	0.0170205
Gm45716	4.6906e-09	0.352484	0.227	0.114	9.95954e-05
Ccnq	1.01215e-08	0.352518	0.432	0.307	0.00021491
Mtg1	9.27682e-14	0.352719	0.327	0.139	1.96975e-09
Ercc1	1.96741e-06	0.352901	0.673	0.605	0.0417739
Cldn15	3.53008e-07	0.353337	0.282	0.129	0.00749542
Rnps1	3.86636e-08	0.353551	0.855	0.836	0.000820943
Ldhb	9.83112e-07	0.35382	0.455	0.327	0.0208744
Ccnh	5.63505e-07	0.354037	0.618	0.542	0.0119649
Bcas2	1.6166e-06	0.354049	0.809	0.794	0.0343253
Dph5	1.12238e-06	0.354109	0.482	0.336	0.0238315
Nol12	6.52981e-08	0.354376	0.786	0.724	0.00138648
Atp6ap1	4.881e-07	0.35525	0.845	0.821	0.0103638
Cdc42se1	6.59699e-07	0.355468	0.773	0.671	0.0140074
Mars	1.48656e-06	0.355672	0.564	0.448	0.0315642
Sdhaf4	7.81244e-07	0.356209	0.636	0.554	0.0165881
Erg28	1.78469e-06	0.356315	0.659	0.596	0.0378944
Ptbp1	5.61321e-07	0.357146	0.909	0.941	0.0119185
Cenpb	1.16405e-06	0.357475	0.891	0.881	0.0247162
Snrnp200	1.11986e-08	0.357671	0.668	0.595	0.000237779
Pycrl	3.38805e-08	0.357729	0.464	0.308	0.000719384
2010204K13Rik	3.34243e-08	0.357806	0.373	0.245	0.000709697
Slc35a1	5.10996e-08	0.358287	0.605	0.472	0.001085
Gm21887	3.08506e-09	0.358831	0.391	0.231	6.55051e-05
Cd164	3.88004e-08	0.359386	0.873	0.876	0.000823848
Cuedc2	3.26913e-07	0.359693	0.8	0.772	0.00694134
Bicd2	1.22441e-07	0.360169	0.695	0.573	0.00259978
Vcp	6.58204e-07	0.360549	0.955	0.985	0.0139756
H2afx	3.10768e-07	0.360938	0.623	0.563	0.00659853
Egln3	1.52216e-06	0.360952	0.15	0.061	0.0323199
Nop53	3.43131e-08	0.361346	0.918	0.895	0.00072857
Immt	8.37018e-07	0.362164	0.805	0.807	0.0177724
Clpp	1.1166e-06	0.362198	0.714	0.652	0.0237088
Dis3	1.41278e-08	0.362704	0.486	0.344	0.000299976
Nr1h3	4.15184e-14	0.362919	0.314	0.129	8.8156e-10
Psmd10	1.36214e-07	0.36307	0.532	0.461	0.00289224
Prpf8	1.56787e-07	0.363273	0.795	0.735	0.00332905
Cab39l	3.11352e-07	0.363673	0.586	0.5	0.00661093
Pdcd6	2.87816e-07	0.363762	0.855	0.92	0.00611119
Mme	4.35381e-13	0.363882	0.191	0.066	9.24444e-09
Slc25a39	2.64822e-07	0.364052	0.818	0.763	0.00562297
Gnl2	1.6505e-07	0.364181	0.695	0.615	0.0035045
Il10rb	3.16623e-07	0.364276	0.627	0.552	0.00672286
Thoc5	1.0686e-09	0.364538	0.459	0.301	2.26896e-05
Eif5b	1.66198e-07	0.364747	0.918	0.954	0.00352888
Timm9	4.00551e-07	0.364792	0.595	0.521	0.0085049
Ik	2.76592e-07	0.364934	0.791	0.718	0.00587288
Ndufaf3	4.81874e-10	0.364965	0.532	0.351	1.02316e-05
Polr2m	1.40971e-07	0.365073	0.841	0.827	0.00299323
Eif4a3	4.61715e-07	0.365266	0.832	0.808	0.00980359
Stk16	3.20287e-08	0.365267	0.759	0.674	0.000680065
Eif3j1	3.08412e-07	0.365286	0.886	0.904	0.00654851
Mrpl11	1.27402e-06	0.365609	0.723	0.643	0.0270513
Mrpl55	9.3549e-07	0.365662	0.605	0.507	0.0198633
Mitd1	5.86111e-07	0.365665	0.409	0.24	0.0124449
Ptcd2	8.51902e-11	0.365741	0.482	0.304	1.80884e-06
Exoc3l4	2.766e-08	0.365786	0.432	0.289	0.000587306
Mrpl50	4.6492e-09	0.365938	0.709	0.582	9.87165e-05
Mrpl16	1.93793e-07	0.366336	0.605	0.488	0.0041148
Gtf3c6	1.5258e-06	0.366368	0.65	0.577	0.0323973
Mrpl32	4.03598e-07	0.36659	0.791	0.745	0.00856959
Dag1	9.71728e-08	0.366627	0.864	0.874	0.00206327
Usp1	2.19491e-06	0.367136	0.568	0.451	0.0466044
2310009B15Rik	2.86709e-07	0.367351	0.695	0.621	0.00608768
Bag5	9.17261e-08	0.367508	0.768	0.655	0.00194762
Cetn3	1.28317e-06	0.367859	0.855	0.834	0.0272454
Mrpl22	2.97618e-07	0.367881	0.555	0.432	0.00631932
Hfe	1.0138e-09	0.368047	0.391	0.28	2.1526e-05
Aarsd1	3.18237e-07	0.368186	0.732	0.643	0.00675712
Hdhd2	2.5828e-08	0.368411	0.491	0.343	0.000548406
Cox7a1	2.14347e-08	0.368578	0.118	0.047	0.000455124
Asah1	9.04584e-07	0.368702	0.818	0.829	0.019207
Mgarp	2.82083e-08	0.368768	0.177	0.097	0.000598946
Bop1	2.53158e-08	0.368853	0.591	0.464	0.00053753
Timm17b	2.04617e-06	0.369098	0.782	0.748	0.0434462
Sdc3	3.32207e-07	0.369165	0.859	0.889	0.00705374
Tsnax	8.89064e-09	0.369228	0.727	0.557	0.000188775
Mrpl58	3.72757e-07	0.369254	0.777	0.698	0.00791474
Gpsm3	1.19351e-06	0.369276	0.6	0.53	0.0253418
Ppil1	4.93008e-08	0.369349	0.405	0.27	0.0010468
Gtf2f1	6.23747e-08	0.369368	0.695	0.593	0.0013244
Uqcrc2	5.31508e-07	0.369559	0.877	0.871	0.0112855
Arf1	1.76606e-06	0.369589	0.932	0.98	0.0374987
Iscu	3.72552e-07	0.369727	0.832	0.78	0.00791039
Wdr77	3.2852e-08	0.369925	0.632	0.507	0.000697546
Cs	1.5127e-07	0.370266	0.855	0.808	0.00321191
Mrpl13	1.87743e-06	0.370431	0.832	0.808	0.0398634
Pop5	2.4186e-07	0.370799	0.568	0.437	0.00513542
Rars	5.63186e-07	0.371204	0.777	0.749	0.0119581
Gtf2h5	1.01077e-06	0.371526	0.918	0.924	0.0214617
Xbp1	3.17221e-07	0.371529	0.918	0.937	0.00673556
Rtcb	3.2488e-08	0.37177	0.855	0.797	0.000689818
Gpr153	1.39689e-06	0.37177	0.841	0.897	0.0296601
Nmt1	2.09544e-07	0.37224	0.868	0.829	0.00444925
Rad23a	2.40404e-07	0.372399	0.777	0.697	0.00510449
Nabp2	1.12955e-07	0.37248	0.75	0.653	0.00239837
Etfa	1.20011e-07	0.373075	0.877	0.834	0.00254818
Trip6	2.3511e-07	0.373131	0.764	0.653	0.0049921
Psmb7	1.25215e-06	0.373493	0.864	0.886	0.026587
Akr1e1	1.17702e-11	0.374189	0.482	0.31	2.49918e-07
2610507B11Rik	1.69598e-08	0.374569	0.755	0.671	0.000360107
Ipo4	2.09825e-07	0.374896	0.736	0.73	0.00445522
Rab6a	6.62031e-08	0.375187	0.859	0.915	0.00140569
Elovl1	3.88509e-07	0.375234	0.841	0.829	0.00824921
Ubqln2	9.14427e-09	0.375384	0.659	0.507	0.00019416
Tmem184c	3.74314e-09	0.375709	0.609	0.452	7.94782e-05
Tspan3	1.73482e-07	0.375836	0.891	0.927	0.00368355
Tufm	6.13023e-08	0.375951	0.668	0.556	0.00130163
Parl	8.94114e-07	0.375952	0.723	0.624	0.0189847
Atp5d	2.19116e-06	0.376158	0.932	0.943	0.0465249
Eif3h	2.09922e-06	0.376224	0.923	0.961	0.0445727
Aip	1.71479e-08	0.37623	0.75	0.624	0.000364102
Lix1l	3.37169e-07	0.376506	0.773	0.826	0.0071591
Ppp1r7	6.99935e-08	0.377266	0.6	0.484	0.00148617
N6amt1	2.01335e-08	0.377351	0.595	0.491	0.000427495
Cyp27a1	9.71271e-12	0.377472	0.345	0.138	2.0623e-07
Minpp1	7.10954e-08	0.377994	0.636	0.511	0.00150957
Akt1	9.35643e-07	0.378065	0.882	0.886	0.0198665
Polr1c	1.00179e-08	0.378235	0.745	0.66	0.00021271
Rab5c	3.40194e-08	0.378527	0.836	0.835	0.000722335
Chtop	2.69965e-09	0.378616	0.836	0.794	5.73217e-05
Ccdc124	2.24377e-06	0.378699	0.805	0.763	0.047642
Bmyc	1.29545e-06	0.3788	0.505	0.384	0.0275064
Suclg1	2.12945e-06	0.378879	0.814	0.801	0.0452147
Tubg1	2.72425e-08	0.379526	0.35	0.208	0.00057844
Hmbs	4.78115e-08	0.379692	0.532	0.438	0.00101518
Ino80c	1.89319e-08	0.379875	0.577	0.405	0.000401981
Mrpl53	1.25401e-06	0.379898	0.741	0.751	0.0266264
Nop2	7.76636e-09	0.380085	0.541	0.416	0.000164903
Ism1	1.24908e-06	0.380085	0.232	0.137	0.0265217
Ppp1cc	4.81345e-08	0.380433	0.877	0.879	0.00102204
Cndp2	5.41675e-07	0.380934	0.727	0.677	0.0115014
Npr1	1.01889e-16	0.381261	0.245	0.052	2.16341e-12
Emc8	1.03674e-07	0.381379	0.718	0.664	0.00220131
Noc3l	3.58347e-10	0.38142	0.468	0.283	7.60877e-06
Hand2os1	1.48391e-09	0.382133	0.209	0.108	3.15079e-05
Psenen	5.39553e-08	0.382169	0.9	0.869	0.00114563
Ndufv1	6.8172e-08	0.382453	0.841	0.79	0.0014475
Eif2b1	6.33388e-09	0.382473	0.55	0.37	0.000134487
Olfm1	1.97046e-08	0.38272	0.627	0.491	0.000418387
Rgs19	2.1236e-07	0.382868	0.559	0.464	0.00450904
Tmed1	1.14613e-06	0.382903	0.782	0.768	0.0243358
Cdc34	1.14326e-07	0.382916	0.727	0.665	0.00242749
Fasn	3.63673e-08	0.382977	0.659	0.536	0.000772186
Ppp5c	9.44189e-09	0.383437	0.586	0.528	0.00020048
Hdac1	4.81969e-07	0.383768	0.755	0.707	0.0102336
Dnaja1	1.47025e-06	0.383908	0.932	0.964	0.0312177
Gnl3	2.48734e-07	0.384073	0.918	0.947	0.00528137
Pole4	4.9272e-07	0.384154	0.823	0.776	0.0104619
Ss18l2	6.58945e-08	0.384292	0.65	0.485	0.00139914
Idh3b	2.46021e-08	0.38457	0.745	0.686	0.000522376
Mapre1	9.21902e-09	0.384599	0.923	0.938	0.000195747
Fis1	1.4135e-07	0.38501	0.891	0.918	0.00300128
Dcun1d5	3.75336e-07	0.385451	0.877	0.893	0.0079695
Mdh1	2.29764e-06	0.385639	0.845	0.842	0.0487859
Jkamp	7.85564e-08	0.385676	0.768	0.738	0.00166799
Tspan12	2.6038e-08	0.386125	0.423	0.27	0.000552865
Selenon	4.59927e-09	0.386666	0.868	0.828	9.76562e-05
Canx	6.53577e-08	0.386752	0.936	0.982	0.00138774
Lsm12	1.91423e-07	0.387193	0.886	0.898	0.00406448
Ndufb11	2.12779e-06	0.387592	0.895	0.924	0.0451794
Timm50	1.18801e-07	0.38772	0.714	0.629	0.00252249
Mrpl40	5.45274e-08	0.387805	0.645	0.536	0.00115778
Ndufa9	1.06664e-07	0.387955	0.718	0.676	0.0022648
Atoh8	1.56334e-07	0.388026	0.264	0.163	0.00331944
Snf8	1.88102e-07	0.38836	0.845	0.835	0.00399398
Aco2	1.36284e-08	0.388521	0.818	0.802	0.000289372
Esf1	1.15543e-07	0.388608	0.827	0.786	0.00245333
Gmpr2	1.09579e-09	0.388723	0.473	0.343	2.3267e-05
Erp44	1.17011e-07	0.388847	0.886	0.922	0.00248449
Gm49708	7.31508e-08	0.388894	0.282	0.107	0.00155321
Slc35a4	7.9102e-11	0.388975	0.582	0.454	1.67957e-06
Btc	8.21274e-10	0.388992	0.155	0.056	1.74381e-05
Arpc5	5.70555e-08	0.389327	0.873	0.922	0.00121146
Tmem185a	7.69392e-12	0.389472	0.505	0.32	1.63365e-07
Pmpcb	3.75245e-07	0.389836	0.741	0.655	0.00796758
Qars	7.57834e-09	0.3899	0.723	0.681	0.000160911
Timm21	9.43871e-11	0.389971	0.573	0.395	2.00412e-06
Zmat5	3.10246e-09	0.390198	0.605	0.447	6.58745e-05
Mrpl30	5.12571e-07	0.39028	0.873	0.881	0.0108834
Sdhd	3.54363e-07	0.390347	0.8	0.76	0.00752418
Arpc3	2.01541e-06	0.390401	0.914	0.956	0.0427932
Adsl	3.31983e-10	0.390428	0.573	0.356	7.04899e-06
Rbck1	2.63136e-09	0.390708	0.736	0.621	5.58716e-05
Tor1b	4.0439e-09	0.390753	0.709	0.655	8.58641e-05
Pus1	1.45197e-10	0.390753	0.568	0.399	3.08297e-06
Fbxo6	4.26546e-10	0.390895	0.436	0.296	9.05686e-06
Prpf31	7.04231e-09	0.391054	0.568	0.413	0.000149529
Tob2	2.85104e-07	0.391367	0.777	0.744	0.00605362
Ccnl1	6.12335e-08	0.391828	0.905	0.96	0.00130017
Mydgf	2.24179e-06	0.391963	0.9	0.95	0.0475999
Dynlt1f	2.83406e-08	0.391988	0.577	0.443	0.000601755
Rap2b	4.6845e-07	0.392084	0.645	0.536	0.0099466
Rab14	6.45362e-09	0.39213	0.909	0.93	0.00013703
Asb4	3.59733e-09	0.392145	0.168	0.046	7.63821e-05
Bud31	1.95266e-08	0.392441	0.836	0.84	0.000414609
Eif4h	5.42579e-08	0.392529	0.895	0.938	0.00115206
Acaa1a	4.06904e-08	0.392536	0.805	0.778	0.000863978
Asnsd1	1.12257e-07	0.392547	0.723	0.68	0.00238356
Ndufs8	3.97157e-07	0.392722	0.795	0.749	0.00843284
Cuta	1.04818e-07	0.392955	0.814	0.804	0.00222561
Myadm	6.84378e-07	0.393084	0.927	0.972	0.0145314
Psmc4	2.12282e-06	0.393453	0.859	0.817	0.0450739
Ndufs6	3.76208e-07	0.393673	0.855	0.882	0.00798802
Tsr1	3.23744e-10	0.393751	0.605	0.439	6.87406e-06
Ubl5	2.31398e-06	0.394091	0.905	0.941	0.0491327
Zfp622	4.96904e-08	0.394296	0.727	0.615	0.00105508
Sf3b4	2.31758e-08	0.394676	0.736	0.617	0.000492092
Tgoln1	6.92712e-09	0.394684	0.882	0.863	0.000147084
Ltv1	3.32428e-08	0.395421	0.632	0.536	0.000705844
Skp1a	1.0485e-08	0.395683	0.877	0.843	0.000222628
Zbtb16	2.54669e-12	0.395866	0.3	0.075	5.40738e-08
Dld	3.69206e-08	0.395869	0.795	0.737	0.000783935
Sdha	3.88712e-08	0.396118	0.814	0.813	0.000825353
Tsc22d4	5.34467e-08	0.396387	0.714	0.672	0.00113483
Smco4	1.27396e-06	0.39642	0.623	0.588	0.0270499
Rab1b	3.00252e-08	0.39666	0.768	0.744	0.000637526
Tsfm	5.52795e-09	0.396774	0.568	0.42	0.000117375
Bnip3l	1.27488e-07	0.39691	0.845	0.916	0.00270695
Tmem9b	1.47141e-09	0.397087	0.755	0.691	3.12425e-05
Tmco1	2.66589e-07	0.397601	0.9	0.885	0.00566047
Cdc37	2.06757e-08	0.398643	0.914	0.922	0.000439006
Naaa	1.29284e-09	0.398681	0.614	0.43	2.74509e-05
Tm9sf1	1.03188e-09	0.399007	0.841	0.8	2.19099e-05
Gde1	1.42181e-07	0.399074	0.791	0.737	0.00301893
Krcc1	2.35162e-07	0.399727	0.809	0.786	0.00499319
Sft2d1	6.49745e-10	0.400339	0.677	0.539	1.3796e-05
Ndufa7	1.82377e-06	0.400566	0.909	0.933	0.0387242
Ndufc1	1.98828e-06	0.400605	0.909	0.912	0.0422171
Eif3c	1.38706e-07	0.400648	0.914	0.95	0.00294515
Rex1bd	5.83316e-07	0.400959	0.832	0.864	0.0123856
U2af1	5.07081e-08	0.401061	0.886	0.918	0.00107668
Rpia	1.79434e-13	0.401175	0.468	0.239	3.80992e-09
Atp5h	8.30528e-07	0.401224	0.955	0.956	0.0176346
Tomm70a	1.42548e-08	0.401232	0.759	0.745	0.000302673
Rrp1	2.50839e-09	0.401241	0.877	0.843	5.32607e-05
Tgif1	1.69054e-06	0.401335	0.818	0.8	0.0358952
Plpbp	4.86593e-10	0.401501	0.709	0.621	1.03318e-05
Klhdc4	6.8919e-10	0.402144	0.564	0.393	1.46336e-05
Bnip2	1.5295e-08	0.402328	0.873	0.893	0.000324759
Mrpl14	1.53672e-06	0.402596	0.709	0.712	0.0326291
Mrpl42	1.03849e-06	0.402709	0.818	0.815	0.0220503
Rnf187	2.34466e-07	0.402926	0.841	0.833	0.00497841
Ndufa11	3.27076e-07	0.403085	0.886	0.897	0.0069448
Rpsa	4.07033e-07	0.403207	1	1	0.00864254
G3bp2	1.61182e-07	0.40327	0.741	0.713	0.00342239
Gabarapl2	1.39522e-07	0.403345	0.855	0.829	0.00296248
Isg20	6.12037e-07	0.403441	0.577	0.5	0.0129954
Pfkp	4.92159e-07	0.40345	0.75	0.648	0.01045
Fetub	8.66248e-20	0.40376	0.223	0.041	1.8393e-15
Nucb2	1.92688e-07	0.403815	0.891	0.89	0.00409134
9130401M01Rik	1.13977e-07	0.403862	0.686	0.629	0.00242008
Snapc5	1.55585e-08	0.40395	0.745	0.621	0.000330354
Nudt19	7.80062e-09	0.403957	0.627	0.52	0.000165631
Ebp	6.15607e-08	0.404073	0.745	0.72	0.00130712
Ndufaf2	8.36979e-08	0.404399	0.759	0.683	0.00177716
Naa50	2.7117e-07	0.404694	0.85	0.863	0.00575776
Tmem109	1.19944e-07	0.40481	0.773	0.692	0.00254676
Hibadh	2.91352e-09	0.404892	0.759	0.706	6.18628e-05
Sars	2.11398e-07	0.404957	0.855	0.813	0.00448862
Impad1	2.48381e-09	0.405058	0.814	0.755	5.27387e-05
Sbno2	1.28201e-06	0.405064	0.705	0.684	0.0272208
AC149090.1	6.21126e-11	0.405107	0.473	0.252	1.31884e-06
Mthfd1	3.89438e-10	0.405233	0.391	0.211	8.26893e-06
H2afy	3.73987e-08	0.405312	0.886	0.912	0.000794086
Uba2	2.87027e-08	0.40544	0.782	0.754	0.000609445
Commd4	3.15292e-09	0.40547	0.709	0.658	6.6946e-05
Rabggtb	1.2166e-08	0.405484	0.755	0.684	0.00025832
Mrpl3	4.54871e-09	0.405775	0.668	0.578	9.65828e-05
Tspan31	1.07151e-08	0.405779	0.891	0.87	0.000227514
Ndufa10	2.3998e-08	0.405821	0.873	0.861	0.000509549
Timm23	1.19201e-06	0.406535	0.905	0.924	0.02531
Calm3	1.69866e-07	0.406634	0.882	0.938	0.00360676
Vps28	7.31424e-08	0.407157	0.818	0.747	0.00155303
Snrnp27	1.67217e-07	0.407175	0.795	0.722	0.00355052
Snhg8	5.41737e-08	0.407185	0.905	0.924	0.00115027
Rtl8a	1.10033e-10	0.40737	0.645	0.464	2.33632e-06
Srsf5	5.6386e-10	0.407734	0.932	0.971	1.19724e-05
Derl2	2.54279e-08	0.407758	0.809	0.752	0.00053991
Psmg4	1.44902e-08	0.407768	0.768	0.696	0.00030767
Rpn1	5.9437e-08	0.407778	0.941	0.985	0.00126203
Ptrh2	9.46748e-11	0.40788	0.536	0.367	2.01023e-06
Prorsd1	8.23621e-07	0.408694	0.618	0.526	0.017488
Apex1	5.62635e-08	0.408971	0.695	0.629	0.00119464
Trappc4	7.97059e-07	0.408975	0.823	0.793	0.0169239
Sgcb	2.59036e-09	0.409123	0.85	0.785	5.5001e-05
Vdac1	1.12563e-06	0.409426	0.9	0.916	0.0239005
Vma21	8.24595e-08	0.409543	0.814	0.785	0.00175086
Cr1l	2.24625e-09	0.409855	0.795	0.796	4.76945e-05
Pcbp4	1.11575e-07	0.409859	0.736	0.655	0.00236906
1110038F14Rik	1.95578e-09	0.41007	0.655	0.562	4.15271e-05
Clns1a	2.11515e-08	0.410136	0.764	0.657	0.00044911
Ube2d3	3.71106e-10	0.410139	0.964	0.981	7.8797e-06
Pfdn4	2.75209e-08	0.410738	0.755	0.679	0.000584352
Sik1	1.66772e-06	0.411163	0.773	0.713	0.0354107
Spty2d1	6.64193e-08	0.41118	0.8	0.758	0.00141028
Sgta	1.03001e-07	0.411298	0.777	0.766	0.00218703
Mea1	2.02996e-09	0.41147	0.732	0.653	4.31022e-05
Polr2k	3.6137e-08	0.411962	0.814	0.792	0.000767297
Socs1	8.81372e-09	0.411987	0.368	0.227	0.000187142
2610001J05Rik	5.0755e-09	0.412153	0.8	0.703	0.000107768
Tmem160	3.51907e-08	0.412184	0.868	0.844	0.000747203
Wdr46	2.32422e-11	0.412222	0.509	0.349	4.93502e-07
Tbrg1	1.08363e-06	0.412226	0.932	0.956	0.0230086
Mtfr1l	1.02788e-08	0.412797	0.755	0.673	0.000218249
Phf5a	4.72706e-08	0.412802	0.809	0.767	0.0010037
Cd3eap	2.26393e-08	0.413111	0.532	0.362	0.0004807
Emd	2.47846e-07	0.413375	0.8	0.762	0.00526252
Preb	8.13218e-11	0.413439	0.682	0.544	1.72671e-06
Snhg4	1.98575e-06	0.413764	0.705	0.607	0.0421634
Atp5b	1.99369e-06	0.413812	0.955	0.978	0.042332
Lsm8	5.31255e-08	0.413939	0.7	0.653	0.00112801
Cox14	3.66636e-08	0.414003	0.836	0.79	0.000778478
Txndc17	1.21587e-06	0.414039	0.909	0.917	0.0258165
Siah2	1.11106e-07	0.414171	0.659	0.573	0.00235911
Vdac3	1.10021e-06	0.414588	0.882	0.883	0.0233608
Tmed10	1.1123e-07	0.414607	0.936	0.98	0.00236175
Churc1	1.48112e-08	0.414806	0.786	0.74	0.000314485
Gnb2	2.06295e-07	0.414869	0.909	0.968	0.00438026
Ptpmt1	5.30042e-08	0.415349	0.755	0.707	0.00112544
Ppp4c	4.47938e-10	0.415471	0.755	0.7	9.51106e-06
Il6st	2.13701e-07	0.415497	0.932	0.968	0.00453751
Samm50	5.69835e-09	0.415628	0.809	0.778	0.000120993
Mrps18a	1.06101e-09	0.415713	0.8	0.724	2.25285e-05
Psmd2	9.01192e-08	0.415723	0.882	0.903	0.0019135
Fam111a	6.71259e-09	0.415949	0.432	0.28	0.000142529
Atad3a	8.98072e-10	0.41599	0.614	0.47	1.90688e-05
Tmed7	1.09782e-09	0.416732	0.886	0.882	2.33101e-05
Med21	1.4019e-07	0.416936	0.823	0.705	0.00297666
Tmem14c	6.48013e-07	0.417254	0.886	0.891	0.0137593
Gtf2a2	5.7147e-09	0.417323	0.827	0.823	0.00012134
Chmp4b	8.23425e-09	0.417414	0.927	0.957	0.000174838
Ssb	2.05029e-08	0.418182	0.9	0.934	0.000435339
Bud23	1.47866e-08	0.418185	0.595	0.494	0.000313964
Rwdd1	3.79783e-07	0.418313	0.886	0.895	0.00806393
Ap2m1	4.88642e-08	0.418617	0.927	0.94	0.00103753
Mlf2	1.40981e-07	0.418762	0.886	0.898	0.00299345
Actn4	8.50466e-09	0.418985	0.918	0.946	0.00018058
Mrps6	6.61846e-09	0.419025	0.686	0.583	0.00014053
Snrpe	4.15046e-07	0.419285	0.945	0.943	0.00881267
Cers2	6.16476e-09	0.419376	0.859	0.817	0.000130896
Rpl9-ps6	1.10886e-11	0.419649	0.659	0.507	2.35444e-07
1810037I17Rik	1.335e-07	0.419705	0.918	0.897	0.0028346
Polr1d	1.89107e-07	0.419881	0.927	0.938	0.00401531
Dnajc19	3.81375e-08	0.419887	0.814	0.793	0.000809774
Chst2	1.36692e-08	0.42058	0.545	0.418	0.000290238
Tkt	1.26155e-08	0.42102	0.882	0.909	0.000267864
Chchd1	4.38543e-07	0.421045	0.85	0.84	0.00931158
Tm2d3	6.49291e-11	0.421154	0.6	0.488	1.37864e-06
Fmc1	1.52367e-08	0.421155	0.755	0.632	0.000323522
Atg101	2.23015e-08	0.421347	0.727	0.608	0.000473528
Pdcd11	1.11383e-10	0.421625	0.682	0.553	2.36499e-06
Diablo	1.20867e-10	0.421655	0.609	0.46	2.56638e-06
Drap1	4.17297e-08	0.422161	0.909	0.918	0.000886047
Metap2	1.45349e-08	0.422302	0.923	0.945	0.00030862
Serp1	1.5586e-06	0.42257	0.927	0.952	0.0330937
Bckdk	4.22823e-11	0.422594	0.673	0.459	8.9778e-07
Exosc4	6.63024e-08	0.423067	0.609	0.478	0.0014078
Eif2s2	9.47066e-08	0.423129	0.95	0.978	0.0020109
Eif3m	6.38218e-08	0.423475	0.891	0.9	0.00135513
Fbln2	1.11157e-07	0.423697	0.982	1	0.00236019
Mrps18c	4.44684e-08	0.423726	0.745	0.674	0.000944197
Nudt2	4.3663e-10	0.423903	0.536	0.402	9.27096e-06
Dynlrb1	3.3114e-07	0.423934	0.905	0.924	0.00703109
Grwd1	1.29694e-11	0.424111	0.482	0.304	2.7538e-07
B230118H07Rik	9.89931e-11	0.42469	0.577	0.393	2.10192e-06
Coq2	6.61174e-10	0.424766	0.623	0.54	1.40387e-05
Rrp1b	5.28927e-08	0.424823	0.541	0.423	0.00112307
Pam16	1.675e-07	0.424984	0.686	0.648	0.00355652
Snrpa	3.0683e-08	0.425561	0.791	0.767	0.000651493
Bsg	2.28105e-07	0.425772	0.968	0.991	0.00484336
Aimp1	7.82916e-08	0.425911	0.886	0.885	0.00166236
Psmd13	3.56311e-08	0.426218	0.85	0.851	0.000756556
Trappc6a	1.80661e-09	0.426421	0.614	0.489	3.83598e-05
Hsp90ab1	3.78421e-08	0.426752	1	0.998	0.000803502
Magohb	5.5323e-10	0.427372	0.586	0.482	1.17467e-05
Psme1	3.07924e-08	0.427594	0.841	0.849	0.000653814
Gjb3	1.59086e-07	0.427846	0.2	0.095	0.00337788
Mapk3	3.39556e-09	0.428016	0.714	0.678	7.2098e-05
Ncoa4	4.83681e-10	0.428132	0.627	0.459	1.027e-05
Lamb2	1.24277e-07	0.428132	0.85	0.881	0.00263877
Nol7	2.77564e-08	0.428187	0.836	0.819	0.000589351
Cpox	2.5363e-09	0.428354	0.509	0.371	5.38533e-05
Zbtb4	4.21027e-10	0.428393	0.55	0.398	8.93967e-06
Mrps15	2.94055e-08	0.428838	0.768	0.754	0.000624366
Sar1b	6.73607e-09	0.429187	0.827	0.813	0.000143027
Plpp1	4.9823e-07	0.429331	0.891	0.924	0.0105789
Tmem238	3.95282e-10	0.429486	0.464	0.288	8.39302e-06
Ccdc86	1.16273e-11	0.429544	0.6	0.458	2.46882e-07
Kmt5a	3.29081e-08	0.429574	0.777	0.78	0.000698739
Jagn1	1.8644e-08	0.429997	0.745	0.601	0.000395867
2310011J03Rik	5.07421e-11	0.430117	0.623	0.454	1.07741e-06
Atp5g2	4.74795e-07	0.430301	0.927	0.957	0.0100813
Nol11	2.30991e-11	0.43035	0.586	0.47	4.90464e-07
Ssu72	3.59627e-07	0.430678	0.823	0.833	0.00763596
Calm1	1.24639e-06	0.430845	0.964	0.986	0.0264645
Fdx1	2.07264e-06	0.431009	0.695	0.616	0.0440083
Psma6	2.39173e-07	0.431084	0.864	0.882	0.00507837
Ssr1	3.84453e-09	0.431198	0.941	0.971	8.16308e-05
Rps14	1.97801e-07	0.431666	0.991	0.999	0.0041999
Rassf1	2.77467e-07	0.432147	0.773	0.722	0.00589145
Brix1	1.53292e-09	0.432244	0.764	0.728	3.25486e-05
Psmd6	2.63296e-07	0.432281	0.85	0.819	0.00559057
Kti12	4.08753e-11	0.432409	0.586	0.429	8.67904e-07
Epdr1	6.31366e-11	0.432599	0.705	0.498	1.34058e-06
G6pdx	1.31996e-12	0.432635	0.582	0.396	2.80267e-08
Trnau1ap	2.41994e-09	0.432652	0.627	0.563	5.13826e-05
Ywhae	1.04586e-08	0.432819	0.95	0.981	0.000222067
Psmc1	2.41561e-08	0.432928	0.836	0.788	0.000512907
Dhrs1	7.09299e-10	0.43347	0.673	0.578	1.50605e-05
Cavin1	3.0794e-09	0.433623	0.927	0.951	6.5385e-05
Bace2	8.56672e-07	0.433728	0.509	0.459	0.0181897
Ndufa3	1.06077e-08	0.433874	0.936	0.929	0.000225234
Mlx	4.3788e-13	0.434377	0.468	0.3	9.29751e-09
Axl	3.83117e-09	0.434449	0.95	0.956	8.13472e-05
Bax	1.0535e-06	0.434612	0.868	0.872	0.022369
Cltb	1.02694e-07	0.434644	0.868	0.815	0.00218049
Polr3k	1.93065e-09	0.435292	0.577	0.41	4.09935e-05
Ginm1	5.54078e-10	0.435438	0.818	0.704	1.17647e-05
Chmp1a	5.41003e-10	0.435444	0.773	0.657	1.14871e-05
Cxxc5	4.7328e-09	0.435478	0.573	0.427	0.000100491
Galnt2	1.14176e-08	0.435538	0.877	0.807	0.00024243
Tmem126a	1.50085e-07	0.43565	0.764	0.742	0.00318676
Snx18	6.54718e-08	0.435704	0.805	0.799	0.00139016
Spry2	2.04916e-06	0.435834	0.8	0.714	0.0435098
Stx4a	1.46866e-11	0.436055	0.8	0.775	3.1184e-07
Slc1a5	1.24737e-09	0.436134	0.85	0.844	2.64853e-05
Mrps36	6.1787e-08	0.436202	0.759	0.703	0.00131192
Cd320	6.83934e-09	0.436379	0.682	0.622	0.00014522
Ppm1g	1.42985e-08	0.436621	0.723	0.637	0.000303601
Lysmd2	1.08711e-08	0.437175	0.595	0.456	0.000230827
Gtpbp4	1.25724e-09	0.437326	0.786	0.827	2.66951e-05
Fkbp2	1.2463e-07	0.437432	0.891	0.896	0.00264627
Pelo	2.9104e-09	0.437529	0.65	0.522	6.17966e-05
Mrpl36	4.25964e-08	0.437576	0.732	0.651	0.000904449
Rangrf	5.52503e-10	0.438088	0.514	0.348	1.17313e-05
Nsmce1	2.40163e-08	0.438169	0.691	0.61	0.000509938
Ndufs7	1.23882e-08	0.438277	0.873	0.833	0.000263038
Cd47	7.50718e-09	0.438448	0.914	0.975	0.0001594
Nfe2l1	1.10302e-10	0.438456	0.891	0.891	2.34204e-06
Arf4	2.62526e-08	0.438513	0.968	0.994	0.000557421
Rheb	7.28739e-08	0.438565	0.914	0.939	0.00154733
Srpr	1.13352e-09	0.438719	0.909	0.95	2.40679e-05
Ddx27	1.14288e-09	0.438739	0.668	0.58	2.42667e-05
Chmp3	8.37112e-10	0.438822	0.85	0.827	1.77744e-05
Psat1	4.70716e-12	0.438825	0.436	0.22	9.99471e-08
Socs2	4.05626e-07	0.438947	0.868	0.852	0.00861266
Sap18	1.37972e-07	0.439026	0.895	0.876	0.00292956
Sdhc	9.3322e-10	0.439125	0.855	0.788	1.98151e-05
Fkbp1a	1.1674e-07	0.43926	0.927	0.977	0.00247874
Rrp8	3.40937e-09	0.439315	0.568	0.446	7.23911e-05
Uqcrq	1.37708e-06	0.439518	0.936	0.959	0.0292396
Cstb	9.11116e-07	0.440028	0.945	0.959	0.0193457
Cetn2	7.95774e-10	0.440265	0.7	0.587	1.68967e-05
Clptm1l	2.98791e-09	0.440325	0.891	0.883	6.34423e-05
Atp5g3	3.67727e-09	0.440569	0.932	0.945	7.80794e-05
Tmem38b	1.17083e-10	0.440737	0.605	0.425	2.48602e-06
Wdr61	6.04631e-10	0.440918	0.732	0.677	1.28381e-05
Prelid3b	2.16911e-09	0.440979	0.732	0.649	4.60567e-05
Pdcl3	7.79852e-09	0.441464	0.8	0.746	0.000165586
Prr7	5.50068e-07	0.441615	0.627	0.537	0.0116796
Ift27	1.70882e-10	0.442072	0.773	0.728	3.62834e-06
Irf2bp2	1.3186e-07	0.442228	0.818	0.77	0.00279978
Denr	2.63265e-08	0.442416	0.905	0.889	0.000558992
Slc48a1	1.19326e-10	0.442534	0.668	0.526	2.53366e-06
Rps8	7.03316e-08	0.442704	1	1	0.00149335
Fh1	9.6038e-09	0.442748	0.745	0.626	0.000203917
Tmem256	7.66125e-08	0.442769	0.868	0.885	0.00162671
Abhd14a	2.75873e-10	0.442865	0.773	0.711	5.85762e-06
Ppp1r2	4.08829e-09	0.44295	0.864	0.899	8.68067e-05
Suclg2	9.00745e-10	0.443017	0.577	0.409	1.91255e-05
Tpt1	3.68217e-07	0.443472	1	1	0.00781835
Med30	2.25023e-09	0.443488	0.605	0.467	4.77791e-05
Gspt1	3.39684e-09	0.443597	0.886	0.934	7.21252e-05
Ndufb4	3.51363e-07	0.44362	0.886	0.883	0.00746048
Chid1	5.8317e-10	0.443663	0.755	0.689	1.23824e-05
Pfn2	2.02319e-10	0.443732	0.495	0.35	4.29583e-06
Dynll2	2.32087e-08	0.443892	0.805	0.708	0.00049279
Sdcbp	1.05406e-10	0.44407	0.932	0.964	2.23809e-06
Emc4	5.78264e-10	0.445456	0.768	0.65	1.22783e-05
Srp14	2.57988e-08	0.445495	0.891	0.906	0.000547786
Rps12	1.55564e-07	0.445598	1	0.998	0.00330309
Cdc26	2.43802e-08	0.445741	0.723	0.705	0.000517665
Dlat	8.41436e-11	0.445902	0.673	0.537	1.78662e-06
Hnrnpa0	2.48266e-10	0.446128	0.955	0.978	5.27143e-06
Lap3	5.00102e-08	0.446176	0.814	0.776	0.00106187
H3f3b	1.69686e-07	0.446552	0.991	0.993	0.00360295
Gpaa1	7.12987e-11	0.44669	0.714	0.557	1.51388e-06
Slc16a1	1.18693e-08	0.447124	0.559	0.43	0.000252021
Selenot	5.16365e-11	0.447614	0.868	0.852	1.0964e-06
Pdcd5	2.10764e-08	0.447656	0.9	0.9	0.000447516
Gm16286	1.55632e-10	0.447686	0.827	0.854	3.30454e-06
Hsph1	8.66434e-09	0.447719	0.586	0.481	0.00018397
Shisa5	2.58358e-09	0.447891	0.927	0.926	5.48572e-05
Ppp1r11	1.31698e-07	0.448211	0.759	0.689	0.00279634
Ak1	1.11251e-07	0.448565	0.786	0.792	0.00236219
Ifngr1	1.67863e-10	0.448613	0.855	0.865	3.56423e-06
Smim11	1.31675e-08	0.448712	0.814	0.737	0.000279587
Tbcb	3.39676e-08	0.449048	0.868	0.872	0.000721233
Rpl7	3.83623e-07	0.449243	0.991	0.996	0.00814548
Hsp90b1	7.69571e-08	0.449617	1	0.999	0.00163403
Rpf2	2.52103e-11	0.449773	0.518	0.343	5.35291e-07
Nedd8	3.9612e-08	0.44979	0.909	0.944	0.000841081
Atp6v0e	5.84478e-08	0.450075	0.891	0.932	0.00124102
Emc6	2.50085e-09	0.450277	0.809	0.781	5.31004e-05
Ndufaf7	3.98989e-12	0.450327	0.473	0.308	8.47174e-08
Dph3	1.64486e-08	0.450389	0.832	0.813	0.000349254
U2af2	7.75802e-12	0.450538	0.845	0.734	1.64726e-07
Ndufaf4	5.99997e-11	0.450587	0.668	0.488	1.27397e-06
Ddx24	1.3555e-10	0.45087	0.864	0.91	2.87814e-06
Ube2m	1.69109e-07	0.451268	0.895	0.913	0.0035907
Tnfsf12	1.50003e-11	0.451294	0.791	0.72	3.18501e-07
Ifnar2	9.94157e-10	0.451323	0.905	0.907	2.11089e-05
Rhoa	1.80315e-09	0.451387	0.977	0.992	3.82862e-05
Exosc1	3.08131e-11	0.451818	0.645	0.513	6.54255e-07
Gemin6	6.01935e-16	0.451823	0.332	0.141	1.27809e-11
Myg1	1.45011e-11	0.451858	0.627	0.411	3.07902e-07
Idh3a	3.54777e-09	0.452278	0.714	0.559	7.53298e-05
Mrpl18	1.01519e-07	0.452738	0.795	0.727	0.00215556
Acadsb	5.78538e-11	0.452866	0.764	0.628	1.22841e-06
Bub3	1.66507e-09	0.452937	0.755	0.685	3.53544e-05
Eloc	1.51526e-07	0.453692	0.923	0.915	0.00321735
Rpl23	4.58043e-08	0.453774	1	0.998	0.000972563
Ildr2	8.2987e-08	0.453824	0.323	0.233	0.00176206
Ndufb8	8.49835e-08	0.454383	0.905	0.905	0.00180445
Ncbp2	5.88424e-10	0.454581	0.786	0.638	1.2494e-05
Smn1	2.93071e-10	0.454898	0.65	0.576	6.22278e-06
Lmnb1	1.79502e-07	0.455008	0.518	0.431	0.00381137
Nsa2	1.54903e-11	0.455384	0.945	0.951	3.28905e-07
Srsf9	5.14567e-08	0.455385	0.841	0.824	0.00109258
Pcna	7.10769e-08	0.455436	0.768	0.731	0.00150918
Ndufb2	1.0288e-07	0.455456	0.859	0.884	0.00218446
Cdk2ap2	2.72411e-08	0.455509	0.705	0.651	0.000578409
Glrx5	1.50192e-08	0.4558	0.814	0.788	0.000318902
Zfp593	1.15802e-10	0.456366	0.673	0.519	2.45883e-06
Gtf2b	4.45894e-10	0.456659	0.727	0.65	9.46767e-06
Tma16	2.81721e-09	0.456704	0.682	0.571	5.98179e-05
Ckap4	5.22171e-08	0.456948	0.95	0.985	0.00110873
Rpl28	5.83674e-08	0.457303	1	1	0.00123931
Ywhah	2.66865e-08	0.457454	0.882	0.915	0.000566635
Wdr74	3.83011e-11	0.457848	0.65	0.505	8.13246e-07
Ilf2	3.37781e-10	0.457875	0.827	0.725	7.1721e-06
Rps15a	6.97662e-07	0.457888	0.995	0.998	0.0148134
Fscn1	2.68702e-07	0.457976	0.814	0.842	0.00570535
Nop14	1.92007e-10	0.458143	0.755	0.644	4.07689e-06
Snrpa1	4.83807e-08	0.458263	0.768	0.744	0.00102727
Swi5	5.39513e-08	0.458308	0.973	0.971	0.00114555
Wdr36	2.87239e-13	0.458339	0.641	0.494	6.09895e-09
Pak1	1.37601e-08	0.458367	0.514	0.473	0.000292167
Mrps26	7.32257e-10	0.458378	0.75	0.641	1.5548e-05
Eci1	1.02813e-10	0.458504	0.682	0.489	2.18303e-06
1110038B12Rik	1.20649e-07	0.459058	0.9	0.87	0.00256173
Ndufb9	4.48762e-08	0.459472	0.891	0.919	0.000952856
Elof1	4.34292e-09	0.459914	0.759	0.7	9.22131e-05
Rps20	1.78427e-07	0.460176	1	0.999	0.00378854
Mrps5	1.04888e-10	0.460277	0.659	0.547	2.22709e-06
Rpl27	5.32081e-08	0.460345	0.982	0.993	0.00112977
Ndufa4	4.27589e-07	0.460548	0.923	0.958	0.009079
Uqcrb	1.61918e-07	0.460626	0.936	0.927	0.00343801
Gcat	1.38646e-12	0.460676	0.414	0.222	2.94386e-08
Abcf2	5.1532e-12	0.461166	0.714	0.595	1.09418e-07
Pqlc1	7.26724e-07	0.46125	0.782	0.821	0.0154305
Actb	3.21635e-07	0.461346	0.995	0.998	0.00682927
Igsf8	6.58397e-09	0.461927	0.859	0.808	0.000139797
Ndufs5	1.2347e-07	0.461931	0.9	0.911	0.00262164
Tmed2	3.02143e-08	0.461959	0.968	0.975	0.000641541
Ext2	5.25548e-11	0.462279	0.859	0.845	1.1159e-06
Hmgn5	1.94709e-08	0.462397	0.545	0.425	0.000413425
Hax1	1.59737e-10	0.462602	0.723	0.58	3.39169e-06
Pet100	1.08406e-11	0.462638	0.859	0.781	2.30178e-07
Hnrnpk	6.65605e-10	0.462831	0.959	0.981	1.41328e-05
Rpl31	3.12649e-08	0.462834	0.982	0.991	0.000663847
Ppp2r1a	6.64939e-13	0.462861	0.868	0.871	1.41187e-08
Nelfe	6.51684e-12	0.4633	0.686	0.593	1.38372e-07
Prdx6	1.8979e-07	0.46337	0.923	0.918	0.00402982
Thyn1	7.38923e-10	0.463486	0.605	0.452	1.56896e-05
Rpl22l1	5.91448e-07	0.463585	0.959	0.991	0.0125582
Dpp9	8.52698e-12	0.463633	0.705	0.602	1.81053e-07
Tomm7	2.87004e-08	0.463909	0.941	0.94	0.000609396
mt-Nd5	2.94896e-08	0.464065	0.941	0.982	0.000626154
Smad6	6.07811e-09	0.46436	0.341	0.122	0.000129056
Mtln	2.33254e-09	0.464465	0.577	0.433	4.95268e-05
Vasp	4.18552e-08	0.464521	0.759	0.742	0.000888711
Wdr55	3.17171e-16	0.46464	0.468	0.251	6.7345e-12
Emilin1	3.99572e-09	0.464838	0.941	0.984	8.48411e-05
Strap	5.55977e-09	0.464917	0.868	0.891	0.000118051
Tapbp	1.77472e-09	0.46497	0.877	0.871	3.76827e-05
Rpl34	1.35915e-07	0.465153	1	0.995	0.00288588
Magoh	2.69179e-09	0.465429	0.868	0.848	5.71548e-05
Cct8	4.332e-09	0.466052	0.927	0.956	9.19813e-05
Gstt1	5.38645e-08	0.466228	0.486	0.426	0.00114371
Hnrnpa3	1.29803e-09	0.466283	0.941	0.978	2.7561e-05
Cox8a	1.1347e-07	0.467022	0.968	0.973	0.00240931
Chpt1	1.95575e-12	0.467109	0.705	0.617	4.15264e-08
Pdk1	1.81275e-16	0.467453	0.386	0.191	3.84902e-12
Dap3	5.29517e-10	0.467599	0.764	0.772	1.12432e-05
Polr2c	3.64685e-10	0.467948	0.782	0.733	7.74335e-06
Chrac1	1.87426e-10	0.467967	0.827	0.739	3.97962e-06
Fkbp8	1.01503e-11	0.468032	0.891	0.886	2.15522e-07
Eef2	2.00276e-10	0.468377	0.973	0.995	4.25246e-06
Gsta3	8.24782e-11	0.468612	0.245	0.085	1.75126e-06
Rps4x	1.21817e-07	0.468712	0.995	0.999	0.00258654
Mrps25	1.69387e-10	0.468739	0.691	0.603	3.5966e-06
Rpl35a	2.03224e-08	0.468792	0.991	0.998	0.000431506
Anxa5	5.59864e-08	0.469246	0.95	0.996	0.00118876
Dpy30	1.14528e-09	0.46941	0.627	0.573	2.43178e-05
Atic	1.3068e-09	0.46963	0.695	0.585	2.77474e-05
Mrpl57	3.15123e-08	0.469698	0.805	0.773	0.000669101
Trmt112	3.67308e-10	0.46995	0.832	0.842	7.79906e-06
Hdgf	8.99681e-10	0.470639	0.932	0.956	1.91029e-05
Cad	2.50005e-11	0.470726	0.605	0.451	5.30837e-07
Tcof1	3.3595e-10	0.470762	0.6	0.478	7.13322e-06
Nt5c	1.93681e-09	0.471677	0.75	0.676	4.11244e-05
Dnajc15	2.55209e-10	0.472053	0.7	0.605	5.41886e-06
Pole3	1.82789e-09	0.47244	0.723	0.614	3.88117e-05
Psma1	1.30287e-09	0.472723	0.873	0.869	2.76639e-05
Pomp	7.57545e-09	0.472941	0.918	0.919	0.000160849
Eef2kmt	1.75191e-12	0.473255	0.541	0.371	3.71983e-08
Morf4l2	1.21035e-10	0.473394	0.941	0.967	2.56994e-06
Hspa9	4.82133e-09	0.473573	0.9	0.941	0.000102371
Cks1b	6.49884e-07	0.473967	0.632	0.626	0.013799
Mphosph10	1.71928e-11	0.474132	0.727	0.589	3.65054e-07
Rps7	8.21366e-08	0.474348	1	0.996	0.00174401
Map3k6	5.05011e-16	0.474522	0.5	0.274	1.07229e-11
Sec13	1.41565e-08	0.474608	0.914	0.89	0.000300585
Rbx1	6.55672e-09	0.475024	0.927	0.937	0.000139219
Bambi	5.35723e-08	0.47537	0.491	0.269	0.0011375
Cetn4	2.12082e-22	0.475729	0.386	0.128	4.50314e-18
Ndufa12	6.26519e-08	0.475796	0.909	0.852	0.00133029
Snhg6	2.50289e-08	0.476145	0.909	0.909	0.000531438
Lrrc59	1.41429e-07	0.476291	0.927	0.94	0.00300296
Llph	1.46907e-10	0.476849	0.873	0.851	3.11927e-06
Mesd	6.66801e-11	0.477042	0.759	0.701	1.41582e-06
Cox6b1	1.97252e-08	0.477048	0.932	0.964	0.000418825
Mgat2	7.95938e-11	0.477123	0.882	0.903	1.69002e-06
Rpa3	1.14293e-09	0.477161	0.627	0.471	2.42678e-05
Ppia	3.09276e-07	0.477348	0.995	0.995	0.00656687
Ndufv2	5.72832e-10	0.477656	0.873	0.857	1.21629e-05
Mrpl20	2.77466e-08	0.477688	0.886	0.865	0.000589144
Clec2d	1.87692e-06	0.477783	0.668	0.607	0.0398526
Tmem234	3.50587e-11	0.477898	0.9	0.918	7.44401e-07
Selenok	8.27383e-10	0.478285	0.968	0.973	1.75678e-05
Mrps17	2.45636e-11	0.478471	0.818	0.718	5.21558e-07
Dtymk	6.76513e-08	0.478648	0.786	0.71	0.00143644
Drg2	8.02429e-13	0.478827	0.627	0.443	1.7038e-08
Hspa14	9.63847e-13	0.479142	0.682	0.495	2.04654e-08
Col6a6	7.6658e-14	0.479893	0.209	0.08	1.62768e-09
Carhsp1	9.27894e-11	0.479911	0.85	0.831	1.9702e-06
Emilin2	9.25091e-10	0.480193	0.464	0.265	1.96425e-05
Gusb	8.99791e-12	0.480222	0.818	0.767	1.91053e-07
Kctd11	2.55296e-08	0.480646	0.595	0.525	0.000542071
Slc35b1	4.24232e-09	0.480856	0.859	0.824	9.00773e-05
Eif3d	1.08457e-10	0.480872	0.909	0.875	2.30286e-06
F2r	2.66613e-07	0.480965	0.877	0.879	0.00566099
Srsf2	4.22332e-11	0.481029	0.955	0.958	8.96738e-07
Nudt4	1.85764e-07	0.48112	0.832	0.856	0.00394433
Glipr2	5.82148e-08	0.481271	0.814	0.841	0.00123607
Dhrs7	1.37248e-11	0.481471	0.805	0.783	2.91418e-07
Lpcat3	5.75258e-11	0.48181	0.677	0.56	1.22145e-06
Camp	3.02364e-11	0.482262	0.123	0.035	6.42009e-07
Eef1b2	1.17641e-07	0.482361	0.973	0.995	0.00249786
Ndufb6	1.30232e-08	0.482392	0.864	0.835	0.000276521
Psmc2	2.53814e-08	0.482414	0.841	0.809	0.000538923
Wdfy1	4.57144e-10	0.482423	0.773	0.63	9.70653e-06
Ddx3x	1.04728e-12	0.482564	0.918	0.936	2.22369e-08
Prpf19	1.46623e-11	0.482719	0.755	0.622	3.11326e-07
Sf3b6	4.48496e-10	0.483631	0.877	0.865	9.52292e-06
H2-K1	4.45219e-08	0.483927	0.923	0.971	0.000945334
Psmg1	2.31205e-09	0.484582	0.609	0.508	4.90917e-05
Psmb10	1.52711e-08	0.485103	0.759	0.624	0.00032425
Dnlz	8.10693e-11	0.485243	0.745	0.738	1.72134e-06
Sqor	5.6913e-12	0.485427	0.555	0.396	1.20843e-07
Psmd3	8.93728e-11	0.485602	0.85	0.857	1.89765e-06
Bola1	4.81939e-10	0.485603	0.568	0.409	1.0233e-05
Gm2000	6.64641e-09	0.485703	0.855	0.637	0.000141123
Hprt	2.0437e-10	0.486119	0.782	0.733	4.3394e-06
Tpm4	2.93136e-09	0.486435	0.973	0.993	6.22415e-05
Ndufs2	6.40106e-11	0.486489	0.918	0.903	1.35914e-06
Chic2	5.05429e-11	0.486567	0.886	0.911	1.07318e-06
Apln	3.27655e-16	0.487122	0.155	0.039	6.95709e-12
Actg1	1.22317e-06	0.487739	0.986	0.998	0.0259716
Pebp1	1.67367e-08	0.487836	0.941	0.944	0.00035537
Surf2	5.57374e-15	0.488234	0.541	0.32	1.18347e-10
Scp2	1.5003e-09	0.488278	0.905	0.865	3.18558e-05
Pgs1	2.25422e-12	0.488299	0.668	0.548	4.78639e-08
Gng11	1.62462e-07	0.488499	0.777	0.713	0.00344956
Hint1	3.04813e-08	0.488759	0.968	0.963	0.00064721
Pin4	3.7759e-11	0.488791	0.764	0.638	8.01737e-07
Rspo3	2.92262e-07	0.488851	0.1	0.03	0.00620561
Rps27l	9.6146e-07	0.489035	0.923	0.944	0.0204147
Aurkaip1	1.05903e-09	0.489285	0.864	0.826	2.24864e-05
Psmc5	8.94987e-09	0.489533	0.886	0.868	0.000190033
Uba1	1.03613e-11	0.489794	0.855	0.868	2.20001e-07
Rps27a	4.23317e-08	0.490156	0.991	0.996	0.000898828
Ssbp4	9.42984e-12	0.490202	0.85	0.783	2.00224e-07
Tmem33	3.63714e-12	0.490415	0.8	0.712	7.72273e-08
Hacd1	7.00644e-08	0.490446	0.759	0.629	0.00148768
1600002K03Rik	1.35048e-12	0.490466	0.591	0.453	2.86748e-08
Rpl18a	4.33504e-09	0.4907	0.995	0.998	9.20459e-05
Nqo2	6.99163e-14	0.490703	0.55	0.365	1.48453e-09
Alkbh5	7.40864e-13	0.490856	0.823	0.785	1.57308e-08
Mrps34	7.26491e-11	0.491277	0.714	0.609	1.54256e-06
Pfdn2	3.15965e-12	0.491717	0.895	0.864	6.70888e-08
Txn1	9.63408e-08	0.491742	0.973	0.987	0.0020456
Ap1s1	1.42282e-09	0.49229	0.791	0.761	3.02108e-05
Tbca	1.29346e-09	0.49271	0.9	0.944	2.74641e-05
Snrpg	1.2291e-08	0.49289	0.936	0.958	0.000260975
Mrpl15	4.99957e-10	0.493662	0.75	0.698	1.06156e-05
Yae1d1	3.19825e-12	0.493682	0.618	0.45	6.79085e-08
Thop1	2.24675e-12	0.493733	0.595	0.406	4.77052e-08
Rpl12	1.33041e-08	0.493975	1	1	0.000282485
Eef1akmt1	4.76695e-10	0.494206	0.668	0.512	1.01217e-05
Cops7a	5.7889e-12	0.494211	0.745	0.727	1.22916e-07
Galk1	2.16624e-08	0.49502	0.759	0.725	0.000459959
Scamp3	1.37341e-11	0.495472	0.791	0.71	2.91617e-07
Exosc5	1.36578e-12	0.495828	0.595	0.446	2.89996e-08
Atf6b	5.60207e-16	0.496149	0.723	0.521	1.18949e-11
Psma5	2.11531e-09	0.496401	0.886	0.888	4.49143e-05
Ndufa6	3.64899e-11	0.49643	0.891	0.911	7.7479e-07
Pak1ip1	1.11327e-12	0.496497	0.832	0.795	2.36382e-08
Nsun2	3.41083e-11	0.497159	0.836	0.735	7.24221e-07
Atp5l	1.09995e-09	0.497399	0.964	0.966	2.33552e-05
Dbi	5.66892e-07	0.497572	0.936	0.972	0.0120368
Btf3	9.3232e-09	0.497807	0.973	0.982	0.00019796
Prelid1	1.01454e-09	0.497817	0.932	0.937	2.15417e-05
Ret	1.94959e-09	0.497974	0.305	0.16	4.13956e-05
Eif1ax	1.94271e-09	0.498065	0.886	0.872	4.12496e-05
Psmb5	3.68171e-08	0.498529	0.882	0.893	0.000781738
Ywhab	4.95806e-13	0.499075	0.95	0.968	1.05274e-08
Capg	1.00085e-07	0.49991	0.895	0.893	0.0021251
Trap1	1.62937e-12	0.500076	0.686	0.535	3.45965e-08
Rnf7	9.07164e-10	0.500276	0.859	0.838	1.92618e-05
Ndufaf8	5.73745e-13	0.500653	0.814	0.74	1.21823e-08
Gpx1	2.2461e-09	0.500814	0.945	0.967	4.76914e-05
Imp4	8.69571e-13	0.50085	0.682	0.509	1.84636e-08
Dnaja2	6.69538e-10	0.501026	0.895	0.936	1.42163e-05
Ntrk2	4.55157e-07	0.501141	0.168	0.046	0.00966436
Rpl17	4.8368e-09	0.501257	0.995	0.999	0.0001027
Cnpy3	2.26924e-12	0.501313	0.764	0.65	4.81829e-08
Birc2	1.93369e-08	0.501693	0.586	0.511	0.000410581
Ptgis	1.89818e-08	0.501751	0.95	0.974	0.00040304
Dynll1	1.46424e-07	0.502661	0.959	0.965	0.00310903
Rps10	8.87895e-09	0.50319	0.995	0.998	0.000188527
Ssrp1	1.92343e-10	0.503621	0.809	0.786	4.08401e-06
Anapc13	1.23446e-11	0.504276	0.9	0.859	2.62112e-07
Zcchc17	2.45983e-10	0.504341	0.673	0.569	5.22296e-06
Ddx41	1.86958e-14	0.504535	0.682	0.573	3.96968e-10
Ppan	1.42221e-12	0.504584	0.714	0.603	3.01978e-08
Tipin	3.771e-12	0.504744	0.514	0.34	8.00697e-08
Hnrnpa1	9.11762e-09	0.504816	0.973	0.965	0.000193594
Mrps24	2.33884e-10	0.504936	0.868	0.848	4.96605e-06
Srp19	3.01424e-11	0.505066	0.886	0.902	6.40013e-07
Arhgdib	1.81827e-06	0.505131	0.6	0.574	0.0386072
Rpl37a	6.21159e-10	0.505389	0.995	0.996	1.31891e-05
Coq7	1.75731e-12	0.505432	0.586	0.452	3.73129e-08
Ptges3	7.10624e-13	0.505789	0.927	0.957	1.50887e-08
Rpl8	1.85407e-09	0.507138	0.991	0.999	3.93675e-05
Skil	9.12697e-09	0.507271	0.832	0.811	0.000193793
Camk2n1	1.75602e-10	0.507483	0.668	0.575	3.72856e-06
Anp32e	3.09211e-10	0.507542	0.736	0.559	6.56547e-06
Ndufb3	2.3982e-10	0.507642	0.864	0.844	5.0921e-06
Sub1	7.68802e-11	0.507658	0.9	0.94	1.6324e-06
Degs1	8.10033e-11	0.507984	0.868	0.877	1.71994e-06
Cox5b	2.37423e-09	0.50823	0.927	0.944	5.04121e-05
Rbm8a	1.53178e-12	0.508289	0.873	0.858	3.25244e-08
Lsm5	9.60401e-09	0.509562	0.764	0.715	0.000203922
Rack1	1.67749e-09	0.509672	0.995	0.999	3.56182e-05
Glrx	9.77226e-12	0.50978	0.495	0.331	2.07494e-07
Rps19	8.71169e-10	0.510004	1	0.998	1.84975e-05
Exosc8	1.06778e-10	0.510034	0.591	0.456	2.26721e-06
Slc25a3	1.2548e-11	0.510357	0.95	0.994	2.66433e-07
Pes1	2.09205e-13	0.510453	0.641	0.479	4.44204e-09
Ptma	1.5968e-09	0.510837	0.991	0.998	3.39048e-05
Mrps7	2.93794e-12	0.511069	0.827	0.749	6.23813e-08
Ncln	1.66482e-10	0.511221	0.818	0.759	3.53491e-06
Snrpb	1.79309e-10	0.511837	0.891	0.944	3.80726e-06
Psma4	1.61172e-09	0.511913	0.914	0.932	3.42216e-05
Rpl27a	2.78872e-09	0.512781	1	1	5.92129e-05
Aimp2	2.82115e-13	0.512802	0.695	0.578	5.99014e-09
Hif1a	2.08683e-08	0.513549	0.877	0.911	0.000443096
Sumo2	1.01194e-09	0.514422	0.941	0.947	2.14866e-05
Ntn1	7.7537e-09	0.514571	0.6	0.403	0.000164634
Set	3.11608e-09	0.51507	0.95	0.952	6.61637e-05
Dnmt3l	1.79443e-17	0.515403	0.45	0.207	3.81012e-13
Mrpl23	2.43058e-11	0.515743	0.859	0.826	5.16084e-07
Wdr83os	1.39052e-11	0.516295	0.9	0.893	2.95249e-07
Rab5if	8.19539e-10	0.516423	0.909	0.876	1.74013e-05
Ero1l	3.18777e-09	0.516522	0.745	0.667	6.7686e-05
Mrpl27	5.34974e-12	0.517095	0.773	0.708	1.13591e-07
Mak16	8.27917e-13	0.517144	0.741	0.68	1.75792e-08
Lman2	1.59891e-12	0.517392	0.909	0.922	3.39496e-08
Rps3a1	1.30997e-09	0.518324	0.995	0.996	2.78146e-05
Zpr1	2.27243e-13	0.518492	0.741	0.621	4.82504e-09
Mrps14	2.49583e-09	0.518564	0.841	0.808	5.29939e-05
Penk	2.13511e-06	0.518866	0.114	0.033	0.0453347
Hsd17b10	1.13715e-10	0.51919	0.818	0.767	2.41452e-06
Rbmxl1	7.43843e-12	0.519228	0.686	0.561	1.5794e-07
Hikeshi	2.32836e-11	0.519275	0.755	0.683	4.9438e-07
Rpl23a	3.85454e-10	0.519277	0.977	0.994	8.18435e-06
Tmem45a	4.53314e-09	0.519638	0.877	0.906	9.62522e-05
[truncated: 661 more rows]

## Sheet: 4 Fibroblasts 2
	p_val	avg_log2FC	pct.1	pct.2	p_val_adj
Cmss1	2.03984e-78	-2.69096	0.247	0.514	4.3312e-74
Maml2	1.07069e-61	-2.16625	0.382	0.573	2.2734e-57
Gpc6	7.91245e-65	-2.03486	0.737	0.823	1.68005e-60
Zfpm2	4.92329e-60	-2.00423	0.408	0.623	1.04536e-55
Grk5	1.39836e-50	-1.92797	0.592	0.678	2.96913e-46
Pcdh9	2.26996e-46	-1.89449	0.443	0.575	4.8198e-42
Abi1	2.69857e-51	-1.89443	0.737	0.728	5.72986e-47
Airn	1.18113e-51	-1.84768	0.31	0.535	2.5079e-47
Camk1d	6.52794e-49	-1.77906	0.244	0.478	1.38608e-44
Mast4	1.11597e-47	-1.72337	0.836	0.855	2.36953e-43
Pdzrn3	1.27389e-38	-1.71648	0.34	0.549	2.70485e-34
Lncpint	3.0204e-42	-1.65579	0.467	0.657	6.41321e-38
Ghr	7.39585e-42	-1.57756	0.782	0.787	1.57036e-37
Gab2	9.41739e-46	-1.54193	0.589	0.686	1.99959e-41
Prkg1	1.20318e-38	-1.53686	0.117	0.368	2.55471e-34
Gphn	7.35477e-42	-1.51448	0.316	0.465	1.56164e-37
Magi2	2.80728e-35	-1.49616	0.244	0.387	5.9607e-31
Rbms3	1.73547e-43	-1.49293	0.833	0.827	3.68493e-39
Kcnt2	1.77852e-40	-1.44709	0.568	0.663	3.77633e-36
Sox5	1.39617e-36	-1.44529	0.414	0.543	2.96449e-32
Glis3	7.55001e-23	-1.44411	0.172	0.248	1.60309e-18
Ldlrad4	3.2601e-41	-1.42751	0.576	0.676	6.92218e-37
Myo1d	2.56322e-27	-1.42617	0.318	0.463	5.44248e-23
Atrnl1	6.09683e-41	-1.4089	0.507	0.608	1.29454e-36
Large1	2.96646e-39	-1.4036	0.313	0.488	6.29868e-35
March3	1.20406e-34	-1.36206	0.175	0.402	2.55657e-30
Tenm3	6.25177e-38	-1.34645	0.464	0.627	1.32744e-33
Slc8a1	5.05408e-33	-1.33202	0.332	0.501	1.07313e-28
Sgcd	4.89511e-30	-1.27742	0.207	0.385	1.03938e-25
Fbxl7	1.5705e-28	-1.26215	0.446	0.558	3.33465e-24
Pde4d	3.38894e-21	-1.24668	0.345	0.381	7.19575e-17
Ext1	1.82374e-28	-1.24317	0.748	0.758	3.87235e-24
Zswim6	2.35564e-28	-1.22674	0.39	0.533	5.00173e-24
Arl15	1.50452e-32	-1.21737	0.289	0.467	3.19455e-28
Dip2c	7.75851e-31	-1.19186	0.369	0.501	1.64736e-26
Sdk1	1.66072e-22	-1.18105	0.178	0.269	3.52622e-18
Chil1	5.99305e-08	-1.18081	0.098	0.352	0.0012725
Pard3b	1.60026e-31	-1.16585	0.469	0.562	3.39783e-27
Slc4a4	5.13218e-14	-1.09485	0.294	0.307	1.08971e-09
Mecom	5.62669e-25	-1.09102	0.533	0.56	1.19472e-20
Mir99ahg	5.96368e-25	-1.08098	0.668	0.726	1.26627e-20
Ptprm	1.73965e-29	-1.07403	0.342	0.48	3.69381e-25
Slit2	6.79563e-19	-1.0696	0.252	0.381	1.44292e-14
Pde3a	2.77355e-20	-1.05206	0.451	0.522	5.88907e-16
Pde1a	8.67159e-22	-1.04515	0.666	0.682	1.84124e-17
Apbb2	3.82997e-19	-1.03559	0.401	0.488	8.13217e-15
Cacna1c	1.02376e-25	-1.02832	0.172	0.343	2.17374e-21
Bach2	6.91726e-29	-1.01952	0.088	0.331	1.46874e-24
Fmnl2	1.02363e-21	-1.01143	0.448	0.533	2.17348e-17
Akt3	4.26153e-30	-1.00485	0.281	0.491	9.0485e-26
Wwox	1.70131e-22	-1.0018	0.127	0.28	3.6124e-18
B3galt1	3.90538e-26	-0.995744	0.141	0.343	8.29228e-22
Btbd9	2.34632e-25	-0.995322	0.456	0.562	4.98194e-21
Mcc	3.79412e-19	-0.993302	0.438	0.503	8.05606e-15
Setbp1	1.24283e-23	-0.983128	0.403	0.556	2.63891e-19
Naaladl2	1.42763e-23	-0.983006	0.085	0.267	3.03128e-19
Ank2	2.80912e-24	-0.963185	0.668	0.714	5.96461e-20
Robo1	6.97665e-16	-0.953849	0.358	0.337	1.48135e-11
Rora	7.10699e-22	-0.942882	0.907	0.882	1.50903e-17
Arih1	7.58654e-20	-0.939955	0.822	0.773	1.61085e-15
Bnc2	2.68252e-23	-0.929671	0.17	0.377	5.6958e-19
Fos	4.26311e-11	-0.925551	0.867	0.886	9.05186e-07
Diaph2	8.62604e-23	-0.918345	0.496	0.575	1.83157e-18
Arhgap24	2.8798e-13	-0.914764	0.499	0.432	6.11468e-09
Fn1	1.07607e-09	-0.906929	0.653	0.707	2.28481e-05
Tnc	3.56253e-08	-0.903816	0.202	0.309	0.000756432
Sik3	1.27171e-21	-0.888747	0.525	0.608	2.70022e-17
Ltbp2	2.77442e-07	-0.871283	0.276	0.419	0.00589093
Pvt1	1.35299e-20	-0.867581	0.159	0.328	2.8728e-16
Dlc1	1.98207e-18	-0.867011	0.793	0.752	4.20853e-14
Eda	7.24065e-20	-0.866861	0.3	0.421	1.53741e-15
Ust	3.03538e-21	-0.865362	0.308	0.404	6.44503e-17
Prkcg	6.84407e-16	-0.859923	0.09	0.211	1.4532e-11
Arhgap6	2.05827e-20	-0.850065	0.35	0.505	4.37033e-16
Fbxl17	1.81884e-23	-0.84214	0.361	0.486	3.86195e-19
Bcas3	4.27723e-23	-0.84098	0.196	0.389	9.08183e-19
Lsamp	7.14822e-11	-0.840757	0.443	0.375	1.51778e-06
Psd3	6.03721e-20	-0.832979	0.602	0.691	1.28188e-15
Samd4	8.76256e-17	-0.821175	0.645	0.703	1.86056e-12
Pcsk5	4.61504e-13	-0.819801	0.39	0.476	9.79911e-09
Tspan5	2.38065e-15	-0.818512	0.31	0.404	5.05483e-11
Prkca	3.62959e-17	-0.817989	0.645	0.632	7.7067e-13
Lrmda	2.49499e-13	-0.81617	0.008	0.179	5.29762e-09
Thsd7a	1.19162e-12	-0.812287	0.615	0.533	2.53017e-08
Nedd4l	1.88649e-15	-0.797769	0.292	0.415	4.00558e-11
Tmtc2	1.10196e-11	-0.792619	0.042	0.126	2.33979e-07
Plcl1	1.3321e-20	-0.783096	0.17	0.337	2.82844e-16
Celf2	1.81706e-16	-0.78251	0.952	0.888	3.85816e-12
Srgap1	2.62723e-11	-0.779921	0.276	0.314	5.5784e-07
Rapgef2	2.29991e-21	-0.779146	0.294	0.467	4.88339e-17
Efna5	1.26889e-14	-0.770729	0.294	0.381	2.69424e-10
Cdk14	5.18163e-18	-0.76416	0.584	0.621	1.10022e-13
Rere	3.97142e-19	-0.758191	0.536	0.642	8.43251e-15
Cacna2d1	1.5967e-16	-0.752876	0.56	0.619	3.39027e-12
Gpr39	2.4328e-08	-0.745932	0.281	0.354	0.000516557
Auts2	3.92825e-17	-0.742708	0.743	0.773	8.34086e-13
Rgs6	1.64198e-11	-0.742326	0.106	0.162	3.48641e-07
Vav3	5.57821e-16	-0.738022	0.411	0.491	1.18442e-11
Trps1	5.95827e-13	-0.733494	0.796	0.766	1.26512e-08
Magi1	4.54224e-19	-0.728183	0.08	0.259	9.64454e-15
Rnf217	4.14284e-10	-0.72734	0.424	0.459	8.7965e-06
Pbx1	7.22276e-14	-0.726758	0.74	0.72	1.53361e-09
Zbtb7c	7.57983e-19	-0.72468	0.183	0.392	1.60943e-14
Slit3	1.37323e-07	-0.722955	0.568	0.421	0.00291579
Pam	4.09697e-17	-0.715246	0.989	0.975	8.69909e-13
Rasal2	7.25816e-19	-0.709417	0.281	0.444	1.54113e-14
Esrrg	2.84842e-13	-0.707383	0.016	0.126	6.04806e-09
Hivep2	9.52188e-12	-0.705303	0.889	0.84	2.02178e-07
Ambra1	1.32599e-19	-0.701613	0.244	0.411	2.81548e-15
Exoc4	1.95076e-16	-0.70073	0.507	0.575	4.14205e-12
Plxdc2	5.82576e-16	-0.696779	0.912	0.901	1.23698e-11
Cped1	1.77356e-15	-0.695683	0.708	0.737	3.76581e-11
Xylt1	1.22486e-11	-0.694551	0.443	0.476	2.60075e-07
Dennd1a	4.41278e-18	-0.689294	0.324	0.461	9.36965e-14
Ube2e2	9.56248e-16	-0.687341	0.597	0.606	2.0304e-11
Cobll1	9.58934e-13	-0.686445	0.114	0.215	2.0361e-08
Negr1	2.48818e-12	-0.686072	0.324	0.36	5.28315e-08
Elmo1	1.40912e-12	-0.680247	0.44	0.429	2.99199e-08
Ror1	9.05999e-12	-0.678812	0.35	0.392	1.92371e-07
Atxn1	1.06359e-14	-0.673416	0.462	0.512	2.25831e-10
Kansl1	3.85364e-16	-0.672611	0.568	0.604	8.18244e-12
Ebf1	1.60902e-11	-0.670049	0.931	0.939	3.41642e-07
Lama2	3.91057e-17	-0.669705	0.963	0.943	8.30332e-13
Clasp2	3.27274e-12	-0.663105	0.602	0.592	6.94902e-08
Klf12	2.74592e-16	-0.66182	0.162	0.297	5.83041e-12
Pcdh7	1.6603e-09	-0.659751	0.531	0.524	3.52533e-05
9530026P05Rik	1.17099e-16	-0.659477	0.066	0.211	2.48636e-12
Rabgap1l	8.84135e-13	-0.657044	0.459	0.528	1.87728e-08
Arhgap10	1.66159e-15	-0.65524	0.533	0.594	3.52804e-11
Tmcc1	1.56698e-16	-0.653027	0.464	0.558	3.32716e-12
Map3k5	1.00927e-14	-0.651305	0.194	0.333	2.14298e-10
Ppp3ca	2.96441e-12	-0.648127	0.83	0.836	6.29432e-08
Zfp521	6.44789e-15	-0.64715	0.332	0.459	1.36908e-10
Cdk8	3.62659e-16	-0.645059	0.597	0.716	7.70035e-12
Meox1	8.94927e-07	-0.6437	0.435	0.528	0.019002
Cmip	1.22697e-11	-0.63561	0.618	0.629	2.60522e-07
Nr6a1	3.47065e-16	-0.632981	0.077	0.234	7.36923e-12
Fhit	4.03417e-16	-0.627867	0.048	0.192	8.56574e-12
Zeb1	1.57996e-12	-0.626578	0.844	0.867	3.35473e-08
Pde7b	9.94023e-15	-0.625145	0.027	0.16	2.11061e-10
Btaf1	5.19316e-13	-0.624915	0.435	0.52	1.10266e-08
Svep1	2.18729e-10	-0.621767	0.57	0.657	4.64428e-06
Egfr	5.91012e-09	-0.620207	0.756	0.705	0.00012549
Dlg2	1.13655e-10	-0.618323	0.249	0.28	2.41324e-06
Fam172a	9.63987e-14	-0.617039	0.469	0.524	2.04683e-09
Ehbp1	3.78526e-16	-0.607211	0.276	0.419	8.03725e-12
Ankrd28	1.01325e-10	-0.606473	0.483	0.507	2.15144e-06
Il31ra	1.51872e-12	-0.602593	0.008	0.263	3.2247e-08
Ptprj	7.16255e-10	-0.600842	0.525	0.476	1.52083e-05
Aopep	5.45701e-10	-0.60001	0.594	0.686	1.15869e-05
Arhgef3	1.05621e-11	-0.599661	0.231	0.318	2.24265e-07
Prickle1	9.89206e-15	-0.59743	0.095	0.263	2.10038e-10
Abtb2	1.04499e-12	-0.594447	0.162	0.291	2.21882e-08
Olfr1033	1.83734e-08	-0.592757	0.379	0.385	0.000390123
Ubash3b	1.20483e-11	-0.591203	0.239	0.387	2.55822e-07
Zfand3	2.25211e-14	-0.588732	0.645	0.699	4.7819e-10
Parp8	5.96768e-11	-0.588634	0.316	0.387	1.26712e-06
Mid1	2.97646e-10	-0.58596	0.363	0.362	6.31992e-06
Cep85l	2.71821e-11	-0.585589	0.3	0.389	5.77158e-07
Pde10a	7.70478e-08	-0.584873	0.358	0.335	0.00163596
Cblb	3.53918e-09	-0.584175	0.578	0.575	7.51475e-05
Gmds	5.82993e-12	-0.581672	0.371	0.427	1.23787e-07
Magi3	1.0225e-12	-0.579504	0.313	0.423	2.17108e-08
Ern1	8.49426e-13	-0.578622	0.244	0.335	1.80359e-08
Utrn	2.93062e-11	-0.576499	0.552	0.621	6.22258e-07
Smurf2	7.52765e-12	-0.576242	0.52	0.549	1.59835e-07
Pard3	3.23524e-14	-0.575514	0.462	0.539	6.86939e-10
Jarid2	1.28891e-07	-0.574576	0.477	0.549	0.00273675
Nbea	1.95851e-12	-0.573528	0.451	0.518	4.15851e-08
Itpr1	2.82927e-13	-0.57277	0.653	0.728	6.00739e-09
Prkn	1.17934e-15	-0.564848	0.032	0.187	2.50409e-11
Trio	4.6559e-12	-0.553955	0.597	0.608	9.88587e-08
Unc5c	3.1387e-10	-0.549573	0.082	0.166	6.66441e-06
Baz2b	2.13974e-10	-0.543379	0.716	0.739	4.54331e-06
Slc7a5	2.79159e-15	-0.541986	0.164	0.326	5.92738e-11
Cpne8	3.82001e-09	-0.541267	0.554	0.577	8.11102e-05
2610035D17Rik	9.69208e-16	-0.537626	0.101	0.253	2.05792e-11
Etv6	4.99093e-13	-0.532488	0.408	0.478	1.05972e-08
Arhgap21	9.45016e-11	-0.527747	0.687	0.691	2.00655e-06
Frmd4a	7.51727e-08	-0.525073	0.512	0.528	0.00159614
Bmp6	1.81749e-08	-0.517797	0.379	0.497	0.000385909
Dock4	1.63819e-10	-0.514982	0.17	0.267	3.47837e-06
Foxp2	2.42767e-07	-0.511562	0.544	0.575	0.00515467
Smyd3	2.8845e-12	-0.511027	0.154	0.263	6.12465e-08
Ebf2	1.41015e-07	-0.510802	0.682	0.688	0.00299416
Arhgap42	1.39328e-09	-0.510108	0.39	0.436	2.95835e-05
Atp10a	3.59764e-10	-0.509146	0.321	0.404	7.63886e-06
Gucy1a2	3.28769e-14	-0.50607	0.08	0.24	6.98074e-10
Epha7	9.74086e-09	-0.502632	0.154	0.223	0.000206828
Uty	7.42152e-11	-0.501268	0.236	0.339	1.57581e-06
Plekha6	1.16803e-12	-0.499527	0.477	0.657	2.48007e-08
Ano6	1.27302e-08	-0.496285	0.61	0.615	0.000270301
Apba1	2.0652e-12	-0.495612	0.257	0.364	4.38504e-08
Txnip	1.83861e-06	-0.493614	0.464	0.556	0.0390392
Zfp407	1.14692e-13	-0.493101	0.164	0.318	2.43526e-09
Mcu	8.69079e-12	-0.492808	0.34	0.461	1.84532e-07
Asap1	2.95003e-10	-0.492531	0.716	0.733	6.2638e-06
Phlpp1	2.19187e-12	-0.49155	0.164	0.309	4.65401e-08
Chd9	1.56366e-13	-0.490804	0.592	0.739	3.32013e-09
Exoc6b	1.3171e-09	-0.48637	0.448	0.467	2.79659e-05
Phf21a	2.57968e-10	-0.482158	0.406	0.482	5.47742e-06
Aff3	5.69259e-11	-0.481081	0.26	0.415	1.20871e-06
Aig1	2.24642e-06	-0.480368	0.637	0.627	0.0476983
Atp11c	2.41059e-10	-0.478602	0.241	0.324	5.11841e-06
Sik2	7.53417e-08	-0.477055	0.369	0.406	0.00159973
Cers6	5.98272e-09	-0.475653	0.231	0.301	0.000127031
Sh3rf3	7.83378e-13	-0.475467	0.093	0.236	1.66335e-08
Smg6	2.47404e-10	-0.475384	0.398	0.478	5.25314e-06
Nup210l	1.84307e-12	-0.473992	0.042	0.168	3.9134e-08
Lrch3	6.56695e-11	-0.472679	0.443	0.535	1.39436e-06
Gpr176	6.96643e-08	-0.472464	0.045	0.124	0.00147918
Prickle2	1.05209e-09	-0.472406	0.252	0.383	2.23391e-05
Zhx2	3.11806e-08	-0.468215	0.321	0.4	0.000662057
2210408I21Rik	2.014e-13	-0.466262	0.053	0.204	4.27633e-09
Atp9b	4.96312e-10	-0.465589	0.432	0.491	1.05382e-05
Dock11	3.62696e-08	-0.458346	0.31	0.354	0.000770112
Nsmce2	5.70841e-09	-0.457254	0.475	0.493	0.000121207
Snx29	1.15797e-11	-0.454274	0.154	0.267	2.45872e-07
Arid1b	3.49317e-09	-0.454048	0.607	0.596	7.41704e-05
Vti1a	2.20418e-10	-0.452569	0.268	0.362	4.68013e-06
Rbfox1	2.8069e-10	-0.446947	0.048	0.149	5.95989e-06
Peak1	1.23622e-08	-0.446622	0.647	0.682	0.000262488
Mast2	3.2693e-08	-0.446268	0.446	0.486	0.00069417
Myo1e	2.87918e-08	-0.446218	0.199	0.295	0.000611336
Myo9a	1.36299e-08	-0.445313	0.456	0.528	0.000289404
Prkce	2.36757e-09	-0.443299	0.257	0.349	5.02706e-05
Agmo	1.69346e-08	-0.439837	0.276	0.339	0.000359571
Tbc1d5	2.47924e-08	-0.439096	0.321	0.347	0.000526417
Garem1	2.59011e-08	-0.436801	0.095	0.162	0.000549959
Pdlim5	3.07735e-07	-0.432904	0.732	0.709	0.00653415
Maml3	2.40758e-09	-0.432362	0.149	0.244	5.112e-05
Rps6ka5	1.12498e-12	-0.431386	0.122	0.291	2.38867e-08
Lcor	1.0805e-11	-0.431083	0.194	0.349	2.29424e-07
Slc41a2	1.17198e-08	-0.427767	0.284	0.36	0.000248846
Pakap	2.3531e-11	-0.423222	0.069	0.2	4.99635e-07
Cask	3.16983e-07	-0.422317	0.475	0.493	0.0067305
Hdac8	2.656e-11	-0.420881	0.09	0.208	5.63948e-07
Runx1t1	1.72195e-07	-0.415532	0.294	0.389	0.00365622
Dlg1	2.26926e-08	-0.414811	0.549	0.575	0.000481832
Sorbs1	4.12917e-07	-0.413518	0.273	0.316	0.00876747
Cacnb2	3.00552e-07	-0.41288	0.056	0.107	0.00638162
Mllt10	9.64016e-10	-0.410444	0.342	0.451	2.04689e-05
Rapgef6	3.62722e-07	-0.40957	0.549	0.585	0.00770168
Mbd5	6.65474e-10	-0.407694	0.241	0.362	1.413e-05
Dtnb	4.14325e-11	-0.405692	0.098	0.202	8.79737e-07
Asxl1	6.77216e-08	-0.404601	0.371	0.425	0.00143793
Ncoa2	1.35716e-08	-0.40413	0.308	0.429	0.000288166
Chsy3	2.21599e-06	-0.401411	0.276	0.293	0.0470521
Il16	1.57494e-10	-0.400959	0.13	0.267	3.34407e-06
Igf1r	1.80104e-07	-0.400789	0.647	0.695	0.00382415
Nox4	4.08464e-07	-0.400673	0.199	0.295	0.00867292
Piezo2	5.42704e-07	-0.399826	0.156	0.221	0.0115232
Numb	5.1214e-09	-0.396995	0.374	0.459	0.000108743
Ppp2r3a	3.06282e-07	-0.395055	0.525	0.545	0.00650329
Farp1	1.90102e-08	-0.393124	0.403	0.512	0.000403643
Arhgap28	5.53186e-08	-0.392776	0.119	0.177	0.00117458
Gulp1	1.01339e-07	-0.392353	0.456	0.465	0.00215173
Uba52	1.36006e-06	-0.392301	0.984	0.962	0.0288781
Rnf150	7.40823e-08	-0.391576	0.284	0.379	0.00157299
Dgkh	3.84531e-07	-0.391457	0.233	0.295	0.00816474
Plxna2	5.63095e-07	-0.390576	0.281	0.36	0.0119562
Mrtfa	1.14715e-09	-0.389652	0.223	0.333	2.43574e-05
Fndc3a	1.22705e-06	-0.387468	0.775	0.747	0.0260539
Tcf12	2.05047e-06	-0.386837	0.74	0.68	0.0435376
Mbnl2	1.67082e-07	-0.386397	0.958	0.939	0.00354766
Stard13	3.91075e-07	-0.384452	0.318	0.379	0.0083037
Tanc2	3.34463e-07	-0.383211	0.252	0.339	0.00710166
Stag1	2.09308e-07	-0.383173	0.724	0.722	0.00444424
Hecw2	3.05464e-08	-0.38162	0.082	0.143	0.000648591
Ranbp9	3.79462e-07	-0.380606	0.469	0.486	0.00805712
Ralgapa1	3.70189e-08	-0.380511	0.411	0.476	0.000786023
Kif13b	1.77636e-07	-0.379714	0.464	0.581	0.00377174
Fyn	2.32479e-06	-0.376058	0.711	0.756	0.0493622
Rftn1	1.00151e-06	-0.376029	0.451	0.516	0.0212651
Crim1	9.90582e-07	-0.375288	0.332	0.406	0.021033
Dcaf6	6.34676e-08	-0.375045	0.247	0.331	0.00134761
Klhl29	1.21936e-09	-0.37453	0.058	0.156	2.58906e-05
Rfx3	1.61239e-09	-0.371025	0.101	0.208	3.4236e-05
Sh3rf1	2.76704e-07	-0.370244	0.228	0.303	0.00587525
Smurf1	4.10261e-07	-0.368883	0.414	0.478	0.00871107
Tmem164	2.81319e-10	-0.367077	0.156	0.303	5.97325e-06
Fbxo11	4.20428e-07	-0.364772	0.554	0.575	0.00892695
Dock1	3.55266e-07	-0.364579	0.512	0.533	0.00754336
Pltp	7.31038e-07	-0.36387	0.329	0.478	0.0155221
Csnk1g1	4.37523e-08	-0.36273	0.305	0.425	0.000928993
Galnt17	7.40638e-07	-0.361782	0.239	0.32	0.015726
Thrb	3.24322e-07	-0.357562	0.119	0.185	0.00688634
Pknox2	2.03881e-07	-0.354001	0.247	0.343	0.00432901
Arhgap44	3.82235e-09	-0.348643	0.082	0.187	8.11599e-05
Lypd1	5.81812e-12	-0.346961	0.042	0.219	1.23536e-07
Pbx3	2.32034e-06	-0.344353	0.289	0.288	0.0492678
Znrf3	6.96755e-10	-0.343827	0.08	0.192	1.47942e-05
Lonrf3	1.06239e-06	-0.340821	0.085	0.154	0.0225578
Ide	7.23237e-08	-0.33987	0.324	0.476	0.00153565
Nhs	2.24826e-09	-0.338851	0.05	0.164	4.77372e-05
Atxn7l1	4.5135e-08	-0.337125	0.17	0.267	0.000958351
Nf1	1.22647e-06	-0.336082	0.424	0.469	0.0260416
Vps13b	5.72475e-07	-0.334478	0.271	0.352	0.0121554
Mtmr3	1.93781e-07	-0.333874	0.377	0.459	0.00411456
Ralgapa2	6.83559e-08	-0.333814	0.127	0.211	0.0014514
Stk3	2.63964e-07	-0.333111	0.374	0.438	0.00560475
Synpo2	2.14508e-08	-0.329419	0.09	0.181	0.000455464
Fnbp1	6.09462e-08	-0.327252	0.408	0.52	0.00129407
Thada	1.14576e-09	-0.326518	0.093	0.232	2.4328e-05
Usp32	1.07363e-06	-0.319689	0.329	0.392	0.0227964
Cep112	2.54282e-08	-0.318115	0.143	0.248	0.000539916
Snx24	6.72422e-07	-0.317716	0.31	0.381	0.0142775
Rnf169	2.67679e-08	-0.317259	0.172	0.28	0.000568363
Armh3	4.14661e-11	-0.313712	0.045	0.183	8.8045e-07
Zdhhc14	5.20745e-08	-0.313187	0.117	0.219	0.0011057
Tom1l2	2.36106e-07	-0.311923	0.247	0.32	0.00501325
Stxbp5	3.32955e-07	-0.308956	0.302	0.413	0.00706964
Fbxw7	1.04276e-06	-0.303461	0.268	0.366	0.022141
mt-Nd3	1.78927e-07	-0.298929	0.992	0.987	0.00379915
Ctif	1.62185e-06	-0.297841	0.228	0.299	0.0344367
Zfp385b	9.55717e-07	-0.297628	0.045	0.124	0.0202927
Sesn1	6.68161e-07	-0.291621	0.212	0.314	0.0141871
Scfd2	2.5154e-07	-0.286419	0.106	0.198	0.00534095
Fmn1	1.51851e-06	-0.283002	0.066	0.145	0.0322425
Rngtt	5.78284e-07	-0.282231	0.204	0.297	0.0122787
Mitf	1.62489e-07	-0.280521	0.114	0.227	0.00345012
Ctdspl	1.79112e-06	-0.279246	0.416	0.526	0.0380308
Lrch1	4.29028e-07	-0.278263	0.077	0.164	0.00910956
Camkmt	9.43504e-07	-0.276572	0.098	0.177	0.0200334
Lin52	2.7128e-08	-0.275446	0.061	0.152	0.000576008
Pdgfd	1.35268e-06	-0.272868	0.056	0.135	0.0287214
Greb1l	1.02225e-06	-0.272161	0.085	0.179	0.0217055
Plxna4	1.6945e-06	-0.269891	0.069	0.185	0.0359794
Nxpe4	2.4657e-09	-0.261481	0.027	0.147	5.23541e-05
Fgfr2	4.14195e-09	-0.256449	0.042	0.173	8.79461e-05
Nr3c2	2.73525e-07	-0.254002	0.056	0.139	0.00580776
Mthfd1l	9.54692e-07	-0.253899	0.09	0.187	0.020271
Fam214a	2.24114e-06	-0.252665	0.146	0.284	0.0475862
Ikzf5	1.7253e-06	0.252443	0.446	0.282	0.0366333
Inhbb	2.83583e-07	0.254291	0.18	0.091	0.00602132
Arhgef1	1.45148e-06	0.254549	0.621	0.455	0.0308193
Emc1	3.21667e-08	0.254586	0.427	0.257	0.000682996
Rnaset2b	4.04547e-09	0.25522	0.345	0.173	8.58975e-05
Mrps5	5.38177e-07	0.255826	0.496	0.333	0.0114271
Wdr74	2.86667e-07	0.256618	0.424	0.267	0.0060868
Sp3os	4.29969e-07	0.256788	0.252	0.162	0.00912954
Sf3b4	8.31844e-07	0.256855	0.496	0.352	0.0176625
Chchd7	4.9395e-07	0.256941	0.448	0.309	0.010488
Pop4	3.49899e-08	0.25709	0.379	0.232	0.00074294
Cetn4	2.04961e-11	0.25921	0.199	0.046	4.35194e-07
Imp4	4.85142e-07	0.2603	0.422	0.282	0.010301
Med30	3.83464e-07	0.262237	0.493	0.339	0.0081421
Smn1	1.72579e-07	0.263084	0.467	0.291	0.00366438
Jagn1	8.44756e-07	0.263927	0.459	0.331	0.0179367
Washc2	1.98153e-06	0.264897	0.509	0.343	0.0420738
Dhrs4	5.04885e-07	0.266053	0.512	0.356	0.0107202
Mob3c	7.96401e-08	0.266249	0.363	0.202	0.001691
Naglu	1.62634e-06	0.266663	0.435	0.293	0.0345322
Naa10	3.61963e-07	0.267375	0.477	0.314	0.00768556
Zmpste24	6.22438e-07	0.26782	0.565	0.398	0.0132162
Atp13a1	6.7351e-08	0.268093	0.443	0.255	0.00143006
Mettl23	9.80575e-07	0.268574	0.584	0.465	0.0208205
Osgep	1.29097e-06	0.268754	0.623	0.469	0.0274111
Scyl1	2.12046e-06	0.268823	0.584	0.451	0.0450237
Rrp7a	1.27786e-07	0.269131	0.435	0.28	0.00271328
Mrps18a	9.88994e-07	0.270196	0.639	0.469	0.0209993
Snrpa	7.15875e-07	0.270466	0.602	0.461	0.0152002
Mrpl50	4.38173e-07	0.27053	0.427	0.291	0.00930373
Polr1c	2.92994e-07	0.270627	0.528	0.337	0.00622115
M6pr	1.88371e-06	0.270915	0.557	0.44	0.0399968
Samm50	1.1375e-06	0.271435	0.634	0.482	0.0241525
Plpbp	3.70219e-07	0.271538	0.544	0.408	0.00786086
Noc2l	5.90742e-07	0.271869	0.464	0.286	0.0125432
Prpf19	1.42814e-07	0.273074	0.552	0.408	0.00303238
Mtfr1l	1.24666e-06	0.273356	0.639	0.432	0.0264703
Lsm3	2.0018e-07	0.273714	0.541	0.377	0.00425041
Tmx1	6.60483e-07	0.273732	0.653	0.448	0.014024
Son	2.06677e-08	0.274051	0.995	0.968	0.000438837
Ube2q1	1.13152e-07	0.274297	0.528	0.347	0.00240256
Idh3b	5.69216e-07	0.274701	0.594	0.429	0.0120862
Acyp1	1.08179e-07	0.275041	0.408	0.263	0.00229696
Cd59a	4.86717e-07	0.276064	0.271	0.137	0.0103345
Fh1	2.26721e-07	0.27638	0.536	0.377	0.00481396
Pum3	9.28932e-07	0.276932	0.562	0.389	0.019724
Exosc8	2.39044e-08	0.276964	0.443	0.238	0.000507563
Hars	4.36426e-07	0.27731	0.565	0.415	0.00926663
Mme	1.28333e-07	0.277407	0.265	0.114	0.00272489
Zbtb21	1.00033e-07	0.277567	0.443	0.305	0.002124
Mocs2	1.85439e-06	0.277868	0.655	0.482	0.0393743
Trmt1	1.21461e-07	0.27875	0.469	0.318	0.00257899
Bcas2	2.12546e-06	0.279032	0.7	0.535	0.0451298
Hspb11	1.89316e-06	0.279062	0.546	0.387	0.0401974
Dld	9.96277e-07	0.279764	0.645	0.497	0.021154
Mrpl35	4.12821e-08	0.279963	0.512	0.343	0.000876543
Tmem184c	7.35274e-08	0.280393	0.435	0.255	0.00156121
Nr1h2	3.41408e-07	0.280631	0.615	0.459	0.00724912
Plekhf1	5.19944e-07	0.280896	0.382	0.204	0.01104
AC149090.1	3.87048e-07	0.281307	0.411	0.278	0.00821819
Psmb7	1.43767e-06	0.281332	0.79	0.657	0.030526
Aplp2	2.18006e-06	0.281363	0.95	0.901	0.0462891
Ccdc47	8.19341e-07	0.281481	0.613	0.476	0.0173971
Lsm2	3.95341e-07	0.281574	0.507	0.341	0.00839427
Hras	1.20705e-06	0.282176	0.695	0.528	0.0256293
Ncbp2	4.26826e-07	0.282393	0.562	0.396	0.0090628
Trip6	5.95703e-07	0.282879	0.512	0.375	0.0126486
Med10	1.26339e-06	0.283278	0.568	0.408	0.0268255
Psmd9	2.01792e-08	0.283395	0.541	0.368	0.000428464
Trp53	6.64996e-07	0.283402	0.645	0.507	0.0141199
Pno1	1.09266e-07	0.283405	0.385	0.225	0.00232005
Mrpl4	5.25084e-07	0.283699	0.671	0.499	0.0111491
Chrd	9.21994e-08	0.283732	0.377	0.248	0.00195767
Cops7a	1.25146e-06	0.283975	0.605	0.484	0.0265722
Dimt1	2.3592e-08	0.284453	0.408	0.269	0.000500929
Yme1l1	1.67038e-06	0.284453	0.711	0.556	0.0354672
Mrps26	5.89244e-08	0.28466	0.56	0.373	0.00125114
Gpaa1	1.30377e-08	0.284689	0.448	0.265	0.00027683
Vldlr	6.63567e-07	0.284701	0.334	0.192	0.0140895
Dpp9	2.957e-07	0.284811	0.48	0.326	0.00627859
Eif2s3x	1.21253e-06	0.284958	0.554	0.44	0.0257458
Tmem9b	7.99997e-07	0.285145	0.581	0.442	0.0169863
4930453N24Rik	2.34391e-07	0.285234	0.509	0.331	0.00497683
Tmbim4	1.15269e-06	0.285269	0.777	0.611	0.024475
Mrpl32	1.2894e-06	0.285697	0.581	0.438	0.0273779
Gdi1	1.59297e-07	0.285797	0.562	0.402	0.00338235
Zfp281	1.70213e-07	0.285909	0.43	0.272	0.00361414
Bub3	1.06424e-06	0.286057	0.584	0.44	0.0225969
Srp19	2.1046e-06	0.286366	0.777	0.632	0.0446869
Wdr77	4.05177e-08	0.286542	0.345	0.204	0.000860312
C1galt1c1	3.99612e-08	0.287045	0.398	0.269	0.000848495
Mcts1	1.00704e-06	0.287208	0.586	0.432	0.0213825
Ppl	1.57383e-06	0.287559	0.279	0.139	0.0334171
Cap1	1.2824e-06	0.287971	0.674	0.518	0.0272292
Got2	5.02789e-07	0.288157	0.57	0.427	0.0106757
Fam133b	1.91677e-06	0.288637	0.703	0.539	0.0406988
Zfp106	1.2376e-06	0.288684	0.703	0.539	0.026278
Yy1	1.98835e-06	0.288686	0.78	0.665	0.0422187
Skp1a	2.18671e-06	0.288817	0.798	0.684	0.0464305
Ccdc86	2.8188e-07	0.289037	0.443	0.28	0.00598516
Ptpmt1	4.23299e-07	0.289475	0.597	0.438	0.0089879
Rab5c	2.15665e-06	0.289531	0.804	0.705	0.0457922
Asnsd1	6.75524e-07	0.28961	0.467	0.335	0.0143434
Ids	4.92751e-08	0.29099	0.512	0.326	0.00104626
Lsm5	3.42261e-07	0.291097	0.562	0.408	0.00726722
Il10rb	1.43873e-07	0.2916	0.546	0.387	0.00305486
Npr1	1.25497e-08	0.291694	0.294	0.145	0.000266468
Fkbp14	6.71438e-07	0.291762	0.56	0.413	0.0142566
Utp3	4.01136e-07	0.292087	0.568	0.423	0.00851733
Man2b2	3.19348e-09	0.292214	0.321	0.164	6.78072e-05
Actr10	2.28468e-07	0.292266	0.743	0.608	0.00485107
Zfp622	1.36528e-06	0.292336	0.523	0.379	0.0289889
Riok2	2.27905e-07	0.292593	0.403	0.269	0.00483912
Cyp27a1	2.01178e-06	0.292621	0.602	0.455	0.0427162
Nop16	1.13335e-06	0.292974	0.387	0.265	0.0240644
Ppp2r1a	9.73417e-07	0.29347	0.756	0.648	0.0206686
Glb1	2.02378e-06	0.293731	0.544	0.398	0.042971
Kxd1	6.28517e-07	0.293835	0.584	0.467	0.0133453
Ctnnb1	1.54862e-06	0.293835	0.902	0.863	0.0328819
Eif4ebp2	3.93534e-07	0.293835	0.565	0.419	0.0083559
Ppt1	4.84043e-07	0.294022	0.634	0.499	0.0102777
Sqor	1.70352e-07	0.294631	0.57	0.387	0.00361708
Sdhd	3.19731e-07	0.294799	0.663	0.503	0.00678885
Uqcrc2	1.23232e-06	0.295078	0.767	0.585	0.0261659
Pus1	2.76477e-10	0.295093	0.363	0.175	5.87044e-06
Ube2n	2.33923e-06	0.295736	0.812	0.712	0.0496688
Gtf2b	2.26238e-07	0.295937	0.599	0.421	0.0048037
Pcna	2.01726e-06	0.295966	0.703	0.581	0.0428324
Cetn2	9.70444e-08	0.296294	0.586	0.385	0.00206054
Brd9	4.6666e-08	0.296416	0.615	0.457	0.000990859
Pla2g12a	4.71646e-08	0.296428	0.411	0.255	0.00100145
Psmd3	3.83995e-07	0.296797	0.703	0.524	0.00815337
Cxxc1	4.02837e-07	0.296934	0.557	0.404	0.00855345
Etfa	1.50888e-06	0.29709	0.782	0.653	0.0320381
Nqo2	1.22645e-07	0.297562	0.363	0.208	0.00260413
Tmem248	5.75821e-07	0.297629	0.721	0.594	0.0122264
Ube2e3	2.75804e-07	0.297699	0.695	0.518	0.00585615
Becn1	2.26465e-07	0.297958	0.621	0.476	0.00480853
Banf1	2.06806e-06	0.298126	0.78	0.657	0.0439112
Nomo1	1.0897e-07	0.298148	0.509	0.339	0.00231377
Rad23a	1.18264e-06	0.298213	0.637	0.528	0.0251111
Spock2	5.81595e-10	0.298272	0.263	0.124	1.2349e-05
Naalad2	1.95764e-06	0.29906	0.862	0.777	0.0415665
Tmem128	1.1299e-07	0.299179	0.538	0.366	0.00239911
mt-Cytb	2.96597e-07	0.299254	0.997	0.996	0.00629764
Armcx2	9.27775e-07	0.299369	0.493	0.366	0.0196994
Srp14	1.7013e-06	0.299395	0.891	0.827	0.0361237
Ncln	4.78706e-07	0.299592	0.573	0.408	0.0101644
Pgs1	1.34922e-08	0.299888	0.475	0.276	0.00028648
Sidt2	9.3879e-07	0.299952	0.692	0.577	0.0199333
Asph	2.04422e-06	0.300196	0.645	0.541	0.0434049
Tsnax	4.64505e-08	0.300291	0.507	0.356	0.000986283
Fmc1	1.52063e-06	0.301014	0.682	0.503	0.0322876
Sdhb	5.76888e-07	0.301032	0.78	0.646	0.0122491
Yae1d1	6.34086e-07	0.301148	0.369	0.248	0.0134635
Egln1	4.56369e-07	0.301237	0.703	0.611	0.00969009
Emc6	1.09531e-06	0.301321	0.637	0.474	0.0232567
St13	1.05063e-06	0.301442	0.849	0.804	0.022308
Ddx39	1.07133e-08	0.301654	0.353	0.215	0.000227475
Adprh	1.22728e-06	0.301775	0.727	0.64	0.0260588
Ddx1	2.15338e-06	0.301885	0.69	0.571	0.0457227
Eif4h	6.96116e-07	0.302044	0.867	0.758	0.0147806
Sap30l	4.40844e-07	0.302245	0.748	0.611	0.00936044
Dnlz	5.08428e-07	0.302297	0.576	0.427	0.0107955
Scoc	1.06651e-07	0.302788	0.568	0.404	0.00226452
Egln2	5.46448e-08	0.302818	0.533	0.352	0.00116027
Bbip1	2.27712e-07	0.302989	0.592	0.467	0.00483501
Zrsr2	1.17465e-07	0.303085	0.732	0.581	0.00249413
Nol3	1.68278e-07	0.303136	0.374	0.234	0.00357305
Rnps1	1.82798e-07	0.30365	0.66	0.526	0.00388135
Ebp	4.55829e-07	0.304019	0.666	0.535	0.00967861
Lmo1	1.88289e-10	0.304109	0.305	0.122	3.99793e-06
Rrp9	9.46382e-08	0.304126	0.419	0.267	0.00200945
mt-Nd2	1.07401e-08	0.304305	0.997	0.996	0.000228044
Rbm15	1.65656e-10	0.304412	0.424	0.225	3.51737e-06
Zfp593	8.84383e-09	0.305028	0.398	0.24	0.000187781
Map3k6	5.05817e-08	0.305307	0.488	0.295	0.001074
Cnpy3	7.17815e-08	0.305421	0.573	0.44	0.00152414
Pfdn1	1.60592e-06	0.30558	0.764	0.638	0.0340985
Chmp3	1.35789e-06	0.305882	0.769	0.663	0.028832
Smndc1	8.83568e-08	0.30636	0.562	0.392	0.00187608
Tmem87b	1.72398e-07	0.306496	0.61	0.451	0.00366054
Bag6	2.88551e-08	0.307012	0.687	0.528	0.00061268
Abcf2	8.91417e-09	0.307092	0.475	0.301	0.000189275
Ptgr1	1.4256e-09	0.30711	0.406	0.229	3.02697e-05
Csnk2a1	9.55105e-07	0.307211	0.857	0.741	0.0202797
Gnpnat1	1.59569e-06	0.307296	0.501	0.324	0.0338813
Ppp2r2d	1.31037e-06	0.307297	0.775	0.632	0.0278232
Man2b1	1.98536e-06	0.307461	0.586	0.457	0.0421551
Rwdd1	2.21264e-06	0.307609	0.854	0.743	0.046981
Ppp4c	8.86708e-08	0.307828	0.536	0.385	0.00188275
Hibadh	5.06949e-08	0.307978	0.687	0.503	0.0010764
Gm2a	1.09785e-07	0.308107	0.684	0.566	0.00233106
Ssrp1	1.30949e-07	0.308588	0.658	0.524	0.00278043
Mrpl12	1.456e-07	0.308858	0.716	0.566	0.00309153
Arl8a	1.86925e-07	0.308868	0.676	0.52	0.00396897
Armcx3	5.78303e-07	0.308951	0.668	0.501	0.0122791
Rab11b	1.54636e-07	0.309034	0.809	0.712	0.00328338
Ctdsp2	1.35348e-06	0.3091	0.886	0.798	0.0287385
Set	1.29317e-06	0.309475	0.918	0.829	0.0274579
Ubxn6	3.70142e-08	0.309544	0.66	0.493	0.000785922
Rnf10	3.3321e-07	0.309591	0.859	0.718	0.00707504
Selenot	4.06841e-07	0.309776	0.782	0.646	0.00863846
Rnf6	2.011e-07	0.310039	0.623	0.503	0.00426995
Sptssa	4.4697e-07	0.310074	0.846	0.701	0.0094905
Cnih4	7.46167e-07	0.310192	0.767	0.6	0.0158434
Zfp330	1.54363e-07	0.310341	0.544	0.398	0.00327758
Rbm8a	1.93143e-07	0.310402	0.809	0.667	0.004101
Atxn2l	4.98498e-08	0.310571	0.743	0.571	0.00105846
Flot2	2.67446e-07	0.311233	0.618	0.503	0.00567868
Nr1h3	4.13936e-09	0.311848	0.374	0.229	8.7891e-05
Rbmxl1	3.52003e-09	0.311989	0.517	0.307	7.47407e-05
Psma2	1.05637e-06	0.311989	0.918	0.802	0.0224299
Smarce1	9.84494e-08	0.312034	0.743	0.558	0.00209038
Tbcb	1.98541e-06	0.312059	0.804	0.701	0.0421563
Chtop	6.62813e-08	0.312134	0.703	0.512	0.00140735
Diablo	1.80802e-09	0.312178	0.515	0.339	3.83896e-05
Commd4	2.62641e-08	0.312332	0.504	0.312	0.000557666
Gtf2a2	5.08078e-08	0.312918	0.78	0.634	0.0010788
Hspa13	4.42034e-07	0.31312	0.698	0.535	0.00938572
Csnk2b	2.2942e-06	0.313542	0.708	0.564	0.0487127
Krit1	1.47654e-06	0.314019	0.615	0.505	0.0313514
Copz1	1.37135e-07	0.314062	0.684	0.535	0.00291178
Stx4a	3.88093e-07	0.314469	0.745	0.642	0.00824038
Ndufs3	4.45831e-07	0.314636	0.711	0.592	0.00946633
Sp3	1.02534e-06	0.314727	0.682	0.512	0.0217711
Ccng2	1.55048e-06	0.314938	0.517	0.411	0.0329214
Slc39a7	1.15412e-06	0.315343	0.812	0.705	0.0245055
Ndufa8	5.00566e-07	0.31583	0.78	0.695	0.0106285
Chchd1	1.38582e-06	0.315928	0.732	0.535	0.0294252
Lta4h	7.22675e-09	0.316085	0.493	0.291	0.000153446
BC004004	1.32745e-07	0.316085	0.631	0.476	0.00281857
Pdcd6ip	4.46966e-07	0.31641	0.841	0.716	0.00949043
Impad1	2.67147e-07	0.316596	0.695	0.539	0.00567233
Fam174a	5.35873e-08	0.317041	0.607	0.442	0.00113782
Fam8a1	3.64725e-09	0.317061	0.552	0.356	7.7442e-05
Dnajc3	1.14819e-06	0.317061	0.966	0.905	0.0243796
Pdia5	5.85616e-08	0.317269	0.387	0.242	0.00124344
Prpf38b	3.32273e-07	0.317341	0.708	0.571	0.00705515
H13	4.22562e-08	0.317443	0.886	0.792	0.000897226
Psmc6	1.24784e-07	0.317814	0.854	0.731	0.00264954
Trappc2l	1.21307e-07	0.317817	0.671	0.577	0.00257572
Mapre1	2.11947e-07	0.317958	0.947	0.853	0.00450028
Lzts2	8.66597e-07	0.318024	0.607	0.467	0.0184005
Psmd2	1.1544e-06	0.31849	0.793	0.651	0.0245114
Qars	1.81781e-08	0.318588	0.496	0.318	0.000385975
Rnpep	1.30601e-09	0.318741	0.371	0.204	2.77305e-05
Hacd2	8.34382e-08	0.319008	0.52	0.309	0.00177164
Mdh1	1.07513e-06	0.319276	0.828	0.674	0.0228283
Prrc2c	4.93929e-07	0.319307	0.936	0.891	0.0104876
Acaa2	1.24962e-06	0.319356	0.584	0.434	0.0265333
Ociad1	5.98434e-09	0.320112	0.716	0.537	0.000127065
Ndufb3	2.06165e-07	0.320117	0.838	0.745	0.00437749
Tex261	1.5254e-07	0.320526	0.716	0.604	0.00323887
Fam111a	9.71295e-07	0.320726	0.414	0.293	0.0206235
Med8	2.90476e-09	0.320745	0.504	0.335	6.16767e-05
Pvr	7.46574e-07	0.321015	0.475	0.305	0.015852
Glmp	1.10654e-06	0.321335	0.767	0.604	0.0234951
Psmd6	2.18095e-07	0.32155	0.716	0.573	0.00463082
Mcm6	4.03364e-12	0.321913	0.223	0.044	8.56462e-08
Ubxn1	1.59725e-07	0.322279	0.889	0.802	0.00339143
Mrps24	7.57798e-07	0.322447	0.788	0.676	0.0160903
Sypl	1.56216e-07	0.322505	0.785	0.608	0.00331693
Pon3	5.03016e-09	0.322684	0.493	0.307	0.000106805
Prxl2c	1.80786e-08	0.322716	0.748	0.571	0.000383864
Eif2s1	9.48534e-07	0.322849	0.711	0.524	0.0201402
Denr	5.65182e-07	0.323012	0.782	0.617	0.0120005
Tomm22	8.18199e-08	0.323067	0.812	0.659	0.00173728
Pomp	3.08909e-07	0.323203	0.92	0.813	0.00655906
Uqcrc1	1.04768e-07	0.323208	0.748	0.6	0.00222455
Efs	4.91918e-08	0.323337	0.525	0.337	0.00104449
Sft2d1	8.97517e-12	0.323713	0.43	0.221	1.9057e-07
Htatsf1	5.99085e-08	0.323915	0.562	0.404	0.00127204
Kti12	3.13949e-09	0.32401	0.403	0.229	6.66607e-05
Rcn2	1.73801e-07	0.32401	0.838	0.682	0.00369031
Ndufs5	9.07207e-07	0.324063	0.894	0.808	0.0192627
Cltc	8.71313e-07	0.324956	0.91	0.811	0.0185006
Mrpl58	9.28128e-09	0.325142	0.52	0.331	0.000197069
Rrp15	1.67144e-08	0.325177	0.499	0.343	0.000354897
Dnm1l	2.02946e-08	0.325258	0.52	0.345	0.000430915
Ccdc50	5.31846e-07	0.325261	0.83	0.707	0.0112927
Eif4a3	1.23671e-08	0.325272	0.706	0.516	0.00026259
Pdcl3	1.31699e-07	0.32529	0.639	0.516	0.00279637
Ykt6	1.77857e-08	0.325314	0.525	0.358	0.000377644
Prdx6	1.82911e-06	0.325549	0.846	0.756	0.0388375
Atraid	8.16173e-08	0.32572	0.891	0.796	0.00173298
Mrps21	1.39382e-06	0.325868	0.836	0.714	0.0295949
Dynlrb1	1.11176e-06	0.325923	0.899	0.823	0.023606
Ndufb10	1.4391e-06	0.325998	0.833	0.768	0.0305563
Cdc42	5.27375e-07	0.326165	0.987	0.952	0.0111977
Yipf4	3.87803e-08	0.326191	0.817	0.699	0.000823423
Prmt1	3.25088e-07	0.327358	0.7	0.56	0.00690259
Mtch2	2.94222e-07	0.327474	0.708	0.554	0.00624721
Plbd2	3.50306e-08	0.327534	0.74	0.589	0.000743805
Ddx27	1.08174e-07	0.327581	0.538	0.366	0.00229685
Romo1	2.01881e-07	0.327875	0.931	0.874	0.00428654
Bcap31	7.33846e-08	0.327949	0.918	0.806	0.00155817
Clcn4	7.73169e-08	0.328025	0.756	0.648	0.00164167
H6pd	4.49272e-07	0.328114	0.56	0.467	0.0095394
Psenen	5.81414e-08	0.328126	0.867	0.749	0.00123452
Sh3bgrl	3.6891e-07	0.328223	0.886	0.821	0.00783307
Eif3g	6.00323e-08	0.329274	0.756	0.617	0.00127467
Stard3nl	6.00337e-09	0.3294	0.562	0.366	0.00012747
Prdx3	8.17001e-08	0.329405	0.523	0.354	0.00173474
Tmem237	1.1131e-08	0.32941	0.536	0.368	0.000236344
Eif4g1	1.81756e-07	0.329651	0.934	0.851	0.00385922
Cndp2	8.66725e-07	0.329928	0.573	0.461	0.0184032
Rtcb	2.70432e-08	0.329972	0.655	0.495	0.000574208
Timm23	2.01559e-06	0.330406	0.859	0.707	0.0427971
Lamtor3	7.87825e-07	0.330534	0.735	0.543	0.0167279
Fam214b	2.41865e-07	0.331027	0.355	0.196	0.00513551
Mmadhc	2.4786e-09	0.331529	0.645	0.427	5.2628e-05
Hnrnpc	6.72872e-08	0.331592	0.926	0.811	0.00142871
Insig2	4.13576e-07	0.331739	0.626	0.505	0.00878147
Jund	1.15701e-06	0.33178	1	1	0.0245668
Atp5o	2.05805e-06	0.332628	0.902	0.834	0.0436986
Emc2	1.935e-09	0.333363	0.578	0.421	4.10858e-05
Rbm22	3.68178e-09	0.333363	0.531	0.381	7.81751e-05
Fam3c	1.66497e-08	0.333363	0.66	0.457	0.000353523
Crk	4.98125e-08	0.333363	0.753	0.589	0.00105767
Ctdnep1	5.62763e-08	0.333363	0.711	0.564	0.00119492
Mageh1	1.22444e-07	0.333363	0.432	0.303	0.00259985
Gorasp2	4.36572e-07	0.333363	0.87	0.693	0.00926972
Cebpz	6.51046e-07	0.333363	0.775	0.659	0.0138237
Rex1bd	7.05781e-07	0.333363	0.793	0.663	0.0149858
Cnn3	1.73456e-06	0.333363	0.857	0.733	0.0368299
Mbd2	4.11772e-08	0.334312	0.883	0.789	0.000874316
Ptbp1	9.68979e-08	0.334456	0.859	0.724	0.00205743
H2afy	5.63299e-08	0.334562	0.833	0.682	0.00119605
Fam162a	7.7232e-07	0.334709	0.703	0.64	0.0163987
Scn7a	1.28334e-06	0.334794	0.91	0.834	0.0272492
Vps28	2.95117e-08	0.334796	0.756	0.592	0.000626622
Klhdc2	4.98432e-08	0.334822	0.74	0.568	0.00105832
Tmem33	1.07852e-08	0.335128	0.631	0.457	0.000229002
Purb	9.26791e-07	0.33524	0.867	0.743	0.0196786
Nifk	2.34912e-07	0.335303	0.488	0.375	0.0049879
Derl1	2.60226e-07	0.335511	0.859	0.697	0.00552538
Gamt	8.14072e-09	0.335608	0.422	0.251	0.000172852
Tle5	1.13631e-06	0.335828	0.966	0.947	0.0241274
Rab1a	8.04381e-08	0.335834	0.92	0.842	0.00170794
Btg3	1.88016e-06	0.335874	0.748	0.606	0.0399214
Tcn2	2.17182e-07	0.336214	0.716	0.589	0.00461143
Copb1	1.05814e-06	0.336429	0.836	0.728	0.0224675
Ndufb7	2.73072e-07	0.336462	0.857	0.735	0.00579814
Lrrc58	1.57981e-07	0.336557	0.905	0.827	0.00335442
Cggbp1	1.8427e-07	0.336855	0.817	0.676	0.0039126
Aamp	2.88903e-08	0.336921	0.822	0.693	0.000613428
Yif1b	1.49183e-07	0.337212	0.79	0.659	0.00316761
Eif2b2	7.35574e-09	0.337594	0.464	0.318	0.000156184
Tceal9	1.65201e-06	0.337804	0.923	0.811	0.0350771
Elovl1	1.58375e-07	0.337846	0.692	0.549	0.00336278
Cyth2	4.0783e-08	0.338256	0.684	0.469	0.000865944
Rnf7	1.52441e-07	0.33843	0.777	0.644	0.00323677
Rela	1.07571e-06	0.338584	0.828	0.703	0.0228406
Sept8	1.13642e-06	0.33876	0.79	0.691	0.0241297
Tmem50a	4.97042e-09	0.338808	0.976	0.914	0.000105537
Rhog	4.57462e-08	0.33901	0.536	0.411	0.000971329
Msrb1	1.65259e-07	0.339208	0.493	0.379	0.00350895
Nop10	3.15074e-07	0.339307	0.801	0.659	0.00668996
Lamtor2	1.97285e-06	0.339362	0.798	0.737	0.0418896
Rbbp4	2.07762e-09	0.339393	0.769	0.564	4.41142e-05
Acat1	4.36779e-08	0.339548	0.66	0.556	0.000927412
Svbp	4.75266e-07	0.339579	0.737	0.657	0.0100913
Polr2c	3.23751e-10	0.339891	0.727	0.554	6.87421e-06
Zmat2	1.70521e-08	0.340136	0.647	0.478	0.000362068
Clta	3.42899e-07	0.340536	0.966	0.907	0.00728078
Akr1b8	1.949e-07	0.340622	0.536	0.427	0.00413832
Npm3	1.81993e-08	0.34064	0.597	0.419	0.000386427
Ddx24	5.49277e-08	0.340858	0.836	0.739	0.00116628
Bscl2	2.38057e-09	0.341099	0.554	0.404	5.05466e-05
Pak1ip1	3.22771e-09	0.341286	0.708	0.524	6.85339e-05
Sh3glb1	5.37375e-07	0.341467	0.976	0.916	0.0114101
Hsd3b7	3.89732e-08	0.341812	0.469	0.28	0.000827518
Grina	7.7976e-07	0.341867	0.777	0.667	0.0165567
Gspt1	9.4769e-08	0.342133	0.867	0.684	0.00201223
Ndufb4	7.56873e-08	0.34306	0.891	0.808	0.00160707
Trir	1.25913e-08	0.343203	0.846	0.745	0.00026735
Pdcd5	1.10477e-08	0.343375	0.891	0.783	0.000234576
Sec62	6.17997e-09	0.343403	0.981	0.962	0.000131219
Hnrnpm	3.83666e-08	0.343623	0.862	0.693	0.000814637
Hsd17b11	2.05801e-09	0.343843	0.647	0.463	4.36976e-05
Cops9	1.63865e-07	0.34389	0.873	0.768	0.00347934
Dynlt1f	1.39254e-08	0.344154	0.414	0.305	0.000295678
Emg1	2.40018e-10	0.344678	0.777	0.646	5.09631e-06
Hnrnph2	2.99996e-09	0.344691	0.721	0.503	6.36982e-05
Tle3	2.44056e-08	0.344828	0.536	0.389	0.000518204
Rbm25	2.91387e-08	0.344926	0.947	0.846	0.000618701
Ext2	2.27916e-08	0.345274	0.716	0.562	0.000483934
Sgce	1.70127e-09	0.345546	0.878	0.796	3.61231e-05
Creb3l1	9.65967e-07	0.345694	0.658	0.486	0.0205104
Ogfr	8.9732e-09	0.345963	0.605	0.427	0.000190528
Epn1	5.25264e-09	0.34623	0.706	0.528	0.000111529
Ccni	3.9721e-08	0.346283	0.838	0.733	0.000843395
Ddb1	7.38052e-07	0.346453	0.865	0.749	0.0156711
Tcf25	1.87758e-08	0.346703	0.944	0.901	0.000398666
Pcbp2	7.35069e-09	0.34706	0.984	0.956	0.000156077
Ewsr1	9.49135e-09	0.347359	0.844	0.718	0.00020153
Taldo1	4.47452e-07	0.347612	0.764	0.676	0.00950075
Grpel1	8.6162e-09	0.34796	0.66	0.509	0.000182948
Rab5if	1.80762e-07	0.348288	0.782	0.625	0.00383812
Itm2c	2.13374e-09	0.348344	0.966	0.92	4.53057e-05
Mrpl24	4.09254e-08	0.348423	0.671	0.549	0.000868969
Atp5h	2.1982e-08	0.348541	0.987	0.933	0.000466745
Zfas1	1.60218e-06	0.348653	0.775	0.701	0.034019
Ube2v1	2.29909e-08	0.348659	0.761	0.596	0.000488166
Ppp1ca	6.77052e-07	0.348904	0.894	0.787	0.0143758
Lyar	5.21345e-09	0.348922	0.647	0.469	0.000110697
Psmb2	2.36837e-07	0.349035	0.886	0.781	0.00502875
Asah1	6.48416e-08	0.349081	0.846	0.682	0.00137678
Hdlbp	6.76779e-07	0.349488	0.976	0.933	0.0143701
Anxa6	2.59009e-07	0.349507	0.806	0.72	0.00549954
Mrps7	6.36528e-10	0.349685	0.594	0.451	1.35154e-05
Tpst1	8.78776e-09	0.349693	0.79	0.676	0.00018659
Psma5	8.84459e-09	0.349714	0.867	0.745	0.000187797
Uqcr10	4.04933e-08	0.350393	0.942	0.836	0.000859795
Tnfsf12	1.0149e-09	0.350422	0.812	0.726	2.15494e-05
Ndufaf4	1.92062e-10	0.350462	0.493	0.305	4.07805e-06
Atxn7l3b	4.46535e-09	0.350556	0.854	0.781	9.48127e-05
Ssb	3.46191e-08	0.351075	0.923	0.836	0.000735068
Cwc15	1.0246e-08	0.351159	0.788	0.659	0.000217554
Tecr	1.22977e-07	0.351409	0.878	0.728	0.00261118
Tardbp	2.76988e-09	0.351469	0.653	0.518	5.88129e-05
Ndufa2	5.92267e-09	0.351618	0.958	0.909	0.000125756
Rexo2	7.47301e-07	0.351625	0.934	0.823	0.0158674
Csnk1d	2.91818e-07	0.35195	0.849	0.663	0.00619616
Pmm1	2.29309e-08	0.352161	0.684	0.505	0.000486891
Hyou1	5.0958e-08	0.352396	0.509	0.389	0.00108199
Utp14a	4.35022e-09	0.3525	0.446	0.299	9.23683e-05
Anapc11	4.77404e-09	0.352615	0.838	0.688	0.000101367
Cnih1	2.41447e-07	0.352876	0.759	0.636	0.00512665
Arpc4	3.32851e-08	0.352916	0.743	0.592	0.000706742
Ywhae	2.25362e-08	0.353024	0.976	0.941	0.000478512
Brk1	4.41205e-08	0.353113	0.881	0.76	0.000936811
Atxn10	9.49311e-08	0.35335	0.812	0.728	0.00201567
Ola1	4.75052e-09	0.353401	0.65	0.497	0.000100868
Tmed7	6.53795e-09	0.353409	0.828	0.667	0.00013882
Ndufs6	4.75759e-08	0.353447	0.836	0.718	0.00101018
Dctn2	9.07866e-08	0.353457	0.836	0.745	0.00192767
Psmb3	1.39593e-07	0.353468	0.878	0.785	0.00296398
Dnttip2	2.1525e-09	0.353519	0.692	0.543	4.57041e-05
Snhg8	4.15494e-08	0.35359	0.897	0.808	0.000882219
Fkbp8	6.30935e-09	0.353635	0.849	0.724	0.000133966
Ppid	5.64618e-10	0.353722	0.599	0.425	1.19885e-05
Ftsj3	2.81646e-09	0.353915	0.475	0.343	5.9802e-05
Kctd10	4.06897e-07	0.353917	0.615	0.469	0.00863965
Slc35b1	9.01421e-08	0.354207	0.706	0.528	0.00191399
Eif4g2	1.30785e-08	0.354243	0.979	0.947	0.000277695
mt-Nd1	2.02614e-10	0.354499	1	0.996	4.3021e-06
Pigp	2.3603e-08	0.354521	0.761	0.613	0.000501163
Snx3	6.14227e-07	0.354785	0.912	0.777	0.0130419
Prrc1	2.84613e-08	0.355127	0.825	0.682	0.000604318
Dhx15	1.29578e-08	0.355241	0.806	0.682	0.000275134
Atox1	3.25482e-07	0.355345	0.947	0.899	0.00691097
Kars	8.02043e-11	0.355668	0.56	0.343	1.70298e-06
Vdac1	1.942e-07	0.3558	0.788	0.686	0.00412344
Bcl10	7.84137e-08	0.356183	0.782	0.604	0.00166496
Pkd1	1.4783e-07	0.356271	0.875	0.777	0.00313888
Cdc37	5.38795e-10	0.356289	0.891	0.762	1.14402e-05
Mpc1	9.23511e-09	0.35638	0.854	0.76	0.000196089
Nup62	9.83118e-10	0.35648	0.485	0.297	2.08745e-05
Rbx1	4.84524e-08	0.356582	0.923	0.855	0.00102879
Vamp8	1.09319e-07	0.356595	0.647	0.524	0.00232117
Pebp1	2.77492e-08	0.356854	0.955	0.869	0.000589199
Acaa1a	2.04976e-09	0.357161	0.751	0.554	4.35225e-05
Wbp11	8.50882e-10	0.357183	0.716	0.522	1.80668e-05
Myl12b	2.11531e-07	0.357229	0.95	0.895	0.00449143
Il6ra	1.23795e-06	0.357611	0.515	0.326	0.0262855
Eif1	3.05684e-08	0.357675	1	0.998	0.000649059
Atp5g1	1.4823e-06	0.358101	0.942	0.848	0.0314737
Map2k3	1.58613e-06	0.358102	0.782	0.672	0.0336784
Dnajc25	1.15214e-07	0.358214	0.729	0.577	0.00244635
BC005624	1.03343e-09	0.358252	0.668	0.495	2.19427e-05
Tmed10	2.78506e-08	0.358309	0.979	0.941	0.000591352
Eny2	1.3458e-08	0.358332	0.873	0.777	0.000285754
Pdcd10	1.25274e-08	0.358855	0.801	0.669	0.000265994
Anp32a	5.28744e-09	0.359034	0.801	0.651	0.000112268
Ubap2l	2.0964e-08	0.35908	0.883	0.72	0.000445129
Sys1	5.18258e-09	0.359303	0.7	0.541	0.000110042
Slirp	2.42461e-09	0.359358	0.764	0.589	5.14817e-05
Arglu1	1.4225e-08	0.35938	0.828	0.672	0.000302039
Nop56	2.28391e-07	0.359763	0.74	0.6	0.00484943
Rchy1	8.28225e-11	0.360061	0.517	0.343	1.75857e-06
Snrpb2	2.00471e-09	0.36023	0.605	0.429	4.2566e-05
Rac1	2.13723e-08	0.360478	0.981	0.926	0.000453798
Atp6ap1	2.15905e-10	0.361087	0.894	0.747	4.5843e-06
Lrpap1	3.03193e-09	0.361261	0.857	0.781	6.43771e-05
Ube2i	3.63078e-08	0.361434	0.881	0.741	0.000770925
Lman1	6.91729e-07	0.361514	0.881	0.792	0.0146875
Lysmd3	4.17678e-09	0.361597	0.568	0.381	8.86856e-05
Emc4	8.52315e-11	0.361745	0.623	0.4	1.80972e-06
Tsn	3.6762e-08	0.36191	0.854	0.701	0.000780568
Hsbp1	1.04433e-08	0.362194	0.915	0.861	0.000221744
Dkc1	5.60927e-09	0.362218	0.472	0.312	0.000119102
Ctso	1.83313e-11	0.363609	0.56	0.354	3.89228e-07
Mgat2	8.32114e-08	0.363891	0.777	0.644	0.00176683
Ddx50	2.81345e-08	0.364071	0.828	0.712	0.000597381
Hnrnpd	5.99521e-10	0.364274	0.793	0.682	1.27296e-05
Prrc2a	1.93673e-10	0.364675	0.812	0.716	4.11226e-06
Tmem258	3.48498e-07	0.364798	0.939	0.842	0.00739966
Llph	9.12312e-10	0.365163	0.761	0.621	1.93711e-05
Eloc	2.13905e-08	0.365319	0.891	0.819	0.000454185
Dusp11	1.37944e-09	0.365424	0.793	0.629	2.92896e-05
Itpripl2	1.68975e-06	0.365478	0.801	0.718	0.0358785
Gnptg	2.91721e-12	0.365876	0.568	0.362	6.19411e-08
Pdcd6	8.23107e-09	0.366069	0.854	0.726	0.00017477
Eif3c	1.03959e-08	0.366604	0.918	0.842	0.000220736
Ddx18	4.25159e-10	0.36661	0.645	0.457	9.02741e-06
Cd47	1.40586e-08	0.366698	0.968	0.949	0.000298507
Ndufa11	3.06865e-08	0.366968	0.897	0.771	0.000651566
Ndufb2	4.19802e-09	0.367143	0.918	0.794	8.91366e-05
Nampt	3.013e-09	0.367226	0.623	0.404	6.3975e-05
Eif1ax	3.00769e-08	0.36731	0.809	0.629	0.000638623
Zfp706	3.3314e-09	0.367393	0.822	0.703	7.07357e-05
Pold4	2.95484e-08	0.367425	0.634	0.497	0.000627402
Vma21	7.61553e-10	0.36753	0.714	0.539	1.617e-05
Ctsd	1.04882e-06	0.367639	0.979	0.931	0.0222696
Ndfip1	1.08308e-08	0.367694	0.981	0.935	0.00022997
Tmem38b	6.4436e-11	0.367766	0.493	0.291	1.36817e-06
Atf4	7.54399e-08	0.367843	0.987	0.952	0.00160181
Rsl24d1	4.63876e-12	0.367932	0.568	0.356	9.84949e-08
Iah1	2.51696e-08	0.367989	0.7	0.568	0.000534426
Tmem109	5.11764e-10	0.368128	0.729	0.571	1.08663e-05
Eif3l	4.38089e-09	0.368128	0.753	0.579	9.30195e-05
Snrnp70	2.615e-10	0.368269	0.91	0.794	5.55242e-06
Agpat4	1.18197e-07	0.368385	0.647	0.514	0.00250967
Wsb2	3.67981e-08	0.368552	0.772	0.568	0.000781334
Nfe2l1	1.44126e-08	0.368663	0.862	0.749	0.000306022
Armh4	1.0484e-06	0.369644	0.257	0.137	0.0222606
Slc41a1	5.13374e-08	0.369705	0.523	0.406	0.00109005
Top1	9.76738e-07	0.369775	0.966	0.895	0.0207391
Ddx54	2.63588e-11	0.369889	0.618	0.429	5.59675e-07
Mpc2	4.04048e-09	0.369911	0.889	0.806	8.57914e-05
Khdrbs3	1.36043e-07	0.369988	0.74	0.562	0.00288861
Thra	5.11955e-10	0.370239	0.814	0.737	1.08703e-05
Arl1	9.07904e-08	0.370277	0.944	0.882	0.00192775
Akt1	2.18392e-09	0.370901	0.812	0.678	4.63712e-05
Ifnar2	6.63544e-09	0.371016	0.883	0.825	0.00014089
Rtraf	1.23317e-07	0.371092	0.915	0.861	0.00261838
Stx11	1.53187e-06	0.37154	0.607	0.419	0.0325263
Strap	3.8817e-09	0.372252	0.886	0.646	8.24201e-05
Tmem242	4.80821e-13	0.372326	0.464	0.242	1.02093e-08
mt-Co3	1.3457e-11	0.372437	0.997	0.996	2.85733e-07
Esf1	9.40955e-08	0.372455	0.647	0.543	0.00199793
Ift27	1.6929e-09	0.372935	0.674	0.516	3.59453e-05
Gde1	2.2076e-10	0.373081	0.645	0.467	4.68739e-06
Magt1	8.31231e-09	0.373878	0.676	0.539	0.000176495
Myd88	3.80605e-09	0.373957	0.663	0.448	8.08139e-05
Eif4a2	6.15085e-11	0.374304	0.95	0.886	1.30601e-06
Tgfb1i1	7.62643e-09	0.374376	0.74	0.531	0.000161932
Nol7	4.10042e-10	0.37439	0.825	0.686	8.70642e-06
Capza2	5.801e-09	0.374423	0.894	0.802	0.000123173
Cox7b	9.66043e-08	0.374468	0.918	0.861	0.0020512
Syncrip	2.42807e-09	0.374524	0.857	0.718	5.15553e-05
Pet100	1.01917e-09	0.37509	0.7	0.491	2.164e-05
Cyc1	1.94328e-09	0.37514	0.737	0.524	4.12617e-05
Napa	2.12467e-10	0.37522	0.812	0.659	4.51131e-06
Olfm1	5.84882e-09	0.375502	0.557	0.394	0.000124188
Lrp1	1.18975e-09	0.375996	0.997	0.994	2.5262e-05
Pole3	1.5838e-12	0.376371	0.549	0.343	3.36289e-08
Ndufa7	2.97979e-09	0.376675	0.95	0.874	6.32698e-05
Psma3	3.11738e-09	0.376952	0.971	0.884	6.61914e-05
Snrpa1	7.67742e-10	0.377005	0.623	0.436	1.63015e-05
Cisd2	5.32221e-09	0.377375	0.841	0.667	0.000113006
Wdr83os	1.79719e-09	0.377617	0.851	0.709	3.81598e-05
Snrpd3	4.4632e-10	0.377757	0.777	0.648	9.47671e-06
Smdt1	1.01706e-07	0.377903	0.942	0.876	0.00215952
Eif4e2	6.2311e-08	0.377974	0.801	0.648	0.00132305
Sar1b	7.61579e-11	0.378217	0.74	0.564	1.61706e-06
Twsg1	3.85891e-09	0.378242	0.785	0.642	8.19362e-05
Ostf1	1.00243e-07	0.378541	0.751	0.68	0.00212845
Gpx4	1.32769e-09	0.378662	0.984	0.968	2.81909e-05
Gar1	5.52661e-10	0.378866	0.536	0.389	1.17346e-05
Ndufa5	1.6748e-10	0.379038	0.87	0.764	3.5561e-06
Rbm7	1.72682e-10	0.379361	0.721	0.564	3.66655e-06
Golt1b	3.44203e-10	0.379545	0.737	0.549	7.30847e-06
Smim10l1	7.5705e-10	0.379812	0.743	0.589	1.60744e-05
Rdx	6.97144e-09	0.379881	0.936	0.842	0.000148025
Tmem59	2.42993e-09	0.380573	0.966	0.924	5.15946e-05
Ssc5d	2.20127e-09	0.380669	0.724	0.589	4.67396e-05
Arcn1	7.31827e-10	0.380917	0.875	0.718	1.55389e-05
Gtf2h5	2.50137e-09	0.381126	0.889	0.724	5.31117e-05
Plekho2	2.48846e-07	0.381151	0.74	0.611	0.00528374
Timm13	3.18338e-08	0.381338	0.851	0.707	0.000675926
Thbs3	8.50596e-07	0.381348	0.759	0.657	0.0180607
Rap1b	1.44181e-08	0.381755	0.971	0.912	0.00030614
Bola3	1.09824e-08	0.382865	0.7	0.545	0.000233189
Psma6	2.78123e-09	0.382919	0.793	0.625	5.90538e-05
Eci2	3.20328e-11	0.383055	0.621	0.455	6.80152e-07
Dda1	1.50267e-11	0.383086	0.668	0.486	3.19062e-07
Anxa7	4.85331e-09	0.383099	0.857	0.728	0.00010305
Cenpx	1.03751e-10	0.383144	0.684	0.507	2.20294e-06
mt-Nd4	1.42538e-12	0.383345	0.997	0.994	3.02652e-08
Bag3	6.45889e-08	0.383396	0.923	0.819	0.00137142
Tmem159	4.01345e-10	0.383486	0.599	0.434	8.52175e-06
Dhrs7	1.76571e-11	0.384426	0.838	0.682	3.74914e-07
Hsd17b10	4.12435e-10	0.384502	0.721	0.577	8.75722e-06
Hmgb2	8.25969e-08	0.38474	0.642	0.562	0.00175378
Hsp90ab1	1.14045e-09	0.385	1	0.996	2.42153e-05
Hmgn5	5.66164e-08	0.385004	0.422	0.286	0.00120214
D8Ertd738e	5.18245e-10	0.38504	0.955	0.838	1.10039e-05
Eif5b	1.1465e-08	0.385124	0.897	0.787	0.000243436
Mmp23	6.13373e-07	0.385325	0.875	0.815	0.0130237
Sumo2	1.82131e-08	0.38541	0.955	0.888	0.000386719
Ndufv2	1.01147e-09	0.385522	0.822	0.659	2.14766e-05
Erh	2.25636e-09	0.385733	0.756	0.598	4.79093e-05
Gas5	7.62854e-08	0.385865	0.992	0.964	0.00161977
Sfpq	1.73727e-09	0.385882	0.931	0.874	3.68874e-05
Ech1	2.99179e-09	0.386235	0.745	0.575	6.35247e-05
Thoc7	1.85771e-09	0.386258	0.83	0.657	3.94448e-05
BC031181	9.54037e-11	0.386347	0.82	0.636	2.02571e-06
Vti1b	1.42153e-09	0.386829	0.727	0.547	3.01834e-05
Timp2	2.53629e-08	0.387266	0.992	0.996	0.000538532
Wdr1	3.92042e-08	0.387302	0.663	0.499	0.000832423
Serinc3	2.80379e-10	0.387394	0.96	0.901	5.95329e-06
Npdc1	8.64666e-08	0.387466	0.939	0.834	0.00183594
Nfkbib	1.82268e-10	0.387529	0.568	0.4	3.8701e-06
Sept7	6.82607e-10	0.387616	0.971	0.924	1.44938e-05
Rsu1	1.00604e-08	0.387747	0.891	0.787	0.000213613
Ap2s1	1.15816e-09	0.387755	0.708	0.558	2.45912e-05
Scamp3	5.56423e-11	0.387953	0.586	0.389	1.18145e-06
Ptges3	1.31482e-10	0.387962	0.936	0.84	2.79176e-06
Pcbp1	2.63302e-09	0.388023	0.92	0.802	5.5907e-05
H2-K1	3.85714e-08	0.388195	0.989	0.964	0.000818986
2610507B11Rik	2.93671e-11	0.388484	0.687	0.514	6.23552e-07
Ppp1r15b	8.75884e-10	0.388977	0.676	0.518	1.85976e-05
Elob	9.64284e-09	0.389025	0.979	0.966	0.000204746
Cd164	5.95011e-11	0.389201	0.833	0.686	1.26339e-06
Dot1l	1.4436e-06	0.389383	0.66	0.467	0.0306519
Dnaja2	5.16567e-07	0.389603	0.886	0.821	0.0109683
Map3k8	1.89281e-08	0.389687	0.573	0.457	0.0004019
Dek	4.13426e-10	0.38973	0.851	0.703	8.77827e-06
Pcbd2	1.59441e-11	0.389877	0.642	0.459	3.3854e-07
Ddrgk1	1.011e-10	0.390231	0.825	0.678	2.14665e-06
Arl6ip5	2.54937e-07	0.390805	0.857	0.716	0.00541308
H2afj	5.30137e-08	0.39081	0.838	0.724	0.00112564
Ptms	4.16493e-09	0.391103	0.992	0.968	8.8434e-05
Ddt	1.74487e-10	0.391146	0.637	0.478	3.70489e-06
0610010K14Rik	1.98816e-10	0.391859	0.533	0.352	4.22145e-06
Capn2	6.26355e-08	0.392029	0.838	0.747	0.00132994
Col4a1	6.95777e-07	0.392055	0.992	0.979	0.0147734
Acadsb	4.08579e-10	0.392193	0.684	0.526	8.67536e-06
Gpx7	2.43563e-07	0.392257	0.796	0.716	0.00517158
Cers2	8.97063e-12	0.392697	0.817	0.617	1.90473e-07
Noct	7.31616e-07	0.393183	0.401	0.234	0.0155344
Nars	8.01133e-08	0.393187	0.859	0.707	0.00170105
Cyba	3.12262e-09	0.393358	0.942	0.874	6.63027e-05
Mafg	7.90969e-09	0.393458	0.796	0.6	0.000167946
Nedd8	3.71066e-10	0.393484	0.947	0.876	7.87885e-06
Fkbp1a	1.03283e-08	0.393667	0.96	0.909	0.0002193
G3bp1	3.67634e-09	0.394202	0.836	0.731	7.80597e-05
Nfkb2	6.1977e-09	0.394368	0.753	0.579	0.000131596
Loxl1	2.76011e-07	0.394536	0.984	0.983	0.00586055
2610001J05Rik	3.37688e-11	0.395109	0.682	0.493	7.17012e-07
Selenok	1.10788e-10	0.395119	0.987	0.979	2.35235e-06
Rbis	1.86536e-09	0.395158	0.867	0.724	3.96071e-05
Mtdh	1.28437e-08	0.395261	0.963	0.857	0.00027271
Mrpl20	1.24217e-10	0.395715	0.833	0.695	2.6375e-06
Fundc2	1.41972e-09	0.395876	0.865	0.775	3.01449e-05
Uba1	8.97294e-10	0.396042	0.761	0.629	1.90522e-05
Sra1	7.08168e-09	0.396382	0.841	0.669	0.000150365
Tma7	3.00125e-09	0.396467	0.95	0.829	6.37256e-05
Psme2	3.37616e-09	0.396632	0.777	0.623	7.16861e-05
Tspo	8.55205e-07	0.396665	0.987	0.928	0.0181586
Ndufb8	2.2959e-09	0.397118	0.889	0.758	4.87489e-05
Impdh2	2.32849e-07	0.397253	0.828	0.745	0.00494408
Gna13	5.02987e-09	0.397261	0.74	0.615	0.000106799
Snhg18	5.64606e-08	0.397493	0.912	0.842	0.00119883
Mdh2	2.90255e-09	0.397735	0.886	0.775	6.16298e-05
Spty2d1	2.38075e-08	0.397831	0.767	0.575	0.000505504
Tmem45a	4.15773e-07	0.397869	0.796	0.678	0.00882811
Ctsz	2.80018e-10	0.398035	0.968	0.949	5.94562e-06
Atp5c1	9.98979e-10	0.398604	0.944	0.874	2.12113e-05
Tmbim1	1.59095e-08	0.398689	0.854	0.747	0.000337806
Snrpb	4.72971e-11	0.398919	0.947	0.874	1.00426e-06
Naxd	1.43057e-10	0.399047	0.745	0.571	3.03754e-06
Mrpl17	4.3168e-09	0.399138	0.721	0.545	9.16586e-05
Mien1	1.6794e-10	0.399452	0.735	0.552	3.56587e-06
Serping1	3.50472e-09	0.399454	0.997	0.996	7.44158e-05
Dnajb9	1.55595e-06	0.399897	0.804	0.749	0.0330375
Riok3	3.43365e-09	0.399938	0.737	0.509	7.29067e-05
Ier3ip1	2.45159e-10	0.400653	0.955	0.836	5.20546e-06
Uqcc2	1.83152e-06	0.400713	0.857	0.777	0.0388886
Dap3	4.12355e-12	0.401057	0.653	0.451	8.75553e-08
Rbm17	5.85256e-12	0.401108	0.679	0.455	1.24267e-07
Slc50a1	1.89479e-09	0.401117	0.857	0.726	4.0232e-05
Srsf2	4.08761e-11	0.40198	0.918	0.846	8.67922e-07
Eif3d	2.16474e-11	0.40218	0.761	0.562	4.59638e-07
Snf8	3.23924e-11	0.402405	0.695	0.549	6.87787e-07
Atp6v1g1	5.14416e-10	0.402503	0.897	0.789	1.09226e-05
Gdi2	5.52775e-09	0.40252	0.944	0.897	0.000117371
Pros1	4.47335e-10	0.402645	0.788	0.669	9.49826e-06
Map1lc3b	5.21604e-10	0.402782	0.981	0.949	1.10752e-05
Sf3b6	2.90119e-10	0.402877	0.851	0.695	6.1601e-06
Hmgn2	1.22077e-08	0.403326	0.594	0.4	0.000259205
Nedd4	6.75092e-10	0.403384	0.992	0.975	1.43342e-05
Cct4	6.87215e-10	0.403508	0.846	0.749	1.45916e-05
Nolc1	3.0818e-08	0.403955	0.674	0.539	0.000654358
Sgcb	9.57017e-12	0.403968	0.735	0.577	2.03203e-07
Snhg4	1.61488e-11	0.404066	0.477	0.257	3.42887e-07
Atp6v0c	2.69236e-09	0.404718	0.981	0.918	5.71669e-05
Erp29	6.30465e-08	0.405034	0.934	0.811	0.00133867
Dpm3	6.58922e-11	0.405431	0.912	0.842	1.39909e-06
Park7	9.19117e-11	0.405453	0.912	0.842	1.95156e-06
Hipk1	4.19885e-11	0.40555	0.753	0.545	8.91541e-07
Erp44	6.80461e-11	0.405702	0.873	0.722	1.44482e-06
Wnt11	5.86866e-09	0.40598	0.438	0.257	0.000124609
Hint1	6.4083e-10	0.406248	0.987	0.926	1.36068e-05
Gnas	5.83329e-11	0.406515	1	1	1.23858e-06
Spcs1	2.64394e-10	0.407322	0.926	0.834	5.61388e-06
Matr3	3.33683e-12	0.407364	0.806	0.663	7.08509e-08
Irak1	4.94694e-11	0.407641	0.772	0.602	1.05038e-06
Birc2	2.55828e-09	0.407755	0.507	0.347	5.432e-05
Bmp1	6.72044e-07	0.407758	0.905	0.838	0.0142695
Grcc10	1.17e-10	0.407793	0.926	0.789	2.48425e-06
H2-Q4	2.21603e-06	0.407893	0.708	0.589	0.047053
Pim3	5.07917e-09	0.408002	0.541	0.406	0.000107846
Ilf2	3.82829e-12	0.408098	0.711	0.507	8.12861e-08
Trmt112	1.89769e-11	0.408104	0.788	0.648	4.02937e-07
Srsf3	5.04714e-10	0.408315	0.915	0.811	1.07166e-05
Chic2	7.12959e-11	0.408452	0.92	0.825	1.51383e-06
Ctsa	8.63748e-11	0.408901	0.825	0.657	1.834e-06
Atp2a2	4.58091e-09	0.409112	0.92	0.821	9.72665e-05
Gm2000	3.90248e-11	0.409512	0.568	0.347	8.28614e-07
Cope	1.14588e-08	0.409677	0.902	0.733	0.000243304
Map1lc3a	2.05665e-09	0.410019	0.939	0.861	4.36688e-05
Ubl5	3.02168e-10	0.410669	0.958	0.869	6.41593e-06
Tma16	5.31815e-10	0.411165	0.573	0.352	1.1292e-05
Ldhb	1.40651e-13	0.411238	0.401	0.202	2.98645e-09
Cct6a	8.44541e-10	0.411247	0.822	0.661	1.79321e-05
Pf4	1.15524e-06	0.411719	0.268	0.263	0.0245291
Samd4b	2.35402e-10	0.411724	0.836	0.697	4.99828e-06
Phb2	1.13636e-10	0.411745	0.828	0.659	2.41283e-06
Mmp19	4.21737e-08	0.41202	0.432	0.267	0.000895473
Ecm2	1.53088e-08	0.412065	0.785	0.684	0.000325052
Tmem107	1.89403e-11	0.412326	0.515	0.347	4.02159e-07
Lrrc59	2.65169e-09	0.412876	0.833	0.686	5.63033e-05
Gm16286	2.44117e-12	0.41361	0.79	0.606	5.18333e-08
1110038B12Rik	9.86991e-09	0.414085	0.711	0.556	0.000209568
Pa2g4	1.02481e-12	0.414363	0.793	0.573	2.17597e-08
Ppia	1.14843e-09	0.414534	0.997	0.998	2.43846e-05
Arid5a	5.06812e-09	0.414876	0.634	0.512	0.000107611
Sf1	6.8316e-12	0.415321	0.817	0.644	1.45055e-07
Tagln2	3.03232e-07	0.415368	0.981	0.943	0.00643854
Cfh	2.43813e-08	0.41562	1	0.989	0.000517689
Aprt	2.90371e-09	0.41568	0.727	0.621	6.16544e-05
Ftl1	5.64678e-07	0.416039	1	0.998	0.0119898
Poglut3	5.74487e-10	0.416078	0.682	0.522	1.21981e-05
Arf6	7.67844e-11	0.416093	0.692	0.499	1.63036e-06
Mphosph10	2.3624e-10	0.416445	0.584	0.356	5.01608e-06
Use1	7.53594e-11	0.416473	0.894	0.762	1.60011e-06
Cct7	6.81281e-11	0.416576	0.87	0.705	1.44656e-06
Cox5a	3.2892e-09	0.417195	0.905	0.808	6.98395e-05
Sntb2	2.4006e-08	0.417632	0.944	0.903	0.00050972
Atp5j	7.43173e-11	0.417985	0.981	0.918	1.57798e-06
March5	1.32792e-10	0.418091	0.753	0.604	2.81957e-06
Snhg1	7.74106e-08	0.418252	0.796	0.644	0.00164366
Tbca	8.43908e-11	0.418294	0.939	0.848	1.79187e-06
Slc25a4	6.42149e-09	0.418301	0.973	0.939	0.000136348
Atp6v1f	3.51961e-10	0.41835	0.899	0.781	7.4732e-06
Cct8	3.42658e-10	0.418423	0.851	0.752	7.27566e-06
Fxyd1	2.36067e-12	0.419397	0.963	0.931	5.0124e-08
Bzw1	3.40281e-09	0.41953	0.915	0.811	7.22518e-05
Aimp1	4.42181e-11	0.419559	0.79	0.602	9.38883e-07
Hmgn1	1.57039e-09	0.419778	0.966	0.876	3.33441e-05
mt-Co2	2.91874e-14	0.420053	1	0.996	6.19737e-10
Iscu	2.6998e-12	0.420267	0.793	0.657	5.73248e-08
Ybx3	1.80415e-10	0.420557	0.987	0.935	3.83074e-06
Twf1	6.92556e-10	0.420566	0.706	0.541	1.4705e-05
Abracl	1.64623e-08	0.420826	0.759	0.621	0.000349545
Chpt1	2.71322e-12	0.42165	0.65	0.457	5.76097e-08
Psmb1	2.0722e-10	0.421915	0.952	0.863	4.39991e-06
Sde2	5.07054e-13	0.422497	0.703	0.516	1.07663e-08
Fam104a	1.35045e-11	0.42273	0.825	0.669	2.8674e-07
Actr2	1.36399e-11	0.423363	0.812	0.621	2.89616e-07
Eif3j1	2.17536e-10	0.423561	0.836	0.728	4.61894e-06
Slc38a2	6.59841e-08	0.423723	0.918	0.844	0.00140104
Srsf10	6.76492e-13	0.423875	0.793	0.659	1.43639e-08
Slc1a5	2.34833e-11	0.423957	0.918	0.789	4.98621e-07
Reep5	3.37649e-09	0.424006	0.939	0.863	7.1693e-05
Ndufb9	4.46295e-12	0.424377	0.942	0.865	9.47618e-08
Maged1	3.86885e-09	0.42456	0.918	0.796	8.21472e-05
Pdgfra	1.23991e-08	0.424924	0.926	0.899	0.00026327
Ganab	3.28006e-13	0.425435	0.767	0.573	6.96455e-09
Atp5d	8.49039e-11	0.425722	0.971	0.899	1.80276e-06
Ndufb5	1.90468e-10	0.425797	0.905	0.783	4.0442e-06
Cd14	1.36465e-06	0.425809	0.149	0.097	0.0289757
Tmem14c	1.39204e-09	0.426401	0.812	0.684	2.95571e-05
Ndufc1	3.5913e-10	0.426415	0.865	0.781	7.62541e-06
Abce1	1.39896e-11	0.426769	0.698	0.512	2.97041e-07
Snrpd1	1.38988e-11	0.42697	0.857	0.695	2.95113e-07
Ccrl2	1.28101e-06	0.427077	0.411	0.293	0.0271997
Csde1	1.27885e-11	0.427101	0.955	0.886	2.71538e-07
Mxra8	9.28176e-11	0.427702	0.979	0.947	1.9708e-06
Tpm3	1.01207e-12	0.42797	0.992	0.971	2.14892e-08
Cr1l	1.29588e-12	0.428091	0.782	0.577	2.75155e-08
Tm9sf1	3.19512e-13	0.42841	0.687	0.474	6.78421e-09
Medag	2.09937e-07	0.428605	0.944	0.912	0.0044576
Tomm5	2.58084e-11	0.428753	0.83	0.657	5.47989e-07
Tcp1	7.92634e-11	0.428928	0.875	0.747	1.683e-06
Fkbp2	1.11448e-11	0.429817	0.92	0.777	2.36638e-07
Ppp1cc	9.08999e-12	0.42985	0.836	0.661	1.93008e-07
Uqcr11	6.34238e-11	0.430052	0.942	0.859	1.34668e-06
Cnpy2	1.86098e-10	0.430548	0.902	0.806	3.95142e-06
Glipr2	6.053e-08	0.430561	0.615	0.478	0.00128523
Fubp1	3.60841e-11	0.431154	0.828	0.678	7.66173e-07
Alyref	3.641e-13	0.43116	0.74	0.556	7.73093e-09
Cyp1b1	1.8992e-06	0.431268	0.459	0.362	0.0403256
Nras	1.32531e-11	0.431277	0.796	0.585	2.81403e-07
Eif3b	3.38516e-12	0.431576	0.812	0.669	7.18771e-08
Sec61a1	3.81536e-10	0.431604	0.899	0.766	8.10115e-06
Zfp36l1	1.12065e-06	0.4317	0.942	0.941	0.0237947
Pttg1ip	1.03663e-10	0.432478	0.92	0.842	2.20108e-06
Ube2l3	2.5939e-11	0.43297	0.859	0.728	5.50763e-07
Tmsb10	3.01502e-08	0.433267	1	1	0.000640179
Serp1	6.88676e-10	0.433354	0.87	0.754	1.46227e-05
Ifi27	5.28312e-10	0.433765	0.915	0.838	1.12177e-05
Sem1	2.08044e-11	0.433855	0.989	0.964	4.41739e-07
Adamts2	8.87761e-08	0.433928	0.979	0.945	0.00188498
Tmem234	7.84955e-12	0.433937	0.878	0.773	1.66669e-07
Eif3m	9.11436e-12	0.435267	0.875	0.726	1.93525e-07
Vegfa	8.04588e-08	0.435347	0.607	0.469	0.00170838
Txndc17	3.29773e-10	0.435575	0.918	0.832	7.00206e-06
Map4k4	7.38589e-08	0.435705	0.905	0.823	0.00156825
Lman2	4.25114e-11	0.435725	0.833	0.655	9.02646e-07
Anapc5	1.90601e-12	0.435915	0.915	0.815	4.04702e-08
Mrpl30	2.60468e-11	0.43615	0.851	0.697	5.53051e-07
Dad1	3.25973e-10	0.436169	0.976	0.924	6.92139e-06
Cmtm7	3.25137e-10	0.436403	0.671	0.503	6.90363e-06
Ndufa10	7.59998e-12	0.436656	0.767	0.554	1.6137e-07
Slc38a10	2.40377e-10	0.436674	0.788	0.648	5.10392e-06
Spcs3	1.06004e-12	0.436687	0.706	0.48	2.25079e-08
Prkcsh	1.26315e-11	0.436947	0.793	0.646	2.68204e-07
Emilin1	3.98898e-08	0.438112	0.926	0.878	0.000846981
Tmco1	2.09288e-13	0.438292	0.875	0.722	4.44381e-09
Arf5	1.86008e-10	0.438302	0.979	0.943	3.94951e-06
Gnb2	2.68939e-11	0.438432	0.968	0.924	5.71038e-07
Uqcrfs1	2.27444e-12	0.438756	0.796	0.571	4.82932e-08
Micos13	1.92886e-11	0.439436	0.889	0.76	4.09555e-07
Ogn	7.53546e-07	0.440054	0.942	0.912	0.016
Calm3	9.62143e-10	0.440139	0.828	0.771	2.04292e-05
Morf4l1	1.31228e-13	0.440198	0.995	0.96	2.78636e-09
Slc35e4	1.06595e-11	0.440417	0.565	0.347	2.26332e-07
Bcl7c	3.96531e-12	0.440482	0.883	0.783	8.41954e-08
Sec13	1.21397e-11	0.440653	0.801	0.629	2.57763e-07
Emc10	3.07954e-14	0.44078	0.902	0.792	6.53878e-10
Manf	1.19883e-07	0.440831	0.973	0.903	0.00254547
Prr13	3.02524e-07	0.440838	0.846	0.712	0.00642348
Dnajb11	4.95803e-11	0.441675	0.867	0.758	1.05274e-06
Hnrnpdl	4.2298e-13	0.442004	0.897	0.779	8.98113e-09
Eif1a	1.26201e-09	0.442118	0.926	0.8	2.67962e-05
Anp32b	5.28819e-11	0.442228	0.942	0.834	1.12284e-06
Eif4b	9.77068e-12	0.44244	0.859	0.728	2.07461e-07
Lsm4	4.42552e-11	0.442929	0.804	0.672	9.39671e-07
Uqcrh	2.10603e-11	0.444065	0.992	0.956	4.47173e-07
Polr2f	1.44073e-13	0.444138	0.87	0.722	3.0591e-09
Vapa	1.27376e-11	0.444214	0.907	0.838	2.70458e-07
Fbl	4.08284e-11	0.444752	0.796	0.682	8.6691e-07
Npc2	2.24897e-09	0.446115	0.984	0.914	4.77523e-05
Grn	1.0493e-09	0.446665	0.942	0.863	2.22798e-05
Akr1a1	1.36421e-10	0.446709	0.95	0.909	2.89663e-06
Wdr43	3.6829e-09	0.447264	0.676	0.493	7.8199e-05
Gpx1	4.31876e-08	0.447286	0.958	0.884	0.000917002
Ndufc2	1.80988e-11	0.447297	0.915	0.789	3.84292e-07
mt-Nd5	2.74964e-12	0.447397	0.989	0.973	5.8383e-08
Glrx3	4.0393e-12	0.447523	0.889	0.739	8.57665e-08
Gstm1	1.44988e-10	0.447667	0.976	0.935	3.07854e-06
Fis1	2.28716e-12	0.447714	0.878	0.771	4.85633e-08
Ndufv3	1.67538e-10	0.448287	0.878	0.773	3.55733e-06
Tmed9	1.55276e-10	0.44839	0.966	0.901	3.29697e-06
Il4ra	1.61197e-09	0.44844	0.599	0.385	3.42269e-05
Os9	4.83065e-14	0.448489	0.849	0.718	1.02569e-09
Gpi1	3.94269e-11	0.448907	0.907	0.8	8.37152e-07
Tgoln1	3.2665e-13	0.449312	0.867	0.762	6.93576e-09
Rhoa	1.62202e-10	0.450428	0.989	0.958	3.44405e-06
Ubb	9.78154e-12	0.45046	1	0.998	2.07691e-07
Timm17a	4.12521e-15	0.45072	0.782	0.539	8.75906e-11
Atp5a1	5.45142e-13	0.450748	0.963	0.897	1.1575e-08
Psmd8	1.74545e-10	0.451054	0.92	0.798	3.70611e-06
Calm1	2.89627e-09	0.451087	0.989	0.971	6.14965e-05
Txn2	2.68461e-12	0.451529	0.759	0.581	5.70022e-08
Mrto4	2.75681e-13	0.451712	0.613	0.406	5.85353e-09
Emp3	1.87425e-08	0.4518	0.979	0.949	0.00039796
Gpr153	4.73866e-10	0.451951	0.822	0.691	1.00616e-05
Metap2	8.87935e-13	0.451957	0.889	0.773	1.88535e-08
2410006H16Rik	9.82999e-09	0.451976	0.936	0.851	0.00020872
Tmem256	2.05931e-11	0.452203	0.931	0.792	4.37254e-07
Scd1	1.63011e-08	0.452427	0.764	0.623	0.000346122
Atp5f1	3.21052e-11	0.452787	0.947	0.855	6.8169e-07
Snrpe	1.63767e-12	0.452981	0.926	0.855	3.47727e-08
Ap2m1	9.25018e-13	0.453055	0.923	0.815	1.96409e-08
Cyb561	2.82738e-12	0.453084	0.538	0.309	6.00338e-08
Fcgrt	9.43312e-13	0.453232	0.936	0.874	2.00293e-08
Edf1	9.94143e-11	0.454353	0.923	0.838	2.11086e-06
Dctn3	2.55865e-09	0.454491	0.798	0.646	5.43277e-05
Nmb	9.09572e-13	0.454499	0.3	0.099	1.93129e-08
Malat1	9.42773e-13	0.454766	0.997	0.998	2.00179e-08
Ang	7.23232e-15	0.454871	0.666	0.465	1.53564e-10
Ybx1	2.51254e-10	0.455043	0.995	0.975	5.33487e-06
Dcun1d5	5.15355e-13	0.455879	0.796	0.6	1.09425e-08
1810037I17Rik	9.42559e-13	0.456051	0.907	0.773	2.00134e-08
Drap1	1.95033e-12	0.456175	0.944	0.848	4.14113e-08
Emd	5.49512e-11	0.456673	0.748	0.531	1.16678e-06
Rabac1	1.77456e-16	0.456776	0.995	0.945	3.76792e-12
Srsf7	4.97386e-11	0.457138	0.875	0.749	1.0561e-06
Srpx2	5.41787e-08	0.457252	0.796	0.705	0.00115038
Ufc1	7.24205e-12	0.457425	0.881	0.718	1.53771e-07
Gusb	5.9249e-14	0.457723	0.671	0.457	1.25803e-09
Bola2	2.116e-14	0.457926	0.875	0.731	4.4929e-10
Eif2s2	1.09465e-09	0.458036	0.966	0.905	2.32427e-05
Wdfy1	6.58524e-13	0.458059	0.57	0.309	1.39824e-08
Hacd1	1.29252e-12	0.458391	0.538	0.331	2.7444e-08
Ebna1bp2	2.00679e-13	0.458485	0.698	0.507	4.26103e-09
Sh3gl1	1.90451e-12	0.458643	0.719	0.547	4.04384e-08
Hnrnpab	6.9658e-14	0.458765	0.96	0.846	1.47905e-09
Gba	1.39289e-14	0.458894	0.515	0.303	2.95752e-10
Eif3k	3.45208e-13	0.458945	0.968	0.891	7.3298e-09
Hexa	8.78816e-12	0.458969	0.899	0.783	1.86599e-07
Pofut2	1.70894e-13	0.459514	0.881	0.741	3.6286e-09
Nap1l1	9.8516e-14	0.45957	0.958	0.878	2.09179e-09
Anxa2	5.1588e-07	0.459908	0.987	0.966	0.0109537
Surf4	2.79351e-10	0.459982	0.883	0.783	5.93145e-06
Serinc1	4.42858e-14	0.460189	0.955	0.861	9.40321e-10
Swi5	1.13177e-11	0.460231	0.958	0.901	2.40309e-07
Tnfrsf1a	1.54344e-13	0.460742	0.894	0.817	3.2772e-09
Prelid1	1.99487e-11	0.460774	0.841	0.697	4.2357e-07
Fas	3.34439e-09	0.460853	0.623	0.469	7.10114e-05
Rer1	7.07761e-12	0.461185	0.931	0.825	1.50279e-07
Ggh	2.3962e-13	0.461347	0.777	0.684	5.08785e-09
Mydgf	1.5891e-11	0.46144	0.862	0.724	3.37414e-07
Selenom	1.61396e-11	0.462128	0.992	0.943	3.42692e-07
Psme1	1.88476e-11	0.462358	0.775	0.629	4.00192e-07
Bri3	1.98536e-10	0.46263	0.968	0.876	4.21551e-06
Myl12a	1.93173e-11	0.462683	0.981	0.96	4.10165e-07
Isg20	4.84405e-13	0.462884	0.544	0.284	1.02854e-08
Atp5g3	4.90203e-13	0.463111	0.907	0.796	1.04085e-08
Slc3a2	3.79716e-08	0.463705	0.928	0.872	0.000806251
Snrpd2	1.29722e-13	0.464503	0.934	0.842	2.75438e-09
Rhoc	2.13271e-09	0.464682	0.973	0.912	4.52838e-05
C1qbp	1.01188e-13	0.46557	0.775	0.625	2.14853e-09
Cox7a2	2.98773e-13	0.465661	0.968	0.893	6.34384e-09
mt-Atp8	6.07038e-12	0.465923	0.894	0.804	1.28892e-07
Colgalt1	1.03777e-10	0.466692	0.836	0.693	2.20351e-06
Atp5b	1.14224e-12	0.466766	0.976	0.947	2.42532e-08
Psmb4	3.3477e-13	0.466811	0.944	0.88	7.10817e-09
Fbln1	1.08915e-07	0.466943	0.987	0.962	0.0023126
Tbrg1	6.15564e-11	0.467375	0.934	0.829	1.30703e-06
Atp5j2	1.29907e-11	0.467506	0.966	0.922	2.75831e-07
Tm9sf3	9.93938e-14	0.467822	0.95	0.872	2.11043e-09
Lmo4	1.06785e-09	0.467946	0.912	0.813	2.26737e-05
Ptma	3.78559e-14	0.468295	1	0.998	8.03795e-10
Tgfbr2	4.09363e-10	0.468318	0.897	0.869	8.69201e-06
Golph3	6.41473e-10	0.469203	0.862	0.714	1.36204e-05
Ppp2ca	4.67463e-12	0.470684	0.95	0.859	9.92564e-08
Bcl3	3.38072e-11	0.471431	0.462	0.288	7.17827e-07
Selenon	5.6444e-13	0.471512	0.748	0.571	1.19848e-08
Srsf6	1.36507e-14	0.471515	0.849	0.688	2.89845e-10
Mrpl23	7.39846e-15	0.471649	0.841	0.674	1.57092e-10
Tgif1	2.49161e-08	0.471649	0.698	0.552	0.000529043
Pnrc1	1.31806e-12	0.471974	0.976	0.952	2.79864e-08
Tram1	2.66911e-12	0.472183	0.907	0.815	5.66732e-08
Tmsb4x	1.43385e-09	0.472218	1	0.998	3.0445e-05
Gng5	1.94004e-11	0.472293	0.984	0.945	4.11928e-07
Cycs	3.97503e-12	0.472472	0.82	0.68	8.44018e-08
Yipf5	1.95821e-12	0.473377	0.875	0.672	4.15787e-08
Mybbp1a	3.60791e-14	0.473507	0.65	0.423	7.66068e-10
Sec61b	3.11621e-09	0.473569	0.963	0.876	6.61665e-05
Ssr2	1.6708e-10	0.474226	0.918	0.815	3.5476e-06
Lamp1	3.7722e-14	0.474674	0.984	0.975	8.00951e-10
Aga	1.44978e-14	0.474871	0.711	0.501	3.07832e-10
Spred1	1.90166e-09	0.474959	0.793	0.634	4.03779e-05
Hnrnpk	1.80404e-15	0.475317	0.973	0.937	3.83052e-11
Rhou	2.46155e-10	0.475433	0.634	0.442	5.2266e-06
Sav1	4.62381e-13	0.476321	0.78	0.537	9.81774e-09
Crispld2	1.90593e-09	0.476676	0.944	0.943	4.04686e-05
Gtpbp4	1.03211e-10	0.476727	0.708	0.512	2.19148e-06
Rab18	4.40755e-15	0.477464	0.881	0.779	9.35855e-11
Selenos	2.87322e-13	0.477721	0.966	0.857	6.10071e-09
Dbi	4.73874e-07	0.478029	0.966	0.918	0.0100618
Oat	3.73916e-14	0.478855	0.944	0.865	7.93935e-10
Gabarapl2	1.06702e-15	0.479101	0.907	0.779	2.26561e-11
Atp5md	9.68038e-13	0.479584	0.926	0.804	2.05543e-08
Cct3	2.95223e-13	0.479671	0.886	0.726	6.26846e-09
Nme1	2.26343e-11	0.48109	0.844	0.724	4.80595e-07
Stk25	8.80517e-17	0.482419	0.618	0.383	1.8696e-12
Tnfaip3	3.9804e-07	0.482454	0.438	0.246	0.00845158
Tomm7	5.35724e-14	0.482517	0.968	0.897	1.1375e-09
Acp1	3.44113e-15	0.482824	0.708	0.467	7.30655e-11
Ncl	1.82157e-11	0.48328	0.987	0.949	3.86775e-07
Skil	5.91506e-11	0.483508	0.854	0.758	1.25595e-06
AI506816	1.6857e-10	0.483606	0.7	0.495	3.57924e-06
Mtch1	7.56841e-11	0.48374	0.984	0.96	1.607e-06
Rnh1	3.12324e-12	0.483746	0.958	0.838	6.63157e-08
Snu13	1.29338e-13	0.48416	0.939	0.84	2.74624e-09
Zfand5	8.20251e-11	0.485149	0.958	0.897	1.74164e-06
Tra2b	9.49465e-16	0.485222	0.944	0.878	2.016e-11
Hnrnpa0	3.34062e-15	0.486371	0.979	0.905	7.09313e-11
Ssbp4	5.18354e-14	0.487295	0.711	0.486	1.10062e-09
Arpc1a	2.04933e-15	0.487367	0.857	0.703	4.35134e-11
Ace	5.75431e-12	0.487781	0.947	0.897	1.22181e-07
Clptm1l	1.3495e-14	0.488018	0.801	0.627	2.86538e-10
Timm8a1	9.37389e-13	0.488086	0.475	0.309	1.99036e-08
Arrdc3	1.65742e-06	0.488128	0.607	0.488	0.0351919
Polr1d	1.69252e-12	0.488467	0.912	0.819	3.59373e-08
Pfdn5	8.67744e-17	0.488714	0.989	0.958	1.84248e-12
Maged2	7.27973e-08	0.489682	0.804	0.686	0.0015457
Fkbp7	1.01225e-14	0.48971	0.939	0.794	2.14932e-10
Hsp90aa1	1.36081e-13	0.489737	0.997	0.958	2.88941e-09
Sec11a	5.92385e-15	0.489859	0.92	0.798	1.25781e-10
Fhl1	1.11013e-08	0.490153	0.859	0.771	0.000235714
Rps27rt	6.15314e-19	0.49031	0.57	0.303	1.3065e-14
Gprc5b	1.08403e-13	0.49039	0.589	0.394	2.30172e-09
Arf1	1.13516e-13	0.490476	0.966	0.905	2.41028e-09
Ggt5	1.2908e-08	0.491102	0.414	0.322	0.000274076
Mrfap1	7.53657e-15	0.491347	0.971	0.916	1.60024e-10
Kdelr1	4.72452e-12	0.49177	0.923	0.838	1.00316e-07
Col6a3	1.11938e-07	0.492232	0.923	0.92	0.00237677
Ehd1	2.02268e-11	0.493114	0.772	0.642	4.29476e-07
Cavin1	2.05964e-12	0.493367	0.928	0.829	4.37324e-08
H3f3a	4.39848e-14	0.493514	0.995	0.983	9.33929e-10
Hypk	3.62405e-16	0.493634	0.655	0.419	7.69494e-12
mt-Atp6	4.95725e-19	0.49403	0.997	0.998	1.05257e-14
Ostc	2.14853e-10	0.494502	0.939	0.817	4.56196e-06
Ddx5	1.5977e-17	0.494673	1	0.992	3.39239e-13
Ost4	4.65795e-11	0.495369	0.966	0.899	9.89022e-07
Myl6	1.29693e-11	0.495569	0.995	0.987	2.75378e-07
Myadm	2.70825e-11	0.495655	0.936	0.92	5.75042e-07
Pqlc1	1.41146e-07	0.496004	0.642	0.472	0.00299696
Mfge8	1.02355e-13	0.496263	0.928	0.821	2.17331e-09
Higd1a	2.45806e-10	0.49638	0.862	0.739	5.21921e-06
Gnai2	3.17344e-14	0.497285	0.979	0.947	6.73817e-10
Rsl1d1	2.21321e-12	0.497339	0.772	0.573	4.69931e-08
Itm2a	1.01349e-08	0.497615	0.809	0.707	0.000215193
Smim7	3.93189e-15	0.497671	0.889	0.735	8.34859e-11
Nsg1	4.64585e-15	0.498648	0.549	0.286	9.86453e-11
Atp6v0e	1.94425e-13	0.498721	0.918	0.811	4.12822e-09
Il1r2	1.53668e-13	0.499079	0.239	0.105	3.26284e-09
Capns1	5.99899e-13	0.499986	0.955	0.918	1.27376e-08
Ets2	2.12522e-10	0.500134	0.602	0.406	4.51247e-06
Foxc1	8.76101e-10	0.500591	0.631	0.461	1.86023e-05
Ywhaz	6.36895e-16	0.50067	0.981	0.895	1.35232e-11
Fermt2	2.20769e-13	0.500936	0.939	0.897	4.6876e-09
Spry2	1.03675e-08	0.501012	0.7	0.509	0.000220134
Ctsl	7.15428e-14	0.501132	0.992	0.994	1.51907e-09
Ndufa13	1.47172e-15	0.501329	0.984	0.914	3.1249e-11
Ctsh	3.47336e-09	0.501901	0.663	0.516	7.37499e-05
Ranbp1	5.58987e-14	0.501956	0.889	0.771	1.1869e-09
Smim3	4.78232e-11	0.502045	0.56	0.318	1.01543e-06
Cstb	2.678e-08	0.502122	0.883	0.766	0.000568619
Rheb	2.11637e-11	0.503077	0.942	0.84	4.49369e-07
Degs1	5.48118e-16	0.503178	0.889	0.777	1.16382e-11
Podn	8.35644e-10	0.503288	0.629	0.505	1.77432e-05
Ndufa4	2.22839e-12	0.503652	0.973	0.884	4.73153e-08
Eif3a	1.50932e-13	0.50466	0.952	0.907	3.20475e-09
Cct5	3.12866e-15	0.504661	0.899	0.802	6.64308e-11
Rrs1	5.75435e-15	0.505591	0.602	0.402	1.22182e-10
Dnajb4	1.10386e-12	0.505979	0.841	0.707	2.34383e-08
Psap	6.14912e-18	0.506422	0.989	0.966	1.30564e-13
Canx	1.15558e-13	0.507035	0.947	0.886	2.45364e-09
Il6st	1.89463e-16	0.507347	0.968	0.907	4.02287e-12
Tmem123	3.00696e-15	0.507752	0.764	0.554	6.38468e-11
Lamc1	9.85933e-10	0.507823	0.979	0.981	2.09343e-05
Rpn1	1.20931e-13	0.508143	0.944	0.804	2.56772e-09
Csf1	6.89617e-11	0.508184	0.767	0.674	1.46426e-06
Ddx3x	6.94277e-17	0.50845	0.966	0.882	1.47416e-12
P3h3	4.16284e-14	0.508523	0.91	0.806	8.83896e-10
Rnasek	1.45102e-15	0.508573	0.939	0.859	3.08094e-11
Igsf8	1.75153e-14	0.509213	0.822	0.575	3.71902e-10
Taf10	3.9792e-13	0.509938	0.883	0.724	8.44904e-09
Nid2	1.01931e-12	0.510537	0.528	0.373	2.16431e-08
Cox17	4.99197e-14	0.510728	0.79	0.621	1.05994e-09
Lrrc8a	1.13408e-14	0.511195	0.711	0.537	2.408e-10
Serbp1	7.54243e-15	0.511256	0.963	0.931	1.60148e-10
Shisa5	2.42025e-12	0.513287	0.942	0.817	5.13892e-08
Prdx5	6.07717e-11	0.514071	0.912	0.802	1.29037e-06
Sfr1	3.96348e-14	0.514391	0.958	0.928	8.41565e-10
Vamp7	4.35605e-18	0.514845	0.623	0.392	9.2492e-14
Rab20	5.01516e-13	0.514918	0.363	0.177	1.06487e-08
Tpbg	2.01439e-12	0.515261	0.419	0.213	4.27714e-08
Tm2d2	4.22772e-13	0.517819	0.912	0.817	8.97671e-09
Ndufb11	8.55199e-18	0.518919	0.96	0.891	1.81584e-13
Gm42679	2.09521e-06	0.519655	0.584	0.398	0.0444876
Ndufa6	5.98798e-17	0.520043	0.918	0.8	1.27143e-12
Spry1	1.61536e-08	0.520366	0.703	0.644	0.00034299
Clec3b	1.36223e-06	0.520596	0.897	0.905	0.0289243
Fosl1	2.01545e-08	0.520642	0.438	0.204	0.000427939
Fem1b	1.11287e-06	0.521113	0.623	0.482	0.0236296
Aebp1	3.15129e-11	0.521727	0.952	0.857	6.69114e-07
Txndc5	6.54216e-13	0.522236	0.952	0.853	1.3891e-08
S100a6	2.99385e-11	0.522918	1	1	6.35685e-07
Sar1a	4.47575e-16	0.523071	0.963	0.876	9.50336e-12
Nenf	3.00021e-16	0.523599	0.979	0.947	6.37034e-12
Cox8a	3.77801e-16	0.523961	0.981	0.96	8.02185e-12
Slc25a3	9.90984e-15	0.524031	0.984	0.935	2.10416e-10
Lama4	5.24588e-10	0.524052	0.907	0.865	1.11386e-05
Xbp1	3.44724e-16	0.524126	0.915	0.811	7.31952e-12
Cox7c	1.78084e-15	0.525117	0.997	0.952	3.78125e-11
Eif6	3.72332e-14	0.525153	0.844	0.686	7.90573e-10
Stt3a	5.63209e-15	0.525759	0.889	0.741	1.19586e-10
Mrpl52	5.0983e-16	0.526771	0.968	0.899	1.08252e-11
Hnrnpa3	4.87354e-18	0.526901	0.966	0.939	1.0348e-13
Arpc5	1.03148e-15	0.527082	0.902	0.728	2.19015e-11
Alpl	3.11727e-09	0.527208	0.477	0.269	6.6189e-05
Eif3h	3.24506e-16	0.527659	0.976	0.928	6.89024e-12
Gstm5	5.62832e-12	0.527887	0.782	0.667	1.19506e-07
Ywhab	7.25065e-16	0.529077	0.955	0.846	1.53953e-11
Cct2	9.38503e-17	0.530495	0.931	0.792	1.99272e-12
Pkm	8.76711e-12	0.530563	0.942	0.857	1.86152e-07
Sphk1	1.00704e-14	0.531602	0.573	0.339	2.13825e-10
Serpinb6a	7.34261e-10	0.53186	0.973	0.945	1.55906e-05
Xdh	1.44194e-10	0.532434	0.796	0.659	3.06167e-06
Snrpg	3.56585e-16	0.532454	0.973	0.884	7.57137e-12
Ddx21	5.38463e-12	0.532943	0.828	0.672	1.14332e-07
Hnrnpu	1.42617e-17	0.533016	0.947	0.874	3.02819e-13
Atp1a2	1.40926e-11	0.533204	0.769	0.691	2.99228e-07
Lamp2	1.30625e-18	0.533728	0.995	0.952	2.77356e-14
Hspa8	5.80895e-14	0.534424	0.997	0.989	1.23341e-09
Trib1	3.54449e-10	0.534631	0.83	0.661	7.52601e-06
Morf4l2	9.75838e-17	0.534738	0.942	0.903	2.072e-12
Ssr1	1.56094e-16	0.535121	0.915	0.779	3.31434e-12
Flna	4.15245e-13	0.536154	0.915	0.8	8.8169e-09
Gstm2	2.50555e-12	0.539751	0.798	0.741	5.32003e-08
Cox6b1	1.14201e-15	0.539986	0.973	0.914	2.42483e-11
Bach1	4.4535e-12	0.541626	0.764	0.56	9.45613e-08
Rarres2	2.51308e-16	0.54195	0.981	0.964	5.33603e-12
Slc39a1	6.22365e-15	0.542496	0.828	0.672	1.32147e-10
S100a10	4.20045e-09	0.543096	0.979	0.977	8.91881e-05
Cox4i1	1.37543e-18	0.544315	0.992	0.973	2.92044e-14
Gnl3	9.45492e-12	0.544487	0.878	0.716	2.00756e-07
Gbp2	5.04824e-07	0.544727	0.531	0.36	0.0107189
Crtap	1.47236e-15	0.545096	0.812	0.651	3.12626e-11
Hspa5	1.42355e-11	0.545663	0.995	0.992	3.02263e-07
Atp5e	2.96107e-15	0.546352	0.989	0.966	6.28723e-11
Cox7a2l	3.62031e-15	0.547308	0.976	0.903	7.68701e-11
Cox5b	2.54447e-16	0.547334	0.96	0.878	5.40267e-12
Itpkc	8.82002e-11	0.547703	0.427	0.263	1.87276e-06
Slc16a2	3.87065e-11	0.547913	0.695	0.524	8.21856e-07
Tm4sf1	8.76887e-07	0.547936	0.905	0.878	0.0186189
Ndufb1-ps	3.44709e-17	0.548074	0.971	0.891	7.3192e-13
Actr3	4.26902e-14	0.549142	0.875	0.781	9.06441e-10
Fosl2	3.95131e-12	0.550219	0.833	0.688	8.38981e-08
Tyrobp	1.20198e-06	0.550857	0.156	0.154	0.0255217
Eif3e	5.52002e-15	0.55242	0.936	0.855	1.17206e-10
Tmbim6	6.59824e-18	0.553243	0.96	0.878	1.40101e-13
Lgals3	9.2521e-07	0.553962	0.419	0.429	0.019645
Nop53	6.88564e-20	0.554152	0.923	0.796	1.46203e-15
Irak3	2.09794e-10	0.554498	0.634	0.476	4.45456e-06
Gpx8	1.40178e-13	0.555045	0.899	0.783	2.97641e-09
Hilpda	2.46907e-10	0.555755	0.408	0.265	5.24258e-06
Ube2d3	1.59536e-22	0.556336	0.995	0.962	3.38742e-18
Snhg6	4.22788e-15	0.558443	0.809	0.583	8.97706e-11
Nucb2	9.11496e-16	0.558655	0.825	0.651	1.93538e-11
Srm	4.46411e-18	0.558865	0.775	0.564	9.47865e-14
mt-Co1	1.21394e-21	0.558997	0.997	0.998	2.57756e-17
Ran	4.95556e-14	0.559491	0.944	0.834	1.05221e-09
Plod3	1.14152e-17	0.559894	0.83	0.617	2.42378e-13
Socs2	2.35315e-12	0.560053	0.801	0.642	4.99645e-08
Selenow	5.48897e-17	0.560267	0.984	0.975	1.16547e-12
Eif4e	2.14381e-07	0.560328	0.796	0.629	0.00455196
Pdlim3	1.18369e-07	0.560567	0.363	0.234	0.00251333
Cryab	3.38872e-08	0.561502	0.814	0.752	0.000719527
Krtcap2	3.38183e-16	0.561957	0.979	0.916	7.18064e-12
Smim41	1.19785e-08	0.563242	0.538	0.419	0.000254339
Chmp4b	3.68181e-18	0.563315	0.947	0.844	7.81759e-14
Eef1d	6.81811e-20	0.564237	0.979	0.928	1.44769e-15
Ier5	6.42913e-10	0.564348	0.883	0.758	1.3651e-05
Srpr	1.31302e-18	0.564966	0.92	0.789	2.78793e-14
Ppp1r2	4.23428e-16	0.565114	0.942	0.88	8.99065e-12
Irs2	4.63187e-13	0.565135	0.862	0.714	9.83485e-09
Ndn	1.90022e-16	0.565259	0.801	0.6	4.03473e-12
Esd	2.53794e-11	0.566024	0.934	0.829	5.38882e-07
Il11ra1	9.40618e-13	0.566844	0.878	0.811	1.99721e-08
Ndufa1	3.41823e-18	0.567051	0.915	0.802	7.25794e-14
Hspd1	2.63148e-15	0.567522	0.875	0.707	5.58742e-11
Timm10	3.63423e-17	0.567728	0.554	0.352	7.71656e-13
Emc7	9.23213e-21	0.569092	0.928	0.731	1.96026e-16
Cnbp	1.52858e-22	0.569244	0.979	0.905	3.24563e-18
Nnmt	8.28266e-10	0.569594	0.838	0.737	1.75866e-05
Arhgdia	3.72455e-18	0.569727	0.968	0.886	7.90833e-14
Tent5a	5.16325e-07	0.570287	0.769	0.655	0.0109631
H2-D1	9.89307e-18	0.571492	0.997	0.971	2.10059e-13
Tomm20	1.23304e-15	0.571818	0.899	0.785	2.61811e-11
Nudt4	1.10757e-11	0.57278	0.676	0.543	2.35171e-07
Slc43a3	5.88272e-14	0.573632	0.96	0.909	1.24908e-09
Ubc	7.52699e-16	0.57382	0.997	0.992	1.59821e-11
Zc3h12a	6.88778e-14	0.574508	0.565	0.4	1.46248e-09
Lgals1	3.20746e-11	0.574525	0.997	0.985	6.81041e-07
Ckap4	1.29234e-12	0.574632	0.883	0.743	2.74403e-08
Rpl36al	1.90248e-17	0.575155	0.995	0.947	4.03954e-13
Plp2	3.99583e-18	0.576128	0.724	0.459	8.48434e-14
Anapc13	2.62601e-19	0.576168	0.833	0.682	5.57582e-15
Hsp90b1	7.43724e-17	0.576281	0.997	0.992	1.57915e-12
Rbm3	1.88007e-18	0.576386	0.979	0.909	3.99196e-14
Klf9	8.97364e-17	0.577405	0.976	0.964	1.90537e-12
Srsf5	1.47503e-24	0.578073	0.979	0.928	3.13194e-20
Serf2	4.60199e-14	0.578765	0.997	0.992	9.7714e-10
Hmgb1	1.9778e-21	0.578772	0.989	0.945	4.19947e-17
Qpct	1.35089e-18	0.578774	0.836	0.651	2.86834e-14
Atp5k	7.53118e-17	0.579769	0.939	0.806	1.59909e-12
Ccl6	2.67058e-12	0.581879	0.172	0.069	5.67045e-08
Pfn1	1.93329e-13	0.581976	0.971	0.931	4.10495e-09
Ppp1r14b	3.04804e-10	0.582218	0.91	0.855	6.47189e-06
Ndufa3	4.78488e-16	0.582512	0.849	0.709	1.01597e-11
Cox6c	1.36862e-19	0.583521	0.992	0.964	2.906e-15
Selenof	7.78651e-17	0.584311	0.987	0.964	1.65331e-12
Tmed5	1.39989e-14	0.584472	0.862	0.735	2.97239e-10
Fabp5	5.25022e-10	0.585905	0.515	0.339	1.11478e-05
Mif	2.14717e-12	0.586737	0.881	0.762	4.55908e-08
Prdx4	1.72657e-15	0.587041	0.923	0.785	3.66603e-11
Plaur	1.31349e-11	0.587338	0.562	0.379	2.78894e-07
Ctsb	1.74571e-18	0.587589	0.981	0.973	3.70667e-14
Pgam1	1.75951e-14	0.588596	0.894	0.76	3.73597e-10
Atp5g2	2.40329e-16	0.588672	0.942	0.88	5.10291e-12
Por	1.92743e-15	0.589099	0.798	0.659	4.09251e-11
Col6a1	1.63483e-16	0.589434	0.992	0.992	3.47124e-12
Hspe1	1.35515e-18	0.589602	0.968	0.888	2.87739e-14
Slc2a1	1.40482e-10	0.590374	0.517	0.309	2.98286e-06
Ssr3	1.08359e-16	0.591547	0.939	0.825	2.30079e-12
Sdf4	3.64928e-22	0.591649	0.95	0.851	7.74852e-18
Hif1a	2.47994e-13	0.591766	0.804	0.634	5.26565e-09
Tnxb	8.85627e-15	0.591889	0.963	0.956	1.88045e-10
Cox6a1	1.97281e-18	0.592667	0.942	0.838	4.18887e-14
Sdf2l1	2.41214e-15	0.592773	0.637	0.349	5.12169e-11
Lum	4.07487e-14	0.593807	0.997	0.992	8.65217e-10
Bmp2	8.58913e-11	0.594462	0.464	0.284	1.82373e-06
Rpl27	8.59178e-20	0.594803	1	0.996	1.82429e-15
Mrpl33	1.28588e-15	0.595266	0.939	0.819	2.73032e-11
Lgmn	6.34696e-14	0.59619	0.759	0.642	1.34765e-09
Atp5l	4.46701e-21	0.597311	0.987	0.937	9.48481e-17
Btf3	4.83236e-19	0.597547	0.992	0.954	1.02605e-14
Rnd1	3.80849e-11	0.597716	0.212	0.091	8.08657e-07
Enpp2	1.61715e-09	0.598589	0.562	0.322	3.4337e-05
Ret	7.41402e-10	0.598756	0.371	0.257	1.57422e-05
Rps14	3.98874e-21	0.598762	1	1	8.46928e-17
Naca	8.44252e-19	0.601117	0.995	0.983	1.7926e-14
Rpl35a	1.08413e-21	0.601219	0.997	1	2.30193e-17
Txn1	5.85354e-14	0.601521	0.984	0.956	1.24288e-09
Tpt1	8.19494e-20	0.601652	1	1	1.74003e-15
Ergic3	1.70882e-19	0.601748	0.95	0.823	3.62834e-15
Rpl15	1.24598e-15	0.602759	1	0.996	2.64559e-11
Cdk2ap1	4.88674e-23	0.603405	0.666	0.394	1.0376e-18
Fuca1	2.6663e-19	0.604721	0.905	0.735	5.66135e-15
Csrnp1	1.03054e-12	0.607742	0.804	0.661	2.18815e-08
Il17ra	2.53882e-15	0.608776	0.629	0.421	5.39068e-11
Rcn1	4.92704e-16	0.61143	0.907	0.749	1.04616e-11
Calu	1.30222e-19	0.611905	0.976	0.947	2.76501e-15
Metrnl	1.19957e-09	0.616013	0.753	0.611	2.54706e-05
Cfl1	8.91877e-18	0.616146	0.992	0.943	1.89372e-13
Ehd2	2.4364e-17	0.616997	0.841	0.686	5.17321e-13
Rpl31	6.04289e-20	0.617036	0.997	0.975	1.28309e-15
Rpl22	5.39519e-21	0.617344	0.997	0.994	1.14556e-16
Sub1	4.18708e-20	0.618069	0.944	0.815	8.89043e-16
Hnrnpa2b1	4.65342e-25	0.620898	0.979	0.926	9.88061e-21
Hnrnpf	9.68972e-20	0.621824	0.939	0.861	2.05742e-15
Eif4a1	9.40459e-20	0.622223	0.992	0.941	1.99688e-15
Ndufs2	3.49431e-20	0.62287	0.867	0.703	7.41948e-16
Snrpf	2.72476e-23	0.623257	0.942	0.821	5.78547e-19
Serpinh1	1.49388e-15	0.623262	1	0.992	3.17195e-11
S100a11	9.99199e-16	0.623692	0.997	0.985	2.1216e-11
Gapdh	1.34361e-14	0.626309	0.984	0.96	2.85289e-10
Mcl1	1.1719e-18	0.626962	0.966	0.952	2.48831e-14
Kdelr2	7.72118e-20	0.627582	0.963	0.909	1.63944e-15
Arpc1b	5.08543e-17	0.628338	1	0.971	1.07979e-12
Eif3i	1.21405e-20	0.628852	0.899	0.798	2.57779e-16
Bst2	3.22382e-09	0.629155	0.878	0.749	6.84513e-05
Tpm4	1.78138e-18	0.630146	0.984	0.926	3.7824e-14
Anxa1	2.11191e-14	0.632853	0.995	0.968	4.48423e-10
Laptm4a	2.1724e-23	0.633251	0.989	0.979	4.61265e-19
Itga5	5.10053e-13	0.634243	0.711	0.627	1.083e-08
Tmed2	1.26791e-20	0.634702	0.976	0.931	2.69216e-16
Cd34	3.01865e-14	0.634823	0.981	0.971	6.40951e-10
Sdcbp	1.94976e-21	0.635258	0.944	0.874	4.13992e-17
Smad7	1.63331e-13	0.635633	0.727	0.598	3.46801e-09
Pdia6	5.04213e-16	0.635974	0.984	0.931	1.0706e-11
Rpl7	9.07074e-20	0.63636	1	0.989	1.92599e-15
Ms4a4d	5.65274e-16	0.637736	0.833	0.726	1.20025e-11
Cebpd	2.18583e-13	0.637782	0.987	0.981	4.64117e-09
Rps15	1.02363e-24	0.637936	1	0.998	2.17348e-20
Nhp2	1.01842e-18	0.639171	0.759	0.531	2.1624e-14
Hnrnpa1	9.26994e-21	0.639338	0.926	0.779	1.96829e-16
Atp5mpl	7.29146e-21	0.640524	0.958	0.813	1.5482e-16
Gas1	5.90023e-08	0.64097	0.82	0.827	0.0012528
Nsa2	1.01308e-22	0.641426	0.936	0.844	2.15107e-18
Hk2	1.13923e-12	0.642397	0.942	0.876	2.41892e-08
Tomm6	6.68214e-26	0.645325	0.958	0.895	1.41882e-21
Sat1	7.84032e-12	0.645753	0.971	0.903	1.66474e-07
Tubb6	2.00866e-18	0.647704	0.883	0.709	4.26499e-14
Slc25a5	3.74133e-19	0.647827	0.912	0.739	7.94396e-15
Rpl23	9.55188e-21	0.649004	1	1	2.02815e-16
Wfdc17	1.63497e-07	0.651103	0.093	0.128	0.00347154
Cd63	1.26016e-26	0.651151	1	0.985	2.6757e-22
Aldh2	1.35925e-26	0.654349	0.984	0.916	2.88609e-22
Fkbp9	2.56966e-20	0.655153	0.95	0.842	5.45617e-16
Eif5a	2.54935e-21	0.656868	0.984	0.96	5.41304e-17
Vasn	1.27889e-13	0.660279	0.912	0.726	2.71547e-09
Nfil3	1.09672e-13	0.661202	0.682	0.453	2.32866e-09
Axl	5.21196e-15	0.662441	0.944	0.912	1.10666e-10
Pim1	8.26998e-18	0.665228	0.936	0.872	1.75596e-13
Nme2	2.30073e-17	0.665391	0.997	0.973	4.88514e-13
Lamb1	1.50462e-11	0.667037	0.846	0.775	3.19477e-07
Arl4a	7.78896e-18	0.669559	0.801	0.575	1.65383e-13
Pdia4	1.1601e-20	0.67113	0.87	0.714	2.46324e-16
Selenop	4.9257e-22	0.671855	0.976	0.954	1.04587e-17
Pgk1	1.75821e-16	0.672053	0.814	0.608	3.7332e-12
Ppa1	9.89243e-13	0.672139	0.79	0.573	2.10046e-08
Srxn1	2.88036e-09	0.672165	0.594	0.457	6.11588e-05
Id3	6.07005e-09	0.673817	0.923	0.798	0.000128885
Rpl17	3.35538e-23	0.674512	1	0.996	7.12448e-19
P4hb	9.96673e-20	0.675454	0.981	0.928	2.11624e-15
Kcnq1ot1	2.29421e-09	0.675971	0.708	0.644	4.87129e-05
Cyb5a	2.38167e-25	0.676461	0.984	0.952	5.05699e-21
Rpl26	3.13977e-25	0.676563	0.995	0.996	6.66667e-21
Rpl24	2.09612e-23	0.67668	0.997	0.992	4.4507e-19
Rps13	9.85443e-25	0.679212	0.997	0.998	2.09239e-20
B2m	1.16453e-27	0.680097	0.997	0.992	2.47265e-23
Rps10	3.28749e-22	0.680766	1	1	6.98034e-18
Rpl35	1.1053e-22	0.681294	1	0.996	2.34689e-18
Tuba1b	1.99379e-15	0.682387	0.796	0.728	4.23342e-11
Slc39a14	2.25153e-13	0.682486	0.698	0.453	4.78068e-09
H3f3b	1.04039e-22	0.682738	0.997	0.994	2.20906e-18
Tubb5	4.56342e-14	0.682795	0.891	0.836	9.68951e-10
Col6a2	4.20261e-20	0.68356	0.989	0.973	8.9234e-16
Srgn	2.60518e-10	0.683905	0.281	0.183	5.53158e-06
Penk	9.77731e-12	0.684497	0.273	0.103	2.07602e-07
Rgcc	7.00514e-08	0.684625	0.496	0.274	0.0014874
Rpl8	3.95577e-25	0.685103	1	0.992	8.39928e-21
Rps9	1.80238e-25	0.685468	1	1	3.82699e-21
Myc	4.26711e-17	0.685806	0.822	0.644	9.06036e-13
Vim	3.47968e-18	0.688033	1	1	7.38841e-14
Angptl1	1.59437e-14	0.68811	0.422	0.246	3.38532e-10
Npm1	3.40876e-20	0.689963	0.987	0.958	7.23783e-16
Sec61g	1.46718e-21	0.691126	0.981	0.958	3.11527e-17
Rps17	1.34202e-26	0.692551	0.997	0.985	2.84951e-22
Kdm6b	7.7341e-16	0.693151	0.897	0.806	1.64218e-11
Gabarap	4.69073e-23	0.694045	0.989	0.971	9.95982e-19
Rpl7a	2.47744e-26	0.697569	0.997	0.994	5.26034e-22
Rpl28	2.07205e-23	0.697629	1	0.994	4.39958e-19
Rps23	5.66776e-28	0.698593	1	0.996	1.20344e-23
Rps8	7.10973e-24	0.700037	1	0.998	1.50961e-19
Lgals3bp	1.29617e-15	0.700281	0.878	0.718	2.75216e-11
Adamts1	4.48401e-11	0.701145	0.91	0.808	9.52089e-07
Rps11	1.79718e-24	0.703316	1	0.996	3.81595e-20
Zyx	2.92412e-17	0.703751	0.804	0.705	6.20878e-13
Rps24	7.71978e-25	0.704387	1	1	1.63914e-20
Actb	1.682e-21	0.705142	1	0.998	3.57139e-17
Rplp1	1.25237e-22	0.707076	1	1	2.65916e-18
Rcn3	8.36496e-21	0.707725	0.981	0.939	1.77613e-16
Itm2b	2.62643e-30	0.708242	1	0.994	5.57671e-26
Rpl30	1.23519e-27	0.708556	1	1	2.62268e-23
Bsg	7.20522e-23	0.709812	0.984	0.947	1.52988e-18
S1pr3	2.0956e-13	0.710414	0.483	0.286	4.44958e-09
Rpl11	2.46471e-25	0.71161	1	0.992	5.23331e-21
Ifi211	1.41368e-17	0.711994	0.663	0.425	3.00166e-13
Rps3	2.50239e-23	0.712076	0.997	0.987	5.31331e-19
Rpl34	9.04359e-26	0.712329	1	1	1.92023e-21
Calr	9.64425e-25	0.715009	0.997	0.992	2.04776e-20
Arpc3	2.95874e-27	0.717076	0.987	0.935	6.2823e-23
Dcn	8.00784e-35	0.717488	1	1	1.7003e-30
Uap1	4.05567e-11	0.721376	0.979	0.893	8.61141e-07
Rpl13	5.89304e-29	0.722634	1	1	1.25127e-24
Rps3a1	8.52729e-24	0.723219	0.997	0.996	1.8106e-19
Rps16	1.75823e-29	0.723579	1	0.998	3.73326e-25
Nucb1	3.39609e-28	0.724024	0.926	0.819	7.21092e-24
Tmed3	5.85996e-24	0.724758	0.976	0.907	1.24425e-19
Tfpi2	2.72952e-12	0.72568	0.366	0.181	5.79559e-08
Fau	5.05726e-29	0.726036	1	0.998	1.07381e-24
Rps7	8.42719e-24	0.726789	1	0.998	1.78935e-19
Rps15a	5.57076e-23	0.727075	1	0.992	1.18284e-18
Cxcl12	4.04465e-08	0.728472	0.679	0.509	0.0008588
Rpl18a	8.56258e-27	0.729526	1	1	1.81809e-22
Rpl36	1.0399e-29	0.729572	1	1	2.20801e-25
Actg1	7.20148e-17	0.729822	0.997	0.987	1.52909e-12
Has1	1.58317e-06	0.730491	0.729	0.543	0.0336154
Rpl29	1.40614e-23	0.730553	0.997	0.987	2.98565e-19
Col5a3	3.50873e-13	0.731122	0.745	0.722	7.45009e-09
Eef2	1.08082e-24	0.731869	0.992	0.994	2.2949e-20
Rpl4	4.52203e-27	0.732185	1	0.989	9.60163e-23
Ccl19	8.29349e-09	0.732674	0.363	0.259	0.000176096
Rpl23a	9.6786e-28	0.735036	0.997	0.989	2.05506e-23
Rbp4	1.50291e-08	0.73568	0.316	0.192	0.000319113
Chchd2	5.69795e-30	0.738202	0.997	0.979	1.20985e-25
Rpl18	4.69881e-28	0.740276	1	0.989	9.97699e-24
Nr4a1	8.90142e-11	0.742453	0.851	0.829	1.89004e-06
Rpl39	2.89726e-23	0.743096	1	0.996	6.15174e-19
Vkorc1	6.80516e-24	0.745216	0.915	0.766	1.44494e-19
Rps20	1.52453e-24	0.746447	1	0.998	3.23704e-20
Cd302	1.65082e-28	0.746903	0.973	0.901	3.50519e-24
Spon1	2.92535e-20	0.751139	0.838	0.606	6.21141e-16
Rpl37	1.05863e-29	0.756426	1	0.998	2.24779e-25
Rpl19	3.59319e-30	0.758521	1	0.996	7.62942e-26
Ccdc71l	4.11776e-22	0.759841	0.469	0.217	8.74324e-18
Rpl37a	1.54374e-29	0.761106	1	1	3.27783e-25
Rack1	3.8305e-26	0.761966	1	0.996	8.13331e-22
Slc10a6	7.44088e-14	0.762357	0.568	0.269	1.57992e-09
Pnp	1.20265e-17	0.764846	0.966	0.928	2.55358e-13
Rnase4	1.80707e-33	0.76909	0.989	0.975	3.83694e-29
Aldoa	2.3621e-27	0.771223	0.981	0.914	5.01546e-23
Rpl21	5.3388e-34	0.771844	0.997	1	1.13359e-29
Nfkbia	9.38889e-18	0.776133	0.947	0.901	1.99354e-13
Ifitm2	1.40077e-30	0.778593	0.997	0.977	2.97425e-26
Tuba1a	7.93345e-13	0.781433	0.926	0.897	1.68451e-08
Rps4x	2.14168e-28	0.781959	1	0.998	4.54743e-24
Rps27a	2.73444e-29	0.782196	1	0.992	5.80604e-25
Pdia3	1.73929e-28	0.782923	0.995	0.954	3.69304e-24
Tapbp	1.66793e-33	0.78293	0.942	0.817	3.54152e-29
Rps27	5.09152e-34	0.784828	1	1	1.08108e-29
Eif3f	3.36082e-28	0.78636	0.984	0.945	7.13602e-24
Fbln2	7.39238e-18	0.793973	0.979	0.971	1.56962e-13
Rps5	2.58234e-30	0.79399	0.997	0.996	5.48308e-26
Rpl36a	1.83314e-27	0.795621	0.995	0.979	3.89231e-23
Eef1g	4.84753e-28	0.795694	0.989	0.943	1.02928e-23
Enc1	4.21203e-15	0.797139	0.658	0.444	8.9434e-11
Ifi204	3.8885e-13	0.799076	0.584	0.392	8.25646e-09
Ifi207	1.65359e-12	0.799912	0.57	0.383	3.51106e-08
Rpl32	1.33635e-26	0.800649	1	0.992	2.83746e-22
Rpl6	9.21155e-32	0.801149	1	1	1.95589e-27
Rpl27a	2.38819e-32	0.802794	1	1	5.07083e-28
Mgst1	6.27226e-25	0.804464	0.886	0.766	1.33179e-20
Rpl12	1.49784e-30	0.809367	1	0.994	3.18036e-26
Id2	1.28657e-13	0.811685	0.761	0.579	2.73177e-09
Steap4	2.936e-12	0.811895	0.501	0.267	6.23402e-08
Eef1a1	7.37615e-30	0.812477	1	1	1.56618e-25
Gsn	6.25214e-30	0.814044	0.997	1	1.32752e-25
Rps19	2.32863e-34	0.816302	1	0.998	4.94438e-30
Ly6e	3.19658e-21	0.818595	0.963	0.905	6.7873e-17
Rpl9	1.948e-32	0.821665	0.997	0.989	4.13619e-28
Rpl5	7.80663e-35	0.822725	1	0.983	1.65758e-30
Igfbp4	1.5905e-21	0.824333	0.997	0.973	3.37712e-17
Htra3	4.01177e-20	0.826576	0.976	0.968	8.51819e-16
Pabpc1	2.22096e-29	0.826583	0.973	0.924	4.71577e-25
Rpl14	3.19706e-35	0.827057	1	0.994	6.78831e-31
Ramp2	1.92375e-22	0.82914	0.873	0.735	4.0847e-18
Pcolce	1.29366e-29	0.832313	0.997	0.983	2.74682e-25
Rps25	5.72601e-37	0.83324	0.997	0.989	1.2158e-32
Anxa5	2.21751e-28	0.833905	0.992	0.973	4.70844e-24
Errfi1	8.19778e-16	0.835302	0.889	0.783	1.74063e-11
Ldha	1.88834e-28	0.835549	0.968	0.865	4.00952e-24
Rpl13a	1.47639e-36	0.835734	1	1	3.13482e-32
Sod3	9.82285e-25	0.836178	0.979	0.907	2.08569e-20
Ccn1	6.40737e-09	0.843468	0.838	0.714	0.000136048
Rps21	1.93534e-39	0.843726	1	0.998	4.1093e-35
Gm11808	8.10182e-40	0.849975	0.751	0.404	1.72026e-35
Rpl10a	1.0417e-29	0.851515	0.997	0.989	2.21185e-25
Rplp2	2.48915e-40	0.856088	0.997	0.998	5.28522e-36
Rpn2	2.03693e-39	0.857861	0.973	0.878	4.32501e-35
Rpl3	4.06421e-34	0.859488	0.997	0.987	8.62954e-30
Ppib	2.29863e-31	0.861674	0.992	0.977	4.88068e-27
Btg1	1.08101e-25	0.863915	0.95	0.897	2.29531e-21
Serpine2	9.05338e-18	0.865532	0.912	0.838	1.9223e-13
Rpl38	2.70316e-39	0.865938	1	0.998	5.73963e-35
Rps6	1.31996e-35	0.866175	1	0.996	2.80266e-31
Rpl10	5.67894e-36	0.870108	0.997	0.998	1.20581e-31
Ifitm3	4.71144e-33	0.870408	1	0.996	1.00038e-28
Rpl22l1	6.9357e-28	0.87216	0.989	0.971	1.47266e-23
Rplp0	1.52603e-29	0.873126	1	0.998	3.24021e-25
Gpx3	4.04281e-24	0.875564	0.95	0.949	8.5841e-20
Eef1b2	2.34121e-27	0.87593	0.997	0.977	4.9711e-23
Ddost	1.05799e-34	0.879331	0.95	0.804	2.24643e-30
Sgk1	1.5415e-12	0.88593	0.849	0.663	3.27306e-08
Rps12	6.6411e-37	0.890986	1	1	1.4101e-32
Gas6	8.08707e-13	0.894119	0.806	0.821	1.71713e-08
Dpt	1.21241e-37	0.89706	1	0.992	2.57431e-33
Olfml3	2.29006e-27	0.897402	0.968	0.909	4.86248e-23
Pi15	5.61594e-15	0.903096	0.729	0.509	1.19243e-10
Rps29	3.75284e-43	0.909028	1	1	7.96841e-39
Rps26	2.44019e-38	0.911344	1	0.992	5.18125e-34
Timp1	2.17467e-10	0.91143	0.923	0.798	4.61749e-06
Tnfaip2	9.96106e-16	0.913124	0.775	0.678	2.11503e-11
Gm13889	3.44756e-08	0.917053	0.318	0.154	0.000732021
Vcam1	3.21019e-10	0.921738	0.825	0.724	6.81619e-06
Ly6c1	1.28499e-08	0.923786	0.597	0.484	0.000272841
Rpl41	1.49636e-32	0.929741	1	1	3.17722e-28
Efemp1	1.00045e-13	0.930177	0.361	0.175	2.12426e-09
Glul	5.95006e-23	0.93025	0.912	0.808	1.26338e-18
Mgp	2.87782e-18	0.933191	0.997	0.994	6.11048e-14
Dpep1	6.79553e-22	0.944456	0.918	0.827	1.4429e-17
Nid1	8.83245e-36	0.948059	0.984	0.949	1.87539e-31
Ly6a	6.684e-14	0.948854	0.905	0.884	1.41921e-09
Apod	2.91835e-08	0.9511	0.615	0.503	0.000619653
Rpsa	5.89471e-39	0.958279	1	0.998	1.25162e-34
Rps18	8.67116e-40	0.963053	1	0.998	1.84115e-35
Fth1	5.01503e-36	0.963238	1	0.998	1.06484e-31
Tcf21	3.8354e-24	0.963441	0.905	0.846	8.1437e-20
Rps2	3.47299e-34	0.975963	1	0.987	7.3742e-30
Tuba1c	4.68085e-42	0.978032	0.769	0.364	9.93886e-38
Thbd	3.112e-13	0.984689	0.623	0.571	6.60771e-09
Rdh10	2.24613e-15	1.00234	0.57	0.331	4.7692e-11
Fst	1.09846e-20	1.00272	0.342	0.116	2.33236e-16
Rps28	1.13227e-50	1.01514	1	0.998	2.40415e-46
Pakap.1	1.35348e-28	1.01559	0.942	0.888	2.87385e-24
G530011O06Rik	4.24596e-29	1.02572	0.589	0.257	9.01545e-25
Ccdc80	3.07151e-35	1.03092	0.997	0.994	6.52173e-31
Cebpb	6.94435e-32	1.03521	0.976	0.941	1.47449e-27
Spp1	1.12328e-16	1.05724	0.523	0.524	2.38505e-12
Hsd11b1	1.17627e-19	1.07089	0.61	0.4	2.49757e-15
Gm21860	7.34089e-44	1.07311	0.446	0.074	1.55869e-39
Gm47283	4.00509e-43	1.0839	0.936	0.741	8.50402e-39
Ssr4	7.10815e-42	1.08568	0.987	0.916	1.50927e-37
Fmo2	2.37123e-23	1.11074	0.637	0.469	5.03483e-19
Pgf	2.44556e-20	1.14598	0.56	0.383	5.19266e-16
Ifi27l2a	1.68221e-22	1.15078	0.96	0.952	3.57184e-18
Myoc	3.3648e-11	1.15642	0.395	0.265	7.14449e-07
Chil3	7.7287e-10	1.16873	0.125	0.011	1.64103e-05
Odc1	1.64209e-27	1.17122	0.912	0.705	3.48665e-23
Ifi205	9.87245e-23	1.17384	0.66	0.469	2.09622e-18
Sod2	4.14228e-38	1.19007	0.897	0.688	8.79531e-34
Gja1	3.22842e-23	1.20591	0.769	0.463	6.8549e-19
Ccl7	1.04531e-07	1.23716	0.528	0.381	0.00221951
Srpx	8.44324e-35	1.29506	0.732	0.495	1.79275e-30
Sdc4	6.88504e-50	1.33082	0.878	0.693	1.4619e-45
Fgl2	2.25606e-23	1.36135	0.796	0.589	4.7903e-19
Cxcl2	1.85582e-08	1.36274	0.469	0.276	0.000394047
Hspb1	4.45289e-29	1.40288	0.912	0.823	9.45483e-25
Gm12840	1.09438e-28	1.45517	0.87	0.653	2.32371e-24
Ch25h	1.47715e-17	1.49212	0.371	0.156	3.13643e-13
Ccl2	7.7461e-11	1.67148	0.565	0.362	1.64473e-06
Mt1	6.82971e-49	1.71278	0.989	0.943	1.45015e-44
Ptx3	1.85243e-20	1.93463	0.759	0.505	3.93326e-16
Mt2	8.05388e-58	1.98272	0.981	0.762	1.71008e-53
Prg4	1.78559e-31	2.04525	0.836	0.543	3.79134e-27
S100a9	5.29168e-31	2.0492	0.212	0.046	1.12358e-26
Lcn2	3.76006e-16	2.07752	0.374	0.059	7.98372e-12
S100a8	1.25625e-25	2.10673	0.162	0.036	2.6674e-21

## Sheet: 5 Endothelial cells 1
	p_val	avg_log2FC	pct.1	pct.2	p_val_adj
Id1	2.19736e-64	1.80782	0.959	0.868	4.66565e-60
Sgk1	8.94244e-42	1.33516	0.942	0.898	1.89875e-37
Ctla2a	7.27935e-29	1.28963	0.962	0.858	1.54562e-24
Mt1	1.41113e-20	1.26007	0.591	0.377	2.99626e-16
Spry1	1.09067e-35	1.25194	0.707	0.361	2.31581e-31
Csrnp1	1.00454e-28	1.20335	0.791	0.585	2.13294e-24
Plaur	6.02864e-26	1.19558	0.609	0.303	1.28006e-21
Cxcl12	2.3991e-25	1.1682	0.962	0.918	5.094e-21
Hspa1a	8.71984e-20	1.16606	0.675	0.429	1.85148e-15
Atf3	1.89386e-18	1.14678	0.901	0.794	4.02124e-14
Tuba1a	2.32803e-30	1.142	0.93	0.868	4.94311e-26
Nfkbia	2.94665e-20	1.11008	0.904	0.83	6.25663e-16
Trib1	1.82557e-23	1.10703	0.696	0.431	3.87624e-19
Cdkn1a	1.42765e-22	1.0577	0.919	0.828	3.03133e-18
Odc1	4.52422e-19	1.05704	0.643	0.443	9.60627e-15
Hbegf	5.40353e-20	1.05495	0.626	0.451	1.14733e-15
Socs3	5.34669e-19	1.04926	0.901	0.82	1.13526e-14
Sertad1	1.70605e-27	1.02966	0.87	0.743	3.62246e-23
Icam1	5.5936e-15	1.02133	0.661	0.553	1.18769e-10
Tm4sf1	3.36532e-21	1.01367	0.965	0.944	7.14558e-17
Fosb	1.67824e-21	0.984584	0.951	0.906	3.56341e-17
Kdelr2	1.36053e-32	0.975915	0.728	0.479	2.88882e-28
Rps2	4.595e-20	0.966599	0.986	0.958	9.75656e-16
Jund	5.98239e-23	0.961019	0.994	0.972	1.27024e-18
Morf4l2	2.00104e-32	0.960463	0.783	0.547	4.24881e-28
Cebpb	2.09742e-21	0.959732	0.722	0.477	4.45346e-17
Sec61g	4.04321e-26	0.957988	0.93	0.802	8.58494e-22
Ubc	5.93336e-25	0.947648	0.994	0.976	1.25983e-20
Lmna	6.83659e-16	0.945863	0.832	0.78	1.45161e-11
Gapdh	2.65958e-20	0.943806	0.933	0.908	5.64709e-16
Hspb1	1.87465e-23	0.941831	0.977	0.904	3.98045e-19
Anxa5	6.79296e-27	0.93942	0.901	0.766	1.44235e-22
Pim3	7.52539e-18	0.926366	0.867	0.816	1.59787e-13
Id3	6.33214e-21	0.924687	0.936	0.928	1.3445e-16
Emp1	2.7274e-12	0.924264	0.823	0.607	5.79108e-08
Tmem252	3.4494e-08	0.908143	0.357	0.255	0.000732412
Tuba1b	3.18923e-28	0.906861	0.884	0.778	6.77169e-24
Chchd2	3.26681e-25	0.901838	0.98	0.952	6.93643e-21
Mcl1	4.25151e-21	0.895271	0.922	0.848	9.02724e-17
Eif1	1.41003e-23	0.892399	0.994	0.99	2.99392e-19
Ddx5	6.006e-28	0.885054	0.988	0.974	1.27525e-23
Klf4	5.06577e-18	0.88151	0.954	0.94	1.07561e-13
Actg1	3.69628e-19	0.878031	0.983	0.988	7.8483e-15
Hspa8	2.23504e-20	0.876536	0.994	0.984	4.74567e-16
Tinagl1	4.79472e-17	0.876147	0.884	0.76	1.01806e-12
Arpc5	4.513e-26	0.872223	0.8	0.633	9.58246e-22
Arf1	7.41758e-25	0.871019	0.919	0.842	1.57497e-20
Depp1	5.37502e-12	0.866292	0.6	0.375	1.14128e-07
Anxa2	3.13184e-17	0.862753	0.925	0.818	6.64984e-13
Actb	4.88894e-21	0.859121	0.997	0.992	1.03807e-16
Arid5a	2.45625e-22	0.859054	0.759	0.531	5.21536e-18
S100a11	1.2052e-16	0.857549	0.925	0.868	2.559e-12
Snu13	9.25793e-20	0.856878	0.864	0.758	1.96574e-15
Ly6a	5.14611e-21	0.854928	0.994	0.978	1.09267e-16
Hnrnpf	1.41888e-23	0.854918	0.919	0.862	3.0127e-19
Maff	1.91904e-22	0.854372	0.632	0.373	4.0747e-18
Btg2	1.31284e-17	0.84955	0.968	0.938	2.78756e-13
Phlda1	5.23036e-13	0.842487	0.574	0.415	1.11056e-08
Tnnt2	9.70683e-24	0.842332	0.536	0.257	2.06105e-19
Rnd1	6.18381e-11	0.832325	0.542	0.395	1.31301e-06
Ptma	1.89701e-22	0.831236	0.997	0.996	4.02793e-18
Zfp36	9.51315e-15	0.82856	0.948	0.906	2.01993e-10
Hspa5	3.40545e-19	0.826398	0.93	0.892	7.23079e-15
Ctla2b	1.30529e-23	0.822546	0.664	0.405	2.77152e-19
Srpr	5.12277e-25	0.822316	0.745	0.549	1.08772e-20
S100a1	9.89309e-26	0.821537	0.78	0.665	2.1006e-21
Rpl41	1.45723e-19	0.815449	0.997	0.996	3.09414e-15
Ier3	3.13421e-10	0.814797	0.864	0.735	6.65487e-06
Ost4	5.00836e-21	0.813016	0.87	0.77	1.06343e-16
Kdm6b	2.82274e-16	0.812376	0.826	0.709	5.99352e-12
Junb	5.33622e-14	0.811266	0.968	0.948	1.13304e-09
Tagln2	4.50599e-17	0.811032	0.945	0.908	9.56756e-13
Hes1	6.44397e-14	0.81083	0.809	0.665	1.36825e-09
Atf4	2.13782e-19	0.810105	0.904	0.82	4.53923e-15
Cfl1	3.00702e-19	0.809292	0.959	0.966	6.3848e-15
Arl1	3.08567e-24	0.80885	0.728	0.551	6.5518e-20
Myl12a	9.63513e-19	0.803866	0.957	0.922	2.04583e-14
Adamts1	6.39205e-13	0.803138	0.933	0.826	1.35722e-08
Bhlhe40	5.36506e-13	0.802722	0.751	0.657	1.13916e-08
Rgcc	7.7806e-17	0.799936	0.951	0.946	1.65205e-12
H3f3b	4.27358e-16	0.797896	0.994	0.986	9.0741e-12
Slc3a2	3.27503e-16	0.793476	0.786	0.595	6.95387e-12
Pnp	2.84766e-16	0.788958	0.843	0.735	6.04643e-12
Nme2	1.05821e-15	0.788597	0.942	0.892	2.24689e-11
Ssr2	8.64262e-20	0.788233	0.707	0.559	1.83509e-15
Mfge8	1.14945e-19	0.787053	0.852	0.752	2.44064e-15
Fxyd5	1.44243e-10	0.782886	0.846	0.707	3.06271e-06
Klf6	3.76866e-15	0.782149	0.928	0.844	8.002e-11
Cope	3.79605e-22	0.782045	0.768	0.563	8.06015e-18
Selenok	6.50774e-20	0.777916	0.93	0.834	1.38179e-15
Apold1	4.19261e-13	0.776912	0.881	0.794	8.90218e-09
Myl6	1.01256e-17	0.773379	0.983	0.984	2.14998e-13
Tpm4	1.70475e-17	0.770883	0.93	0.926	3.6197e-13
Dusp6	3.25434e-14	0.770315	0.733	0.571	6.90995e-10
Gabarap	8.5293e-18	0.767498	0.907	0.832	1.81103e-13
Tpm3	5.21801e-18	0.760182	0.959	0.924	1.10794e-13
Dnaja1	1.17195e-18	0.760173	0.933	0.916	2.48841e-14
Yrdc	5.66762e-22	0.759598	0.6	0.393	1.20341e-17
Sox17	2.38992e-11	0.758967	0.762	0.583	5.07453e-07
Noct	3.30218e-10	0.758871	0.583	0.349	7.01152e-06
Tnfrsf12a	5.48809e-28	0.755822	0.484	0.2	1.16529e-23
Cd81	8.39419e-17	0.746701	0.977	0.96	1.78234e-12
Btg1	6.24882e-15	0.746084	0.89	0.818	1.32681e-10
Dusp1	3.80497e-13	0.741806	0.954	0.914	8.07908e-09
Rhoc	4.86919e-13	0.73513	0.916	0.872	1.03387e-08
Ly6c1	6.00898e-18	0.735042	0.991	0.988	1.27589e-13
Hnrnpa1	2.4899e-16	0.732507	0.817	0.653	5.2868e-12
Cebpd	1.84087e-10	0.732039	0.872	0.707	3.90872e-06
Cd151	1.52596e-18	0.73054	0.87	0.737	3.24007e-14
Klf2	1.20572e-11	0.728284	0.977	0.952	2.5601e-07
Ldha	2.55632e-16	0.727594	0.907	0.868	5.42784e-12
Cdc42ep2	2.56473e-19	0.727591	0.667	0.521	5.44569e-15
Rps27	3.19356e-15	0.725286	0.986	0.984	6.78089e-11
Cox6a1	1.55754e-20	0.721879	0.907	0.836	3.30712e-16
Cycs	8.56373e-19	0.719322	0.791	0.603	1.81834e-14
Rps28	1.06108e-13	0.719018	0.988	0.982	2.25298e-09
Fkbp1a	3.72096e-14	0.717012	0.942	0.914	7.90072e-10
Gm47283	1.65759e-15	0.714299	0.716	0.515	3.51957e-11
Hsp90aa1	4.79461e-16	0.713687	0.899	0.852	1.01804e-11
Arf4	9.29725e-16	0.713642	0.896	0.79	1.97408e-11
Dnajb1	7.20914e-11	0.712862	0.791	0.575	1.53072e-06
Irgm1	3.89011e-12	0.712552	0.623	0.447	8.25988e-08
Irf1	4.40699e-10	0.70949	0.849	0.756	9.35737e-06
Gng5	2.59985e-14	0.709349	0.954	0.902	5.52025e-10
Midn	4.9542e-15	0.70735	0.852	0.717	1.05193e-10
Selenof	4.41942e-15	0.707083	0.916	0.846	9.38375e-11
Tmed3	1.25727e-18	0.705383	0.652	0.451	2.66957e-14
Ssr4	5.60645e-15	0.703693	0.788	0.651	1.19042e-10
Copb2	2.17789e-20	0.700473	0.693	0.465	4.62432e-16
Tomm7	3.16266e-16	0.699725	0.896	0.846	6.71527e-12
Rabac1	3.72423e-19	0.698816	0.901	0.812	7.90765e-15
Cenpb	2.17735e-17	0.69795	0.87	0.752	4.62317e-13
Cox8a	6.15394e-15	0.697666	0.957	0.878	1.30667e-10
Gpihbp1	1.86131e-14	0.695204	0.98	0.96	3.95213e-10
Tubb2a	1.26793e-14	0.694302	0.806	0.699	2.6922e-10
Rps29	4.30802e-16	0.694222	1	0.996	9.14722e-12
Slc25a5	1.38512e-13	0.694195	0.841	0.782	2.94102e-09
Eif5a	2.48397e-15	0.694124	0.899	0.836	5.27421e-11
Ly6e	2.47745e-16	0.688905	0.997	0.99	5.26037e-12
Ccnl1	7.67318e-14	0.687375	0.867	0.8	1.62925e-09
Gabarapl2	8.48041e-18	0.686049	0.852	0.756	1.80065e-13
Gstm1	6.77332e-20	0.684972	0.826	0.681	1.43818e-15
Rpl10	2.18189e-11	0.684405	0.965	0.954	4.6328e-07
Fabp5	2.23656e-10	0.684088	0.954	0.894	4.7489e-06
Calr	4.67259e-14	0.682511	0.93	0.872	9.9213e-10
Eif4a1	1.21133e-14	0.681219	0.919	0.898	2.57202e-10
Cdc42ep3	7.33254e-12	0.678311	0.757	0.675	1.55692e-07
Sat1	6.09432e-10	0.675138	0.823	0.687	1.29401e-05
Fabp4	6.91547e-15	0.674585	1	1	1.46836e-10
Ifitm2	6.33926e-14	0.674302	0.983	0.956	1.34602e-09
Aldoa	1.87398e-13	0.673952	0.884	0.83	3.97902e-09
Tomm6	9.79976e-16	0.67352	0.87	0.729	2.08078e-11
Rhoa	2.23011e-15	0.668875	0.942	0.916	4.73518e-11
Rnasek	1.22849e-14	0.668812	0.794	0.673	2.60846e-10
Ppp1r2	4.69394e-14	0.668563	0.939	0.91	9.96665e-10
Tmed2	1.37238e-17	0.668306	0.843	0.729	2.91397e-13
Crip1	2.83913e-11	0.668167	0.942	0.946	6.02832e-07
Itm2b	1.37694e-12	0.667033	0.986	0.986	2.92365e-08
Dynll1	6.96886e-14	0.666079	0.962	0.94	1.4797e-09
Ndufa4	2.53569e-17	0.665466	0.925	0.89	5.38402e-13
Timp3	1.43194e-12	0.665419	0.962	0.928	3.04043e-08
Id2	3.15207e-13	0.66381	0.632	0.455	6.69278e-09
Rbm3	2.516e-13	0.662074	0.899	0.828	5.34223e-09
Myc	6.63313e-10	0.659855	0.304	0.112	1.40841e-05
Laptm4a	9.37134e-16	0.658396	0.948	0.886	1.98982e-11
Rhob	3.31102e-11	0.657259	0.893	0.852	7.03028e-07
Grpel1	3.66659e-18	0.65715	0.641	0.435	7.78527e-14
1810037I17Rik	6.40922e-16	0.656804	0.861	0.758	1.36087e-11
S100a10	5.00098e-11	0.655715	0.936	0.886	1.06186e-06
Gnb2	7.06808e-15	0.652335	0.939	0.896	1.50076e-10
Gm11808	9.26174e-22	0.652025	0.586	0.295	1.96655e-17
Cox6b1	4.27924e-13	0.649784	0.904	0.86	9.08611e-09
Anp32a	7.5304e-16	0.648786	0.939	0.884	1.59893e-11
Gng11	3.51853e-13	0.648154	0.98	0.97	7.47089e-09
Mrpl52	1.95075e-11	0.646475	0.817	0.677	4.14203e-07
Pxdc1	1.61504e-15	0.6464	0.632	0.451	3.42922e-11
Crip2	7.09553e-14	0.643867	0.942	0.938	1.50659e-09
Vwa1	5.54518e-09	0.642906	0.742	0.601	0.000117741
Krtcap2	5.2649e-12	0.641522	0.858	0.782	1.1179e-07
Skil	4.33089e-14	0.634637	0.635	0.445	9.19579e-10
Sparc	4.26118e-10	0.633205	0.997	0.99	9.04777e-06
Ifitm3	1.07713e-10	0.632449	0.991	0.992	2.28707e-06
Gdi2	1.1924e-14	0.632435	0.881	0.745	2.53183e-10
Eloc	7.8769e-14	0.631236	0.791	0.685	1.6725e-09
Rps21	1.22967e-11	0.629644	0.994	0.992	2.61097e-07
Clic1	9.78472e-11	0.629209	0.928	0.892	2.07759e-06
Hmgb1	2.13531e-14	0.628145	0.965	0.908	4.53391e-10
Msn	3.37498e-12	0.627829	0.954	0.918	7.1661e-08
Cox7a2	1.19295e-13	0.627644	0.91	0.874	2.53299e-09
Dusp2	1.21752e-06	0.626846	0.449	0.305	0.0258516
Ubb	8.28736e-12	0.626813	0.986	0.994	1.75966e-07
Ecscr	5.76277e-11	0.626066	0.928	0.868	1.22361e-06
Lsm4	4.20839e-15	0.625553	0.696	0.491	8.93567e-11
Rdx	6.17385e-13	0.623922	0.881	0.776	1.31089e-08
Uqcrq	7.49382e-13	0.622419	0.878	0.822	1.59116e-08
Capg	2.65569e-07	0.621768	0.487	0.355	0.00563882
Ccn1	2.65306e-07	0.621435	0.672	0.587	0.00563325
Tmco1	9.14348e-16	0.620966	0.777	0.599	1.94144e-11
Arhgdia	3.14766e-14	0.620805	0.925	0.884	6.68343e-10
Cox6c	1.33942e-12	0.620425	0.957	0.928	2.84399e-08
Cav2	2.00077e-14	0.620324	0.916	0.878	4.24823e-10
Ier5	2.10938e-10	0.618481	0.881	0.816	4.47885e-06
Tbrg1	6.15017e-14	0.6177	0.722	0.613	1.30587e-09
Eif5	7.59069e-15	0.617311	0.893	0.788	1.61173e-10
Smad7	4.11342e-13	0.615809	0.812	0.725	8.73403e-09
Tmed9	1.6549e-12	0.61569	0.803	0.699	3.51384e-08
Mrpl33	1.41547e-11	0.614457	0.823	0.693	3.00547e-07
Gngt2	6.25363e-13	0.612469	0.907	0.878	1.32783e-08
Sfr1	8.48083e-13	0.61218	0.814	0.713	1.80073e-08
Cltb	2.59038e-14	0.61126	0.89	0.8	5.50014e-10
Zfand5	1.84537e-10	0.610901	0.881	0.808	3.91828e-06
Tspo	4.38701e-09	0.610611	0.855	0.758	9.31494e-05
Tubb4b	9.44896e-12	0.609855	0.901	0.866	2.0063e-07
Ankrd1	3.04708e-17	0.609474	0.235	0.08	6.46986e-13
Mrfap1	8.36473e-13	0.60886	0.855	0.762	1.77608e-08
Ube2d3	7.11634e-14	0.607593	0.933	0.89	1.51101e-09
Rpsa	7.54341e-10	0.607368	0.994	0.972	1.60169e-05
Plscr2	2.38845e-10	0.607262	0.667	0.483	5.0714e-06
Ppib	1.1332e-10	0.607104	0.893	0.84	2.40613e-06
Tspan4	1.69484e-15	0.606839	0.725	0.571	3.59865e-11
Cyp4b1	5.24014e-12	0.606767	0.693	0.519	1.11264e-07
Srsf5	3.00683e-13	0.606062	0.928	0.874	6.3844e-09
Hspe1	1.75093e-11	0.605391	0.707	0.583	3.71776e-07
Rtl8a	1.63266e-13	0.605219	0.771	0.587	3.46664e-09
Ndufa1	8.18913e-14	0.605166	0.82	0.675	1.7388e-09
Capns1	1.20945e-12	0.604642	0.884	0.822	2.56802e-08
Akap12	3.01817e-08	0.604287	0.762	0.655	0.000640847
Dad1	1.92496e-11	0.603923	0.841	0.764	4.08728e-07
Pnrc1	1.47819e-09	0.601452	0.87	0.828	3.13864e-05
Clec14a	3.02084e-11	0.601383	0.699	0.545	6.41414e-07
Magoh	2.33212e-15	0.601088	0.704	0.485	4.9518e-11
Slc50a1	6.84921e-15	0.600708	0.754	0.605	1.45429e-10
Stt3a	3.60762e-16	0.600588	0.603	0.397	7.66005e-12
Myadm	2.90221e-11	0.600542	0.904	0.872	6.16225e-07
Pfn1	1.76955e-09	0.599883	0.928	0.896	3.75728e-05
Pdia3	6.16703e-12	0.599196	0.878	0.828	1.30945e-07
Rap1b	5.66891e-11	0.598481	0.904	0.79	1.20368e-06
Eif1a	1.01831e-13	0.596212	0.707	0.497	2.16218e-09
Hnrnpk	3.02485e-13	0.596064	0.922	0.856	6.42266e-09
Gadd45b	9.75511e-09	0.595789	0.707	0.523	0.00020713
Oaz1	2.10254e-10	0.594383	0.951	0.89	4.46433e-06
Ywhaz	2.28683e-12	0.593736	0.916	0.818	4.85563e-08
Mafk	4.56481e-15	0.593633	0.612	0.399	9.69246e-11
Smdt1	1.41373e-12	0.592922	0.852	0.79	3.00178e-08
Rplp1	1.31784e-10	0.592519	0.997	0.994	2.79817e-06
Atp5mpl	3.31131e-13	0.592411	0.768	0.677	7.0309e-09
Plscr1	1.07782e-12	0.59215	0.609	0.421	2.28853e-08
Rer1	3.54128e-14	0.591871	0.765	0.611	7.51919e-10
Arpc3	1.7677e-11	0.591868	0.959	0.916	3.75337e-07
Sbno2	1.84652e-07	0.591852	0.806	0.689	0.00392072
Manf	2.49268e-12	0.590869	0.751	0.583	5.29271e-08
Atp5k	3.95218e-13	0.590606	0.849	0.81	8.39165e-09
Tnfsf9	1.83212e-07	0.589821	0.391	0.285	0.00389015
Swi5	2.90671e-13	0.589279	0.788	0.651	6.17183e-09
Ier2	1.81944e-08	0.58908	0.933	0.898	0.000386322
Arpc1b	1.35491e-09	0.588952	0.916	0.9	2.87689e-05
Rpl3	2.11444e-09	0.587813	0.957	0.952	4.48959e-05
Ybx1	3.60843e-11	0.583428	0.991	0.984	7.66179e-07
Smad6	1.36981e-14	0.583367	0.42	0.212	2.90851e-10
Jun	1.28239e-08	0.582951	0.977	0.962	0.00027229
Pttg1ip	2.92671e-16	0.581967	0.78	0.625	6.21429e-12
Calm2	5.16703e-11	0.580907	0.907	0.858	1.09712e-06
Wsb1	2.53328e-11	0.580872	0.713	0.547	5.3789e-07
Rpn2	1.03944e-14	0.57996	0.73	0.583	2.20704e-10
Rab11a	1.2485e-13	0.579774	0.899	0.798	2.65095e-09
Txn1	2.56336e-10	0.579545	0.899	0.848	5.44278e-06
Ppia	7.52235e-10	0.579369	0.974	0.98	1.59722e-05
Dph3	2.29612e-14	0.579365	0.661	0.495	4.87535e-10
Ftl1	8.22835e-10	0.579292	0.986	0.978	1.74712e-05
Tpm1	1.02426e-12	0.57842	0.858	0.778	2.17482e-08
Myl12b	4.35299e-12	0.578356	0.916	0.886	9.2427e-08
Cish	8.94033e-16	0.578058	0.478	0.295	1.8983e-11
Atp5b	5.27376e-12	0.577998	0.928	0.89	1.11978e-07
Ran	3.68461e-10	0.577019	0.774	0.747	7.82353e-06
Tuba1c	2.2442e-13	0.576196	0.42	0.22	4.76511e-09
Rplp2	1.04169e-10	0.575654	0.986	0.98	2.21183e-06
Hypk	8.86623e-18	0.574968	0.51	0.291	1.88257e-13
Cox5b	1.61391e-11	0.574809	0.881	0.85	3.42682e-07
Esam	1.41662e-11	0.572508	0.954	0.944	3.0079e-07
Cdc42ep4	1.03814e-14	0.571925	0.614	0.371	2.20429e-10
Kti12	8.13622e-12	0.571291	0.606	0.413	1.72756e-07
Rpl12	1.35862e-09	0.570767	0.983	0.976	2.88475e-05
Tmem176b	1.55068e-06	0.569163	0.452	0.309	0.0329257
Elob	4.44755e-11	0.568642	0.928	0.902	9.44348e-07
Tmem59	1.255e-12	0.568309	0.893	0.836	2.66474e-08
Ndufb1-ps	2.44281e-12	0.56797	0.867	0.794	5.18682e-08
Smim7	6.27519e-15	0.567901	0.606	0.413	1.33241e-10
Atp5j2	1.24754e-12	0.567864	0.933	0.908	2.64891e-08
Shisa5	2.41123e-12	0.567821	0.841	0.713	5.11976e-08
Pcna	7.52727e-12	0.566979	0.748	0.575	1.59826e-07
Arpc2	2.81234e-10	0.566646	0.945	0.888	5.97144e-06
Srsf2	1.25036e-11	0.565452	0.884	0.786	2.65489e-07
Myl3	4.66018e-13	0.565327	0.452	0.222	9.89495e-09
Ddit4	1.54289e-11	0.564744	0.496	0.325	3.27601e-07
Eef1a1	4.21675e-09	0.564679	1	0.998	8.95343e-05
Hsp90ab1	6.50744e-10	0.56451	0.983	0.99	1.38172e-05
Tceal9	3.20487e-09	0.564127	0.675	0.539	6.8049e-05
Nop58	2.01921e-11	0.563187	0.603	0.461	4.2874e-07
Hilpda	6.65338e-12	0.562965	0.272	0.152	1.41271e-07
Lamp1	2.78897e-11	0.562741	0.904	0.834	5.92183e-07
Anxa7	1.52506e-13	0.561899	0.757	0.627	3.23816e-09
Il4ra	4.13641e-10	0.561664	0.675	0.539	8.78285e-06
Rps6	2.32463e-09	0.560969	0.974	0.964	4.93589e-05
Park7	1.42132e-11	0.560278	0.817	0.705	3.01789e-07
Tmsb4x	1.5245e-09	0.559389	1	1	3.23698e-05
Fis1	9.09204e-12	0.559092	0.78	0.647	1.93051e-07
Egr1	5.34205e-07	0.558626	0.951	0.934	0.0113428
Sec13	4.34502e-15	0.557979	0.551	0.377	9.22578e-11
Tmbim6	1.29528e-12	0.5577	0.922	0.88	2.75026e-08
Sub1	4.78984e-11	0.556446	0.843	0.715	1.01703e-06
Banf1	8.85471e-11	0.556444	0.658	0.507	1.88012e-06
Atp6v0c	4.03511e-11	0.55635	0.884	0.792	8.56775e-07
Sar1a	4.14431e-14	0.555644	0.759	0.619	8.7996e-10
Spcs2	1.9724e-13	0.555527	0.788	0.633	4.188e-09
Hnrnpa3	5.40387e-11	0.554963	0.887	0.88	1.1474e-06
Rpl38	2.69742e-10	0.554799	0.991	0.99	5.72744e-06
Serf2	1.96612e-09	0.554233	0.962	0.944	4.17466e-05
Ppp1r15a	1.85473e-07	0.55334	0.823	0.741	0.00393814
Bcl10	4.83456e-12	0.553315	0.707	0.543	1.02652e-07
Gimap6	4.13892e-11	0.553115	0.919	0.886	8.78816e-07
Atp5l	2.51404e-10	0.551249	0.939	0.884	5.33806e-06
Tcim	2.5991e-10	0.550838	0.919	0.898	5.51867e-06
Cox5a	1.3815e-10	0.550306	0.867	0.82	2.93335e-06
Arf6	2.51027e-15	0.549665	0.667	0.483	5.33007e-11
Gm26532	7.01009e-11	0.549462	0.591	0.411	1.48845e-06
Pln	5.93913e-17	0.549177	0.368	0.144	1.26106e-12
Tprgl	2.65867e-11	0.548707	0.829	0.725	5.64514e-07
Actn4	5.22846e-10	0.548528	0.919	0.878	1.11016e-05
Ifi27	3.1065e-10	0.547804	0.846	0.739	6.59603e-06
Thbd	6.30445e-09	0.547719	0.78	0.685	0.000133862
Pomp	1.33726e-09	0.54744	0.82	0.756	2.8394e-05
Cox7c	2.49965e-10	0.546484	0.939	0.908	5.3075e-06
Cd300lg	1.2229e-11	0.545986	0.939	0.91	2.59658e-07
Atp5md	1.8004e-11	0.54485	0.832	0.752	3.82278e-07
Plekho2	2.83459e-11	0.544554	0.6	0.447	6.01868e-07
Rac1	5.67967e-11	0.544095	0.939	0.872	1.20596e-06
Taf7	2.10872e-11	0.543759	0.736	0.543	4.47744e-07
Atp5e	6.44857e-10	0.543619	0.942	0.924	1.36922e-05
Sdcbp	9.56335e-10	0.543598	0.904	0.828	2.03059e-05
Uqcr11	3.4448e-11	0.543475	0.907	0.828	7.31434e-07
Rps25	8.47633e-10	0.542807	0.974	0.974	1.79978e-05
Tpt1	1.57269e-09	0.541571	1	1	3.33928e-05
Ywhae	5.00747e-11	0.541549	0.893	0.9	1.06324e-06
Alyref	1.51894e-12	0.541349	0.649	0.499	3.22517e-08
Chmp5	1.65139e-12	0.540558	0.777	0.631	3.50639e-08
Plp2	3.37145e-12	0.540231	0.49	0.287	7.1586e-08
Gnas	2.37018e-10	0.5402	0.994	0.992	5.03261e-06
Rassf1	9.48837e-11	0.538138	0.812	0.675	2.01467e-06
Coq10b	9.20092e-12	0.537867	0.667	0.529	1.95363e-07
Tmem256	2.32725e-09	0.537642	0.8	0.721	4.94145e-05
Arc	1.87863e-10	0.537053	0.328	0.124	3.98889e-06
Eif2s2	8.71216e-10	0.536515	0.843	0.806	1.84985e-05
Anxa3	1.71691e-09	0.536106	0.826	0.78	3.64551e-05
Cr1l	2.24904e-12	0.534554	0.812	0.651	4.77539e-08
Lrrc59	3.45971e-12	0.534116	0.583	0.413	7.34601e-08
Atp5h	2.94585e-10	0.533919	0.899	0.89	6.25492e-06
Npdc1	4.16452e-10	0.533669	0.696	0.569	8.84252e-06
Sik1	2.93814e-09	0.532443	0.736	0.589	6.23854e-05
Rps26	1.62413e-10	0.531759	0.977	0.982	3.44852e-06
Igfbp7	1.78044e-06	0.531547	0.994	0.974	0.037804
Ndufb3	6.89433e-12	0.531244	0.757	0.613	1.46387e-07
Ier5l	6.33443e-07	0.531135	0.861	0.812	0.0134499
Jmjd6	6.52024e-13	0.530929	0.646	0.509	1.38444e-08
Rbx1	6.97611e-11	0.530928	0.872	0.814	1.48124e-06
Snx3	9.63648e-10	0.530348	0.887	0.792	2.04611e-05
Ndufa3	3.53952e-12	0.529449	0.832	0.691	7.51546e-08
Pdia6	3.13097e-09	0.528965	0.809	0.725	6.64798e-05
S100a16	1.7509e-10	0.528906	0.901	0.846	3.71768e-06
Cmpk1	5.08672e-12	0.528194	0.67	0.527	1.08006e-07
Atp5a1	2.66296e-09	0.528152	0.835	0.794	5.65426e-05
Ssbp4	1.3478e-10	0.527819	0.762	0.609	2.86178e-06
Eif6	6.04982e-11	0.527408	0.725	0.585	1.28456e-06
Tmem109	1.71566e-13	0.527004	0.725	0.575	3.64286e-09
Eng	6.18145e-09	0.526724	0.954	0.956	0.000131251
Ubl5	2.93731e-10	0.526256	0.852	0.818	6.23678e-06
Sh3bgrl3	2.12991e-08	0.525767	0.922	0.866	0.000452244
Cavin3	1.58698e-06	0.525319	0.826	0.76	0.0336963
Pofut2	1.48408e-13	0.52487	0.516	0.343	3.15115e-09
Nucb1	6.6802e-13	0.524451	0.713	0.601	1.41841e-08
Rpl4	1.33075e-08	0.52434	0.959	0.936	0.000282558
Tspan13	7.01757e-11	0.524152	0.959	0.934	1.49004e-06
Atp5j	1.36744e-10	0.52375	0.957	0.942	2.90348e-06
Fas	2.06967e-12	0.523303	0.643	0.475	4.39453e-08
Vasp	5.97231e-10	0.523269	0.725	0.629	1.2681e-05
Ppp1r18	1.67457e-12	0.522684	0.623	0.435	3.55562e-08
Chmp4b	5.8751e-09	0.522501	0.791	0.617	0.000124746
Hnrnpa0	6.59969e-10	0.522459	0.875	0.824	1.40131e-05
Psmb3	1.5114e-10	0.521681	0.791	0.705	3.20915e-06
Atp5g1	4.37653e-09	0.521334	0.803	0.752	9.29269e-05
Cox4i1	1.02659e-09	0.521065	0.945	0.938	2.17976e-05
Rpl21	3.08041e-09	0.520598	0.986	0.986	6.54063e-05
Zc3h12a	6.37582e-11	0.520569	0.536	0.389	1.35378e-06
Plk3	1.31728e-12	0.520555	0.588	0.403	2.79699e-08
Hprt	9.09571e-12	0.520433	0.649	0.485	1.93129e-07
Sf3b5	3.32706e-11	0.520282	0.646	0.455	7.06435e-07
Pgk1	1.6106e-09	0.519953	0.684	0.477	3.41979e-05
Tmem14c	2.09353e-10	0.519813	0.733	0.637	4.44518e-06
Rheb	8.25381e-11	0.518876	0.745	0.643	1.75253e-06
Gja1	8.72413e-08	0.518657	0.742	0.595	0.00185239
Mt2	5.99183e-08	0.518549	0.243	0.146	0.00127224
Hnrnpa2b1	2.08545e-10	0.518349	0.933	0.896	4.42805e-06
Serinc3	1.81049e-11	0.518221	0.959	0.936	3.84422e-07
Ift20	1.04062e-11	0.517601	0.649	0.499	2.20954e-07
Actc1	1.80123e-11	0.51713	0.386	0.206	3.82456e-07
Spcs1	1.93554e-11	0.516776	0.719	0.565	4.10973e-07
Cracr2b	1.75646e-10	0.515874	0.757	0.571	3.72949e-06
Pls3	5.7296e-10	0.515861	0.835	0.77	1.21656e-05
Morf4l1	4.53347e-11	0.514962	0.928	0.898	9.62591e-07
Pdcd6	7.3261e-12	0.514956	0.728	0.555	1.55555e-07
Gnai2	1.54939e-08	0.514675	0.986	0.976	0.000328982
Tsc22d1	6.01349e-08	0.513574	0.806	0.711	0.00127684
Lpl	1.41823e-07	0.513345	0.913	0.858	0.00301134
Arpc4	1.77961e-10	0.512336	0.719	0.583	3.77864e-06
Rexo2	2.10988e-09	0.512115	0.719	0.575	4.47991e-05
Cetn3	4.27609e-11	0.512083	0.667	0.489	9.07942e-07
Sec61b	1.67584e-08	0.51175	0.777	0.721	0.00035583
Rab5c	8.26541e-11	0.511083	0.849	0.762	1.755e-06
Rpl7a	5.03778e-08	0.510936	0.977	0.95	0.00106967
Plpp1	5.58005e-09	0.510736	0.838	0.729	0.000118481
Bsg	5.30543e-08	0.510601	0.89	0.82	0.0011265
Ndufa5	7.53714e-12	0.510523	0.78	0.643	1.60036e-07
Ndufa7	1.20876e-09	0.508209	0.861	0.778	2.56656e-05
Pde12	3.87871e-08	0.506998	0.626	0.509	0.000823566
Rpl9	1.83917e-07	0.506934	0.977	0.974	0.00390511
Ndufa13	3.27262e-10	0.506775	0.884	0.794	6.94875e-06
Sypl	6.79156e-13	0.505265	0.812	0.679	1.44205e-08
Dazap2	1.07607e-10	0.505003	0.791	0.669	2.28482e-06
Srp14	4.32466e-10	0.504247	0.791	0.663	9.18255e-06
Wdr83os	1.48722e-10	0.503789	0.623	0.537	3.15781e-06
Eif4a3	2.56409e-12	0.503359	0.643	0.507	5.44434e-08
Ndufb7	1.1692e-10	0.50295	0.858	0.788	2.48256e-06
Lrrc32	2.40664e-10	0.502161	0.386	0.206	5.11001e-06
Crlf2	8.55369e-10	0.502016	0.693	0.573	1.8162e-05
Rps18	2.11976e-07	0.501369	0.962	0.984	0.00450089
Ciao2b	5.51891e-12	0.500735	0.661	0.497	1.17183e-07
Pole4	5.66099e-13	0.500688	0.438	0.257	1.202e-08
Mdh2	2.23883e-10	0.500143	0.777	0.679	4.75371e-06
S100a13	1.74737e-09	0.500041	0.93	0.914	3.71018e-05
Psmb1	8.75072e-09	0.499909	0.838	0.739	0.000185804
Dync1i2	1.6935e-10	0.499896	0.771	0.639	3.59581e-06
Pabpc1	6.04933e-09	0.497811	0.93	0.856	0.000128445
Aco2	1.72246e-12	0.497487	0.638	0.477	3.65731e-08
Tmed5	4.40614e-10	0.496962	0.806	0.703	9.35556e-06
Stk25	1.80839e-14	0.496958	0.586	0.379	3.83975e-10
Cdk2ap1	1.86405e-13	0.496241	0.467	0.246	3.95795e-09
Raly	3.10254e-10	0.49624	0.817	0.711	6.58763e-06
Slc25a4	6.75441e-09	0.49466	0.893	0.79	0.000143416
Timm10b	5.72574e-07	0.494616	0.722	0.635	0.0121575
Mapk3	1.63387e-09	0.494591	0.861	0.802	3.46919e-05
Tnfsf12	8.92355e-12	0.494496	0.638	0.511	1.89474e-07
Psmd8	4.18235e-09	0.494433	0.774	0.649	8.88039e-05
Slc25a3	5.91898e-08	0.493731	0.887	0.852	0.00125678
Gpx4	7.8712e-09	0.493677	0.945	0.888	0.000167129
Tmem176a	8.63159e-07	0.493643	0.328	0.212	0.0183274
Ndufb8	3.73333e-10	0.492534	0.835	0.743	7.92697e-06
Calm1	9.19699e-09	0.492454	0.994	0.982	0.00019528
Egfl7	1.08719e-08	0.492444	0.988	0.97	0.000230843
Sec22b	1.68417e-14	0.492337	0.481	0.283	3.57601e-10
BC031181	5.68607e-12	0.492286	0.725	0.539	1.20732e-07
Ostc	1.07306e-10	0.491536	0.641	0.449	2.27843e-06
Cct2	7.36446e-09	0.491437	0.768	0.627	0.000156369
Copb1	5.13136e-12	0.491432	0.614	0.457	1.08954e-07
Ube2s	1.27251e-08	0.491408	0.82	0.729	0.000270193
Bola3	5.70811e-13	0.490318	0.594	0.405	1.212e-08
Nol7	4.5513e-10	0.489799	0.823	0.681	9.66377e-06
H3f3a	3.26973e-08	0.489624	0.977	0.962	0.000694263
Fkbp2	2.98062e-10	0.488444	0.519	0.347	6.32876e-06
Serbp1	4.26446e-08	0.487549	0.881	0.856	0.000905473
Palmd	2.73246e-09	0.487408	0.809	0.764	5.80183e-05
Chmp3	7.78999e-13	0.487223	0.722	0.581	1.65405e-08
Dpm3	4.61548e-10	0.486936	0.728	0.647	9.80004e-06
Prdx1	1.43798e-07	0.486057	0.904	0.87	0.00305326
Ptms	4.32816e-08	0.485966	0.91	0.894	0.000918999
Taf10	2.02208e-08	0.48587	0.777	0.685	0.000429349
Cst3	3.66569e-08	0.485358	0.965	0.944	0.000778336
D8Ertd738e	6.34543e-10	0.485138	0.875	0.802	1.34733e-05
Rps27a	4.11909e-07	0.485138	0.986	0.984	0.00874607
Btf3	1.22492e-07	0.48481	0.925	0.908	0.00260087
Taldo1	4.29742e-08	0.48469	0.73	0.601	0.000912472
Gpx1	5.72626e-07	0.4843	0.87	0.798	0.0121586
Atp5o	2.23041e-09	0.483982	0.826	0.743	4.73582e-05
Impdh2	9.76892e-11	0.4838	0.614	0.469	2.07423e-06
Nsmce1	2.82519e-10	0.483792	0.632	0.487	5.99872e-06
Gcc1	1.75513e-11	0.483778	0.58	0.353	3.72667e-07
Brd2	1.17306e-08	0.483731	0.849	0.774	0.000249077
Anapc5	9.89868e-11	0.483621	0.725	0.601	2.10179e-06
Psma3	5.12824e-09	0.482287	0.814	0.764	0.000108888
Csrp1	3.11228e-07	0.481963	0.786	0.709	0.0066083
Snrpf	2.77504e-08	0.48159	0.739	0.643	0.000589223
Anp32b	2.7087e-08	0.480796	0.788	0.697	0.000575138
Tnfrsf1a	9.03211e-09	0.480637	0.82	0.723	0.000191779
Mrps28	4.92194e-11	0.479633	0.501	0.353	1.04508e-06
Srgn	4.12825e-08	0.478898	0.93	0.924	0.000876552
Prdx4	2.30593e-07	0.478672	0.554	0.433	0.00489617
Smpdl3a	6.65492e-09	0.478245	0.672	0.545	0.000141304
Nme1	1.44774e-07	0.477707	0.623	0.553	0.003074
Btg3	3.45869e-10	0.476723	0.652	0.507	7.34384e-06
Tmem258	9.38045e-10	0.475965	0.696	0.549	1.99175e-05
Yif1a	3.40939e-13	0.47586	0.475	0.291	7.23915e-09
Copa	1.5461e-09	0.47586	0.675	0.559	3.28282e-05
Tmem173	4.91957e-10	0.475581	0.525	0.381	1.04457e-05
Rnf7	1.26262e-09	0.475181	0.733	0.555	2.68093e-05
Pim1	1.06711e-06	0.475164	0.565	0.467	0.022658
Snrpg	6.9484e-08	0.475154	0.861	0.826	0.00147535
Gimap4	1.6242e-08	0.474958	0.835	0.749	0.000344865
Strap	5.32754e-11	0.474946	0.675	0.475	1.1312e-06
Slc39a1	1.20675e-11	0.47466	0.588	0.447	2.56229e-07
Rpl14	4.35496e-07	0.474163	0.962	0.964	0.0092469
Sem1	1.31289e-07	0.473667	0.951	0.902	0.00278765
Mall	6.43598e-09	0.4726	0.548	0.399	0.000136655
Ckb	1.78019e-07	0.471225	0.565	0.487	0.00377989
Map1lc3b	1.53339e-08	0.471093	0.907	0.876	0.000325585
Chmp2a	1.59064e-09	0.470975	0.846	0.798	3.3774e-05
Bcam	1.01176e-07	0.469742	0.841	0.743	0.00214826
Gpr146	3.83539e-10	0.469512	0.649	0.493	8.14369e-06
Mrpl54	5.82851e-10	0.469173	0.551	0.385	1.23757e-05
Aqp7	2.39069e-08	0.469118	0.719	0.607	0.000507615
Rps12	1.30062e-07	0.468991	0.997	0.996	0.00276162
Bcar1	6.72668e-12	0.468941	0.58	0.427	1.42828e-07
Serinc1	7.5228e-11	0.46852	0.762	0.669	1.59732e-06
Rps5	1.18133e-06	0.468515	0.991	0.98	0.0250833
Spty2d1	4.95184e-11	0.468388	0.609	0.433	1.05143e-06
Anapc13	4.59997e-11	0.468003	0.571	0.411	9.76711e-07
Slc25a25	4.48503e-09	0.467612	0.513	0.373	9.52307e-05
Erh	2.16423e-08	0.467507	0.594	0.469	0.000459531
Rpl29	9.67658e-07	0.467298	0.968	0.96	0.0205463
Arf5	9.89192e-08	0.467014	0.907	0.818	0.00210035
Ucp2	1.9883e-08	0.466457	0.696	0.511	0.000422176
Txn2	1.58372e-09	0.465858	0.583	0.437	3.36272e-05
Atp5g3	7.59665e-09	0.465723	0.786	0.673	0.0001613
Atp6v0e	7.52093e-09	0.465689	0.794	0.723	0.000159692
Rps3a1	6.99518e-07	0.465521	0.991	0.978	0.0148529
Ndufb9	4.19119e-09	0.465175	0.855	0.778	8.89916e-05
Atp5g2	8.74527e-07	0.464501	0.872	0.8	0.0185688
Psenen	1.01429e-08	0.464482	0.71	0.595	0.000215363
Pmp22	1.68384e-09	0.464218	0.565	0.397	3.5753e-05
Ndufc2	1.39304e-08	0.464184	0.849	0.778	0.000295784
Npm1	1.79347e-06	0.463995	0.87	0.806	0.0380807
Krcc1	1.89038e-10	0.463206	0.655	0.457	4.01385e-06
2310039H08Rik	3.60979e-13	0.462275	0.417	0.226	7.66467e-09
Selenop	5.68046e-08	0.461919	0.849	0.804	0.00120613
Sdhb	1.09317e-09	0.461847	0.652	0.539	2.32114e-05
Jam2	3.59688e-10	0.460199	0.907	0.88	7.63726e-06
Acbd3	3.09952e-11	0.460168	0.597	0.461	6.58121e-07
Pcp4l1	1.96433e-07	0.459759	0.333	0.202	0.00417085
Vdac2	4.52239e-08	0.459406	0.768	0.641	0.000960239
Ndufs5	4.15649e-09	0.458698	0.849	0.81	8.82548e-05
Dda1	5.99064e-12	0.458543	0.525	0.349	1.27199e-07
Dnajb6	9.01833e-08	0.458443	0.794	0.699	0.00191486
Iscu	2.98753e-12	0.457944	0.675	0.487	6.34342e-08
Sri	7.01121e-08	0.457217	0.786	0.713	0.00148869
Atp6v1g1	9.84268e-09	0.456912	0.829	0.719	0.00020899
Adcy4	7.14545e-09	0.456555	0.739	0.627	0.000151719
Pcf11	2.20838e-09	0.456093	0.661	0.531	4.68905e-05
Ostf1	5.99602e-08	0.455938	0.881	0.786	0.00127314
Unc45b	8.7367e-10	0.455346	0.881	0.818	1.85506e-05
Bcap31	4.03438e-10	0.455174	0.716	0.573	8.56619e-06
Ilk	4.01024e-09	0.455058	0.696	0.599	8.51493e-05
Atp5f1	3.83747e-08	0.45481	0.841	0.764	0.000814809
Rpl8	7.53846e-07	0.45478	0.988	0.98	0.0160064
Eef1g	2.17003e-07	0.454657	0.884	0.82	0.00460763
Ptbp1	4.00284e-10	0.454441	0.696	0.583	8.49924e-06
Sdf4	1.07151e-09	0.454441	0.762	0.653	2.27513e-05
Pgam1	3.56404e-08	0.453969	0.646	0.477	0.000756752
Rpl5	6.84953e-07	0.453787	0.959	0.964	0.0145436
Ndufab1	1.59698e-08	0.453646	0.667	0.563	0.000339086
Ndufs2	3.45117e-09	0.453526	0.667	0.541	7.32787e-05
Srsf7	4.37221e-08	0.452467	0.843	0.766	0.000928352
Cdc42	5.52771e-08	0.452184	0.93	0.914	0.0011737
Ddost	4.45833e-09	0.451978	0.62	0.507	9.46638e-05
Ranbp1	6.49642e-08	0.451097	0.748	0.659	0.00137938
Rras	3.54724e-08	0.450854	0.887	0.838	0.000753186
Tle5	7.98645e-08	0.450232	0.928	0.89	0.00169576
Ppp1ca	9.45509e-08	0.449846	0.849	0.766	0.0020076
Ncl	6.23406e-08	0.449748	0.91	0.862	0.00132368
Pfdn5	3.87132e-08	0.449721	0.954	0.912	0.000821997
Nfe2l1	1.58185e-08	0.4497	0.797	0.693	0.000335874
Tmed10	5.86262e-08	0.449675	0.829	0.814	0.00124481
Uqcr10	2.22013e-08	0.449393	0.861	0.786	0.0004714
Mb	2.61068e-08	0.449115	0.464	0.331	0.000554325
Ywhaq	1.18497e-07	0.448911	0.855	0.79	0.00251605
Micos10	8.3469e-08	0.44887	0.783	0.705	0.0017723
Yipf5	3.46172e-10	0.448303	0.496	0.315	7.35026e-06
Jdp2	3.74986e-11	0.448297	0.449	0.285	7.96207e-07
Akr1a1	1.14599e-07	0.447973	0.838	0.816	0.00243329
Ddrgk1	1.11719e-10	0.447866	0.751	0.589	2.37212e-06
Vps29	3.40352e-09	0.447633	0.719	0.575	7.22669e-05
Icam2	9.61565e-08	0.447352	0.919	0.894	0.00204169
Emc10	1.28381e-08	0.447098	0.707	0.591	0.000272591
Irx3	2.35508e-14	0.447084	0.261	0.096	5.00054e-10
4930523C07Rik	5.47458e-09	0.446182	0.713	0.643	0.000116242
Cox7b	1.84394e-07	0.44556	0.829	0.727	0.00391524
Rpl36	9.25882e-07	0.445444	0.991	0.978	0.0196593
Sema4c	6.37863e-10	0.445091	0.536	0.383	1.35437e-05
Sqstm1	1.39396e-06	0.444981	0.745	0.603	0.029598
Cd47	2.29456e-08	0.444743	0.852	0.808	0.000487203
Zrsr2	5.66031e-10	0.444352	0.58	0.429	1.20185e-05
Gm12840	4.76061e-09	0.443634	0.278	0.12	0.000101082
Yif1b	3.03216e-10	0.44335	0.6	0.467	6.43819e-06
Atf5	3.94355e-09	0.443084	0.348	0.224	8.37334e-05
Ndufb2	1.47857e-08	0.442741	0.684	0.585	0.000313946
Chchd1	1.41793e-09	0.442454	0.583	0.437	3.01068e-05
Lsm6	4.90371e-09	0.441813	0.617	0.505	0.00010412
Actr3	1.40567e-07	0.441338	0.78	0.693	0.00298467
Ewsr1	2.0631e-09	0.441296	0.696	0.611	4.38057e-05
Naa38	1.45729e-11	0.441261	0.638	0.479	3.09426e-07
Ergic3	3.39054e-10	0.440434	0.603	0.441	7.19913e-06
Drap1	9.7107e-09	0.440325	0.78	0.695	0.000206187
Lrrc8a	3.73557e-09	0.440234	0.812	0.669	7.93175e-05
Adam15	3.67981e-07	0.439956	0.861	0.828	0.00781334
Rab7	9.85875e-09	0.4399	0.814	0.741	0.000209331
Ppp1r11	7.90376e-08	0.439794	0.725	0.605	0.00167821
Tra2b	1.54429e-07	0.439784	0.846	0.806	0.003279
Scp2	6.94226e-09	0.439728	0.757	0.609	0.000147405
Tubb5	2.16276e-06	0.439639	0.904	0.872	0.0459218
St13	2.27924e-08	0.439551	0.736	0.663	0.00048395
Eif4a2	6.99896e-09	0.439271	0.835	0.721	0.000148609
Arl6ip5	1.05979e-07	0.439244	0.646	0.525	0.00225025
Mydgf	5.53526e-09	0.439047	0.646	0.523	0.00011753
Ddx50	1.00834e-08	0.4384	0.722	0.635	0.0002141
Cox17	1.25811e-08	0.438129	0.82	0.719	0.000267135
Psmb2	1.08903e-07	0.438116	0.742	0.635	0.00231234
Trir	1.06454e-07	0.437286	0.771	0.723	0.00226033
Slfn5	7.89106e-07	0.437252	0.951	0.93	0.0167551
Rpl37	2.00478e-06	0.436299	0.994	0.992	0.0425675
Cryab	1.63449e-13	0.436146	0.357	0.162	3.47051e-09
Syf2	9.82739e-10	0.435853	0.788	0.687	2.08665e-05
Cops9	2.6871e-08	0.43571	0.742	0.617	0.000570552
Ndufv3	4.33736e-09	0.435565	0.728	0.631	9.20951e-05
Hnrnpdl	6.11127e-08	0.435176	0.684	0.577	0.00129761
Ywhab	2.46141e-07	0.434583	0.841	0.784	0.00522632
Sema3f	1.94393e-06	0.433759	0.635	0.553	0.0412756
Sec62	9.58945e-09	0.433714	0.907	0.89	0.000203613
Eif4ebp1	2.53404e-07	0.433281	0.487	0.347	0.00538052
Ubxn6	4.61216e-12	0.433035	0.623	0.393	9.79299e-08
Spry4	2.21697e-07	0.432448	0.536	0.395	0.00470728
Ndufa12	4.06279e-08	0.431357	0.722	0.603	0.000862653
Rap1a	3.14366e-08	0.431279	0.838	0.808	0.000667493
Dynlrb1	3.50847e-08	0.430973	0.806	0.733	0.000744953
P4hb	3.35956e-07	0.430589	0.757	0.677	0.00713335
Psma2	1.62309e-07	0.429684	0.736	0.705	0.0034463
Adgrg1	1.08812e-08	0.429624	0.872	0.834	0.00023104
Sec11a	4.43808e-09	0.429525	0.617	0.449	9.42337e-05
Vamp8	1.06201e-08	0.42944	0.739	0.615	0.000225496
Atp1a1	1.8388e-07	0.429099	0.777	0.699	0.00390432
Tmbim4	7.83937e-09	0.429024	0.646	0.505	0.000166453
Trip10	1.19188e-09	0.428803	0.583	0.449	2.53072e-05
Nedd8	5.95934e-07	0.428789	0.846	0.762	0.0126535
Plpp3	1.579e-06	0.428407	0.939	0.906	0.0335269
Eef1d	6.65282e-07	0.428395	0.78	0.731	0.0141259
Psmb6	7.68942e-08	0.428276	0.809	0.693	0.00163269
Dctn1	1.93039e-09	0.428142	0.67	0.535	4.0988e-05
Ercc1	4.24106e-08	0.427921	0.626	0.477	0.000900505
Degs1	1.83368e-09	0.427474	0.571	0.427	3.89346e-05
Cnbp	1.98859e-08	0.427448	0.913	0.844	0.000422237
Stub1	1.30986e-09	0.427448	0.699	0.545	2.78123e-05
Fam104a	7.02594e-08	0.42724	0.69	0.581	0.00149182
Sf3b1	9.83702e-08	0.427231	0.864	0.818	0.00208869
Slc38a2	1.24781e-06	0.427231	0.858	0.747	0.0264948
Mif	9.64283e-08	0.426778	0.757	0.655	0.00204746
Hspa9	1.80072e-08	0.426753	0.557	0.459	0.000382347
Ndufa11	8.69715e-09	0.426611	0.791	0.613	0.000184667
Ssr3	6.72408e-09	0.426453	0.629	0.493	0.000142772
Per1	1.60755e-11	0.426371	0.568	0.391	3.41331e-07
Ndufv2	6.76615e-09	0.426367	0.693	0.541	0.000143666
Pgrmc1	8.1236e-11	0.426293	0.701	0.555	1.72488e-06
Pebp1	1.25641e-07	0.425957	0.745	0.643	0.00266773
Abcg2	3.90118e-08	0.425621	0.707	0.611	0.000828338
Bzw1	9.50722e-08	0.425447	0.774	0.647	0.00201867
Mapre1	4.23102e-08	0.425179	0.823	0.723	0.000898372
Atp5c1	3.69818e-07	0.425149	0.835	0.754	0.00785234
Wdr1	2.77812e-08	0.42489	0.652	0.553	0.000589877
Calm3	1.41842e-07	0.424602	0.751	0.621	0.00301173
Cript	1.24744e-09	0.424436	0.632	0.473	2.64868e-05
Acp1	6.00697e-11	0.424407	0.47	0.253	1.27546e-06
Uqcrb	5.53152e-07	0.424031	0.91	0.88	0.0117451
Card19	2.07658e-08	0.423972	0.591	0.373	0.000440921
Eif3j1	1.04895e-08	0.423617	0.672	0.539	0.000222725
Psmb4	7.5157e-08	0.423544	0.8	0.758	0.00159581
Commd1	1.0598e-08	0.423364	0.635	0.499	0.000225028
Psmb5	3.01964e-07	0.42319	0.73	0.645	0.00641161
Cav1	1.39901e-06	0.422868	0.988	0.97	0.0297051
Polr2e	1.56011e-08	0.422694	0.739	0.629	0.000331257
Nop10	4.34244e-08	0.422324	0.661	0.557	0.00092203
Ndufb11	1.40865e-07	0.421811	0.82	0.762	0.00299099
Hmgb2	9.67545e-07	0.421747	0.687	0.561	0.0205439
Grcc10	1.00634e-07	0.421126	0.826	0.743	0.00213676
Txndc17	1.27252e-06	0.421106	0.751	0.693	0.0270195
Ahnak	3.3081e-07	0.420567	0.968	0.96	0.00702409
Wsb2	8.21489e-08	0.420426	0.577	0.455	0.00174427
Capzb	3.17433e-07	0.420382	0.814	0.792	0.00674005
Anapc11	2.73269e-09	0.419567	0.658	0.515	5.80232e-05
Creb3	7.18189e-11	0.419038	0.516	0.349	1.52493e-06
Tbca	3.03925e-07	0.419003	0.8	0.701	0.00645324
Dstn	2.11084e-07	0.418959	0.786	0.707	0.00448195
Polr2l	7.09987e-11	0.41882	0.493	0.287	1.50752e-06
Cops6	2.58732e-08	0.418507	0.661	0.523	0.000549366
BC005624	1.49022e-11	0.418129	0.603	0.443	3.16418e-07
Akt1	4.78087e-07	0.417936	0.748	0.627	0.0101512
Jpt1	7.41045e-07	0.417631	0.626	0.519	0.0157346
Cyb561	6.46134e-09	0.417601	0.47	0.331	0.000137194
Unc50	1.91963e-09	0.417579	0.522	0.355	4.07594e-05
Cenpx	2.66468e-09	0.417226	0.635	0.475	5.65792e-05
Tmem88	1.44337e-07	0.417121	0.901	0.854	0.00306471
Sumo2	8.73673e-07	0.417016	0.904	0.85	0.0185507
Cd36	5.08995e-07	0.416811	1	0.998	0.0108075
Psmd2	2.89645e-08	0.416471	0.623	0.487	0.000615003
Cnn3	8.22078e-07	0.416079	0.794	0.717	0.0174552
Rab1b	4.7354e-09	0.415556	0.632	0.481	0.000100547
Ube2m	1.5363e-07	0.415509	0.713	0.585	0.00326203
Coa3	7.25749e-09	0.415291	0.701	0.585	0.000154098
Hnrnpm	6.52977e-08	0.4152	0.762	0.655	0.00138647
Edf1	9.38637e-07	0.41514	0.829	0.77	0.0199301
Ssu72	4.29356e-08	0.413835	0.687	0.597	0.000911652
Tmem50a	5.21563e-08	0.413595	0.855	0.792	0.00110743
Ociad1	1.74406e-09	0.412523	0.583	0.413	3.70315e-05
Tnni3	1.12765e-08	0.412507	0.429	0.234	0.000239433
Fosl1	1.56736e-11	0.412261	0.261	0.082	3.32797e-07
Triobp	1.30698e-08	0.41221	0.704	0.515	0.000277511
Hnrnpd	1.41911e-07	0.412101	0.768	0.639	0.0030132
Vapa	5.09215e-07	0.411847	0.707	0.611	0.0108122
U2af1	4.41806e-08	0.411444	0.707	0.591	0.000938087
Xbp1	1.2558e-06	0.411115	0.67	0.553	0.0266643
Rsu1	7.69948e-07	0.410453	0.736	0.637	0.0163483
Bcl7b	5.55503e-11	0.409502	0.545	0.347	1.1795e-06
Srsf3	3.39805e-07	0.408686	0.867	0.804	0.00721508
Hsbp1	2.03327e-07	0.407662	0.757	0.695	0.00431725
Ube2i	1.02324e-06	0.406808	0.71	0.595	0.0217265
Idh2	5.43257e-09	0.406761	0.577	0.435	0.00011535
Pdgfb	8.06398e-07	0.406588	0.791	0.735	0.0171222
Scand1	3.72088e-07	0.406452	0.733	0.693	0.00790054
Arl4a	5.94284e-08	0.40618	0.568	0.425	0.00126184
Furin	1.10103e-08	0.405911	0.612	0.457	0.000233781
Hadhb	1.74309e-08	0.405531	0.542	0.415	0.000370111
Ptges3	1.39602e-07	0.405347	0.739	0.631	0.00296417
Dctn3	1.44722e-07	0.404644	0.725	0.625	0.00307289
Selenom	1.23076e-06	0.404393	0.812	0.749	0.0261328
S1pr1	2.02949e-06	0.404131	0.907	0.88	0.0430921
Tma7	1.7954e-06	0.404099	0.809	0.727	0.0381218
Eif3c	2.20814e-07	0.40308	0.814	0.778	0.00468854
Rab20	3.21831e-09	0.403012	0.31	0.13	6.83345e-05
Brk1	2.71778e-07	0.402652	0.78	0.689	0.00577066
Ndufa6	1.58332e-07	0.402643	0.817	0.729	0.00336187
Tax1bp1	2.72352e-07	0.401997	0.817	0.709	0.00578286
Tob1	1.8336e-06	0.401979	0.667	0.519	0.0389328
Pfdn1	4.39532e-08	0.401933	0.664	0.531	0.000933257
Vps28	8.54805e-08	0.401695	0.687	0.571	0.00181501
Cnih4	6.08462e-08	0.401541	0.652	0.515	0.00129195
Psma1	1.08442e-07	0.401458	0.658	0.555	0.00230255
Bag1	1.52791e-07	0.400943	0.791	0.657	0.00324421
Mpc2	2.93244e-08	0.400771	0.638	0.493	0.000622644
Txnl1	6.33879e-07	0.399749	0.704	0.541	0.0134592
Adipor1	2.23237e-07	0.399444	0.797	0.747	0.00473999
Copz2	3.2825e-09	0.399418	0.493	0.367	6.96972e-05
Ndufb4	1.33823e-07	0.398234	0.823	0.727	0.00284147
Sptssa	3.3696e-08	0.397068	0.661	0.535	0.000715467
Ctbp1	3.53685e-08	0.396846	0.67	0.565	0.00075098
Nap1l1	3.01947e-07	0.396788	0.701	0.585	0.00641123
Hnrnpab	1.6232e-06	0.396697	0.739	0.754	0.0344654
Sh3bgrl	1.30079e-06	0.396492	0.73	0.609	0.0276197
Rps27rt	5.13472e-13	0.396307	0.414	0.21	1.09025e-08
Pigp	2.13293e-09	0.396277	0.536	0.317	4.52886e-05
Polr2k	5.20034e-08	0.396109	0.623	0.521	0.00110419
Cwc15	5.4098e-08	0.396055	0.736	0.621	0.00114866
Ap2m1	9.56895e-07	0.395796	0.78	0.719	0.0203177
Rab18	3.00152e-08	0.39562	0.69	0.569	0.000637313
Pink1	8.39468e-09	0.395508	0.67	0.581	0.000178244
Dusp5	1.52233e-06	0.395303	0.455	0.303	0.0323235
Ddx39b	2.05844e-07	0.39494	0.655	0.555	0.00437069
Abracl	1.03028e-06	0.394669	0.649	0.523	0.021876
Snrpb	2.32032e-06	0.39459	0.878	0.812	0.0492674
Bnip3l	1.34928e-07	0.39404	0.809	0.687	0.00286494
Siva1	7.29093e-11	0.392977	0.423	0.242	1.54808e-06
Erp29	7.75127e-07	0.392824	0.687	0.577	0.0164583
Pdcd6ip	8.72853e-08	0.392777	0.754	0.661	0.00185333
Bcl7c	1.46556e-07	0.392719	0.606	0.505	0.00311183
Hsd17b12	1.16459e-09	0.392513	0.464	0.293	2.47277e-05
Vdac1	2.37724e-07	0.392332	0.559	0.431	0.00504759
Canx	1.22691e-06	0.392266	0.786	0.756	0.026051
Higd1a	1.06031e-06	0.392181	0.638	0.517	0.0225137
Ddx39	3.83791e-09	0.391267	0.438	0.281	8.14904e-05
Sdha	2.21492e-09	0.390821	0.603	0.455	4.70295e-05
Ube2v1	6.46475e-08	0.39055	0.725	0.645	0.00137266
Hspd1	3.05066e-07	0.390477	0.574	0.485	0.00647746
Rsrc2	3.84025e-07	0.390282	0.754	0.675	0.008154
Sec31a	6.72672e-07	0.390263	0.559	0.437	0.0142829
Snrpa1	1.47073e-07	0.389884	0.516	0.383	0.0031228
Ndufb6	2.66621e-08	0.389762	0.632	0.539	0.000566117
Rnf10	4.58136e-08	0.389597	0.696	0.575	0.000972759
Map3k6	1.45931e-11	0.388879	0.397	0.22	3.09856e-07
Pdap1	1.79498e-06	0.387781	0.751	0.677	0.0381127
Pak1ip1	7.79069e-08	0.387596	0.71	0.619	0.0016542
Uchl1	5.67646e-08	0.38735	0.33	0.192	0.00120528
Tbcb	8.38395e-07	0.386932	0.672	0.537	0.0178016
Acvrl1	4.41358e-07	0.386891	0.788	0.695	0.00937135
Mettl9	1.13439e-07	0.386824	0.597	0.463	0.00240866
Tcf25	1.57269e-07	0.386326	0.823	0.727	0.0033393
Tmem208	8.11729e-09	0.386105	0.548	0.419	0.000172354
Znrd1	1.44734e-07	0.386025	0.641	0.487	0.00307313
Psma5	1.73962e-06	0.385947	0.632	0.501	0.0369374
Tmem33	2.32861e-08	0.385871	0.472	0.351	0.000494434
Sap18	4.41331e-07	0.385783	0.713	0.561	0.00937077
Ndufs6	2.10138e-07	0.38537	0.759	0.685	0.00446186
Trappc6b	5.55429e-08	0.38528	0.62	0.511	0.00117934
Mpc1	2.85881e-08	0.384886	0.632	0.493	0.00060701
mt-Nd1	1.84091e-06	0.384781	0.991	0.99	0.0390881
Hnrnpu	7.46187e-07	0.384537	0.884	0.866	0.0158438
Nr1h2	2.36292e-08	0.383751	0.603	0.481	0.00050172
Psmb7	4.77125e-07	0.383434	0.684	0.535	0.0101308
Tgoln1	5.1311e-07	0.383408	0.751	0.711	0.0108949
Ube2n	5.89591e-07	0.382974	0.684	0.597	0.0125188
Emc7	4.19419e-07	0.382922	0.678	0.555	0.00890552
Dhrs7	2.70173e-09	0.382645	0.603	0.451	5.73659e-05
Psmc3	6.36117e-07	0.382015	0.748	0.671	0.0135067
Sema6b	1.10037e-07	0.381765	0.58	0.373	0.00233641
S100a9	6.00084e-13	0.38136	0.18	0.044	1.27416e-08
Cdkn2d	1.29601e-08	0.381326	0.438	0.321	0.000275182
Napa	9.90072e-08	0.380967	0.583	0.463	0.00210222
Fmc1	1.96072e-09	0.380654	0.49	0.341	4.16319e-05
Erp44	1.15646e-08	0.380638	0.542	0.397	0.000245552
Gtpbp4	5.81592e-08	0.380062	0.577	0.383	0.0012349
Ppa1	8.31846e-08	0.379987	0.406	0.267	0.00176626
Mrps18c	2.13028e-08	0.379748	0.614	0.513	0.000452323
Sirt2	3.58839e-08	0.379716	0.609	0.435	0.000761922
Aamp	9.85722e-08	0.379592	0.623	0.479	0.00209298
Fbxw2	4.75977e-08	0.379536	0.704	0.563	0.00101064
Rtl8b	3.59626e-07	0.378638	0.606	0.493	0.00763594
Rbm8a	3.46484e-07	0.378444	0.73	0.619	0.0073569
Cct3	1.08933e-06	0.378372	0.646	0.559	0.0231297
Purb	1.06652e-06	0.378359	0.867	0.82	0.0226453
Txndc12	1.12368e-07	0.378286	0.522	0.385	0.00238591
Selenos	1.18753e-07	0.377721	0.464	0.333	0.00252148
Serp1	3.54321e-09	0.377374	0.548	0.361	7.5233e-05
Csde1	6.63133e-07	0.377304	0.846	0.836	0.0140803
Taf1d	4.87837e-07	0.377294	0.638	0.499	0.0103582
Cdc37	1.8699e-06	0.377277	0.777	0.707	0.0397037
Ufm1	6.78898e-08	0.375886	0.545	0.421	0.0014415
Mbd3	1.31929e-07	0.374902	0.626	0.533	0.00280124
Pet100	1.24128e-07	0.374491	0.597	0.507	0.00263562
Saraf	6.02876e-07	0.373363	0.733	0.625	0.0128009
Eif2b2	2.13194e-08	0.373116	0.472	0.325	0.000452676
Cyth2	3.45288e-08	0.372924	0.597	0.461	0.000733149
Acsl5	1.18553e-08	0.372787	0.591	0.417	0.000251724
Tm9sf3	1.34551e-06	0.372448	0.771	0.715	0.0285691
Dnaja2	9.6159e-07	0.372366	0.67	0.559	0.0204174
Ndufs7	3.59981e-07	0.37236	0.687	0.597	0.00764348
Eif3d	1.63863e-07	0.371979	0.672	0.555	0.0034793
Atp6ap1	3.48376e-08	0.37109	0.583	0.429	0.000739706
Lman2	1.61563e-07	0.369959	0.652	0.503	0.00343047
Ctdnep1	1.20032e-06	0.369878	0.652	0.539	0.0254864
Son	4.6696e-07	0.369841	0.939	0.926	0.00991496
Tspan12	5.31589e-08	0.369424	0.658	0.525	0.00112872
Trappc4	4.94565e-07	0.367711	0.594	0.465	0.0105011
Pdia4	2.35502e-09	0.367159	0.533	0.383	5.00042e-05
Tspan17	3.8155e-09	0.36702	0.475	0.301	8.10145e-05
S100a8	3.28385e-12	0.366299	0.171	0.05	6.97259e-08
Fabp3	6.40543e-08	0.365665	0.403	0.242	0.00136007
Oat	1.6716e-08	0.365396	0.536	0.413	0.000354931
Map1lc3a	4.87524e-07	0.365261	0.652	0.547	0.0103516
Ech1	2.25344e-06	0.364987	0.725	0.623	0.0478473
Czib	4.72551e-09	0.364957	0.501	0.333	0.000100337
U2af2	8.04004e-08	0.364889	0.614	0.465	0.00170714
Capn2	2.22676e-07	0.364884	0.774	0.679	0.00472807
Asns	5.84569e-09	0.364294	0.299	0.168	0.000124122
Cyc1	1.76501e-06	0.363251	0.612	0.487	0.0374765
Nudc	5.38223e-07	0.362836	0.707	0.609	0.0114281
Mrpl27	5.2677e-08	0.362518	0.557	0.435	0.00111849
Sde2	5.19085e-08	0.362277	0.458	0.329	0.00110217
Ccdc124	2.71035e-07	0.362117	0.583	0.467	0.00575489
Mustn1	1.96751e-07	0.362022	0.438	0.287	0.00417762
Ssrp1	6.94266e-07	0.361933	0.58	0.471	0.0147414
Gt(ROSA)26Sor	1.07774e-12	0.361918	0.357	0.172	2.28836e-08
Hspa2	1.27907e-06	0.361531	0.594	0.429	0.0271586
Prdx6	1.23974e-06	0.361479	0.53	0.423	0.0263235
Rex1bd	8.9759e-07	0.361457	0.635	0.533	0.0190585
Dnajc8	5.96522e-07	0.360764	0.771	0.693	0.0126659
Mlf1	2.17301e-10	0.360366	0.301	0.126	4.61395e-06
Dpysl2	7.59388e-07	0.359367	0.733	0.615	0.0161241
Pcmt1	6.44384e-08	0.359042	0.594	0.471	0.00136822
Ssr1	9.74204e-08	0.358777	0.641	0.467	0.00206853
Pea15a	2.34376e-06	0.358767	0.838	0.804	0.049765
Scoc	6.74479e-09	0.358463	0.504	0.351	0.000143212
Emc2	1.44375e-07	0.358239	0.557	0.409	0.00306552
Dcun1d5	5.87683e-07	0.357923	0.58	0.447	0.0124783
Rnpepl1	2.69911e-08	0.357857	0.638	0.513	0.000573103
Ndufb10	2.21469e-06	0.357815	0.774	0.701	0.0470245
Fkbp9	1.50216e-06	0.357806	0.655	0.551	0.0318955
Lipa	1.32757e-07	0.357152	0.6	0.485	0.00281882
Ppp4r2	7.27323e-08	0.356042	0.652	0.469	0.00154433
Gna11	1.59059e-06	0.355894	0.806	0.747	0.0337731
Znhit1	2.60724e-07	0.355421	0.542	0.455	0.00553594
Rcn1	1.06401e-07	0.355047	0.432	0.303	0.00225921
Ggh	2.30466e-09	0.354953	0.481	0.305	4.89349e-05
Glmp	1.14553e-07	0.354852	0.661	0.521	0.00243231
Pfkl	7.52305e-08	0.354801	0.554	0.403	0.00159737
Ndufs3	6.89886e-07	0.354477	0.626	0.447	0.0146483
Ppp2r1a	5.36024e-07	0.354402	0.667	0.551	0.0113814
Guk1	8.09395e-08	0.354391	0.513	0.387	0.00171859
Irf8	1.71925e-06	0.35388	0.348	0.194	0.0365048
Tmem134	6.00512e-07	0.353835	0.638	0.519	0.0127507
Mrps33	1.0362e-06	0.353286	0.649	0.541	0.0220016
Etfb	1.39801e-07	0.352996	0.672	0.567	0.0029684
Nucb2	1.30897e-07	0.351731	0.412	0.238	0.00277934
Tram1	4.35928e-07	0.351547	0.565	0.461	0.00925605
Mcm6	4.24446e-10	0.351363	0.27	0.094	9.01226e-06
Vti1b	8.79214e-08	0.351114	0.614	0.473	0.00186684
Polr2m	3.36892e-07	0.350693	0.626	0.531	0.00715323
Tnnc1	2.46811e-07	0.350672	0.31	0.198	0.00524054
Mrpl36	1.30591e-07	0.34979	0.475	0.309	0.00277283
Gpr107	2.63953e-08	0.349579	0.452	0.303	0.000560452
Wdfy1	4.20191e-11	0.34769	0.333	0.164	8.92192e-07
Anp32e	5.5196e-08	0.347332	0.487	0.359	0.00117198
Vamp3	2.31532e-06	0.346913	0.707	0.573	0.0491612
Myd88	9.86863e-07	0.346814	0.455	0.327	0.0209541
Cers2	9.16528e-07	0.346597	0.554	0.433	0.0194606
Rab28	2.73335e-08	0.345756	0.481	0.303	0.000580372
Tmbim1	4.11651e-07	0.345565	0.551	0.423	0.00874058
Nmt1	1.01585e-06	0.344674	0.533	0.395	0.0215696
Idh3g	2.68664e-07	0.344156	0.577	0.423	0.00570453
Tm2d2	1.86587e-06	0.343782	0.603	0.465	0.039618
Cdr2	2.91218e-09	0.34341	0.443	0.271	6.18343e-05
Gstm2	3.91428e-07	0.343371	0.438	0.329	0.00831119
Slc35b1	1.34775e-06	0.342647	0.499	0.351	0.0286167
Sft2d1	5.10269e-08	0.342369	0.472	0.291	0.00108345
Rpa3	6.82973e-11	0.342112	0.386	0.202	1.45016e-06
Sav1	3.263e-07	0.342112	0.6	0.451	0.00692832
Hint2	2.80653e-07	0.341363	0.504	0.373	0.0059591
Mrpl4	2.00918e-07	0.341317	0.525	0.413	0.00426609
Stx7	6.2727e-07	0.340784	0.53	0.415	0.0133188
Fibp	4.24091e-08	0.3406	0.522	0.361	0.000900472
Spr	5.39675e-08	0.340297	0.565	0.419	0.00114589
Il3ra	5.83423e-07	0.340066	0.467	0.337	0.0123878
Becn1	4.43754e-08	0.340058	0.539	0.403	0.000942224
Ndufv1	6.96752e-07	0.340022	0.606	0.489	0.0147941
Yipf3	7.87078e-07	0.339568	0.586	0.461	0.016712
Psmd11	2.21337e-06	0.338957	0.629	0.501	0.0469965
Dusp8	1.6406e-08	0.338885	0.412	0.257	0.000348348
Psmd13	1.70629e-06	0.338719	0.606	0.515	0.0362296
Polr2c	8.16674e-07	0.338296	0.612	0.531	0.0173404
Chchd7	3.51197e-09	0.338271	0.406	0.275	7.45697e-05
Surf4	1.7719e-06	0.337796	0.504	0.403	0.0376228
Kctd10	1.96973e-06	0.336595	0.701	0.565	0.0418234
Sucla2	1.03398e-08	0.33587	0.423	0.277	0.000219545
Gatad1	1.09367e-06	0.335752	0.612	0.463	0.023222
Bmyc	1.03162e-08	0.335511	0.42	0.261	0.000219043
Rad23b	9.2719e-07	0.334859	0.533	0.413	0.019687
Mid1ip1	9.52748e-07	0.334629	0.354	0.251	0.0202297
Pfdn2	1.39514e-06	0.334463	0.664	0.571	0.0296231
Pcnp	2.60774e-07	0.334375	0.635	0.571	0.00553702
Dbnl	2.77737e-07	0.334097	0.571	0.413	0.00589719
Agpat5	3.28265e-08	0.333448	0.406	0.279	0.000697005
Fam3c	1.80495e-07	0.333328	0.571	0.411	0.00383245
Stx4a	1.56493e-07	0.333135	0.545	0.445	0.00332281
Plod3	6.28524e-07	0.332937	0.516	0.393	0.0133455
Bbip1	1.44099e-06	0.331636	0.501	0.341	0.0305965
Med30	6.32864e-10	0.331375	0.394	0.226	1.34376e-05
Riok3	1.72049e-06	0.331279	0.603	0.461	0.0365311
Arcn1	1.14752e-06	0.331051	0.58	0.463	0.0243652
Map3k8	1.59317e-07	0.330371	0.345	0.234	0.00338278
Tmem47	6.49259e-08	0.330274	0.365	0.271	0.00137857
Prkab1	3.67473e-07	0.329442	0.458	0.315	0.00780256
Emc3	1.18378e-06	0.329049	0.623	0.513	0.0251353
Tm9sf1	5.52709e-08	0.328975	0.383	0.257	0.00117357
Ensa	5.53291e-07	0.32891	0.51	0.377	0.011748
Mrpl53	1.87177e-06	0.328809	0.536	0.449	0.0397434
Sdhc	1.04822e-06	0.327929	0.507	0.387	0.0222569
Adrm1	1.82466e-06	0.327826	0.554	0.417	0.038743
Mcrs1	1.71241e-08	0.327385	0.484	0.311	0.000363597
Naxe	8.77969e-08	0.326913	0.449	0.323	0.00186419
1110008P14Rik	6.4339e-08	0.326321	0.42	0.24	0.00136611
Npepl1	5.47388e-07	0.325846	0.493	0.331	0.0116227
Tmem179b	2.48697e-08	0.325833	0.443	0.295	0.000528059
Ddit3	3.40137e-07	0.325374	0.435	0.297	0.00722213
Tgfb1i1	1.69367e-06	0.325038	0.507	0.385	0.0359617
Ndufa9	9.00676e-08	0.323857	0.528	0.377	0.00191241
Rnaseh2c	1.72279e-06	0.323822	0.603	0.475	0.03658
Hmgn2	1.03992e-06	0.322795	0.409	0.248	0.0220805
Hagh	1.00638e-08	0.321937	0.458	0.277	0.000213684
R3hdm2	2.29105e-06	0.321917	0.684	0.527	0.0486459
Hmgn5	5.49615e-07	0.321876	0.325	0.214	0.01167
Pfdn6	1.12385e-06	0.321694	0.6	0.487	0.0238627
Nfkbib	3.9566e-08	0.321605	0.414	0.275	0.000840104
Eif3g	1.92818e-06	0.320428	0.678	0.561	0.0409411
Matr3	8.17264e-07	0.32029	0.617	0.497	0.017353
Hnrnph2	1.12927e-06	0.318248	0.536	0.405	0.0239777
Suclg1	7.31991e-07	0.316256	0.539	0.393	0.0155424
Mageh1	1.57935e-08	0.316059	0.359	0.224	0.000335343
Prxl2c	7.22501e-07	0.315881	0.507	0.373	0.0153409
Ccpg1	1.28692e-06	0.314038	0.507	0.349	0.0273252
Mgat2	2.01891e-06	0.313379	0.565	0.443	0.0428674
Sorbs3	9.70524e-07	0.31313	0.51	0.363	0.0206071
Dpm2	1.42849e-07	0.31307	0.467	0.313	0.00303311
Etv3	7.3466e-08	0.311883	0.371	0.236	0.0015599
Mrpl11	1.8681e-06	0.311616	0.478	0.347	0.0396654
Egln2	1.3598e-07	0.309075	0.493	0.335	0.00288725
Traf7	1.21693e-06	0.30887	0.533	0.401	0.0258391
Neu1	2.03173e-06	0.308051	0.438	0.295	0.0431397
Maged1	8.10388e-07	0.307992	0.435	0.273	0.017207
Srprb	1.46173e-08	0.306955	0.348	0.194	0.000310368
Sf3b4	8.55073e-08	0.306947	0.423	0.315	0.00181558
Ap5s1	1.1788e-10	0.306648	0.281	0.11	2.50295e-06
Hnrnph3	8.90514e-07	0.306064	0.507	0.379	0.0189083
Rfk	1.30543e-06	0.304174	0.458	0.313	0.0277181
Eif2s3y	1.1733e-06	0.303942	0.429	0.289	0.0249127
Brd9	1.70276e-06	0.30357	0.516	0.421	0.0361548
Acadm	1.91725e-07	0.303174	0.438	0.291	0.00407089
Scfd1	1.88741e-07	0.301663	0.42	0.281	0.00400754
Dmwd	3.79225e-07	0.301378	0.47	0.315	0.00805208
Maea	2.64873e-07	0.300773	0.472	0.331	0.00562404
Lin7c	1.80527e-08	0.300203	0.458	0.289	0.000383312
Tcap	2.63254e-09	0.299979	0.206	0.092	5.58967e-05
Trappc1	4.9242e-07	0.298223	0.42	0.285	0.0104555
Nfyb	2.17062e-07	0.298102	0.417	0.277	0.00460887
Hsd3b7	1.32144e-06	0.297227	0.374	0.255	0.0280581
Nat9	6.65423e-09	0.29674	0.351	0.194	0.000141289
Timm17b	1.92606e-07	0.296514	0.452	0.279	0.00408961
Fam174a	1.12359e-06	0.296418	0.51	0.345	0.0238572
Herpud2	1.5771e-07	0.295477	0.484	0.301	0.00334865
Spg21	4.43302e-07	0.29472	0.406	0.263	0.00941262
Tifa	5.90407e-07	0.294347	0.246	0.122	0.0125361
Sdf2l1	5.48461e-07	0.294284	0.258	0.152	0.0116455
Tmem205	1.02603e-06	0.294237	0.504	0.411	0.0217857
Tm2d1	1.08223e-06	0.294234	0.475	0.351	0.0229791
Plbd2	4.75662e-08	0.290835	0.388	0.248	0.00100997
Trappc3	7.21591e-07	0.290599	0.536	0.399	0.0153215
Zfp593	5.89793e-07	0.28997	0.313	0.19	0.0125231
Commd4	1.14162e-06	0.286425	0.423	0.309	0.0242401
Mrps36	9.88813e-07	0.286194	0.504	0.351	0.0209955
Vamp7	6.3274e-07	0.281861	0.345	0.232	0.013435
Stip1	1.6355e-06	0.281196	0.432	0.301	0.0347266
Camk2n1	9.49674e-07	0.280497	0.388	0.259	0.0201644
Bnip3	1.57859e-06	0.280088	0.403	0.248	0.0335182
Epha2	1.29269e-06	0.27977	0.383	0.24	0.0274477
Gtf3c6	1.62832e-06	0.278687	0.383	0.279	0.0345741
Mettl1	2.28983e-06	0.278305	0.214	0.126	0.0486199
Praf2	1.59298e-06	0.276971	0.357	0.212	0.0338238
Cox6a2	1.99076e-06	0.276362	0.31	0.17	0.0422697
Prelid3b	1.03913e-07	0.276166	0.368	0.228	0.00220639
Pole3	1.04329e-06	0.273286	0.374	0.271	0.0221522
Zbtb8os	2.52223e-07	0.270367	0.307	0.158	0.00535546
Alg1	5.87763e-08	0.270349	0.33	0.192	0.001248
Tvp23b	7.32039e-07	0.270313	0.339	0.226	0.0155434
Grk6	4.3936e-07	0.269409	0.391	0.234	0.00932892
Ch25h	2.41077e-07	0.267254	0.151	0.056	0.0051188
Ppp2r3d	3.08325e-08	0.265999	0.307	0.154	0.000654667
Crtap	1.71592e-06	0.264963	0.351	0.234	0.0364341
Polr2d	3.70217e-08	0.264656	0.333	0.186	0.000786081
Atn1	4.42115e-07	0.264464	0.371	0.228	0.00938743
CAAA01118383.1	1.59976e-06	0.261296	0.362	0.208	0.0339676
Ccdc71l	8.53972e-07	0.260364	0.351	0.228	0.0181324
Papss1	1.32982e-06	0.260126	0.412	0.303	0.028236
Rnaset2b	4.78064e-10	0.257905	0.252	0.1	1.01507e-05
Golga5	5.89121e-07	0.257049	0.357	0.21	0.0125088
Samd1	3.62162e-07	0.253499	0.336	0.206	0.00768979
Rrs1	1.92492e-07	0.253233	0.246	0.124	0.00408718
Unc45a	4.10922e-07	0.25316	0.336	0.212	0.00872511
Polr3gl	9.13115e-07	0.250585	0.371	0.244	0.0193882
Cdk5rap3	1.40595e-06	0.250356	0.333	0.2	0.0298525
Scai	1.77924e-06	-0.255098	0.136	0.232	0.0377786
C1qc	8.73491e-07	-0.26095	0.032	0.1	0.0185468
Hdac8	9.08551e-07	-0.263667	0.064	0.136	0.0192913
Rnf169	2.27042e-07	-0.273414	0.174	0.295	0.00482078
Slc7a5	7.59802e-08	-0.276559	0.072	0.192	0.00161329
Herc4	8.6658e-07	-0.291707	0.209	0.293	0.0184001
Pde4d	3.18873e-07	-0.302133	0.041	0.11	0.00677064
C1qa	1.09241e-08	-0.317338	0.041	0.138	0.000231952
AW554918	7.66157e-08	-0.320056	0.113	0.218	0.00162678
Gm4951	3.44662e-08	-0.324432	0.032	0.13	0.000731822
Ern1	6.00113e-08	-0.337134	0.075	0.168	0.00127422
Dennd1a	4.75489e-07	-0.3447	0.212	0.309	0.0100961
Hist2h2aa1	1.5332e-11	-0.344828	0.075	0.248	3.25545e-07
Tbc1d5	1.84702e-07	-0.362402	0.223	0.305	0.00392177
Tanc2	2.43787e-07	-0.363721	0.171	0.299	0.00517632
AU020206	4.96994e-07	-0.368755	0.287	0.391	0.0105527
Bcas3	3.42585e-07	-0.37332	0.2	0.253	0.00727411
Bach2	8.06122e-07	-0.380632	0.18	0.216	0.0171164
Atrnl1	3.61934e-08	-0.383164	0.13	0.206	0.000768494
H2-Q6	8.77748e-07	-0.383788	0.362	0.519	0.0186372
Vti1a	1.096e-07	-0.385286	0.226	0.295	0.00232715
Mbd5	2.42896e-08	-0.388509	0.177	0.281	0.000515741
Zfp407	1.5391e-08	-0.393217	0.229	0.343	0.000326797
Itpr1	9.83333e-07	-0.407558	0.446	0.531	0.0208791
Nedd4l	3.03918e-08	-0.409275	0.223	0.307	0.000645309
Cped1	1.96565e-07	-0.416128	0.336	0.399	0.00417366
Sorbs1	1.54994e-06	-0.418455	0.62	0.597	0.0329098
Dgkh	1.58612e-06	-0.41989	0.586	0.661	0.033678
Cblb	2.19044e-09	-0.425837	0.177	0.293	4.65096e-05
Samd12	1.56949e-07	-0.428111	0.264	0.353	0.0033325
Large1	2.73287e-10	-0.432525	0.136	0.238	5.80271e-06
Fbxl17	2.45583e-07	-0.432718	0.281	0.331	0.00521446
Nol10	2.62587e-07	-0.43882	0.197	0.234	0.00557551
C1qb	9.00167e-11	-0.442056	0.072	0.188	1.91132e-06
Mcc	3.44218e-07	-0.446009	0.571	0.617	0.00730877
Tcf12	1.1618e-07	-0.447079	0.574	0.637	0.00246685
Agap1	9.34509e-10	-0.447602	0.365	0.525	1.98424e-05
Rapgef1	5.37082e-07	-0.453834	0.745	0.8	0.0114039
Rasal2	2.20194e-06	-0.457885	0.661	0.647	0.0467539
Ube2e2	2.67711e-09	-0.460703	0.18	0.267	5.6843e-05
Arhgef3	4.0329e-08	-0.465308	0.513	0.523	0.000856305
Oxr1	1.61969e-07	-0.466402	0.499	0.479	0.00343909
Arhgap26	1.1107e-10	-0.473983	0.226	0.359	2.35835e-06
Apbb2	7.33778e-07	-0.478263	0.829	0.846	0.0155803
Ebf1	1.60144e-06	-0.4812	0.774	0.82	0.0340035
H2-Q7	3.05983e-08	-0.492349	0.47	0.669	0.000649694
Dip2c	3.32724e-09	-0.493092	0.229	0.295	7.06473e-05
Postn	8.73131e-14	-0.500325	0.064	0.236	1.85392e-09
Ccdc85a	4.84579e-08	-0.519452	0.649	0.669	0.00102891
Fam172a	1.92493e-11	-0.527839	0.249	0.367	4.0872e-07
Ptprk	9.10889e-08	-0.528622	0.504	0.543	0.00193409
Fcer1g	3.78685e-07	-0.531059	0.099	0.168	0.00804061
Plekhg1	4.11123e-08	-0.531874	0.47	0.529	0.000872938
Lncpint	1.09281e-09	-0.536306	0.243	0.319	2.32036e-05
Exoc4	1.43268e-09	-0.545166	0.406	0.469	3.04201e-05
2610307P16Rik	7.59351e-13	-0.546991	0.067	0.192	1.61233e-08
Diaph2	1.65625e-08	-0.550852	0.478	0.529	0.000351671
Wwox	1.42832e-10	-0.555241	0.09	0.18	3.03275e-06
Rapgef2	3.66498e-09	-0.556082	0.6	0.611	7.78185e-05
Psd3	7.3254e-13	-0.561178	0.209	0.361	1.5554e-08
Vav3	1.69333e-11	-0.563096	0.272	0.397	3.59545e-07
Etl4	2.40004e-09	-0.568357	0.719	0.719	5.09601e-05
Spp1	8.67194e-10	-0.568418	0.452	0.491	1.84131e-05
Plcb4	4.72085e-09	-0.575493	0.82	0.854	0.000100238
Nav3	4.24577e-09	-0.583207	0.432	0.501	9.01503e-05
March3	2.30041e-11	-0.584852	0.055	0.146	4.88445e-07
Phlpp1	4.03194e-10	-0.585819	0.412	0.491	8.56103e-06
Myo1e	1.54747e-09	-0.587044	0.406	0.487	3.28574e-05
Rbp1	1.41676e-07	-0.587422	0.09	0.174	0.00300821
Ankrd28	5.67793e-11	-0.589381	0.278	0.339	1.2056e-06
Prex2	4.26708e-09	-0.594325	0.733	0.766	9.06029e-05
Gab2	6.85681e-12	-0.594402	0.249	0.345	1.45591e-07
Cobll1	5.52413e-10	-0.60413	0.174	0.232	1.17294e-05
Hdac9	6.87702e-09	-0.606584	0.191	0.21	0.00014602
Dock4	1.41673e-09	-0.609488	0.542	0.593	3.00814e-05
Atxn1	1.44003e-11	-0.613289	0.403	0.511	3.05761e-07
9530026P05Rik	4.69526e-12	-0.619942	0.081	0.174	9.96946e-08
Trpm3	7.76241e-12	-0.621496	0.284	0.375	1.64819e-07
Col1a2	4.24165e-15	-0.627846	0.194	0.405	9.0063e-11
Arih1	5.03571e-09	-0.635748	0.516	0.527	0.000106923
Sik3	2.50542e-11	-0.650551	0.336	0.415	5.31975e-07
Prkd1	1.77353e-12	-0.650902	0.194	0.277	3.76574e-08
Pard3b	3.50417e-12	-0.650979	0.241	0.333	7.4404e-08
Myo1d	9.0195e-12	-0.657137	0.499	0.519	1.91511e-07
Klf12	3.41271e-14	-0.66904	0.162	0.293	7.2462e-10
Stard13	2.80738e-11	-0.670415	0.403	0.427	5.96091e-07
Prkce	2.00083e-13	-0.674097	0.359	0.461	4.24836e-09
Ldlrad4	6.18996e-14	-0.674908	0.2	0.301	1.31432e-09
Etv6	1.12459e-12	-0.675747	0.316	0.441	2.38785e-08
Mecom	1.62447e-09	-0.687842	0.638	0.641	3.44923e-05
St6galnac3	1.99161e-13	-0.717921	0.272	0.335	4.22879e-09
Dlg2	2.37513e-15	-0.724465	0.026	0.168	5.04312e-11
Cdk8	1.36e-18	-0.728055	0.209	0.357	2.88769e-14
Lgals3	6.01399e-16	-0.741186	0.148	0.305	1.27695e-11
Cyp26b1	1.82131e-18	-0.769421	0.07	0.311	3.86719e-14
Ptprg	7.64569e-14	-0.776603	0.826	0.836	1.62341e-09
Elmo1	4.54382e-15	-0.788024	0.406	0.513	9.64789e-11
Tmtc2	7.23384e-15	-0.790638	0.304	0.395	1.53596e-10
Nup210l	2.43807e-14	-0.798243	0.194	0.269	5.17675e-10
Lyz2	9.39049e-15	-0.804839	0.296	0.403	1.99388e-10
Uba52	2.08539e-16	-0.810212	0.925	0.952	4.4279e-12
Maml2	4.42672e-16	-0.818302	0.238	0.349	9.39926e-12
Pdgfd	3.92211e-14	-0.85419	0.467	0.497	8.32782e-10
Ext1	1.14411e-14	-0.858878	0.539	0.593	2.42928e-10
Col1a1	4.78147e-26	-0.864576	0.162	0.505	1.01525e-21
Dach1	1.61401e-16	-0.865807	0.606	0.671	3.42704e-12
Fbxl7	2.75464e-17	-0.909779	0.464	0.547	5.84894e-13
Prkcg	1.72801e-11	-0.924212	0.438	0.395	3.66909e-07
Stox2	1.29818e-17	-0.924994	0.47	0.561	2.75643e-13
Zswim6	3.91701e-16	-0.991462	0.354	0.395	8.31698e-12
Col3a1	2.53736e-25	-1.00062	0.284	0.585	5.38758e-21
Arl15	1.23118e-17	-1.03683	0.299	0.405	2.61415e-13
Lrmda	1.15206e-12	-1.09081	0.006	0.216	2.44618e-08
Airn	1.22377e-22	-1.12592	0.264	0.405	2.59842e-18
Camk1d	9.06669e-20	-1.20246	0.009	0.24	1.92513e-15
Gphn	3.10794e-29	-1.20253	0.217	0.393	6.59909e-25
Plcb1	2.55496e-27	-1.37699	0.603	0.685	5.42494e-23
Ptprm	4.97989e-32	-1.38371	0.728	0.76	1.05738e-27
Magi1	1.17509e-38	-1.56171	0.478	0.631	2.49507e-34
Cmss1	4.70835e-42	-2.28252	0.2	0.335	9.99723e-38

## Sheet: 6 Fibroblasts 3
	p_val	avg_log2FC	pct.1	pct.2	p_val_adj
Cmss1	8.91461e-107	-3.72172	0.228	0.591	1.89284e-102
Erbb4	1.32834e-60	-2.94195	0.197	0.481	2.82047e-56
Camk1d	2.07332e-60	-2.21075	0.068	0.53	4.40228e-56
Maml2	1.07778e-50	-2.10819	0.319	0.572	2.28845e-46
Gphn	3.31043e-68	-2.05359	0.199	0.598	7.02903e-64
Pde4d	1.50767e-48	-1.91447	0.416	0.61	3.20124e-44
Airn	9.65144e-46	-1.84227	0.296	0.614	2.04929e-41
Gpc6	4.5875e-37	-1.83835	0.368	0.564	9.74063e-33
Magi2	4.48669e-44	-1.8068	0.211	0.485	9.52659e-40
Prkg1	1.9122e-35	-1.75009	0.219	0.455	4.06017e-31
Rbms3	1.16929e-48	-1.61823	0.604	0.788	2.48276e-44
Kcnt2	3.20763e-40	-1.60272	0.336	0.583	6.81076e-36
Ldlrad4	9.89038e-34	-1.59549	0.61	0.667	2.10002e-29
Kcnq5	2.24873e-24	-1.56515	0.094	0.258	4.77472e-20
Cdk8	4.13894e-57	-1.55032	0.333	0.659	8.78821e-53
Mecom	3.93309e-44	-1.53902	0.558	0.754	8.35114e-40
Gab2	1.62016e-40	-1.52622	0.425	0.636	3.44009e-36
Atrnl1	1.04252e-41	-1.51334	0.211	0.519	2.21359e-37
Pdzrn3	3.45426e-37	-1.49424	0.524	0.682	7.33443e-33
Myo1d	3.50075e-33	-1.43697	0.615	0.712	7.43315e-29
Ghr	5.6621e-37	-1.41471	0.595	0.742	1.20223e-32
Large1	1.56029e-33	-1.36214	0.182	0.466	3.31295e-29
Abi1	4.39558e-30	-1.31127	0.678	0.739	9.33314e-26
Mast4	1.91583e-25	-1.28242	0.766	0.765	4.06788e-21
Lncpint	2.21058e-28	-1.27799	0.527	0.663	4.69372e-24
Lama2	1.32894e-33	-1.25992	0.615	0.769	2.82175e-29
Pde7b	3.05966e-24	-1.22146	0.097	0.307	6.49658e-20
Grk5	2.06146e-24	-1.22107	0.316	0.492	4.37709e-20
March3	2.71257e-29	-1.18371	0.063	0.36	5.7596e-25
Sox6	1.94731e-27	-1.17522	0.359	0.576	4.13473e-23
Psd3	2.20669e-25	-1.16386	0.644	0.716	4.68546e-21
Eda	1.53452e-24	-1.15744	0.171	0.371	3.25824e-20
Ext1	1.21489e-27	-1.15737	0.678	0.686	2.57958e-23
Akt3	5.34119e-32	-1.15098	0.262	0.534	1.1341e-27
Rabgap1l	2.26494e-27	-1.15092	0.399	0.621	4.80916e-23
Kcnma1	2.69362e-17	-1.14557	0.393	0.462	5.71937e-13
Samd4	4.69778e-23	-1.13935	0.712	0.735	9.9748e-19
Setbp1	8.94034e-27	-1.13885	0.484	0.648	1.8983e-22
Zeb1	7.6836e-24	-1.13638	0.547	0.735	1.63146e-19
Fbxl7	1.68508e-23	-1.12736	0.379	0.553	3.57793e-19
Celf2	2.39087e-27	-1.11596	0.501	0.697	5.07653e-23
Plcb1	2.44233e-22	-1.11586	0.339	0.451	5.18581e-18
Pard3b	5.98015e-30	-1.10786	0.259	0.545	1.26977e-25
Arl15	2.85755e-28	-1.10232	0.171	0.417	6.06745e-24
Itpr1	8.44761e-29	-1.087	0.479	0.705	1.79368e-24
Rgs6	1.02656e-18	-1.07256	0.111	0.265	2.17969e-14
Ank2	1.04938e-28	-1.06998	0.416	0.663	2.22815e-24
Arih1	4.23043e-26	-1.04473	0.687	0.723	8.98248e-22
Map3k5	3.66215e-16	-1.03437	0.205	0.307	7.77585e-12
Lsamp	1.67353e-12	-1.02054	0.148	0.269	3.55341e-08
Mir99ahg	4.88403e-16	-0.996311	0.667	0.78	1.03703e-11
Tenm3	2.42053e-23	-0.981059	0.464	0.621	5.1395e-19
Dlc1	6.33299e-18	-0.978102	0.578	0.697	1.34468e-13
Negr1	1.02656e-17	-0.974579	0.274	0.439	2.1797e-13
Exoc4	2.0067e-23	-0.957712	0.362	0.587	4.26082e-19
Elmo1	7.42551e-19	-0.957339	0.467	0.557	1.57666e-14
Pdzrn4	8.23408e-09	-0.948442	0.362	0.337	0.000174834
Aff2	1.1047e-22	-0.946986	0.162	0.394	2.34561e-18
Naaladl2	3.34841e-22	-0.946076	0.077	0.314	7.10969e-18
Zfpm2	3.03671e-17	-0.943758	0.165	0.337	6.44784e-13
Trps1	5.18885e-19	-0.930373	0.892	0.856	1.10175e-14
Ptprm	4.42955e-26	-0.927691	0.265	0.508	9.40526e-22
Wwox	5.54982e-20	-0.927331	0.111	0.299	1.17839e-15
Robo1	3.1671e-18	-0.925244	0.359	0.504	6.7247e-14
Gmds	4.36963e-24	-0.922943	0.333	0.553	9.27804e-20
Diaph2	2.77251e-25	-0.920174	0.342	0.576	5.88687e-21
Dip2c	7.78429e-23	-0.919867	0.279	0.523	1.65284e-18
Unc5c	3.63202e-20	-0.916974	0.131	0.345	7.71188e-16
Ptprk	6.95031e-18	-0.91084	0.33	0.481	1.47576e-13
Cped1	9.7834e-22	-0.907359	0.519	0.682	2.07731e-17
Nhs	1.75173e-18	-0.905358	0.131	0.333	3.71946e-14
Rora	5.56372e-16	-0.894418	0.809	0.837	1.18135e-11
Rapgef2	2.72955e-20	-0.88933	0.345	0.553	5.79566e-16
Kirrel3	7.1399e-15	-0.879819	0.117	0.246	1.51601e-10
B3galt1	1.89155e-19	-0.876974	0.108	0.303	4.01632e-15
Bach2	5.2283e-23	-0.871637	0.14	0.405	1.11013e-18
Sik3	1.51154e-18	-0.868964	0.396	0.53	3.20945e-14
Arhgap6	5.84827e-17	-0.866731	0.296	0.466	1.24176e-12
Tmtc1	3.89525e-19	-0.862226	0.33	0.485	8.27078e-15
Pcdh9	4.93031e-10	-0.86195	0.356	0.364	1.04685e-05
Clasp2	4.92769e-17	-0.861175	0.393	0.572	1.0463e-12
Ust	6.16265e-24	-0.848885	0.142	0.409	1.30852e-19
Magi1	1.45215e-19	-0.848885	0.137	0.348	3.08335e-15
Btbd9	6.45281e-22	-0.845399	0.254	0.489	1.37013e-17
Pde4b	2.03401e-13	-0.840826	0.792	0.848	4.31881e-09
Greb1l	3.07565e-21	-0.840617	0.108	0.341	6.53052e-17
Rere	3.41915e-23	-0.834225	0.473	0.678	7.25988e-19
Pvt1	1.75223e-19	-0.831114	0.165	0.367	3.72051e-15
Plxdc2	4.38656e-16	-0.827395	0.835	0.871	9.31397e-12
Zswim6	8.19488e-15	-0.823854	0.481	0.602	1.74002e-10
Dennd1a	1.25906e-23	-0.82358	0.234	0.504	2.67337e-19
Ube2e2	5.30154e-19	-0.820631	0.499	0.583	1.12568e-14
Baz2b	3.12945e-15	-0.815139	0.638	0.708	6.64476e-11
Adamts12	1.67396e-17	-0.812621	0.071	0.258	3.55432e-13
Dbp	1.66872e-12	-0.807705	0.339	0.568	3.54319e-08
Atxn1	4.25635e-19	-0.805636	0.348	0.523	9.03751e-15
Atp11c	7.99453e-18	-0.794789	0.225	0.424	1.69748e-13
Man1a	8.39941e-14	-0.78912	0.524	0.583	1.78345e-09
Hecw2	2.35988e-20	-0.781631	0.148	0.386	5.01073e-16
Il16	9.41997e-18	-0.778504	0.211	0.424	2.00014e-13
Cdk14	2.9754e-16	-0.776409	0.274	0.492	6.31767e-12
Klf12	2.83565e-18	-0.761503	0.091	0.299	6.02093e-14
Xylt1	5.41776e-12	-0.76066	0.274	0.42	1.15035e-07
Sox5	7.05834e-14	-0.757986	0.402	0.53	1.4987e-09
Fam172a	1.30378e-19	-0.756401	0.251	0.473	2.76832e-15
Ebf1	8.28282e-10	-0.755697	0.695	0.792	1.75869e-05
Prickle1	2.34785e-15	-0.752153	0.117	0.352	4.98519e-11
Foxp2	1.73524e-13	-0.746704	0.615	0.67	3.68443e-09
Thrb	6.63722e-12	-0.746117	0.305	0.413	1.40928e-07
Tgfbr3	5.07193e-17	-0.744489	0.578	0.678	1.07692e-12
Bcas3	1.72278e-22	-0.743078	0.114	0.383	3.65798e-18
Slc8a1	1.36686e-15	-0.743039	0.234	0.379	2.90225e-11
Irf1	7.63839e-07	-0.737142	0.379	0.621	0.0162186
Filip1	7.67752e-11	-0.731841	0.35	0.439	1.63017e-06
Ambra1	4.24262e-20	-0.728939	0.219	0.455	9.00836e-16
Dock10	1.11075e-09	-0.72858	0.311	0.367	2.35846e-05
Prkca	5.76734e-15	-0.726096	0.556	0.64	1.22458e-10
Dock11	6.3559e-15	-0.725743	0.211	0.379	1.34955e-10
Il31ra	3.54659e-11	-0.725486	0.006	0.364	7.53047e-07
Ror1	4.74579e-16	-0.725193	0.154	0.326	1.00767e-11
Auts2	1.62535e-12	-0.719115	0.67	0.727	3.45111e-08
Pde3a	2.23284e-13	-0.718115	0.39	0.553	4.74099e-09
Rfx3	5.897e-17	-0.717036	0.074	0.295	1.25211e-12
Ctnna3	4.09462e-14	-0.713496	0.026	0.174	8.6941e-10
Pid1	8.17374e-12	-0.712223	0.291	0.458	1.73553e-07
Fbxl17	3.53804e-17	-0.708974	0.285	0.458	7.51231e-13
Mast2	1.2507e-15	-0.708037	0.379	0.557	2.65561e-11
Slit2	6.87934e-09	-0.703228	0.123	0.235	0.000146069
Zfp521	7.90549e-17	-0.702744	0.239	0.439	1.67857e-12
Frmd4b	1.48473e-14	-0.696942	0.291	0.447	3.15252e-10
Cacna1c	3.12736e-17	-0.696628	0.068	0.277	6.64032e-13
Rnf217	1.40789e-11	-0.695748	0.302	0.402	2.98938e-07
2610035D17Rik	7.54574e-16	-0.691716	0.071	0.242	1.60219e-11
Tanc2	9.10256e-13	-0.691041	0.425	0.583	1.93275e-08
Nox4	5.1454e-07	-0.688467	0.245	0.314	0.0109252
Btaf1	1.0129e-18	-0.688073	0.248	0.473	2.1507e-14
Tshz2	9.1549e-10	-0.685201	0.35	0.496	1.94386e-05
Fndc3b	9.37434e-14	-0.684554	0.877	0.867	1.99045e-09
Gulp1	2.02579e-16	-0.676827	0.319	0.523	4.30136e-12
Mbd5	9.99796e-19	-0.675739	0.14	0.375	2.12287e-14
Ppp3ca	1.20888e-11	-0.672395	0.852	0.89	2.56682e-07
Chsy3	6.63097e-12	-0.671352	0.219	0.356	1.40795e-07
Sh3d19	2.57657e-15	-0.670915	0.356	0.58	5.47084e-11
Etv6	1.16744e-12	-0.670146	0.484	0.561	2.47882e-08
Tmcc1	4.27174e-14	-0.661995	0.467	0.591	9.07019e-10
Mcc	8.61299e-11	-0.66085	0.325	0.439	1.8288e-06
Smg6	2.97662e-15	-0.660293	0.35	0.53	6.32025e-11
Kansl1	4.56904e-15	-0.658545	0.618	0.678	9.70145e-11
Farp1	3.33763e-16	-0.657615	0.285	0.504	7.08679e-12
Myo1e	4.35549e-08	-0.654169	0.456	0.5	0.000924801
Ablim1	2.90113e-12	-0.651738	0.322	0.53	6.15998e-08
Cacnb2	7.27739e-10	-0.647972	0.088	0.186	1.54521e-05
Tcf12	4.13846e-12	-0.646505	0.729	0.792	8.7872e-08
Abtb2	8.8205e-12	-0.646421	0.131	0.314	1.87286e-07
Aopep	1.38409e-10	-0.644165	0.903	0.894	2.93885e-06
Utrn	4.33602e-14	-0.641753	0.513	0.617	9.20667e-10
Ppp2r3a	6.37717e-13	-0.640179	0.353	0.519	1.35406e-08
Ern1	1.38893e-15	-0.635173	0.222	0.428	2.94911e-11
Pakap	1.82392e-14	-0.630714	0.108	0.28	3.87274e-10
Vav3	7.7093e-10	-0.628805	0.12	0.246	1.63691e-05
Piezo1	1.08578e-12	-0.626481	0.538	0.648	2.30544e-08
Plcb4	8.72687e-11	-0.622437	0.402	0.527	1.85298e-06
Sgcd	6.94768e-11	-0.618166	0.271	0.394	1.4752e-06
Ano6	1.56431e-11	-0.617808	0.53	0.629	3.3215e-07
Pde10a	4.2045e-11	-0.617612	0.162	0.269	8.92742e-07
Fbxo11	3.99878e-14	-0.615984	0.407	0.557	8.49061e-10
Jmjd1c	5.00217e-11	-0.614535	0.875	0.875	1.06211e-06
Prickle2	3.32427e-10	-0.61214	0.399	0.5	7.05842e-06
Klhl29	9.7927e-13	-0.611846	0.177	0.352	2.07928e-08
Cblb	1.05374e-09	-0.608436	0.43	0.481	2.2374e-05
Aff3	1.12166e-13	-0.607271	0.185	0.39	2.38163e-09
Glis3	1.64176e-11	-0.605542	0.04	0.159	3.48595e-07
Map4	1.84716e-11	-0.605351	0.655	0.769	3.92207e-07
Stard13	7.35344e-13	-0.601646	0.248	0.42	1.56136e-08
Junb	1.60933e-07	-0.600643	0.963	0.977	0.0034171
Kcnb1	5.77002e-14	-0.600518	0.151	0.314	1.22515e-09
Mir100hg	2.50001e-09	-0.600003	0.499	0.598	5.30828e-05
Sik2	1.98651e-12	-0.599511	0.214	0.352	4.21796e-08
Adamts6	1.47622e-15	-0.588552	0.063	0.254	3.13445e-11
Tmcc3	2.29436e-13	-0.587431	0.214	0.356	4.87162e-09
Asap1	1.92837e-11	-0.585767	0.621	0.742	4.0945e-07
Dpysl3	2.05164e-08	-0.582353	0.906	0.886	0.000435625
Pbx1	2.18602e-12	-0.580004	0.41	0.58	4.64157e-08
Vps13b	3.45351e-16	-0.57862	0.182	0.428	7.33283e-12
Slc4a4	1.08553e-08	-0.577636	0.274	0.375	0.000230491
Dock4	7.63653e-13	-0.577018	0.165	0.318	1.62146e-08
Synpo2	1.51295e-11	-0.576476	0.117	0.269	3.21244e-07
Ttc28	7.039e-11	-0.573963	0.587	0.693	1.49459e-06
Add3	1.29781e-09	-0.571295	0.527	0.652	2.75563e-05
Tmtc2	5.14307e-09	-0.570993	0.048	0.152	0.000109203
Cygb	4.89543e-07	-0.568822	0.769	0.89	0.0103945
Pitpnc1	2.37584e-10	-0.565471	0.091	0.242	5.04463e-06
Stag1	3.5349e-11	-0.565349	0.544	0.689	7.50564e-07
Exoc6b	2.0206e-13	-0.564381	0.336	0.477	4.29033e-09
Garnl3	7.68325e-09	-0.562936	0.174	0.33	0.000163138
Nsmce2	7.95699e-13	-0.561296	0.379	0.538	1.68951e-08
Nup210l	3.85617e-16	-0.558546	0.028	0.269	8.18781e-12
Plxna4	4.46079e-10	-0.555022	0.199	0.375	9.4716e-06
Nfkb1	9.10021e-07	-0.554851	0.903	0.837	0.0193225
Gpcpd1	1.33541e-12	-0.554007	0.234	0.477	2.83547e-08
Mpp7	2.12504e-06	-0.550066	0.35	0.348	0.0451209
Syne1	1.28957e-07	-0.549956	0.698	0.655	0.00273814
Rnf169	1.54369e-17	-0.54948	0.068	0.318	3.27771e-13
Pde1a	2.11927e-07	-0.548636	0.456	0.508	0.00449986
Phactr1	4.28497e-12	-0.548437	0.242	0.443	9.09827e-08
Cmip	4.31446e-10	-0.547489	0.365	0.519	9.16088e-06
Lpp	1.26608e-10	-0.54605	0.644	0.754	2.68827e-06
Map3k3	1.58102e-12	-0.545109	0.356	0.515	3.35698e-08
Elmsan1	1.62035e-11	-0.545006	0.157	0.326	3.44048e-07
Asxl1	2.14202e-10	-0.543429	0.393	0.481	4.54816e-06
Cald1	7.65867e-07	-0.541132	0.641	0.811	0.0162617
Kalrn	1.49993e-10	-0.54105	0.211	0.333	3.18481e-06
Npas3	1.19206e-12	-0.538312	0.097	0.261	2.53109e-08
Zfand3	1.10804e-12	-0.538278	0.473	0.61	2.3527e-08
Fto	1.29719e-11	-0.53514	0.376	0.538	2.75433e-07
Dlg2	1.12958e-08	-0.534532	0.174	0.28	0.000239843
Peak1	4.76527e-10	-0.534316	0.393	0.519	1.01181e-05
Pard3	3.29888e-13	-0.533153	0.33	0.534	7.00451e-09
Mcu	7.15421e-12	-0.532924	0.225	0.356	1.51905e-07
Prkcg	8.87056e-11	-0.53242	0.085	0.216	1.88349e-06
Dlg1	1.36542e-11	-0.532413	0.37	0.523	2.89919e-07
Pdlim5	1.16121e-07	-0.527747	0.615	0.652	0.00246559
Bnc2	3.19129e-14	-0.524889	0.034	0.227	6.77607e-10
Fhit	9.83197e-12	-0.524889	0.037	0.167	2.08762e-07
Ifrd1	8.72276e-08	-0.52486	0.96	0.943	0.0018521
Lrch3	4.12482e-12	-0.523481	0.299	0.496	8.75823e-08
Csnk1g1	2.72031e-11	-0.523408	0.285	0.432	5.77604e-07
Ptprj	5.25541e-10	-0.523408	0.276	0.402	1.11588e-05
Smyd3	1.42613e-14	-0.522938	0.094	0.284	3.02811e-10
Prkce	1.24118e-11	-0.522724	0.168	0.326	2.6354e-07
Zbtb16	4.75504e-12	-0.521727	0.236	0.394	1.00964e-07
Pld1	4.80234e-13	-0.519691	0.202	0.447	1.01968e-08
Carmil1	7.83081e-11	-0.519186	0.234	0.405	1.66272e-06
Prkn	1.6297e-11	-0.516687	0.011	0.197	3.46035e-07
Sulf1	6.59447e-07	-0.516101	0.567	0.598	0.014002
Lrrk1	9.85675e-09	-0.515903	0.496	0.633	0.000209288
Ehbp1	7.15389e-13	-0.514865	0.168	0.33	1.51898e-08
Steap3	6.99864e-12	-0.512449	0.49	0.697	1.48602e-07
Hivep2	1.05375e-06	-0.511083	0.88	0.837	0.0223743
Nfia	2.48182e-08	-0.510852	0.903	0.871	0.000526965
mt-Nd3	1.24019e-12	-0.51068	0.966	0.966	2.63329e-08
Sorbs1	4.29029e-08	-0.510143	0.422	0.485	0.000910957
Arhgap21	7.19631e-09	-0.50722	0.504	0.598	0.000152799
Myo9a	1.49952e-11	-0.506793	0.365	0.523	3.18394e-07
Nr3c2	3.2203e-10	-0.505628	0.108	0.246	6.83767e-06
Smurf2	8.18651e-11	-0.50523	0.453	0.636	1.73824e-06
Nav1	9.79866e-09	-0.505148	0.436	0.648	0.000208055
Ankrd28	1.07079e-06	-0.50427	0.595	0.58	0.022736
Tbc1d5	8.94688e-13	-0.50382	0.131	0.322	1.89969e-08
Zbtb7c	7.8173e-09	-0.503615	0.154	0.277	0.000165985
Dtnb	1.73018e-10	-0.503379	0.137	0.261	3.6737e-06
Ascc3	3.99832e-09	-0.50323	0.51	0.633	8.48964e-05
Phf21a	1.93984e-10	-0.502746	0.285	0.439	4.11887e-06
Ptprg	6.22725e-10	-0.502478	0.348	0.473	1.32223e-05
Atp9b	7.30426e-11	-0.501131	0.305	0.462	1.55091e-06
Sh3rf3	2.42333e-13	-0.495931	0.068	0.258	5.14547e-09
Chrm3	2.45017e-08	-0.49537	0.031	0.117	0.000520244
Rapgef4	1.59491e-07	-0.494717	0.254	0.345	0.00338648
Gm15564	8.58203e-15	-0.492949	0.023	0.277	1.82222e-10
Fmnl2	1.07227e-09	-0.492463	0.162	0.326	2.27675e-05
Fchsd2	1.72462e-07	-0.491979	0.422	0.538	0.00366188
Nr6a1	2.04135e-13	-0.488516	0.028	0.212	4.3344e-09
Ralgapa2	6.93185e-14	-0.487749	0.091	0.284	1.47184e-09
Zhx2	8.40715e-10	-0.486643	0.256	0.379	1.78509e-05
Heg1	3.4178e-08	-0.484788	0.262	0.432	0.000725703
Nf1	1.12624e-10	-0.482618	0.399	0.508	2.39135e-06
Arid1b	1.54227e-10	-0.480307	0.487	0.621	3.2747e-06
Uty	2.43168e-11	-0.479158	0.157	0.311	5.16318e-07
Pdgfd	4.05356e-07	-0.479105	0.051	0.11	0.00860692
Vti1a	7.79356e-11	-0.478647	0.211	0.345	1.65481e-06
Lcor	7.7612e-12	-0.475669	0.151	0.33	1.64794e-07
Atxn7	1.85305e-08	-0.475596	0.413	0.545	0.000393459
Zbtb20	6.90252e-09	-0.475191	0.977	0.989	0.000146561
Plcl1	1.21707e-11	-0.473749	0.074	0.235	2.58421e-07
C1qtnf7	1.01901e-06	-0.470387	0.402	0.538	0.0216367
Klf7	3.86188e-07	-0.469627	0.604	0.735	0.00819994
Frmd4a	3.37581e-07	-0.469114	0.251	0.36	0.00716786
Fyn	7.98218e-09	-0.46805	0.313	0.481	0.000169486
Mbnl2	9.47673e-08	-0.467874	0.929	0.913	0.00201219
Pknox2	1.89327e-09	-0.4659	0.145	0.277	4.01998e-05
Wdfy3	4.359e-12	-0.465489	0.311	0.515	9.25547e-08
Mthfd1l	1.37298e-10	-0.464973	0.1	0.25	2.91525e-06
Nckap5	7.60453e-07	-0.464044	0.097	0.186	0.0161467
Sobp	4.08349e-07	-0.463575	0.399	0.519	0.00867048
Ankrd12	1.65097e-06	-0.463489	0.709	0.811	0.0350551
Arhgap10	5.3683e-09	-0.462876	0.296	0.42	0.000113985
Atf6	2.77784e-08	-0.461966	0.479	0.549	0.000589818
Dst	1.43493e-07	-0.461152	0.909	0.89	0.00304679
Sptbn1	2.58167e-08	-0.46011	0.917	0.958	0.000548166
Traf3	5.56716e-09	-0.456068	0.259	0.405	0.000118207
Hdac8	1.74134e-12	-0.455441	0.085	0.261	3.69739e-08
Ankhd1	6.4961e-08	-0.452009	0.385	0.489	0.00137932
Dnajc1	1.87931e-08	-0.451863	0.678	0.716	0.000399034
Atp10a	3.28431e-07	-0.451493	0.268	0.367	0.00697358
Bicc1	1.86912e-06	-0.450142	0.758	0.86	0.0396871
Wipf1	8.8883e-09	-0.449752	0.39	0.515	0.000188725
Ncoa2	1.04239e-09	-0.448818	0.236	0.36	2.21331e-05
Numb	1.11371e-10	-0.44777	0.254	0.439	2.36474e-06
Rapgef6	5.84553e-07	-0.446683	0.63	0.663	0.0124118
Sh3rf1	2.63031e-08	-0.446338	0.256	0.42	0.000558495
Tnrc6b	1.69752e-08	-0.442876	0.504	0.655	0.000360433
Cachd1	6.23379e-09	-0.44163	0.231	0.405	0.000132362
Stxbp5	4.7173e-10	-0.441371	0.256	0.439	1.00162e-05
Svil	2.07084e-07	-0.440604	0.575	0.716	0.00439702
Insr	3.19423e-13	-0.439432	0.128	0.345	6.78232e-09
Osbpl8	1.10222e-07	-0.4388	0.407	0.5	0.00234034
Dis3l2	3.27629e-12	-0.436862	0.091	0.277	6.95654e-08
Kat6b	6.23162e-09	-0.434266	0.393	0.545	0.000132316
Ralgapa1	2.96753e-09	-0.431564	0.288	0.447	6.30096e-05
Scmh1	1.47157e-08	-0.431192	0.302	0.447	0.000312459
Gucy1a2	2.06227e-12	-0.430562	0.04	0.212	4.37882e-08
Pkia	6.42071e-07	-0.429629	0.219	0.322	0.0136331
Znrf3	1.72748e-11	-0.429549	0.091	0.246	3.66797e-07
Dock1	3.59512e-09	-0.42784	0.342	0.477	7.63351e-05
Mtmr3	3.41089e-09	-0.42604	0.265	0.439	7.24235e-05
Homer1	8.15198e-08	-0.425977	0.259	0.398	0.00173091
Nbea	7.94357e-08	-0.42555	0.291	0.405	0.00168666
Ncoa1	6.35994e-09	-0.422591	0.308	0.439	0.000135041
2210408I21Rik	4.57844e-11	-0.422338	0.068	0.227	9.72141e-07
Agmo	1.34484e-10	-0.422131	0.088	0.235	2.8555e-06
Ulk2	2.34356e-08	-0.421904	0.362	0.477	0.000497608
Rps6ka5	6.61861e-10	-0.421686	0.123	0.269	1.40533e-05
Rap1gds1	9.92734e-07	-0.4216	0.359	0.428	0.0210787
Psme4	8.05645e-08	-0.420583	0.453	0.545	0.00171062
Zc3h12b	3.20573e-10	-0.418607	0.063	0.193	6.80672e-06
Cep112	4.14785e-09	-0.418238	0.111	0.227	8.80713e-05
Arhgef12	1.48866e-07	-0.417749	0.849	0.875	0.00316086
Strbp	1.82268e-08	-0.417033	0.274	0.383	0.000387009
Chd9	1.84611e-08	-0.415312	0.521	0.652	0.000391985
Fgfr2	1.62742e-08	-0.414269	0.165	0.345	0.000345549
Rasal2	1.18289e-07	-0.410933	0.228	0.337	0.00251163
Plekha5	3.27231e-07	-0.410933	0.353	0.455	0.00694809
Polr2a	5.0917e-08	-0.408373	0.413	0.564	0.00108112
Tcf7l2	2.31384e-07	-0.408322	0.365	0.508	0.00491298
Mitf	2.85431e-07	-0.407543	0.154	0.284	0.00606055
Gk5	1.76309e-09	-0.407427	0.14	0.303	3.74357e-05
Gnaq	1.66336e-07	-0.405871	0.416	0.523	0.00353182
Itpr2	3.20912e-07	-0.405648	0.376	0.489	0.00681393
Snx24	3.47547e-09	-0.404728	0.254	0.424	7.37947e-05
Magi3	2.23449e-08	-0.40439	0.222	0.322	0.000474449
Arhgap24	8.83637e-08	-0.403628	0.103	0.212	0.00187623
Trio	4.81303e-07	-0.402	0.49	0.625	0.0102195
Cdkal1	4.25247e-11	-0.400207	0.142	0.314	9.02926e-07
Rassf8	4.35367e-07	-0.399814	0.328	0.455	0.00924415
Slc41a2	2.45707e-07	-0.39901	0.288	0.398	0.00521709
Pan3	2.79084e-07	-0.397562	0.379	0.477	0.00592579
Tom1	4.56311e-09	-0.39745	0.188	0.33	9.68885e-05
Phlpp1	2.92306e-10	-0.396506	0.134	0.292	6.20653e-06
Ptk2	4.19964e-08	-0.396404	0.316	0.451	0.000891711
Meis1	1.13513e-07	-0.396257	0.293	0.443	0.00241021
Ahcyl2	1.32548e-06	-0.396227	0.313	0.36	0.0281438
Nrf1	5.92874e-09	-0.394407	0.214	0.352	0.000125885
Rptor	6.26723e-11	-0.39336	0.151	0.352	1.33072e-06
Slc7a5	8.15252e-08	-0.393274	0.128	0.265	0.00173102
Erc1	1.48157e-06	-0.393231	0.407	0.511	0.0314582
Zfp407	1.27481e-10	-0.392967	0.134	0.314	2.7068e-06
Ranbp9	1.32022e-07	-0.392588	0.422	0.511	0.00280322
Ssh2	3.75733e-07	-0.389605	0.265	0.383	0.00797794
Fli1	3.11065e-07	-0.388713	0.219	0.352	0.00660484
Map4k3	5.3244e-10	-0.387365	0.194	0.375	1.13053e-05
Rbfox2	1.12854e-06	-0.386341	0.57	0.67	0.0239623
Hip1	1.85656e-06	-0.386218	0.274	0.314	0.0394204
Apba1	1.4705e-08	-0.385462	0.125	0.235	0.000312231
Sgip1	7.28625e-11	-0.383675	0.06	0.22	1.54709e-06
Arhgap42	2.98929e-07	-0.382174	0.228	0.348	0.00634716
Rb1	1.84343e-10	-0.38215	0.131	0.322	3.91415e-06
Mrtfa	6.19872e-11	-0.381109	0.1	0.284	1.31617e-06
Stk3	3.58412e-07	-0.379906	0.242	0.383	0.00761017
Gbe1	1.14378e-08	-0.379301	0.157	0.292	0.000242859
Cpeb1	4.1161e-07	-0.379224	0.296	0.462	0.00873972
Usp32	2.52294e-09	-0.375389	0.256	0.39	5.35696e-05
Acaca	5.7796e-09	-0.372552	0.174	0.318	0.000122718
Sbf2	6.69089e-07	-0.372238	0.365	0.481	0.0142068
Slc44a1	2.26456e-06	-0.371644	0.533	0.636	0.0480833
Acap2	8.66351e-07	-0.371337	0.473	0.538	0.0183952
Itsn2	1.2534e-06	-0.369983	0.362	0.485	0.0266135
Maml3	1.29031e-06	-0.368353	0.199	0.318	0.0273973
Lama4	8.31747e-07	-0.36795	0.282	0.485	0.0176605
Sntg2	8.83578e-08	-0.367431	0.128	0.239	0.0018761
Braf	1.08203e-06	-0.364958	0.396	0.477	0.0229748
AW554918	1.91479e-10	-0.364515	0.074	0.235	4.06567e-06
Mib1	2.86967e-07	-0.364474	0.444	0.557	0.00609316
Ston2	1.23625e-08	-0.363267	0.123	0.261	0.000262492
Angpt1	3.27097e-07	-0.362259	0.16	0.284	0.00694526
Bbs9	2.53706e-09	-0.361896	0.094	0.246	5.38695e-05
Dcaf6	4.38793e-07	-0.361464	0.217	0.326	0.0093169
Ints6l	9.43489e-09	-0.361114	0.08	0.208	0.000200331
Map2k4	1.9089e-07	-0.360926	0.325	0.462	0.00405317
4930402H24Rik	2.46621e-07	-0.36066	0.202	0.318	0.00523651
Pik3r3	4.96932e-08	-0.359894	0.057	0.163	0.00105514
Mon2	6.6519e-07	-0.357541	0.442	0.561	0.014124
Fam13b	7.42687e-08	-0.356485	0.254	0.386	0.00157695
Iqsec2	2.99306e-08	-0.356227	0.194	0.333	0.000635517
Sesn1	6.16282e-09	-0.354488	0.16	0.322	0.000130855
Ino80	1.03247e-07	-0.353789	0.342	0.511	0.00219223
Rnf150	7.64813e-09	-0.3536	0.085	0.223	0.000162393
Prdm5	5.14176e-08	-0.353013	0.197	0.337	0.00109175
Bcr	2.03933e-06	-0.352516	0.302	0.451	0.0433011
Adcy2	5.67058e-07	-0.350019	0.088	0.178	0.0120404
Alpk1	1.31528e-07	-0.349695	0.085	0.186	0.00279273
Scaf8	1.30979e-06	-0.349657	0.313	0.447	0.0278108
Usp34	1.01703e-06	-0.349612	0.661	0.75	0.0215946
Mrtfb	2.56792e-07	-0.349533	0.185	0.314	0.00545247
Hdx	6.28532e-08	-0.348872	0.077	0.174	0.00133456
Gm42418	6.89575e-07	-0.346517	1	1	0.0146417
Tom1l2	7.47945e-08	-0.346501	0.202	0.337	0.00158811
Wdpcp	8.01888e-09	-0.345432	0.088	0.208	0.000170265
Rfx7	1.6271e-06	-0.344262	0.236	0.375	0.0345483
Rbm6	3.74282e-07	-0.343188	0.425	0.523	0.00794713
Esr1	2.65758e-08	-0.342582	0.1	0.22	0.000564284
Gnao1	6.43959e-07	-0.342149	0.311	0.439	0.0136732
Aak1	1.79918e-06	-0.339328	0.259	0.405	0.038202
Garem1	7.71215e-07	-0.338963	0.145	0.246	0.0163752
Fancc	2.44045e-11	-0.337352	0.031	0.212	5.18182e-07
Zfyve9	4.28309e-07	-0.335971	0.259	0.432	0.0090943
Ap3b1	1.56303e-06	-0.335291	0.322	0.466	0.0331879
Adamts10	3.44309e-07	-0.334723	0.231	0.345	0.00731071
Arhgap32	2.02902e-06	-0.334064	0.168	0.277	0.0430822
Ksr1	4.69461e-07	-0.332545	0.148	0.28	0.00996807
Yars	1.03225e-06	-0.331731	0.265	0.379	0.0219177
Dock6	2.67e-08	-0.331435	0.197	0.356	0.000566921
Camkmt	1.21242e-09	-0.330985	0.057	0.193	2.57432e-05
Rev3l	2.28726e-07	-0.33039	0.211	0.352	0.00485654
Nsd1	7.48914e-07	-0.328471	0.345	0.455	0.0159017
Snx29	1.16386e-09	-0.326869	0.057	0.197	2.47122e-05
Tmem164	1.18801e-07	-0.326369	0.134	0.261	0.00252251
9530026P05Rik	5.87065e-07	-0.325925	0.04	0.121	0.0124652
Cdk19	1.094e-07	-0.325626	0.171	0.303	0.00232288
Ehmt1	3.84617e-07	-0.325542	0.179	0.352	0.00816657
Kcnj8	1.80836e-07	-0.325357	0.068	0.197	0.00383968
Dnmt3a	4.88126e-07	-0.325072	0.202	0.398	0.0103644
Ide	2.28415e-07	-0.324776	0.285	0.462	0.00484994
Scfd2	1.00876e-08	-0.322985	0.057	0.182	0.000214189
Fam219a	2.60062e-07	-0.322064	0.083	0.197	0.00552191
Trpm3	1.74995e-06	-0.319939	0.137	0.242	0.0371568
Kif13a	3.11104e-07	-0.319414	0.177	0.311	0.00660568
Tcf7l1	7.61218e-07	-0.319303	0.236	0.375	0.0161629
Lrba	2.24636e-09	-0.317066	0.083	0.227	4.7697e-05
Cbfa2t2	5.20408e-10	-0.312701	0.117	0.311	1.10498e-05
Tshz3	2.1085e-06	-0.312369	0.179	0.277	0.0447698
Vwa8	6.69217e-09	-0.311132	0.1	0.25	0.000142095
Srgap3	1.96124e-07	-0.310406	0.16	0.295	0.00416431
Atad2b	6.48794e-07	-0.308085	0.199	0.348	0.0137758
Pdss2	2.91588e-09	-0.306982	0.066	0.205	6.19129e-05
Gli2	3.94876e-07	-0.301213	0.108	0.239	0.00838439
Elp4	1.06239e-07	-0.300924	0.12	0.239	0.00225576
Prkd1	1.88829e-06	-0.300342	0.111	0.189	0.0400941
Stat5b	1.0533e-07	-0.296928	0.137	0.307	0.00223646
Sos2	6.30022e-07	-0.29572	0.254	0.394	0.0133773
1010001N08Rik	1.6845e-06	-0.295147	0.097	0.189	0.0357669
Itsn1	1.88251e-06	-0.294634	0.214	0.341	0.0399713
Armh3	1.08993e-09	-0.291498	0.04	0.189	2.31424e-05
Zfp292	5.31861e-08	-0.290324	0.12	0.277	0.0011293
Col4a3	2.25794e-07	-0.286754	0.091	0.223	0.00479428
Eml6	5.25566e-08	-0.285402	0.023	0.133	0.00111593
Zzef1	1.88313e-06	-0.284485	0.177	0.333	0.0399845
Cradd	5.037e-07	-0.284063	0.111	0.22	0.0106951
2610307P16Rik	9.94074e-08	-0.283928	0.014	0.117	0.00211072
Stard9	5.22283e-08	-0.279336	0.105	0.246	0.00110896
Shroom4	1.57901e-06	-0.278938	0.04	0.117	0.033527
Map3k14	2.08956e-07	-0.278777	0.066	0.186	0.00443677
Kdm4c	7.04532e-07	-0.275227	0.128	0.258	0.0149593
Avil	1.22162e-07	-0.271075	0.046	0.155	0.00259387
1600010M07Rik	6.00227e-08	-0.270175	0.003	0.152	0.00127446
Lin52	1.16062e-06	-0.266944	0.077	0.17	0.0246433
Trerf1	1.40517e-06	-0.264762	0.08	0.201	0.029836
Synj2	1.13489e-06	-0.263034	0.091	0.227	0.024097
Prkag2	2.23353e-07	-0.258507	0.074	0.201	0.00474246
Sdccag8	2.02688e-06	-0.256899	0.108	0.235	0.0430367
Akap10	2.14136e-06	-0.254814	0.097	0.216	0.0454674
C030013C21Rik	1.48182e-07	0.272686	0.262	0.095	0.00314634
2410004B18Rik	1.80303e-06	0.284091	0.442	0.265	0.0382837
Mocs2	2.20125e-06	0.291588	0.493	0.333	0.0467392
Pno1	7.04496e-07	0.294446	0.33	0.152	0.0149586
Psmb7	2.04817e-06	0.300859	0.809	0.621	0.0434888
Ngdn	7.17414e-07	0.303312	0.538	0.348	0.0152329
Med4	8.67929e-07	0.304744	0.439	0.292	0.0184287
Trmt10c	2.38133e-07	0.307828	0.362	0.159	0.00505627
Zpr1	2.56282e-07	0.309544	0.479	0.261	0.00544163
Snhg16	1.57619e-08	0.311533	0.308	0.129	0.000334671
Samm50	6.10547e-07	0.313523	0.61	0.424	0.0129637
Fcf1	7.88124e-07	0.315898	0.57	0.371	0.0167342
Tsr1	1.38189e-06	0.317546	0.407	0.205	0.0293418
Ddrgk1	2.23033e-06	0.318778	0.792	0.701	0.0473566
Fndc4	4.44801e-07	0.31988	0.359	0.22	0.00944447
Ruvbl1	2.21244e-06	0.320949	0.533	0.36	0.0469767
Dkc1	1.63209e-06	0.321175	0.43	0.265	0.0346542
Pabpn1	1.11084e-06	0.322775	0.883	0.803	0.0235865
Med10	4.26518e-08	0.322841	0.504	0.318	0.000905626
Rps19bp1	3.82392e-07	0.323477	0.396	0.227	0.00811933
Tma16	9.05805e-07	0.326032	0.405	0.239	0.019233
Yeats4	1.67405e-06	0.327471	0.524	0.379	0.0355451
Selenok	1.83586e-06	0.32832	0.977	0.951	0.0389809
Psmd4	5.52353e-07	0.329324	0.781	0.716	0.0117281
Psma6	1.11393e-06	0.331513	0.769	0.636	0.0236521
Pfdn4	5.16399e-07	0.331777	0.541	0.386	0.0109647
Rpl7l1	3.97931e-07	0.333747	0.493	0.314	0.00844927
Ube2l3	1.53626e-06	0.334332	0.775	0.67	0.0326194
Phf5a	7.12582e-07	0.334942	0.618	0.5	0.0151302
Rrp15	1.41532e-06	0.335092	0.47	0.322	0.0300514
Lap3	1.28063e-06	0.336839	0.519	0.375	0.0271917
Ogfr	3.04547e-07	0.337088	0.53	0.356	0.00646645
Mapre1	2.00507e-06	0.33991	0.846	0.792	0.0425736
Supt4a	5.2536e-07	0.340261	0.778	0.61	0.011155
Atp5f1	8.43348e-07	0.34067	0.886	0.826	0.0179068
Plekhf1	9.09177e-07	0.341656	0.396	0.258	0.0193046
Eif3m	2.05732e-06	0.341997	0.786	0.708	0.0436832
Tmem208	1.78083e-06	0.342771	0.684	0.489	0.0378123
Ythdf1	5.30006e-08	0.343562	0.598	0.379	0.00112536
Gtf2b	8.24927e-07	0.343591	0.61	0.439	0.0175157
Skp1a	1.30505e-06	0.346594	0.809	0.663	0.0277101
Rbmxl1	5.66375e-08	0.346659	0.53	0.311	0.00120258
Dnaja2	2.06412e-06	0.348384	0.9	0.731	0.0438274
Grpel1	2.26719e-07	0.349056	0.652	0.473	0.00481392
Ddx5	5.77746e-07	0.349484	0.98	0.992	0.0122673
Brix1	9.37947e-07	0.350825	0.607	0.439	0.0199154
Ftsj3	3.50942e-07	0.351738	0.43	0.269	0.00745156
Morf4l1	4.36481e-07	0.35218	0.983	0.958	0.00926779
Syf2	8.64859e-08	0.352537	0.826	0.746	0.00183635
Pak1ip1	8.25797e-07	0.352707	0.658	0.549	0.0175342
Lrpap1	4.1824e-07	0.352978	0.846	0.758	0.00888049
Rpl26	1.87508e-06	0.353264	1	0.981	0.0398136
Psmb1	1.02452e-06	0.353334	0.906	0.852	0.0217536
Ndufb11	3.47309e-07	0.3553	0.94	0.871	0.00737442
Eif4g2	2.31378e-06	0.355633	0.943	0.917	0.0491285
Rbm8a	6.98046e-08	0.357147	0.812	0.678	0.00148216
Psmb4	7.21888e-07	0.357342	0.915	0.852	0.0153279
Snw1	4.80579e-07	0.357397	0.749	0.595	0.0102041
Eif3g	1.12398e-07	0.357798	0.769	0.587	0.00238655
Rpl36	1.19068e-06	0.357874	0.986	0.97	0.0252817
Eif3i	1.54013e-06	0.357975	0.872	0.758	0.0327015
Ssr3	8.7112e-07	0.358303	0.872	0.803	0.0184965
Sumo2	2.34557e-06	0.359621	0.954	0.905	0.0498034
Pcmt1	9.619e-07	0.359857	0.715	0.587	0.020424
Oaz1	4.44433e-07	0.360052	0.977	0.951	0.00943664
Gnas	3.54539e-07	0.36017	0.994	0.985	0.00752792
Tmem128	5.89177e-08	0.360366	0.538	0.307	0.001251
Csnk1a1	6.98993e-07	0.360418	0.946	0.883	0.0148417
Hypk	4.76573e-07	0.36051	0.593	0.402	0.0101191
Ppan	2.22105e-06	0.36059	0.496	0.322	0.0471596
Ggh	9.12768e-07	0.360798	0.707	0.545	0.0193808
Cers2	2.36843e-07	0.361656	0.744	0.621	0.00502889
Timm8a1	4.17789e-07	0.362131	0.45	0.311	0.00887091
Psmd7	6.20382e-07	0.362405	0.889	0.795	0.0131726
Mrfap1	1.51952e-07	0.363083	0.949	0.902	0.0032264
Bcap31	3.15546e-07	0.363659	0.903	0.78	0.00669999
Rps19	1.44107e-06	0.36452	0.997	0.992	0.0305983
Trp53	1.26681e-06	0.364635	0.692	0.576	0.0268983
Ptov1	7.56165e-07	0.365381	0.792	0.701	0.0160557
Naca	9.80592e-07	0.367227	0.98	0.97	0.0208209
Rnmt	2.2484e-08	0.36958	0.51	0.314	0.000477402
Rpl28	2.14631e-06	0.369942	0.991	0.989	0.0455725
Golt1b	7.23803e-07	0.371857	0.598	0.409	0.0153685
Psma1	2.36846e-07	0.372187	0.752	0.598	0.00502895
Pa2g4	7.8833e-08	0.373617	0.695	0.564	0.00167386
Crtap	1.20312e-06	0.374234	0.721	0.598	0.0255459
Rpl13	6.33423e-07	0.375001	0.994	0.996	0.0134495
Calm2	9.41276e-07	0.375289	0.974	0.985	0.0199861
Tspan7	1.52286e-06	0.375893	0.575	0.428	0.0323349
Sf3b5	7.22957e-07	0.376018	0.752	0.61	0.0153505
Wdr83os	1.59437e-07	0.376173	0.84	0.682	0.00338532
Ak2	1.51131e-06	0.376634	0.536	0.318	0.0320897
Rpl35	1.03463e-06	0.377014	0.991	0.97	0.0219683
Cnn3	1.63502e-06	0.377127	0.883	0.78	0.0347165
Yipf4	1.10239e-07	0.377317	0.795	0.617	0.0023407
Gm11808	1.01852e-07	0.377563	0.564	0.364	0.00216263
Ndufa13	2.37771e-07	0.377563	0.96	0.909	0.00504859
Rbm7	2.82991e-08	0.377718	0.709	0.523	0.000600875
Kti12	2.81462e-08	0.378469	0.407	0.193	0.000597628
Tmbim6	4.52578e-07	0.378536	0.872	0.788	0.00960958
Tbca	1.69995e-07	0.378634	0.92	0.799	0.0036095
Eef2	1.32505e-06	0.378694	0.977	0.973	0.0281348
Tra2b	3.90928e-07	0.379321	0.917	0.856	0.00830058
Rpl34	1.36472e-06	0.379423	0.991	0.985	0.0289771
Dhx15	3.114e-08	0.38048	0.738	0.64	0.000661195
Tsn	2.631e-07	0.381051	0.821	0.67	0.0055864
Rnasek	1.1592e-06	0.381215	0.866	0.758	0.0246133
Zcrb1	9.30542e-08	0.381604	0.877	0.72	0.00197582
Rpl27	5.9561e-08	0.383977	0.991	0.985	0.00126466
Cox7b	1.14252e-06	0.384225	0.889	0.852	0.0242591
Rpl31	1.28221e-07	0.38438	0.977	0.947	0.00272251
Psma3	4.27689e-08	0.384708	0.937	0.902	0.000908113
Tpm4	1.98516e-06	0.387095	0.906	0.875	0.0421508
Acp1	1.74077e-07	0.387255	0.544	0.364	0.00369617
Arpc2	1.12175e-06	0.387873	0.932	0.917	0.0238182
[truncated: 439 more rows]

## Sheet: 7 Endothelial cells 2
	p_val	avg_log2FC	pct.1	pct.2	p_val_adj
[truncated: 427 more rows]

[truncated: 13 more sheets: 8 Endothelial cells 3, 9 Fibroblasts 4, 10 Fibroblasts 5, 11 Macrophages 2, 12 Fibroblasts 6, 13 Macrophages 3, 14 Monocytes 2, 15 Endothelial cells 4, 16 Endothelial cells 5, 17 Endothelial cells 6, 18 B cells, 19 Oligodendrocytes, 20 T cells]
